# Supplementary material for: Redox-neutral decarboxylative coupling of fluoroalkyl carboxylic acids via dual metal photoelectrocatalysis
Source: Royal Society of Chemistry journal article supplement (doi:10.1039/d4sc06057a), 2024-01-01
Supplement: d4sc06057a1.pdf [file d4sc06057a1.pdf]

## SUPPORTING INFORMATION

### **Redox-neutral decarboxylative coupling of fluoroalkyl carboxylic acids via a dual metal photoelectrocatalysis**

Yaxing Wu,<sup>1</sup> Xiuling Wang,<sup>1,2</sup> Zhenyu Wang,<sup>1</sup> and Chao Chen<sup>\*1</sup>

1. Key Laboratory of Bioorganic Phosphorus Chemistry & Chemical Biology (Ministry of Education), Department of Chemistry, Tsinghua University, Haidian District, Beijing, 100084 (P. R. China)
2. Key Laboratory of Systems Bioengineering, Ministry of Education, Department of Pharmaceutical Engineering, School of Chemical Engineering and Technology, Tianjin University, Jingnan District, Tianjin, 300350 (P. R. China)

\* E-mail: [chenchao01@mails.tsinghua.edu.cn](mailto:chenchao01@mails.tsinghua.edu.cn). Tel: +86-10-62773684.

## TABLE OF CONTENTS

|                                                                               |      |
|-------------------------------------------------------------------------------|------|
| TABLE OF CONTENTS .....                                                       | S2   |
| MATERIALS AND METHODS.....                                                    | S3   |
| EXPERIMENTAL DATA.....                                                        | S5   |
| General procedure and reaction optimization.....                              | S5   |
| General procedure for the decarboxylative fluoroalkylation.....               | S5   |
| Optimization of reaction conditions.....                                      | S7   |
| Preparation of the substrates.....                                            | S14  |
| Substrate cope.....                                                           | S23  |
| Direct decarboxylative C(sp <sup>3</sup> )-C(sp <sup>3</sup> ) coupling. .... | S44  |
| Compatibility with cross-electrophile coupling.....                           | S47  |
| Large-scale synthesis.....                                                    | S47  |
| Mechanistic investigations.....                                               | S50  |
| Radical-trapping experiments.....                                             | S50  |
| Electricity and light on/off experiments.....                                 | S51  |
| Catalytic experiments with cerium complex.....                                | S52  |
| UV-visible absorption analysis.....                                           | S55  |
| Cyclic voltammetry (CV) measurements.....                                     | S56  |
| Determination of absolute configuration.....                                  | S58  |
| The copies of HPLC spectra.....                                               | S59  |
| The copies of NMR spectra.....                                                | S92  |
| REFERENCES OF SUPPORTING INFORMATION.....                                     | S200 |

## MATERIALS AND METHODS

All reactions were carried out under ambient atmosphere unless otherwise stated. Concentration under reduced pressure was performed by rotary evaporation at 25-45 °C at an appropriate pressure. Purified compounds were further dried under vacuum ( $10^{-4}$ - $10^{-1}$  KPa). Isolated yields refer to purified and spectroscopically pure compounds or mixtures of constitutional isomers. All air- and moisture-sensitive manipulations were performed using standard Schlenk- or glove-box techniques under an atmosphere of argon or dinitrogen.

### Starting materials

All substrates and materials were used as received from commercial suppliers, or prepared according to published procedures, respectively, unless otherwise stated. Nickel catalysts were purchased from Energy-Chemical, and stored in an anhydrous brown bottle. Various photocatalysts were purchased from Sigma-Aldrich, Bidepharm and Energy-Chemical.

### Solvents

Dry THF, DCM, DMSO and DME were purchased from Innochem (water content < 50 ppm). Dry MeCN and DMF were purchased from Energy-Chemical (water content < 30 ppm). Dry ether was obtained by post-treatment with 4 Å molecular sieve, which activated at 300 °C in muffle furnace. All deuterated solvents were purchased from Sigma-Aldrich. EtOAc and petroleum ether (boiling range 60-90 °C) was purchased from Tansoole.

### Spectroscopy and instruments

NMR spectra were recorded on a JEOL AL-400MHz spectrometer operating at 400 MHz, 101 MHz, and 376 MHz, for  $^1\text{H}$ ,  $^{13}\text{C}$ , and  $^{19}\text{F}$  acquisitions. Chemical shifts are reported in ppm with the solvent residual peak as the internal standard. For  $^1\text{H}$  NMR: chloroform-*d*,  $\delta$  7.26; dimethyl sulfoxide-*d*<sub>6</sub>,  $\delta$  2.50. For  $^{13}\text{C}$  NMR: chloroform-*d*,  $\delta$  77.16; dimethyl sulfoxide-*d*<sub>6</sub>,  $\delta$  39.52.  $^{19}\text{F}$  NMR spectra were referenced using a unified chemical shift scale based on the  $^1\text{H}$  NMR resonance of tetramethylsilane (1% (v/v) solution in the respective solvent). Data is reported as follows: s = singlet, d = doublet, t = triplet, q = quartet, m = multiplet, br = broad; coupling constants in Hz; integration. HRMS spectra were obtained using Bruker Esquire ion trap mass spectrometer in positive mode. UV-vis absorption spectra were recorded on an UV 2700.

### Chromatography

Thin layer chromatography (TLC) was performed using TLC plates pre-coated with 200  $\mu\text{m}$  thickness silica gel F254 plates and visualized by fluorescence quenching under 254 nm UV light,

phosphomolybdic Acid, and  $\text{KMnO}_4$  stain. Column chromatography was performed on silica gel (particle size 10-40  $\mu\text{m}$ , Ocean Chemical Factory of Qingdao, China). Gas chromatography-mass spectrometry (GC-MS) was performed on a Shimadzu GCMS-QP2010 SE Series chromatograph with split-mode capillary injection and FID detection. Enantiopurity was assessed *via* high performance liquid chromatography (HPLC) analysis using a Shimadzu LC-20AT Chiral HPLC Infinity chromatograph with chiral columns as noted for each compound using a hexane/isopropanol liquid phase.

### **Photochemistry**

All reactions with visible light were carried out using a photoreactor equipped with a LED module (15 W Power Purple LED 390 nm, purchased from GreeThink), consisting out of 50 LED-chips. The power of the LED was adjusted using a linear regulator.



## EXPERIMENTAL DATA

## General procedure and reaction optimization

General procedure for the decarboxylative coupling of  $\alpha$ -CF<sub>3</sub> carboxylic acids

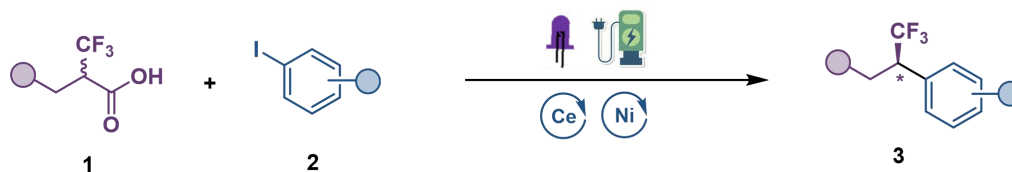

**Scheme S1.** General procedure for the decarboxylative coupling of  $\alpha$ -CF<sub>3</sub> carboxylic acids.

An oven-dried screw-cap vial was equipped with a stir bar, a threaded Teflon cap fitted with electrical feedthroughs, a graphite plate anode (2.5 cm \* 0.5 cm), and a platinum plate cathode (2.5 cm \* 0.5 cm). Under nitrogen atmosphere, *n*-Bu<sub>4</sub>NBF<sub>4</sub> (66 mg, 0.10 mmol, 0.5 eq.), sodium phthalate (**A4**) (58 mg, 0.24 mmol, 1.2 eq.),  $\alpha$ -CF<sub>3</sub> carboxylic acid (0.20 mmol, 1.0 eq.), aryl iodide (0.24 mmol, 1.2 eq.), CeCl<sub>3</sub> (1.5 mg, 0.006 mmol, 3 mol%), NiCl<sub>2</sub> DME (2.2 mg, 0.01 mmol, 5 mol%), and chiral ligand (**L1**) (3.4 mg, 0.015 mmol, 7.5 mol%) were added to this reaction vessel. After that, the mixture of MeCN and DMSO (9:1(v:v), 2.0 mL) were added via syringe. The reaction was irradiated with purple LEDs (15 W, 390 nm) under the vessel and electrolysis was initiated at a constant current of 2.0 mA, The temperature was kept at approximately 30°C through the use of a cooling fan. After 10 hours, the photolysis and electrolysis were terminated and the reaction was quenched with 10 mL water, then extracted with DCM (3 x 10 mL). The combined organic phase was dried with anhydrous Na<sub>2</sub>SO<sub>4</sub> and concentrated under vacuum. The residue was further purified by column chromatography to afford corresponding coupling products, which was characterized by GC-MS analysis, <sup>1</sup>H NMR, <sup>13</sup>C NMR and <sup>19</sup>F NMR spectroscopy. The enantioselectivity was determined via HPLC analysis with chiral columns.

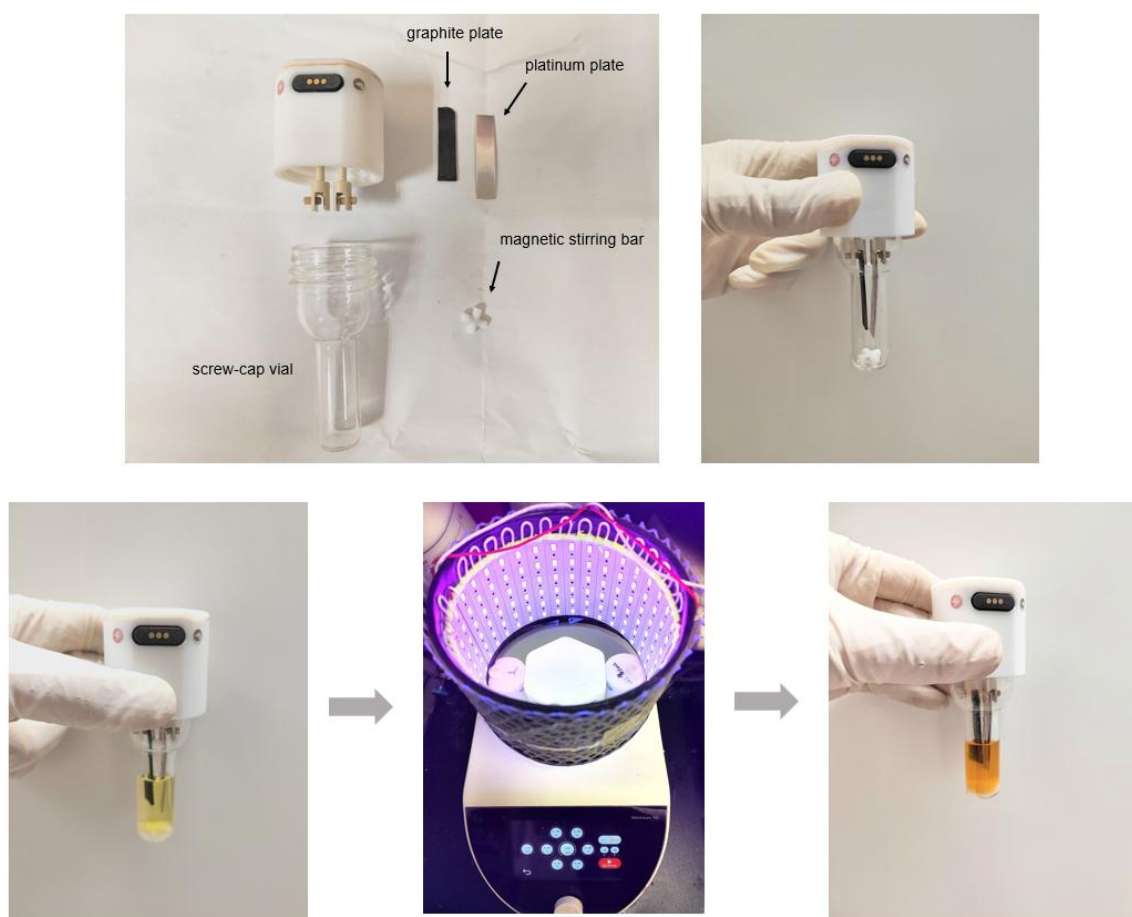

**Figure S1.** Components of the electrolysis setup (top left). Assembled reaction vessel (top right). Reaction before (bottom left), during (bottom middle) and after (bottom right).

## Optimization of reaction conditions

**Table S1.** Screening of metal catalysts.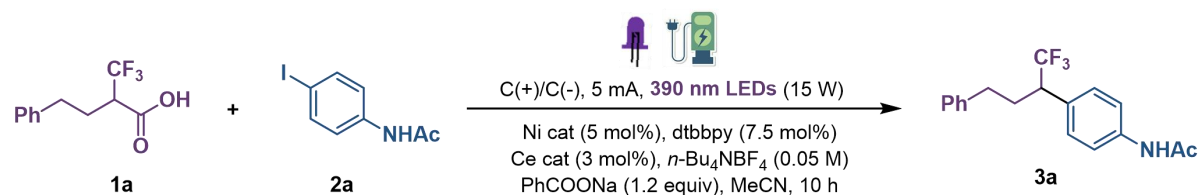

| Entry | Ni cat.                 | Ce cat.                               | Yield (%) |
|-------|-------------------------|---------------------------------------|-----------|
| 1     | NiCl <sub>2</sub> · DME | CeCl <sub>3</sub>                     | 32        |
| 2     | NiCl <sub>2</sub> · DME | Ce(OTf) <sub>3</sub>                  | 21        |
| 3     | NiCl <sub>2</sub> · DME | CeCl <sub>3</sub> · 7H <sub>2</sub> O | 15        |
| 4     | NiCl <sub>2</sub> · DME | Ce(NO <sub>3</sub> ) <sub>3</sub>     | 30        |
| 5     | NiCl <sub>2</sub> · DME | FeCl <sub>3</sub> instead of [Ce]     | < 5       |
| 6     | NiCl <sub>2</sub> · DME | CuCl <sub>2</sub> instead of [Ce]     | n. d      |
| 7     | Ni(COD) <sub>2</sub>    | CeCl <sub>3</sub>                     | < 5       |
| 8     | Ni(COD) <sub>2</sub>    | Ce(NO <sub>3</sub> ) <sub>3</sub>     | < 5       |
| 9     | Ni(COD) <sub>2</sub>    | FeCl <sub>3</sub> instead of [Ce]     | n. d      |
| 10    | Ni(acac) <sub>2</sub>   | CeCl <sub>3</sub>                     | 20        |
| 11    | Ni(acac) <sub>2</sub>   | Ce(NO <sub>3</sub> ) <sub>3</sub>     | 13        |
| 12    | NiBr <sub>2</sub>       | CeCl <sub>3</sub>                     | 29        |
| 13    | NiBr <sub>2</sub>       | Ce(NO <sub>3</sub> ) <sub>3</sub>     | 32        |

An oven-dried screw-cap vial was equipped with a stir bar, a threaded Teflon cap fitted with electrical feedthroughs, a graphite plate anode (2.5 cm \* 0.5 cm), and a graphite plate cathode (2.5 cm \* 0.5 cm). Under nitrogen atmosphere, *n*-Bu<sub>4</sub>NBF<sub>4</sub> (66 mg, 0.10 mmol, 0.5 eq.), sodium benzoate (35 mg, 0.24 mmol, 1.2 eq.), 4-phenyl-2-(trifluoromethyl)butanoic acid (46.4 mg, 0.20 mmol, 1.0 eq.), *N*-(4-iodophenyl)acetamide (62.6 mg, 0.24 mmol, 1.2 eq.), Ce cat. (0.006 mmol, 3 mol%), Ni cat. (0.01 mmol, 5 mol%), and dtbbpy (4.1 mg, 0.015 mmol, 7.5 mol%) were added to this reaction vessel. After that, MeCN (2.0 mL) were added via syringe. The reaction was irradiated with purple LEDs (15 W, 390 nm) under the vessel and electrolysis was initiated at a constant current of 2.0 mA. The temperature was kept at approximately 30°C through the use of a cooling fan. After 10 hours, the photolysis and electrolysis were terminated and the reaction was quenched with 10 mL water, then extracted with DCM (3 x 10 mL). The combined organic phase was dried with anhydrous Na<sub>2</sub>SO<sub>4</sub> and concentrated under vacuum. The crude reaction mixture was filtered through a plug of silica then subjected to GC-MS analysis.

**Table S2.** Screening of electrodes, current and reaction time.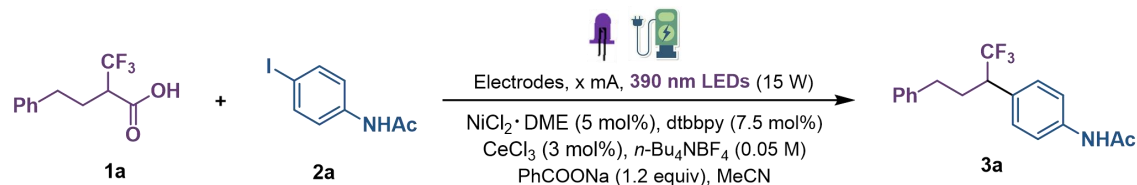

| Entry | Electrodes  | Current and reaction time | Yield (%) |
|-------|-------------|---------------------------|-----------|
| 1     | C(+)/C(-)   | 5 mA, 10 h                | 32        |
| 2     | C(+)/C(-)   | 5 mA, 2 h                 | 11        |
| 3     | C(+)/C(-)   | 5 mA, 12 h                | 30        |
| 4     | C(+)/C(-)   | 2 mA, 24 h                | 28        |
| 5     | C(+)/C(-)   | 2 mA, 10 h                | 35        |
| 6     | C(+)/C(-)   | 2 mA, 3 h                 | 8         |
| 7     | Pt(+)/C(-)  | 5 mA, 2 h                 | < 5       |
| 8     | Pt(+)/C(-)  | 2 mA, 10 h                | 26        |
| 9     | Pt(+)/Pt(-) | 5 mA, 2 h                 | 7         |
| 10    | Pt(+)/Pt(-) | 2 mA, 10 h                | 20        |
| 11    | C(+)/Pt(-)  | 5 mA, 2 h                 | 13        |
| 12    | C(+)/Pt(-)  | 2 mA, 10 h                | 40        |
| 13    | C(+)/Pt(-)  | 2 mA, 5 h                 | 22        |
| 14    | C(+)/Pt(-)  | 2 mA, 12 h                | 39        |

An oven-dried screw-cap vial was equipped with a stir bar, a threaded Teflon cap fitted with electrical feedthroughs, an anode (2.5 cm \* 0.5 cm), and a cathode (2.5 cm \* 0.5 cm). Under nitrogen atmosphere, *n*-Bu<sub>4</sub>NBF<sub>4</sub> (66 mg, 0.10 mmol, 0.5 eq.), sodium benzoate (35 mg, 0.24 mmol, 1.2 eq.), 4-phenyl-2-(trifluoromethyl)butanoic acid (46.4 mg, 0.20 mmol, 1.0 eq.), *N*-(4-iodophenyl)acetamide (62.6 mg, 0.24 mmol, 1.2 eq.), CeCl<sub>3</sub> (1.5 mg, 0.006 mmol, 3 mol%), NiCl<sub>2</sub>·DME (2.2 mg, 0.01 mmol, 5 mol%) and dtbbpy (4.1 mg, 0.015 mmol, 7.5 mol%) were added to this reaction vessel. After that, MeCN (2.0 mL) were added via syringe. The reaction was irradiated with purple LEDs (15 W, 390 nm) under the vessel and electrolysis was initiated at a constant current, The temperature was kept at approximately 30°C through the use of a cooling fan. After the reaction, the photolysis and electrolysis were terminated and the reaction was quenched with 10 mL water, then extracted with DCM (3 x 10 mL). The combined organic phase was dried with anhydrous Na<sub>2</sub>SO<sub>4</sub> and concentrated under vacuum. The crude reaction mixture was filtered through a plug of silica then subjected to GC-MS analysis.

**Table S3.** Screening of additives and solvent.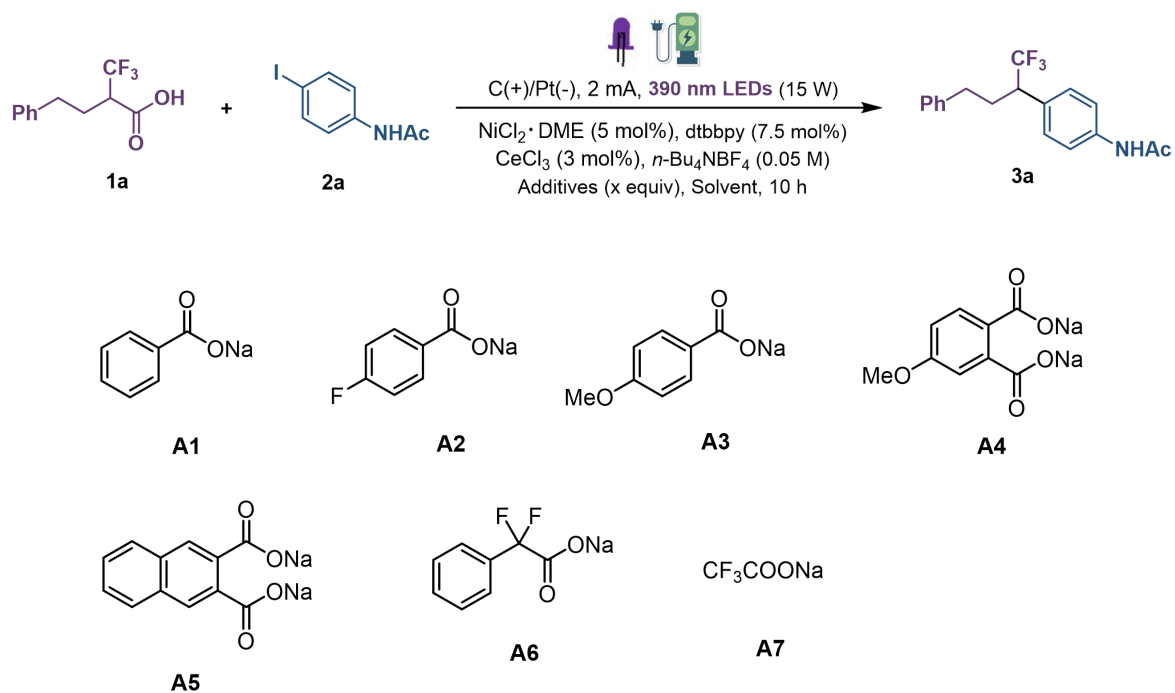

| Entry | Additives             | Solvent                     | Yield (%) |
|-------|-----------------------|-----------------------------|-----------|
| 1     | <b>A1</b> (1.2 equiv) | MeCN                        | 40        |
| 2     | <b>A2</b> (1.2 equiv) | MeCN                        | 28        |
| 3     | <b>A3</b> (1.2 equiv) | MeCN                        | 46        |
| 4     | <b>A4</b> (0.6 equiv) | MeCN                        | 49        |
| 5     | <b>A5</b> (0.6 equiv) | MeCN                        | 41        |
| 6     | <b>A4</b> (1.2 equiv) | MeCN                        | 53        |
| 7     | <b>A6</b> (1.2 equiv) | MeCN                        | 10        |
| 8     | <b>A7</b> (1.2 equiv) | MeCN                        | 7         |
| 9     | <b>A3</b> (1.2 equiv) | DMSO                        | 54        |
| 10    | <b>A4</b> (1.2 equiv) | DMSO                        | 57        |
| 11    | <b>A5</b> (1.2 equiv) | DMSO                        | 40        |
| 12    | <b>A3</b> (1.2 equiv) | DMA                         | 17        |
| 13    | <b>A4</b> (1.2 equiv) | DMA                         | 15        |
| 14    | <b>A5</b> (1.2 equiv) | DMA                         | 20        |
| 15    | <b>A4</b> (1.2 equiv) | MeCN/DMSO = 1/1             | 54        |
| 16    | <b>A4</b> (1.2 equiv) | MeCN/DMSO = 9/1             | 60        |
| 17    | <b>A4</b> (1.2 equiv) | MeCN/H <sub>2</sub> O = 9/1 | trace     |
| 18    | <b>A3</b> (1.2 equiv) | MeCN/DMSO = 9/1             | 42        |

An oven-dried screw-cap vial was equipped with a stir bar, a threaded Teflon cap fitted with electrical feedthroughs, a graphite plate anode (2.5 cm \* 0.5 cm), and a platinum plate cathode (2.5 cm \* 0.5 cm). Under nitrogen atmosphere, *n*-Bu<sub>4</sub>NBF<sub>4</sub> (66 mg, 0.10 mmol, 0.5 eq.), additives (0.24 mmol, 1.2 eq.), 4-phenyl-2-(trifluoromethyl)butanoic acid (46.4 mg, 0.20 mmol, 1.0 eq.), *N*-(4-iodophenyl)acetamide (62.6 mg, 0.24 mmol, 1.2 eq.), CeCl<sub>3</sub> (1.5 mg, 0.006 mmol, 3 mol%), NiCl<sub>2</sub> DME (2.2 mg, 0.01 mmol, 5 mol%), and dtbbpy (4.1 mg, 0.015 mmol, 7.5 mol%) were added to this reaction vessel. After that, the solvent (2.0 mL) were added via syringe. The reaction was irradiated with purple LEDs (15 W, 390 nm) under the vessel and electrolysis was initiated at a constant current of 2.0 mA, The temperature was kept at approximately 30°C through the use of a cooling fan. After 10 hours, the photolysis and electrolysis were terminated and the reaction was quenched with 10 mL water, then extracted with DCM (3 x 10 mL). The combined organic phase was dried with anhydrous Na<sub>2</sub>SO<sub>4</sub> and concentrated under vacuum. The crude reaction mixture was filtered through a plug of silica then subjected to GC-MS analysis.

**Table S4.** Screening of chiral ligands.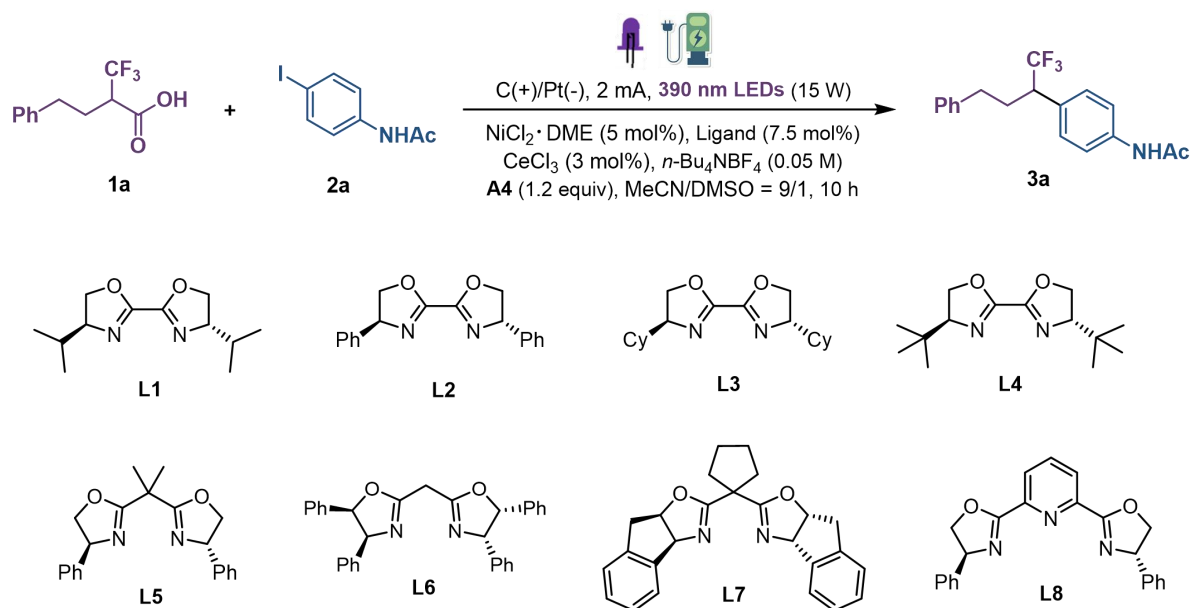

| Entry | Ligands   | e. r.   | Yield (%) |
|-------|-----------|---------|-----------|
| 1     | <b>L1</b> | 93 : 7  | 72        |
| 2     | <b>L2</b> | 55 : 15 | 47        |
| 3     | <b>L3</b> | 91 : 9  | 65        |
| 4     | <b>L4</b> | 93 : 7  | 70        |
| 5     | <b>L5</b> | 61 : 39 | 64        |
| 6     | <b>L6</b> | 76 : 24 | 14        |
| 7     | <b>L7</b> | -       | < 5       |
| 8     | <b>L8</b> | -       | < 5       |

An oven-dried screw-cap vial was equipped with a stir bar, a threaded Teflon cap fitted with electrical feedthroughs, a graphite plate anode (2.5 cm \* 0.5 cm), and a platinum plate cathode (2.5 cm \* 0.5 cm). Under nitrogen atmosphere, *n*-Bu<sub>4</sub>NBF<sub>4</sub> (66 mg, 0.10 mmol, 0.5 eq.), sodium phthalate (**A4**) (58 mg, 0.24 mmol, 1.2 eq.), 4-phenyl-2-(trifluoromethyl)butanoic acid (46.4 mg, 0.20 mmol, 1.0 eq.), *N*-(4-iodophenyl)acetamide (62.6 mg, 0.24 mmol, 1.2 eq.), CeCl<sub>3</sub> (1.5 mg, 0.006 mmol, 3 mol%), NiCl<sub>2</sub> DME (2.2 mg, 0.01 mmol, 5 mol%), and chiral ligand (**L1-L8**) (0.015 mmol, 7.5 mol%) were added to this reaction vessel. After that, the mixture of MeCN and DMSO (9:1(v:v), 2.0 mL) were added via syringe. The reaction was irradiated with purple LEDs (15 W, 390 nm) under the vessel and electrolysis was initiated at a constant current of 2.0 mA. The temperature was kept at approximately 30°C through the use of a cooling fan. After 10 hours, the photolysis and electrolysis were terminated and the reaction was quenched with 10 mL water, then extracted with DCM (3 x 10 mL). The combined organic phase was dried with anhydrous

Na<sub>2</sub>SO<sub>4</sub> and concentrated under vacuum. The crude reaction mixture was filtered through a plug of silica then subjected to GC-MS analysis. The enantioselectivity was determined via HPLC analysis with chiral columns.



**Table S5.** Variation from standard conditions.

$\text{C}(+)/\text{Pt}(-)$ , 2 mA, 390 nm LEDs (15 W)  
 $\text{NiCl}_2 \cdot \text{DME}$  (5 mol%), **L1** (7.5 mol%)  
 $\text{CeCl}_3$  (3 mol%),  $n\text{-Bu}_4\text{NBF}_4$  (0.05 M)  
**A4** (1.2 equiv), MeCN/DMSO = 9/1, 10 h

**1a**

**2a**

**3a**

**L1**, R = *i*-Pr  
**L2**, R = Ph  
**L3**, R = Cy  
**L4**, R = *t*-Bu

**L5**

**L6**

**L7**

**L8**

**A4**

| entry | deviation from standard                                     | Yield of <b>3a</b> (%) | e. r.        |
|-------|-------------------------------------------------------------|------------------------|--------------|
| 1     | None                                                        | 72                     | 93:7         |
| 2     | <b>L2-L6</b> instead of <b>L1</b>                           | 14-70                  | 55:15 - 93:7 |
| 3     | <b>L7</b> or <b>L8</b> in stead of <b>L1</b>                | < 5                    | -            |
| 4     | C(+)/C(-) instead of C(+)/Pt(-)                             | 60                     | 93:7         |
| 5     | Pt(+)/Pt(-) instead of C(+)/Pt(-)                           | 58                     | 93:7         |
| 6     | 5 mA or 1 mA instead of 2 mA                                | 49-56                  | 93:7         |
| 7     | FeCl <sub>3</sub> instead of CeCl <sub>3</sub>              | 16                     | 92:8         |
| 8     | CuCl <sub>2</sub> instead of CeCl <sub>3</sub>              | n. d                   | -            |
| 9     | Pure MeCN as solvent                                        | 61                     | 81:19        |
| 10    | K <sub>2</sub> CO <sub>3</sub> or KOAc instead of <b>A4</b> | 34-53                  | 90:10        |
| 11    | no <b>A4</b>                                                | 11                     | 92:8         |
| 12    | 1.0 equiv KOAc and 5 mol% <b>A4</b> instead of <b>A4</b>    | 58                     | 93:7         |
| 13    | no current                                                  | 0                      | -            |
| 14    | no purple LEDs or no CeCl <sub>3</sub>                      | 0                      | -            |
| 15    | no Ligand                                                   | 27                     | 50:50        |

## Preparation of the substrates (Method 1)

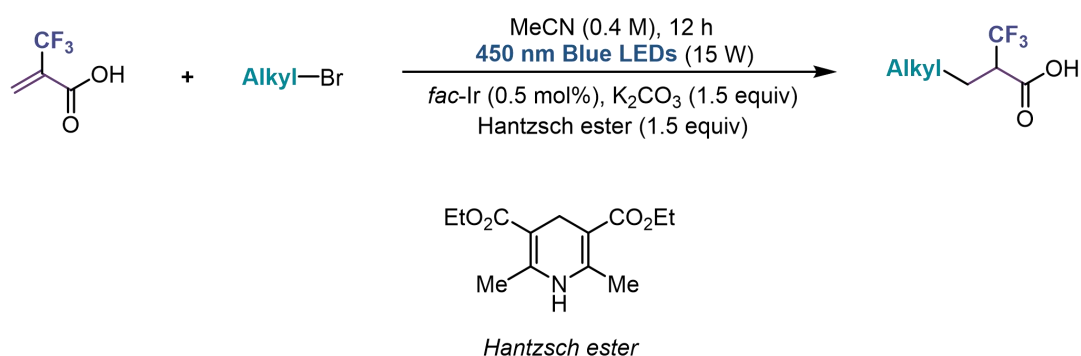Scheme S2. Preparation of  $\alpha$ -CF<sub>3</sub> carboxylic acids.

A reaction tube equipped with a magnetic stir bar was charged with *fac*-Ir(ppy)<sub>3</sub> (6.5 mg, 0.5 mol %), Hantzsch ester 1 (675 mg, 3.0 mmol, 1.5 equiv), 3,3,3-trifluoropropionic acid (280 mg, 2.0 mmol, 1.0 equiv), alkyl bromide (3.0 mmol, 1.5 equiv) K<sub>2</sub>CO<sub>3</sub> (3.0 mmol, 1.5 equiv) and MeCN (5 mL) under nitrogen atmosphere. The mixture was stirred under irradiation of 15 W blue LEDs at room temperature for 12 hours. Then the mixture was diluted with H<sub>2</sub>O and the resulting mixture was extracted with DCM for 3 times. The combined organic layers were washed with brine, dried over Na<sub>2</sub>SO<sub>4</sub>, filtered, and concentrated under reduced pressure. The residue was purified by chromatography on silica gel to afford corresponding products, which was characterized by GC-MS analysis, <sup>1</sup>H NMR, <sup>13</sup>C NMR and <sup>19</sup>F NMR spectroscopy.

4-phenyl-2-(trifluoromethyl)butanoic acid (**S1**)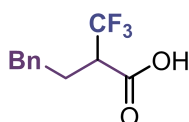

The title compound was purified with silica gel chromatography (ethyl acetate: petroleum ether, 1:30 (v:v)) as a colorless oil (90% yield).

$R_f$  = 0.25 (ethyl acetate: petroleum ether, 1:5 (v:v)).

**NMR Spectroscopy:**

<sup>1</sup>H NMR (400 MHz, Chloroform-*d*, 298 K)  $\delta$  7.39 - 7.16 (m, 5H), 3.25 - 3.06 (m, 1H), 2.88 - 2.75 (m, 1H), 2.75 - 2.57 (m, 1H), 2.38 - 2.19 (m, 1H), 2.19 - 2.07 (m, 1H).

<sup>13</sup>C NMR (101 MHz, Chloroform-*d*, 298 K)  $\delta$  171.55, 139.86, 128.85, 128.61, 126.70, 123.30 (q,  $J$  = 281.0 Hz), 49.80 (q,  $J$  = 27.0 Hz), 32.84, 29.86.

<sup>19</sup>F NMR (376 MHz, Chloroform-*d*, 298 K)  $\delta$  -68.03 (d,  $J$  = 8.3 Hz).

The spectra data are consistent with those reported in literature.

**GC-MS:** 232.

4-(4-(*tert*-butyl)phenyl)-2-(trifluoromethyl)butanoic acid (**S2**)

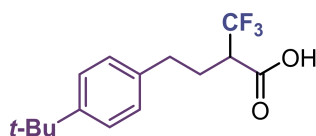

The title compound was purified with silica gel chromatography (ethyl acetate: petroleum ether, 1:30 (v:v)) as a colorless oil (84% yield).

$R_f$  = 0.28 (ethyl acetate: petroleum ether, 1:5 (v:v)).

**NMR Spectroscopy:**

$^1\text{H NMR}$  (400 MHz, Chloroform-*d*, 298 K)  $\delta$  11.01 (br, 1H), 7.31 (d,  $J$  = 8.3 Hz, 2H), 7.13 (d,  $J$  = 8.3 Hz, 2H), 3.23 - 3.09 (m, 1H), 2.83 - 2.72 (m, 1H), 2.70 - 2.58 (m, 1H), 2.34 - 2.20 (m, 1H), 2.16 - 2.03 (m, 1H), 1.30 (s, 9H).

$^{13}\text{C NMR}$  (101 MHz, Chloroform-*d*, 298 K)  $\delta$  165.48, 149.29, 137.15, 128.19, 125.55, 125.09 (q,  $J$  = 281.0 Hz), 49.97 (q,  $J$  = 27.2 Hz), 34.43, 32.33, 31.37, 27.99.

$^{19}\text{F NMR}$  (376 MHz, Chloroform-*d*, 298 K)  $\delta$  -67.94 (d,  $J$  = 8.5 Hz).

**GC-MS:** 288.

**HRMS (ESI)  $m/z$   $[M+H]^+$ :** Calculated for  $\text{C}_{15}\text{H}_{20}\text{F}_3\text{O}_2^+$ : 289.1410. Found: 289.1412.

4-(4-(trifluoromethoxy)phenyl)-2-(trifluoromethyl)butanoic acid (**S3**)

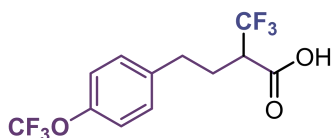

The title compound was purified with silica gel chromatography (ethyl acetate: petroleum ether, 1:30 (v:v)) as a colorless oil (80% yield).

$R_f$  = 0.25 (ethyl acetate: petroleum ether, 1:5 (v:v)).

**NMR Spectroscopy:**

$^1\text{H NMR}$  (400 MHz, Chloroform-*d*, 298 K)  $\delta$  8.33 (br, 1H), 7.43 - 7.03 (m, 4H), 3.21 - 3.05 (m, 2H), 2.81 - 2.64 (m, 2H), 2.26 - 2.09 (m, 1H).

$^{13}\text{C NMR}$  (101 MHz, Chloroform-*d*, 298 K)  $\delta$  148.02, 138.54, 129.83, 128.56, 124.23 (q,  $J$  = 281.0 Hz), 121.26, 120.15 (q,  $J$  = 278.0 Hz), 49.45 (q,  $J$  = 27.6 Hz), 32.04, 27.73.

$^{19}\text{F NMR}$  (376 MHz, Chloroform-*d*, 298 K)  $\delta$  -57.94, -67.94 (d,  $J$  = 8.4 Hz).

**GC-MS:** 316.

**HRMS (ESI)  $m/z$   $[M+H]^+$ :** Calculated for  $\text{C}_{12}\text{H}_{11}\text{F}_6\text{O}_3^+$ : 317.0607. Found: 317.0601.

4-(3-(benzyloxy)phenyl)-2-(trifluoromethyl)butanoic acid (**S4**)

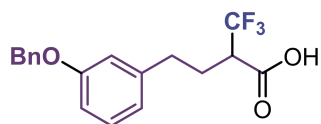

The title compound was purified with silica gel chromatography (ethyl acetate: petroleum ether, 1:20 (v:v)) as a colorless oil (81% yield).

$R_f$  = 0.25 (ethyl acetate: petroleum ether, 1:5 (v:v)).

**NMR Spectroscopy:**

**$^1\text{H}$  NMR** (400 MHz, Chloroform-*d*, 298 K)  $\delta$  10.23 (br, 1H), 7.53 - 7.34 (m, 5H), 7.33 - 7.23 (m, 1H), 6.94 - 6.83 (m, 3H), 5.10 (s, 2H), 3.29 - 3.15 (m, 1H), 2.90 - 2.78 (m, 1H), 2.77 - 2.65 (m, 1H), 2.40 - 2.26 (m, 1H), 2.26 - 2.12 (m, 1H).

**$^{13}\text{C}$  NMR** (101 MHz, Chloroform-*d*, 298 K)  $\delta$  173.42, 159.19, 141.38, 137.09, 129.89, 128.75, 128.16, 127.70, 124.63 (q,  $J$  = 280.2 Hz), 121.31, 115.48, 113.00, 70.15, 49.52 (q,  $J$  = 27.7 Hz), 32.79, 27.76.

**$^{19}\text{F}$  NMR** (376 MHz, Chloroform-*d*, 298 K)  $\delta$  -67.68 (d,  $J$  = 8.1 Hz).

**GC-MS:** 338.

**HRMS (ESI)  $m/z$   $[M+H]^+$ :** Calculated for  $\text{C}_{18}\text{H}_{18}\text{F}_3\text{O}_3^+$ : 339.1203. Found: 339.1200.

4-(naphthalen-1-yl)-2-(trifluoromethyl)butanoic acid (**S5**)

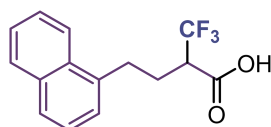

The title compound was purified with silica gel chromatography (ethyl acetate: petroleum ether, 1:30 (v:v)) as a colorless oil (65% yield).

$R_f$  = 0.30 (ethyl acetate: petroleum ether, 1:5 (v:v)).

**NMR Spectroscopy:**

**$^1\text{H}$  NMR** (400 MHz, Chloroform-*d*, 298 K)  $\delta$  10.28 (br, 1H), 8.03 (d,  $J$  = 8.3 Hz, 1H), 7.89 (d,  $J$  = 8.0 Hz, 1H), 7.77 (d,  $J$  = 8.1 Hz, 1H), 7.64 - 7.31 (m, 4H), 3.42 - 3.24 (m, 2H), 3.22 - 3.11 (m, 1H), 2.54 - 2.38 (m, 1H), 2.38 - 2.24 (m, 1H).

**$^{13}\text{C}$  NMR** (101 MHz, Chloroform-*d*, 298 K)  $\delta$  165.08, 135.99, 134.11, 131.71, 129.08, 127.60, 126.54, 126.39, 125.85, 125.63, 124.41 (q,  $J$  = 280.0 Hz), 123.35, 49.99 (q,  $J$  = 27.7 Hz), 30.20, 27.17.

**$^{19}\text{F}$  NMR** (376 MHz, Chloroform-*d*, 298 K)  $\delta$  -67.55 (d,  $J$  = 8.4 Hz).

**GC-MS:** 282.

**HRMS (ESI)  $m/z$   $[M+H]^+$ :** Calculated for  $\text{C}_{15}\text{H}_{14}\text{F}_3\text{O}_2^+$ : 283.0940. Found: 283.0939.

4-(2-bromo-5-methoxyphenyl)-2-(trifluoromethyl)butanoic acid (**S6**)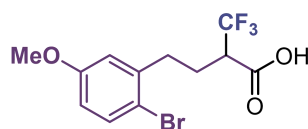

The title compound was purified with silica gel chromatography (ethyl acetate: petroleum ether, 1:20 (v:v)) as a yellow oil (72% yield).

$R_f$  = 0.25 (ethyl acetate: petroleum ether, 1:5 (v:v)).

**NMR Spectroscopy:**

$^1\text{H NMR}$  (400 MHz, Chloroform-*d*, 298 K)  $\delta$  11.10 (br, 1H), 7.38 (d,  $J$  = 8.4 Hz, 1H), 6.77 - 6.71 (m, 2H), 3.81 (s, 2H), 3.19 - 3.06 (m, 1H), 2.90 - 2.69 (m, 1H), 2.12 - 1.93 (m, 1H).

$^{13}\text{C NMR}$  (101 MHz, Chloroform-*d*, 298 K)  $\delta$  174.70, 159.52, 140.04, 133.26, 125.11 (q,  $J$  = 278.1 Hz), 116.96, 115.65, 115.33, 55.30, 46.05 (q,  $J$  = 27.1 Hz), 33.01, 25.13.

$^{19}\text{F NMR}$  (376 MHz, Chloroform-*d*, 298 K)  $\delta$  -68.26 (d,  $J$  = 8.2 Hz).

**GC-MS:** 340.

**HRMS (ESI)  $m/z$   $[M+H]^+$ :** Calculated for  $\text{C}_{12}\text{H}_{13}\text{BrF}_3\text{O}_3^+$ : 340.9995. Found: 340.9991.

2-(trifluoromethyl)-4-(3-(trifluoromethyl)phenyl)butanoic acid (**S7**)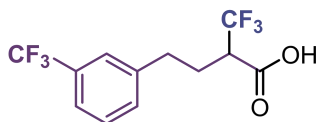

The title compound was purified with silica gel chromatography (ethyl acetate: petroleum ether, 1:30 (v:v)) as a colorless oil (81% yield).

$R_f$  = 0.2 (ethyl acetate: petroleum ether, 1:10 (v:v)).

**NMR Spectroscopy:**

$^1\text{H NMR}$  (400 MHz, Chloroform-*d*, 298 K)  $\delta$  10.70 (br, 1H), 7.59 - 7.33 (m, 4H), 3.21 - 3.58 (m, 1H), 2.97 - 2.67 (m, 2H), 2.36 - 2.07 (m, 2H).

$^{13}\text{C NMR}$  (101 MHz, Chloroform-*d*, 298 K)  $\delta$  162.18, 140.78, 131.95, 129.20, 127.14 (q,  $J$  = 279.2 Hz), 125.22, 124.10 (q,  $J$  = 281.1 Hz), 123.61, 122.09 (q,  $J$  = 27.6 Hz), 45.05 (q,  $J$  = 28.0 Hz), 32.63, 27.65.

$^{19}\text{F NMR}$  (376 MHz, Chloroform-*d*, 298 K)  $\delta$  -62.56, -67.84 (d,  $J$  = 7.7 Hz).

**GC-MS:** 300.

**HRMS (ESI)  $m/z$   $[M+H]^+$ :** Calculated for  $\text{C}_{12}\text{H}_{11}\text{F}_6\text{O}_2^+$ : 301.0658. Found: 301.0660.

4-([1,1'-biphenyl]-4-yl)-2-(trifluoromethyl)butanoic acid (**S8**)

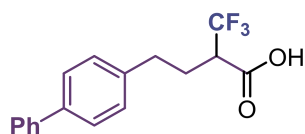

The title compound was purified with silica gel chromatography (ethyl acetate: petroleum ether, 1:20 (v:v)) as a colorless oil (75% yield).

$R_f$  = 0.3 (ethyl acetate: petroleum ether, 1:5 (v:v)).

**NMR Spectroscopy:**

**$^1\text{H}$  NMR** (400 MHz, Chloroform-*d*, 298 K)  $\delta$  10.21 (br, 1H), 7.59 (dd,  $J$  = 14.2, 7.9 Hz, 4H), 7.50 - 7.41 (m, 2H), 7.39 - 7.33 (m, 1H), 7.33 - 7.27 (m, 2H), 3.30 - 3.16 (m, 1H), 2.93 - 2.82 (m, 1H), 2.81 - 2.69 (m, 1H), 2.41 - 2.28 (m, 1H), 2.28 - 2.15 (m, 1H).

**$^{13}\text{C}$  NMR** (101 MHz, Chloroform-*d*, 298 K)  $\delta$  173.04, 140.91, 139.71, 138.81, 129.03, 128.90, 127.50, 127.36, 127.13, 124.62 (q,  $J$  = 280.6 Hz), 49.55 (q,  $J$  = 28.1 Hz), 32.41, 27.84.

**$^{19}\text{F}$  NMR** (376 MHz, Chloroform-*d*, 298 K)  $\delta$  -67.72 (d,  $J$  = 8.0 Hz).

**GC-MS:** 308.

**HRMS (ESI)  $m/z$   $[M+H]^+$ :** Calculated for  $\text{C}_{17}\text{H}_{16}\text{F}_3\text{O}_2^+$ : 309.1097. Found: 309.1092.

4-(4-acetylphenyl)-2-(trifluoromethyl)butanoic acid (**S9**)

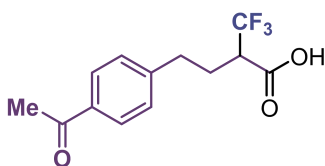

The title compound was purified with silica gel chromatography (ethyl acetate: petroleum ether, 1:20 (v:v)) as a colorless oil (83% yield).

$R_f$  = 0.2 (ethyl acetate: petroleum ether, 1:5 (v:v)).

**NMR Spectroscopy:**

**$^1\text{H}$  NMR** (400 MHz, Chloroform-*d*, 298 K)  $\delta$  8.92 (br, 1H), 7.90 (d,  $J$  = 8.3 Hz, 2H), 7.29 (d,  $J$  = 8.2 Hz, 2H), 3.20 - 3.07 (m, 1H), 2.91 - 2.80 (m, 1H), 2.78 - 2.69 (m, 1H), 2.59 (s, 3H), 2.35 - 2.23 (m, 1H), 2.19 - 2.07 (m, 1H).

**$^{13}\text{C}$  NMR** (101 MHz, Chloroform-*d*, 298 K)  $\delta$  198.93, 171.36, 145.82, 135.59, 129.02, 128.84, 124.54 (q,  $J$  = 280.1 Hz), 49.41 (q,  $J$  = 28.4, 28.0 Hz), 32.72, 27.40, 26.57.

**$^{19}\text{F}$  NMR** (376 MHz, Chloroform-*d*, 298 K)  $\delta$  -67.85 (d,  $J$  = 8.5 Hz).

**GC-MS:** 274.

**HRMS (ESI)  $m/z$   $[M+H]^+$ :** Calculated for  $\text{C}_{13}\text{H}_{14}\text{F}_3\text{O}_3^+$ : 275.0890. Found: 275.0881.

4-(4-(2-(((1R,3R,4S)-4-isopropyl-3-methylcyclohexyl)oxy)-2-oxoethyl)phenyl)-2-(trifluoromethyl)butanoic acid (**S10**)

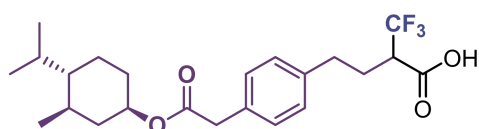

The title compound was purified with silica gel chromatography (ethyl acetate: petroleum ether, 1:30 (v:v)) as a colorless oil (83% yield).

$R_f$  = 0.3 (ethyl acetate: petroleum ether, 1:5 (v:v)).

#### NMR Spectroscopy:

**$^1\text{H}$  NMR** (400 MHz, Chloroform-*d*, 298 K)  $\delta$  7.44 (br, 1H), 7.24 - 7.11 (m, 3H), 3.58 (s, 2H), 3.20 - 3.06 (m, 1H), 2.83 - 2.73 (m, 1H), 2.71 - 2.59 (m, 1H), 2.30 - 2.18 (m, 1H), 2.17 - 2.05 (m, 1H), 1.96 (d,  $J$  = 12.2 Hz, 1H), 1.77 - 1.60 (m, 3H), 1.49 - 1.30 (m, 2H), 1.05 - 0.93 (m, 2H), 0.91 - 0.78 (m, 8H), 0.68 (d,  $J$  = 6.9 Hz, 3H).

**$^{13}\text{C}$  NMR** (101 MHz, Chloroform-*d*, 298 K)  $\delta$  173.51, 171.79, 138.44, 132.67, 129.58, 128.71, 124.58 (q,  $J$  = 279.1 Hz), 75.09, 49.23 (q,  $J$  = 28.0 Hz), 47.10, 41.45, 40.83, 34.30, 32.35, 31.44, 27.80, 26.24, 23.49, 22.06, 20.73, 16.31.

**$^{19}\text{F}$  NMR** (376 MHz, Chloroform-*d*, 298 K)  $\delta$  -67.88 (d,  $J$  = 8.2 Hz).

**HRMS (ESI)  $m/z$   $[M+H]^+$** : Calculated for  $\text{C}_{23}\text{H}_{32}\text{F}_3\text{O}_4^+$ : 429.2247. Found: 429.2240.

4-(4-(2-oxo-2-(((R)-2,5,7,8-tetramethyl-2-((4R,8R)-4,8,12-trimethyltridecyl)chroman-6-yl)oxy)ethyl)phenyl)-2-(trifluoromethyl)butanoic acid (**S11**)

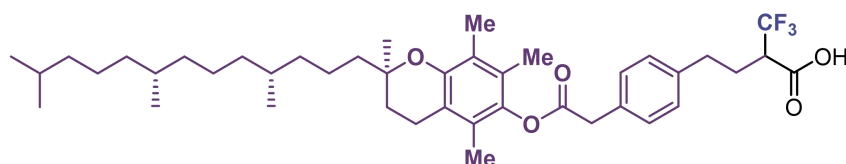

The title compound was purified with silica gel chromatography (ethyl acetate: petroleum ether, 1:20 (v:v)) as a colorless oil (70% yield).

$R_f$  = 0.35 (ethyl acetate: petroleum ether, 1:3 (v:v)).

#### NMR Spectroscopy:

**$^1\text{H}$  NMR** (400 MHz, Chloroform-*d*, 298 K)  $\delta$  8.82 (br, 1H), 7.40 (d,  $J$  = 7.7 Hz, 2H), 7.22 (d,  $J$  = 7.7 Hz, 2H), 3.90 (s, 2H), 3.22 - 3.08 (m, 1H), 2.90 - 2.79 (m, 1H), 2.76 - 2.64 (m, 1H), 2.58 (t,  $J$  = 6.9 Hz, 2H), 2.37 - 2.23 (m, 1H), 2.22 - 2.11 (m, 4H), 1.92 (s, 3H), 1.87 (s, 3H), 1.84 - 1.72 (m, 2H), 1.44 - 1.08 (m, 21H), 0.99 - 0.82 (m, 12H).

**$^{13}\text{C}$  NMR** (101 MHz, Chloroform-*d*, 298 K)  $\delta$  172.38, 170.62, 149.58, 140.58, 138.85, 132.18, 129.95, 128.92, 126.78, 125.02, 124.62 (q,  $J$  = 278.4 Hz), 123.23, 117.55, 75.19, 49.34 (q,  $J$  = 27.8 Hz), 41.08, 39.51, 37.55, 37.42, 32.92, 32.82, 32.37, 31.22, 28.10, 27.84, 24.93, 24.57, 22.84, 22.75, 21.13, 20.67, 19.88, 19.77, 12.84, 11.97, 11.88.

$^{19}\text{F}$  NMR (376 MHz, Chloroform-*d*, 298 K)  $\delta$  -67.79 (d,  $J$  = 8.3 Hz).

HRMS (ESI)  $m/z$   $[\text{M}+\text{H}]^+$ : Calculated for  $\text{C}_{42}\text{H}_{62}\text{F}_3\text{O}_5^+$ : 703.4544. Found: 703.4539.

### Preparation of the substrates (Method 2) <sup>[1, 2]</sup>

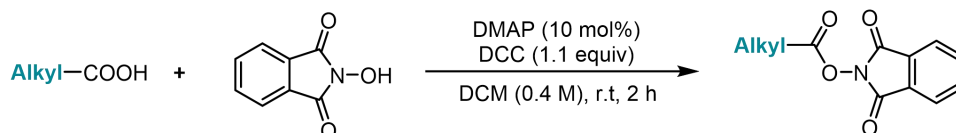

A reaction tube equipped with a magnetic stir bar was charged with alkyl carboxylic acid (4 mmol, 1.0 equiv), *N*-hydroxyphthalimide (4.4 mmol, 1.1 equiv), DMAP (280 mg, 0.4 mmol, 10 mol%) and DCM (5 mL) under nitrogen atmosphere. Then, a solution of DCC (4.4 mmol) in 5 mL DCM was added slowly at room temperature. The mixture was stirred at room temperature for 2 hours. The white precipitate was filtered off and the solution was concentrated on a rotary evaporator. The residue was purified by chromatography on silica gel to afford corresponding products, which was characterized by  $^1\text{H}$  NMR and  $^{13}\text{C}$  NMR spectroscopy.

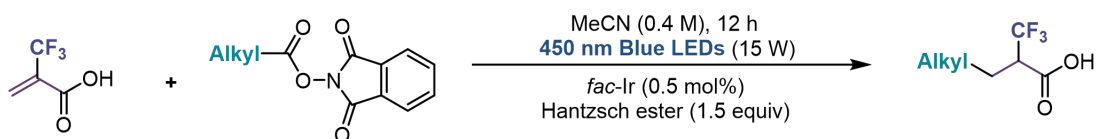

A reaction tube equipped with a magnetic stir bar was charged with *fac*-Ir(ppy)<sub>3</sub> (6.5 mg, 0.5 mol %), Hantzsch ester 1 (675 mg, 3.0 mmol, 1.5 equiv), 3,3,3-trifluoropropionic acid (280 mg, 2.0 mmol, 1.0 equiv), redox-active esters (3.0 mmol, 1.5 equiv) and MeCN (5 mL) under nitrogen atmosphere. The mixture was stirred under irradiation of 15 W blue LEDs at room temperature for 12 hours. Then the mixture was diluted with H<sub>2</sub>O and the resulting mixture was extracted with DCM for 3 times. The combined organic layers were washed with brine, dried over Na<sub>2</sub>SO<sub>4</sub>, filtered, and concentrated under reduced pressure. The residue was purified by chromatography on silica gel to afford corresponding products, which was characterized by GC-MS analysis,  $^1\text{H}$  NMR,  $^{13}\text{C}$  NMR and  $^{19}\text{F}$  NMR spectroscopy.

### 1,3-dioxoisindolin-2-yl 5-(2,5-dimethylphenoxy)-2,2-dimethylpentanoate (**S12**)

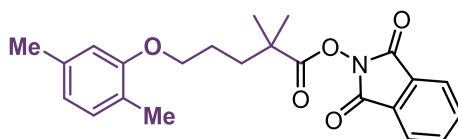

The title compound was purified with silica gel chromatography (ethyl acetate: petroleum ether,



1:20 (v:v)) as a colorless oil (90% yield).

$R_f$  = 0.35 (ethyl acetate: petroleum ether, 1:3 (v:v)).

#### NMR Spectroscopy:

$^1\text{H NMR}$  (400 MHz, Chloroform-*d*, 298 K)  $\delta$  7.91 - 7.84 (m, 2H), 7.82 - 7.74 (m, 2H), 7.00 (d,  $J$  = 6.0 Hz, 1H), 6.68 - 6.59 (m, 2H), 4.06 - 3.95 (m, 2H), 2.31 (s, 3H), 2.19 (s, 3H), 2.02 - 1.87 (m, 4H), 1.45 (s, 6H).

$^{13}\text{C NMR}$  (101 MHz, Chloroform-*d*, 298 K)  $\delta$  173.87, 162.20, 157.06, 136.58, 134.78, 130.36, 129.15, 123.97, 123.70, 120.79, 112.10, 67.82, 42.06, 37.48, 25.22, 25.08, 21.48, 15.87.

**HRMS (ESI)  $m/z$   $[M+H]^+$ :** Calculated for  $\text{C}_{23}\text{H}_{26}\text{NO}_5^+$ : 396.1805. Found: 396.1800.

7-(2,5-dimethylphenoxy)-4,4-dimethyl-2-(trifluoromethyl)heptanoic acid (**S13**)

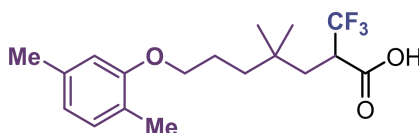

The title compound was purified with silica gel chromatography (ethyl acetate: petroleum ether, 1:30 (v:v)) as a colorless oil (73% yield).

$R_f$  = 0.35 (ethyl acetate: petroleum ether, 1:5 (v:v)).

#### NMR Spectroscopy:

$^1\text{H NMR}$  (400 MHz, Chloroform-*d*, 298 K)  $\delta$  9.50 (br, 1H), 7.00 - 6.94 (m, 1H), 6.72 - 6.68 (m, 1H), 6.65 (d,  $J$  = 2.4 Hz, 1H), 3.96 (t,  $J$  = 5.6 Hz, 2H), 3.30 - 3.21 (m, 3H), 2.30 (s, 3H), 2.18 (s, 3H), 1.93 - 1.85 (m, 1H), 1.80 - 1.71 (m, 1H), 1.71 - 1.59 (m, 2H), 1.40 - 1.24 (m, 2H), 0.98 (s, 3H), 0.93 (s, 3H).

$^{13}\text{C NMR}$  (101 MHz, Chloroform-*d*, 298 K)  $\delta$  174.53, 157.42, 137.21, 130.45, 124.92, 124.21 (q,  $J$  = 278.0 Hz), 121.82, 113.17, 69.90, 46.90 (q,  $J$  = 26.9 Hz), 39.59, 37.71, 32.61, 29.38, 24.75, 21.63, 15.87.

$^{19}\text{F NMR}$  (376 MHz, Chloroform-*d*, 298 K)  $\delta$  -67.52 (d,  $J$  = 8.2 Hz).

**HRMS (ESI)  $m/z$   $[M+H]^+$ :** Calculated for  $\text{C}_{18}\text{H}_{26}\text{F}_3\text{O}_3^+$ : 347.1829. Found: 347.1833.

1,3-dioxoisindolin-2-yl 2-(1-(4-chlorobenzoyl)-5-methoxy-2-methyl-1H-indol-3-yl)acetate (**S14**)

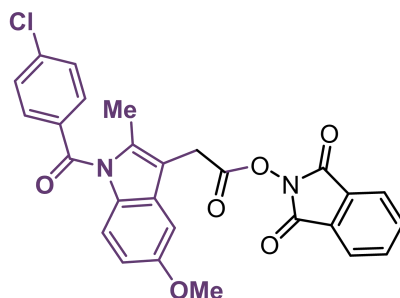

The title compound was purified with silica gel chromatography (ethyl acetate: petroleum ether, 1:20 (v:v)) as a colorless oil (87% yield).

$R_f$  = 0.45 (ethyl acetate: petroleum ether, 1:2 (v:v)).

#### NMR Spectroscopy:

$^1\text{H NMR}$  (400 MHz, Chloroform-*d*, 298 K)  $\delta$  7.94 - 7.89 (m, 2H), 7.67 (d,  $J$  = 8.5 Hz, 2H), 7.46 (d,  $J$  = 8.6 Hz, 2H), 7.42 - 7.31 (m, 1H), 7.02 (d,  $J$  = 2.5 Hz, 1H), 6.92 (d,  $J$  = 9.0 Hz, 1H), 6.74 - 6.60 (m, 2H), 3.88 (s, 3H), 2.41 (s, 3H), 2.03 (s, 2H).

$^{13}\text{C NMR}$  (101 MHz, Chloroform-*d*, 298 K)  $\delta$  163.81, 162.52, 161.73, 156.25, 152.00, 139.62, 136.24, 134.93, 134.82, 131.40, 131.32, 129.27, 129.17, 124.11, 124.06, 116.82, 112.30, 55.82, 29.04, 27.27.

**HRMS (ESI)  $m/z$   $[M+H]^+$ :** Calculated for  $\text{C}_{27}\text{H}_{20}^{35}\text{ClN}_2\text{O}_6^+$ : 503.1004. Found: 503.1010.

4-(1-(4-chlorobenzoyl)-5-methoxy-2-methyl-1H-indol-3-yl)-2-(trifluoromethyl)butanoic acid (**S15**)

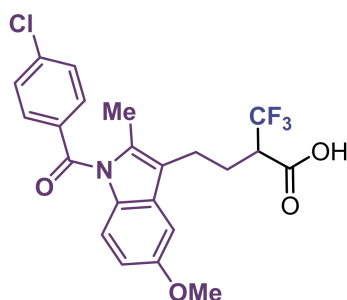

The title compound was purified with silica gel chromatography (ethyl acetate: petroleum ether, 1:20 (v:v)) as a colorless oil (87% yield).

$R_f$  = 0.45 (ethyl acetate: petroleum ether, 1:2 (v:v)).

#### NMR Spectroscopy:

$^1\text{H NMR}$  (400 MHz, Chloroform-*d*, 298 K)  $\delta$  8.17 (br, 1H), 7.64 (d,  $J$  = 6.2 Hz, 2H), 7.46 (d,  $J$  = 6.3 Hz, 2H), 6.93 - 6.84 (m, 2H), 6.67 (d,  $J$  = 9.0 Hz, 1H), 3.82 (s, 3H), 3.29 - 3.18 (m, 1H), 2.83 - 2.72 (m, 2H), 2.35 - 2.21 (m, 4H), 2.20 - 2.08 (m, 1H).

$^{13}\text{C NMR}$  (101 MHz, Chloroform-*d*, 298 K)  $\delta$  172.29, 168.58, 156.11, 139.37, 134.81, 134.02, 131.24, 131.11, 130.62, 129.28, 124.52 (q,  $J$  = 279.8 Hz), 117.51, 115.27, 111.52, 101.14, 55.76, 49.68 (q,  $J$  = 27.6 Hz), 25.94, 21.32, 13.20.

$^{19}\text{F NMR}$  (376 MHz, Chloroform-*d*, 298 K)  $\delta$  -67.54 (d,  $J$  = 8.3 Hz).

**HRMS (ESI)  $m/z$   $[M+H]^+$ :** Calculated for  $\text{C}_{22}\text{H}_{20}^{35}\text{ClF}_3\text{NO}_4^+$ : 454.1027. Found: 454.1030.

**The substrate scope of the decarboxylative cross-coupling**

(*R*)-*N*-(4-(1,1,1-trifluoro-4-phenylbutan-2-yl)phenyl)acetamide (**3a**)

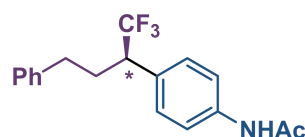

The product was obtained as a white solid (44.9 mg, 70 % yield).

$R_f$  = 0.25 (ethyl acetate: petroleum ether, 1:2 (v:v)).

**NMR Spectroscopy:**

**$^1\text{H}$  NMR** (400 MHz, Chloroform-*d*, 298 K)  $\delta$  7.64 (s, 1H), 7.54 (d,  $J$  = 7.5 Hz, 2H), 7.31 - 7.15 (m, 5H), 7.06 (d,  $J$  = 7.9 Hz, 2H), 3.25 - 3.10 (m, 1H), 2.62 - 2.51 (m, 1H), 2.44 - 2.22 (m, 2H), 2.21 - 2.06 (m, 4H).

**$^{13}\text{C}$  NMR** (101 MHz, Chloroform-*d*, 298 K)  $\delta$  168.74, 140.61, 138.07, 130.18, 129.88, 128.62, 128.49, 126.35, 126.96 (q,  $J$  = 281.5 Hz), 120.13, 48.60 (q,  $J$  = 26.3 Hz), 32.48, 30.09, 24.65.

**$^{19}\text{F}$  NMR** (376 MHz, Chloroform-*d*, 298 K)  $\delta$  -69.75 (d,  $J$  = 9.4 Hz).

**GC-MS:** 321.

**HRMS (ESI)  $m/z$   $[M+H]^+$ :** Calculated for  $\text{C}_{18}\text{H}_{19}\text{F}_3\text{NO}^+$ : 322.1413. Found: 322.1404.

**HPLC analysis:** The enantiomeric ratio was determined on a Daicel Chiralpak OD-H Column, *n*-Hexane: *i*-PrOH = 85: 15, 1.0 mL/min,  $T$  = 25 °C,  $\lambda$  = 254 nm. Retention time  $t_1$  = 9.610 min (major),  $t_2$  = 11.070 min (minor), er = 93:7.

$[\alpha]_D^{20}$  = -31.2° ( $c$  = 0.2,  $\text{CHCl}_3$ )

(*R*)-*N*-(2-fluoro-4-(1,1,1-trifluoro-4-phenylbutan-2-yl)phenyl)cyclohexanecarboxamide (**3b**)

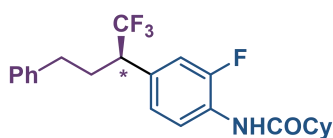

The product was obtained as a white solid (52.1 mg, 64 % yield).

$R_f$  = 0.25 (ethyl acetate: petroleum ether, 1:2 (v:v)).

**NMR Spectroscopy:**

**$^1\text{H}$  NMR** (400 MHz, Chloroform-*d*, 298 K)  $\delta$  8.41 (dt,  $J$  = 9.5, 4.8 Hz, 1H), 7.45 (s, 1H), 7.31 - 7.17 (m, 3H), 7.11 - 7.01 (m, 4H), 3.24 - 3.08 (m, 1H), 2.65 - 2.54 (m, 1H), 2.45 - 2.25 (m, 3H), 2.20 - 2.10 (m, 1H), 1.98 (d,  $J$  = 12.5 Hz, 2H), 1.85 (d,  $J$  = 12.6 Hz, 2H), 1.72 (d,  $J$  = 9.6 Hz, 1H), 1.63 - 1.49 (m, 2H), 1.40 - 1.23 (m, 3H).

**$^{13}\text{C}$  NMR** (101 MHz, Chloroform-*d*, 298 K)  $\delta$  174.59, 152.35 (d,  $J$  = 243.0 Hz), 140.34, 130.48 (d,  $J$  = 6.4 Hz), 128.68, 128.48, 126.72 (d,  $J$  = 10.1 Hz), 126.71 (q,  $J$  = 281.1 Hz),

126.45, 125.86, 121.75, 115.20 (d,  $J = 20.2$  Hz), 48.52 (q,  $J = 26.6$  Hz), 46.63, 32.40, 30.05, 29.71, 25.68.

$^{19}\text{F}$  NMR (376 MHz, Chloroform-*d*, 298 K)  $\delta$  -69.78 (d,  $J = 8.8$  Hz), -130.65.

**GC-MS:** 407.

**HRMS (ESI)  $m/z$   $[M+H]^+$ :** Calculated for  $\text{C}_{23}\text{H}_{26}\text{F}_4\text{NO}^+$ : 408.1945. Found: 408.1944.

**HPLC analysis:** The enantiomeric ratio was determined on a Daicel Chiralpak OD-H Column, *n*-Hexane: *i*-PrOH = 93: 7, 1.0 mL/min,  $T = 25$  °C,  $\lambda = 254$  nm. Retention time  $t_1 = 7.507$  min (major),  $t_2 = 8.349$  min (minor), er = 92:8.

$[\alpha]_{\text{D}}^{20} = -38.5^\circ$  ( $c = 0.2$ ,  $\text{CHCl}_3$ ).

**Melt point:** 78.4 - 79.1 °C.

(*R*)-1-methyl-4-(1,1,1-trifluoro-4-phenylbutan-2-yl)benzene (**3c**)

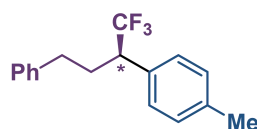

The product was obtained as a colorless oil (44.5 mg, 80 % yield).

$R_f = 0.70$  (ethyl acetate: petroleum ether, 1:20 (v:v)).

**NMR Spectroscopy:**

$^1\text{H}$  NMR (400 MHz, Chloroform-*d*, 298 K)  $\delta$  7.31 - 7.18 (m, 7H), 7.11 - 7.05 (m, 2H), 3.24 - 3.10 (m, 1H), 2.63 - 2.52 (m, 1H), 2.45 - 2.27 (m, 5H), 2.24 - 2.14 (m, 1H).

$^{13}\text{C}$  NMR (101 MHz, Chloroform-*d*, 298 K)  $\delta$  140.80, 138.11, 131.41, 129.57, 129.14, 128.59, 128.52, 126.69 (q,  $J = 281.0$  Hz), 126.29, 48.81 (q,  $J = 26.3$  Hz), 32.57, 30.17, 21.24.

$^{19}\text{F}$  NMR (376 MHz, Chloroform-*d*, 298 K)  $\delta$  -69.75 (d,  $J = 9.4$  Hz).

**GC-MS:** 278.

**HRMS (ESI)  $m/z$   $[M+H]^+$ :** Calculated for  $\text{C}_{17}\text{H}_{18}\text{F}_3^+$ : 279.1355. Found: 279.1355.

**HPLC analysis:** The enantiomeric ratio was determined on a Daicel Chiralpak IC Column, *n*-Hexane: *i*-PrOH = 99: 1, 1.0 mL/min,  $T = 25$  °C,  $\lambda = 254$  nm. Retention time  $t_1 = 6.322$  min (minor),  $t_2 = 8.819$  min (major), er = 95:5.

$[\alpha]_{\text{D}}^{20} = -52.4^\circ$  ( $c = 0.2$ ,  $\text{CHCl}_3$ )

(*R*)-1-(tert-butyl)-4-(1,1,1-trifluoro-4-phenylbutan-2-yl)benzene (**3d**)

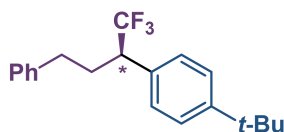

The product was obtained as a colorless oil (49.1 mg, 77 % yield).

$R_f = 0.75$  (ethyl acetate: petroleum ether, 1:20 (v:v)).

**NMR Spectroscopy:**

$^1\text{H NMR}$  (400 MHz, Chloroform-*d*, 298 K)  $\delta$  7.43 - 7.37 (m, 2H), 7.33 - 7.18 (m, 5H), 7.15 - 7.09 (m, 2H), 3.29 - 3.11 (m, 1H), 2.65 - 2.55 (m, 1H), 2.50 - 2.39 (m, 1H), 2.38 - 2.28 (m, 1H), 2.28 - 2.15 (m, 1H), 1.38 (s, 9H).

$^{13}\text{C NMR}$  (101 MHz, Chloroform-*d*, 298 K)  $\delta$  151.20, 150.02, 140.89, 138.31, 128.88, 128.59, 127.50 (q,  $J = 284.4$  Hz), 126.79, 125.75, 48.80 (q,  $J = 26.2$  Hz), 34.65, 32.70, 31.51, 30.29.

$^{19}\text{F NMR}$  (376 MHz, Chloroform-*d*, 298 K)  $\delta$  -69.56 (d,  $J = 8.7$  Hz).

**GC-MS:** 320.

**HRMS (ESI)  $m/z$   $[M+H]^+$ :** Calculated for  $\text{C}_{20}\text{H}_{24}\text{F}_3^+$ : 321.1825. Found: 321.1829.

**HPLC analysis:** The enantiomeric ratio was determined on a Daicel Chiralpak OJ-H Column, *n*-Hexane: *i*-PrOH = 99: 1, 1.0 mL/min,  $T = 25$  °C,  $\lambda = 254$  nm. Retention time  $t_1 = 4.743$  min (major),  $t_2 = 6.306$  min (minor), er = 92:8.

$[\alpha]_D^{20} = -44.5^\circ$  ( $c = 0.2$ ,  $\text{CHCl}_3$ )

(*R*)-5-(1,1,1-trifluoro-4-phenylbutan-2-yl)benzo[d][1,3]dioxole (**3e**)

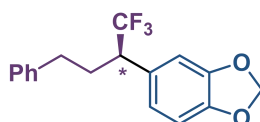

The product was obtained as a colorless oil (44.9 mg, 73 % yield).

$R_f = 0.45$  (ethyl acetate: petroleum ether, 1:20 (v:v)).

**NMR Spectroscopy:**

$^1\text{H NMR}$  (400 MHz, Chloroform-*d*, 298 K)  $\delta$  7.31 - 7.07 (m, 5H), 6.85 - 6.78 (m, 2H), 6.76 - 6.70 (m, 1H), 5.99 (s, 2H), 3.12 (ddq,  $J = 18.5, 9.3, 4.7, 3.9$  Hz, 1H), 2.60 (ddd,  $J = 13.9, 9.0, 4.9$  Hz, 1H), 2.47 - 2.36 (m, 1H), 2.30 (dtd,  $J = 12.5, 8.4, 3.8$  Hz, 1H), 2.19 - 2.06 (m, 1H).

$^{13}\text{C NMR}$  (101 MHz, Chloroform-*d*, 298 K)  $\delta$  148.17, 147.65, 140.67, 128.62, 128.51, 126.35, 126.43 (q,  $J = 281.0$  Hz), 123.18, 108.98, 108.50, 101.36, 48.88 (q,  $J = 26.7$  Hz), 32.51, 30.26.

$^{19}\text{F NMR}$  (376 MHz, Chloroform-*d*, 298 K)  $\delta$  -69.93 (d,  $J = 9.1$  Hz).

**GC-MS:** 308.

**HRMS (ESI)  $m/z$   $[M+H]^+$ :** Calculated for  $\text{C}_{17}\text{H}_{16}\text{F}_3\text{O}_2^+$ : 309.1097. Found: 309.1100.

**HPLC analysis:** The enantiomeric ratio was determined on a Daicel Chiralpak AD-H Column, *n*-Hexane: *i*-PrOH = 99: 1, 1.0 mL/min,  $T = 25$  °C,  $\lambda = 254$  nm. Retention time  $t_1 = 8.725$  min (minor),  $t_2 = 11.336$  min (major), er = 92:8.

$[\alpha]_D^{20} = -42.2^\circ$  ( $c = 0.2$ ,  $\text{CHCl}_3$ )

(*R*)-4-(1,1,1-trifluoro-4-phenylbutan-2-yl)benzaldehyde (**3f**)

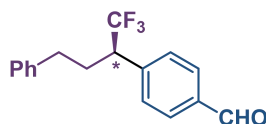

The product was obtained as a white solid (40.3 mg, 69 % yield).

$R_f$  = 0.30 (ethyl acetate: petroleum ether, 1:5 (v:v)).

**NMR Spectroscopy:**

**$^1\text{H}$  NMR** (400 MHz, Chloroform-*d*, 298 K)  $\delta$  10.06 (s, 1H), 8.19 - 8.13 (m, 1H), 7.96 - 7.89 (m, 1H), 7.50 - 7.40 (m, 2H), 7.31 - 7.18 (m, 3H), 7.11 - 7.04 (m, 2H), 3.38 - 3.26 (m, 1H), 2.65 - 2.53 (m, 1H), 2.48 - 2.36 (m, 2H), 2.33 - 2.19 (m, 1H).

**$^{13}\text{C}$  NMR** (101 MHz, Chloroform-*d*, 298 K)  $\delta$  191.85, 136.41, 130.76, 130.19, 130.05, 129.54, 128.73, 128.44, 126.59 (q,  $J$  = 281.0 Hz), 126.55, 49.37 (q,  $J$  = 26.5 Hz), 32.48, 30.11.

**$^{19}\text{F}$  NMR** (376 MHz, Chloroform-*d*, 298 K)  $\delta$  -69.13 (d,  $J$  = 9.4 Hz).

**GC-MS:** 292.

**HRMS (ESI)  $m/z$   $[M+H]^+$ :** Calculated for  $\text{C}_{17}\text{H}_{16}\text{F}_3\text{O}^+$ : 293.1148. Found: 293.1146.

**HPLC analysis:** The enantiomeric ratio was determined on a Daicel Chiralpak OJ-H Column, *n*-Hexane: *i*-PrOH = 94: 6, 1.0 mL/min,  $T$  = 25 °C,  $\lambda$  = 254 nm. Retention time  $t_1$  = 16.771 min (major),  $t_2$  = 20.950 min (minor), er = 94:6.

$[\alpha]_D^{20}$  = -81.3° ( $c$  = 0.2,  $\text{CHCl}_3$ )

(*R*)-4-(1,1,1-trifluoro-4-phenylbutan-2-yl)benzaldehyde (**3g**)

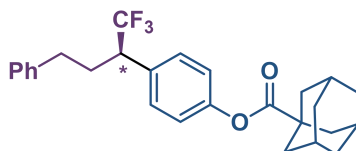

The product was obtained as a white solid (65.1 mg, 74 % yield).

$R_f$  = 0.55 (ethyl acetate: petroleum ether, 1:10 (v:v)).

**NMR Spectroscopy:**

**$^1\text{H}$  NMR** (400 MHz, Chloroform-*d*, 298 K)  $\delta$  7.32 - 7.16 (m, 5H), 7.14 - 7.05 (m, 4H), 3.28 - 3.15 (m, 1H), 2.66 - 2.56 (m, 1H), 2.47 - 2.28 (m, 2H), 2.25 - 2.13 (m, 1H), 2.14 - 2.02 (m, 9H), 1.83 - 1.73 (m, 6H).

**$^{13}\text{C}$  NMR** (101 MHz, Chloroform-*d*, 298 K)  $\delta$  176.11, 151.15, 140.54, 131.65, 130.20, 128.64, 128.51, 126.10 (q,  $J$  = 281.2 Hz), 126.37, 121.99, 48.63 (q,  $J$  = 26.4 Hz), 41.17, 38.86, 36.54, 32.49, 30.19, 28.00.

**$^{19}\text{F}$  NMR** (376 MHz, Chloroform-*d*, 298 K)  $\delta$  -69.69 (d,  $J$  = 9.3 Hz).

**GC-MS:** 442.

**HRMS (ESI)  $m/z$   $[M+H]^+$ :** Calculated for  $\text{C}_{27}\text{H}_{30}\text{F}_3\text{O}_2^+$ : 443.2192. Found: 443.2189.

**HPLC analysis:** The enantiomeric ratio was determined on a Daicel Chiralpak OJ-H Column, *n*-Hexane: *i*-PrOH = 95: 5, 1.0 mL/min, T = 25 °C,  $\lambda$  = 254 nm. Retention time  $t_1$  = 7.849 min (minor),  $t_2$  = 9.887 min (major), er = 91:9.

$[\alpha]_D^{20}$  = -51.1° (c = 0.2, CHCl<sub>3</sub>).

**Melt point:** 65.2 - 67.0°C.

Methyl (R)-4-(1,1,1-trifluoro-4-phenylbutan-2-yl)benzoate (**3h**)

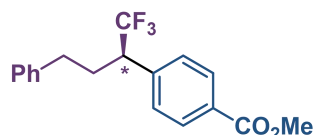

The product was obtained as a colorless oil (45.0 mg, 70 % yield).

$R_f$  = 0.60 (ethyl acetate: petroleum ether, 1:10 (v:v)).

**NMR Spectroscopy:**

**<sup>1</sup>H NMR** (400 MHz, Chloroform-*d*, 298 K)  $\delta$  8.08 (dd,  $J$  = 8.2, 2.7 Hz, 2H), 7.38 (d,  $J$  = 5.6 Hz, 2H), 7.32 - 7.17 (m, 3H), 7.08 (d,  $J$  = 6.6 Hz, 2H), 3.95 (s, 3H), 3.37 - 3.23 (m, 1H), 2.64 - 2.52 (m, 1H), 2.45 - 2.35 (m, 2H), 2.32 - 2.17 (m, 1H).

**<sup>13</sup>C NMR** (101 MHz, Chloroform-*d*, 298 K)  $\delta$  166.76, 140.27, 139.65, 130.36, 130.12, 129.40, 128.70, 128.47, 126.70 (q,  $J$  = 281.1 Hz), 126.49, 52.30, 49.21 (q,  $J$  = 26.7 Hz), 32.48, 30.12.

**<sup>19</sup>F NMR** (376 MHz, Chloroform-*d*, 298 K)  $\delta$  -69.25 (d,  $J$  = 9.3 Hz).

**GC-MS:** 322.

**HRMS (ESI)  $m/z$  [M+H]<sup>+</sup>:** Calculated for C<sub>18</sub>H<sub>18</sub>F<sub>3</sub>O<sub>2</sub><sup>+</sup>: 323.1253. Found: 323.1250.

**HPLC analysis:** The enantiomeric ratio was determined on a Daicel Chiralpak OJ-H Column, *n*-Hexane: *i*-PrOH = 94: 6, 1.0 mL/min, T = 25 °C,  $\lambda$  = 254 nm. Retention time  $t_1$  = 9.269 min (minor),  $t_2$  = 10.290 min (major), er = 93:7.

$[\alpha]_D^{20}$  = -58.0° (c = 0.2, CHCl<sub>3</sub>)

(R)-4-(1,1,1-trifluoro-4-phenylbutan-2-yl)-1,1'-biphenyl (**3i**)

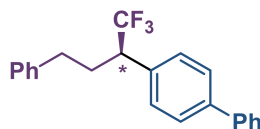

The product was obtained as a white solid (56.5 mg, 83 % yield).

$R_f$  = 0.40 (ethyl acetate: petroleum ether, 1:20 (v:v)).

**NMR Spectroscopy:**

**<sup>1</sup>H NMR** (400 MHz, Chloroform-*d*, 298 K)  $\delta$  7.69 - 7.63 (m, 4H), 7.54 - 7.45 (m, 2H), 7.44 - 7.38 (m, 3H), 7.37 - 7.29 (m, 2H), 7.29 - 7.23 (m, 1H), 7.19 - 7.12 (m, 2H), 3.38 - 3.24 (m,

1H), 2.73 - 2.62 (m, 1H), 2.55 - 2.37 (m, 2H), 2.36 - 2.23 (m, 1H).

<sup>13</sup>C NMR (101 MHz, Chloroform-*d*, 298 K)  $\delta$  141.30, 140.73, 140.63, 133.54, 129.73, 128.98, 128.68, 128.58, 127.65, 127.60, 127.25, 127.10 (q,  $J$  = 281.1 Hz), 126.40, 48.97 (q,  $J$  = 26.6 Hz), 32.65, 30.26.

<sup>19</sup>F NMR (376 MHz, Chloroform-*d*, 298 K)  $\delta$  -69.42 (d,  $J$  = 9.5 Hz).

**GC-MS:** 340.

**HRMS (ESI)  $m/z$  [M+H]<sup>+</sup>:** Calculated for C<sub>22</sub>H<sub>20</sub>F<sub>3</sub><sup>+</sup>: 341.1512. Found: 341.1519.

**HPLC analysis:** The enantiomeric ratio was determined on a Daicel Chiralpak OJ-H Column, *n*-Hexane: *i*-PrOH = 94: 6, 1.0 mL/min, T = 25 °C,  $\lambda$  = 254 nm. Retention time  $t_1$  = 10.735 min (minor),  $t_2$  = 12.286 min (major), er = 96:4.

$[\alpha]_D^{20}$  = -66.9° (c = 0.2, CHCl<sub>3</sub>).

(R)-1-(4-(1,1,1-trifluoro-4-phenylbutan-2-yl)phenyl)ethan-1-one (**3j**)

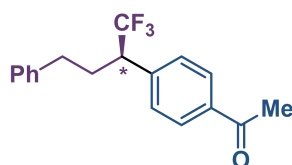

The product was obtained as a white solid (39.8 mg, 65 % yield).

$R_f$  = 0.30 (ethyl acetate: petroleum ether, 1:10 (v:v)).

**NMR Spectroscopy:**

<sup>1</sup>H NMR (400 MHz, Chloroform-*d*, 298 K)  $\delta$  7.98 (dd,  $J$  = 8.4, 2.4 Hz, 2H), 7.43 - 7.37 (m, 2H), 7.32 - 7.17 (m, 3H), 7.10 - 7.04 (m, 2H), 3.37 - 3.23 (m, 1H), 2.66 - 2.53 (m, 4H), 2.45 - 2.32 (m, 2H), 2.32 - 2.17 (m, 1H).

<sup>13</sup>C NMR (101 MHz, Chloroform-*d*, 298 K)  $\delta$  197.71, 140.23, 139.82, 137.17, 129.60, 128.86, 128.70, 128.46, 126.66 (q,  $J$  = 281.1 Hz), 126.51, 49.17 (q,  $J$  = 26.9 Hz), 32.46, 30.08, 26.75.

<sup>19</sup>F NMR (376 MHz, Chloroform-*d*, 298 K)  $\delta$  -69.24 (d,  $J$  = 9.6 Hz).

**GC-MS:** 306.

**HRMS (ESI)  $m/z$  [M+H]<sup>+</sup>:** Calculated for C<sub>18</sub>H<sub>18</sub>F<sub>3</sub>O<sup>+</sup>: 307.1304. Found: 307.1300.

**HPLC analysis:** The enantiomeric ratio was determined on a Daicel Chiralpak OD-H Column, *n*-Hexane: *i*-PrOH = 97: 3, 1.0 mL/min, T = 25 °C,  $\lambda$  = 254 nm. Retention time  $t_1$  = 10.816 min (major),  $t_2$  = 12.041 min (minor), er = 92:8.

$[\alpha]_D^{20}$  = -57.5° (c = 0.2, CHCl<sub>3</sub>)

(R)-N-methyl-4-(1,1,1-trifluoro-4-phenylbutan-2-yl)benzamide (**3k**)



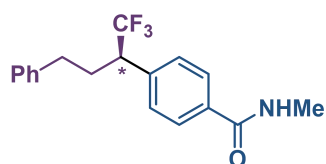

The product was obtained as a yellow solid (37.2 mg, 58 % yield).

$R_f$  = 0.45 (ethyl acetate: petroleum ether, 1:1 (v:v)).

#### NMR Spectroscopy:

$^1\text{H NMR}$  (400 MHz, Chloroform-*d*, 298 K)  $\delta$  7.79 (d,  $J$  = 8.3 Hz, 2H), 7.36 - 7.16 (m, 5H), 7.05 (d,  $J$  = 7.7 Hz, 2H), 6.74 (s, 1H), 3.32 - 3.18 (m, 1H), 2.98 (d,  $J$  = 4.8 Hz, 3H), 2.60 - 2.48 (m, 1H), 2.43 - 2.28 (m, 2H), 2.27 - 2.13 (m, 1H).

$^{13}\text{C NMR}$  (101 MHz, Chloroform-*d*, 298 K)  $\delta$  168.08, 140.31, 137.89, 134.82, 129.45, 128.66, 128.44, 127.51, 126.76 (q,  $J$  = 281.5 Hz), 126.45, 49.04 (q,  $J$  = 26.8 Hz), 32.44, 30.06, 26.92.

$^{19}\text{F NMR}$  (376 MHz, Chloroform-*d*, 298 K)  $\delta$  -69.33 (d,  $J$  = 9.4 Hz).

**GC-MS:** 321.

**HRMS (ESI)  $m/z$  [M+H] $^+$ :** Calculated for  $\text{C}_{18}\text{H}_{19}\text{F}_3\text{NO}^+$ : 322.1413. Found: 322.1412.

**HPLC analysis:** The enantiomeric ratio was determined on a Daicel Chiralpak AD-H Column, *n*-Hexane: *i*-PrOH = 95: 5, 1.0 mL/min,  $T$  = 25 °C,  $\lambda$  = 254 nm. Retention time  $t_1$  = 30.227 min (major),  $t_2$  = 40.835 min (minor), er = 95:5.

$[\alpha]_D^{20}$  = -43.0° (c = 0.2,  $\text{CHCl}_3$ )

**Melt point:** 72.4 - 73.8°C.

(*R*)-1,2-dichloro-4-(1,1,1-trifluoro-4-phenylbutan-2-yl)benzene (**31**)

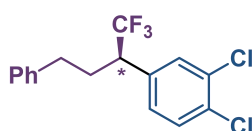

The product was obtained as a white solid (54.3 mg, 82 % yield).

$R_f$  = 0.70 (ethyl acetate: petroleum ether, 1:20 (v:v)).

#### NMR Spectroscopy:

$^1\text{H NMR}$  (400 MHz, Chloroform-*d*, 298 K)  $\delta$  7.64 - 7.59 (m, 2H), 7.55 - 7.44 (m, 3H), 7.39 - 7.33 (m, 3H), 3.22 - 3.11 (m, 1H), 2.65 - 2.56 (m, 1H), 2.46 - 2.29 (m, 2H), 2.25 - 2.08 (m, 1H).

$^{13}\text{C NMR}$  (101 MHz, Chloroform-*d*, 298 K)  $\delta$  138.82, 132.57, 131.22, 131.06, 130.87, 128.90, 128.74, 128.43, 127.15 (q,  $J$  = 288.2 Hz), 126.57, 126.25, 48.67 (q,  $J$  = 26.7 Hz), 32.41, 29.95.

$^{19}\text{F NMR}$  (376 MHz, Chloroform-*d*, 298 K)  $\delta$  -69.58 (d,  $J$  = 9.3 Hz).

**GC-MS:** 332.

**HRMS (ESI) m/z** [M+H]<sup>+</sup>: Calculated for C<sub>16</sub>H<sub>14</sub><sup>35</sup>Cl Cl<sub>2</sub>F<sub>3</sub><sup>+</sup>: 333.0419. Found: 333.0421.

**HPLC analysis:** The enantiomeric ratio was determined on a Daicel Chiralpak OJ-H Column, *n*-Hexane: *i*-PrOH = 99: 1, 1.0 mL/min, T = 25 °C, λ = 254 nm. Retention time t<sub>1</sub> = 10.717 min (minor), t<sub>2</sub> = 17.706 min (major), er = 94:6.

[α]<sub>D</sub><sup>20</sup> = -43.0° (c = 0.2, CHCl<sub>3</sub>)

(R)-5-(1,1,1-trifluoro-4-phenylbutan-2-yl)-1H-indole (**3m**)

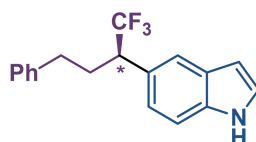

The product was obtained as a white solid (26.6 mg, 44 % yield).

R<sub>f</sub> = 0.40 (ethyl acetate: petroleum ether, 1:3 (v:v)).

**NMR Spectroscopy:**

**<sup>1</sup>H NMR** (400 MHz, Chloroform-*d*, 298 K) δ 8.18 (s, 1H), 7.60 (s, 1H), 7.41 (d, *J* = 8.5 Hz, 1H), 7.31 - 7.08 (m, 7H), 6.58 (s, 1H), 3.39 - 3.26 (m, 1H), 2.65 - 2.55 (m, 1H), 2.51 - 2.26 (m, 3H).

**<sup>13</sup>C NMR** (101 MHz, Chloroform-*d*, 298 K) δ 141.14, 135.69, 128.85, 128.56, 128.20, 126.40 (q, *J* = 281.0 Hz), 126.21, 125.76, 124.98, 123.04, 121.70, 111.38, 102.84, 49.35 (q, *J* = 26.4 Hz), 32.72, 30.62.

**<sup>19</sup>F NMR** (376 MHz, Chloroform-*d*, 298 K) δ -69.65 (d, *J* = 9.5 Hz).

**GC-MS:** 303.

**HRMS (ESI) m/z** [M+H]<sup>+</sup>: Calculated for C<sub>18</sub>H<sub>17</sub>F<sub>3</sub>N<sup>+</sup>: 304.1308. Found: 304.1319.

**HPLC analysis:** The enantiomeric ratio was determined on a Daicel Chiralpak AD-H Column, *n*-Hexane: *i*-PrOH = 96: 4, 1.0 mL/min, T = 25 °C, λ = 254 nm. Retention time t<sub>1</sub> = 12.010 min (major), t<sub>2</sub> = 22.837 min (minor), er = 92:8.

[α]<sub>D</sub><sup>20</sup> = -50.2° (c = 0.2, CHCl<sub>3</sub>)

(R)-4-(1,1,1-trifluoro-4-phenylbutan-2-yl)dibenzo[*b,d*]thiophene (**3n**)

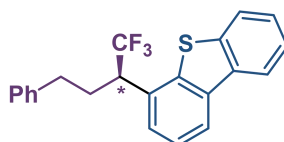

The product was obtained as a colorless solid (38.5 mg, 52 % yield).

R<sub>f</sub> = 0.50 (ethyl acetate: petroleum ether, 1:5 (v:v)).

**NMR Spectroscopy:**

**<sup>1</sup>H NMR** (400 MHz, Chloroform-*d*, 298 K) δ 8.18 (dd, *J* = 5.4, 3.4 Hz, 2H), 7.88 (dd, *J* = 5.9, 3.3 Hz, 1H), 7.59 - 7.45 (m, 4H), 7.34 - 7.17 (m, 3H), 7.11 - 7.05 (m, 2H), 3.73 - 3.62 (m, 1H),

2.60 - 2.24 (m, 4H).

$^{13}\text{C}$  NMR (101 MHz, Chloroform-*d*, 298 K)  $\delta$  141.73, 140.58, 138.82, 136.32, 136.04, 129.38, 128.63, 128.52, 127.20, 126.52 (q,  $J$  = 281.2 Hz), 126.38, 125.57, 125.29, 124.79, 122.84, 121.92, 121.60, 48.35 (q,  $J$  = 27.2 Hz), 32.69, 30.70.

$^{19}\text{F}$  NMR (376 MHz, Chloroform-*d*, 298 K)  $\delta$  -69.58 (d,  $J$  = 9.3 Hz).

**GC-MS:** 370.

**HRMS (ESI)  $m/z$   $[M+H]^+$ :** Calculated for  $\text{C}_{22}\text{H}_{18}\text{F}_3\text{S}^+$ : 371.1076. Found: 371.1071.

**HPLC analysis:** The enantiomeric ratio was determined on a Daicel Chiralpak IA Column, *n*-Hexane: *i*-PrOH = 94: 6, 1.0 mL/min,  $T$  = 25 °C,  $\lambda$  = 254 nm. Retention time  $t_1$  = 5.162 min (major),  $t_2$  = 9.189 min (minor), er = 91:9.

$[\alpha]_{\text{D}}^{20}$  = -51.7° ( $c$  = 0.2,  $\text{CHCl}_3$ )

**Melt point:** 75.0 - 75.9°C.

(*R*)-2-fluoro-5-(1,1,1-trifluoro-4-phenylbutan-2-yl)pyridine (**3o**)

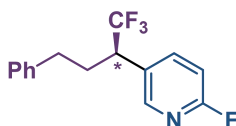

The product was obtained as a colorless oil (40.1 mg, 71 % yield).

$R_f$  = 0.65 (ethyl acetate: petroleum ether, 1:2 (v:v)).

**NMR Spectroscopy:**

$^1\text{H}$  NMR (400 MHz, Chloroform-*d*, 298 K)  $\delta$  8.10 (s, 1H), 7.74 (t,  $J$  = 8.1 Hz, 1H), 7.33 - 7.18 (m, 3H), 7.06 (dd,  $J$  = 7.8, 2.6 Hz, 2H), 7.02 - 6.95 (m, 1H), 3.33 - 3.19 (m, 1H), 2.68 - 2.56 (m, 1H), 2.47 - 2.35 (m, 2H), 2.26 - 2.10 (m, 1H).

$^{13}\text{C}$  NMR (101 MHz, Chloroform-*d*, 298 K)  $\delta$  163.68 (d,  $J$  = 240.9 Hz), 148.79 (d,  $J$  = 14.9 Hz), 141.20 (d,  $J$  = 8.0 Hz), 139.72, 128.82, 128.40, 128.08, 126.67, 126.45 (q,  $J$  = 281.0 Hz), 110.06 (d,  $J$  = 37.6 Hz), 46.01 (q,  $J$  = 27.4 Hz), 32.33, 29.75.

$^{19}\text{F}$  NMR (376 MHz, Chloroform-*d*, 298 K)  $\delta$  -68.08, -69.84 (d,  $J$  = 9.8 Hz).

**GC-MS:** 283.

**HRMS (ESI)  $m/z$   $[M+H]^+$ :** Calculated for  $\text{C}_{15}\text{H}_{14}\text{F}_4\text{N}^+$ : 284.1057. Found: 284.1069.

**HPLC analysis:** The enantiomeric ratio was determined on a Daicel Chiralpak OD-H Column, *n*-Hexane: *i*-PrOH = 98: 2, 1.0 mL/min,  $T$  = 25 °C,  $\lambda$  = 254 nm. Retention time  $t_1$  = 9.714 min (major),  $t_2$  = 16.948 min (minor), er = 94:6.

$[\alpha]_{\text{D}}^{20}$  = -59.3° ( $c$  = 0.2,  $\text{CHCl}_3$ )

(*R*)-9,9-dimethyl-3-(1,1,1-trifluoro-4-phenylbutan-2-yl)-9H-fluorene (**3p**)

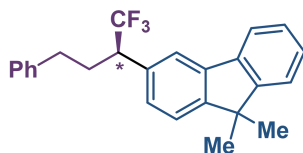

The product was obtained as a white solid (56.3 mg, 74 % yield).

$R_f$  = 0.55 (ethyl acetate: petroleum ether, 1:20 (v:v)).

**NMR Spectroscopy:**

**$^1\text{H}$  NMR** (400 MHz, Chloroform-*d*, 298 K)  $\delta$  7.74 (dd,  $J$  = 7.5, 2.4 Hz, 2H), 7.49 - 7.42 (m, 1H), 7.38 - 7.20 (m, 7H), 7.10 (d,  $J$  = 6.9 Hz, 2H), 3.37 - 3.19 (m, 1H), 2.70 - 2.59 (m, 1H), 2.49 - 2.36 (m, 2H), 2.35 - 2.21 (m, 1H), 1.52 (s, 6H).

**$^{13}\text{C}$  NMR** (101 MHz, Chloroform-*d*, 298 K)  $\delta$  154.24, 153.87, 140.72, 139.49, 138.76, 133.44, 128.61, 128.59, 128.01, 127.59, 127.16, 126.52 (q,  $J$  = 280.5 Hz), 126.35, 123.69, 122.75, 120.26, 120.21, 49.37 (q,  $J$  = 26.5 Hz), 46.97, 32.60, 30.35, 27.21.

**$^{19}\text{F}$  NMR** (376 MHz, Chloroform-*d*, 298 K)  $\delta$  -69.43 (d,  $J$  = 9.3 Hz).

**GC-MS:** 380.

**HRMS (ESI)  $m/z$   $[M+H]^+$ :** Calculated for  $\text{C}_{25}\text{H}_{24}\text{F}_3$ : 381.1825. Found: 381.1824.

**HPLC analysis:** The enantiomeric ratio was determined on a Daicel Chiralpak OD-H Column, *n*-Hexane: *i*-PrOH = 99: 1, 1.0 mL/min,  $T$  = 25 °C,  $\lambda$  = 254 nm. Retention time  $t_1$  = 4.761 min (major),  $t_2$  = 5.874 min (minor), er = 93:7.

**$[\alpha]_D^{20}$**  = -49.5° ( $c$  = 0.2,  $\text{CHCl}_3$ )

**Melt point:** 60.1 - 61.4 °C.

(8*R*,9*S*,13*S*,14*S*)-13-methyl-17-oxo-7,8,9,11,12,13,14,15,16,17-decahydro-6H-cyclopenta[*a*]phenanthren-2-yl 4-((*R*)-1,1,1-trifluoro-4-phenylbutan-2-yl)benzoate (**3q**)

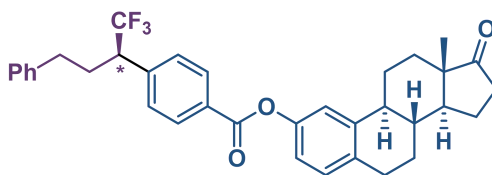

The product was obtained as a white solid (90.7 mg, 81 % yield).

$R_f$  = 0.30 (ethyl acetate: petroleum ether, 1:10 (v:v)).

**NMR Spectroscopy:**

**$^1\text{H}$  NMR** (400 MHz, Chloroform-*d*, 298 K)  $\delta$  8.23 (d,  $J$  = 8.4 Hz, 2H), 7.45 (d,  $J$  = 8.1 Hz, 2H), 7.35 (d,  $J$  = 8.5 Hz, 1H), 7.33 - 7.27 (m, 2H), 7.25 - 7.19 (m, 1H), 7.09 (d,  $J$  = 6.6 Hz, 2H), 7.04 - 6.94 (m, 2H), 3.41 - 3.26 (m, 1H), 2.98 - 2.92 (m, 2H), 2.65 - 2.37 (m, 5H), 2.34 - 1.94 (m, 6H), 1.72 - 1.40 (m, 6H), 0.93 (s, 3H).

**$^{13}\text{C}$  NMR** (101 MHz, Chloroform-*d*, 298 K)  $\delta$  165.07, 148.90, 140.35, 140.22, 138.27, 137.70,

130.70, 129.87, 129.60, 128.73, 128.49, 126.68 (q,  $J = 281.0$  Hz), 126.64, 126.54, 121.78, 118.94, 50.54, 49.25 (q,  $J = 26.9$  Hz), 48.05, 44.29, 38.14, 35.96, 32.49, 31.69, 30.13, 29.55, 26.46, 25.90, 21.70, 13.94.

$^{19}\text{F}$  NMR (376 MHz, Chloroform-*d*, 298 K)  $\delta$  -69.15 (d,  $J = 9.2$  Hz).

**HRMS (ESI)  $m/z$   $[M+H]^+$ :** Calculated for  $\text{C}_{35}\text{H}_{36}\text{F}_3\text{O}_3$ : 561.2611. Found: 561.2609.

**HPLC analysis:** The enantiomeric ratio was determined on a Daicel Chiralpak AD-H Column, *n*-Hexane: *i*-PrOH = 85: 15, 1.0 mL/min,  $T = 25$  °C,  $\lambda = 254$  nm. Retention time  $t_1 = 23.444$  min (major),  $t_2 = 68.301$  min (minor), er = 96:4.

$[\alpha]_{\text{D}}^{20} = -31.7^\circ$  ( $c = 0.2$ ,  $\text{CHCl}_3$ )

**Melt point:** 97.2 - 98.5 °C.

Ethyl 5-((*S*)-2-(6-methoxynaphthalen-2-yl)propanamido)-2-((*R*)-1,1,1-trifluoro-4-phenylbutan-2-yl)benzoate (**3r**)

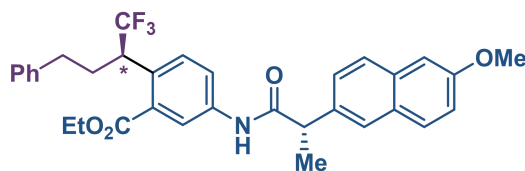

The product was obtained as a white solid (65.1 mg, 58 % yield).

$R_f = 0.25$  (ethyl acetate: petroleum ether, 1:1 (v:v)).

#### NMR Spectroscopy:

$^1\text{H}$  NMR (400 MHz, Chloroform-*d*, 298 K)  $\delta$  11.26 (s, 1H), 8.82 (d,  $J = 8.7$  Hz, 1H), 7.91 - 7.82 (m, 2H), 7.80 - 7.72 (m, 2H), 7.54 (d,  $J = 8.6$  Hz, 1H), 7.46 (d,  $J = 9.4$  Hz, 1H), 7.31 - 7.24 (m, 2H), 7.24 - 7.10 (m, 3H), 7.09 - 7.03 (m, 2H), 4.37 - 4.26 (m, 2H), 4.00 - 3.88 (m, 4H), 3.26 - 3.12 (m, 1H), 2.62 - 2.51 (m, 1H), 2.43 - 2.29 (m, 2H), 2.26 - 2.11 (m, 1H), 1.74 (d,  $J = 7.1$  Hz, 3H), 1.36 (t,  $J = 6.4$  Hz, 3H).

$^{13}\text{C}$  NMR (101 MHz, Chloroform-*d*, 298 K)  $\delta$  173.51, 167.78, 157.80, 141.72, 140.37, 136.12, 134.92, 133.98, 131.73, 129.48, 129.25, 128.66, 128.51, 128.32, 127.60, 126.70 (q,  $J = 280.6$  Hz), 126.43, 126.35, 126.31, 120.85, 119.12, 115.73, 105.71, 61.65, 55.38, 49.16, 48.47 (q,  $J = 27.0$  Hz), 32.42, 29.92, 18.37, 14.24.

$^{19}\text{F}$  NMR (376 MHz, Chloroform-*d*, 298 K)  $\delta$  -69.72 (d,  $J = 8.9$  Hz).

**HRMS (ESI)  $m/z$   $[M+H]^+$ :** Calculated for  $\text{C}_{33}\text{H}_{33}\text{F}_3\text{NO}_4$ : 564.2356. Found: 564.2349.

**HPLC analysis:** The enantiomeric ratio was determined on a Daicel Chiralpak AD-H Column, *n*-Hexane: *i*-PrOH = 85: 15, 1.0 mL/min,  $T = 25$  °C,  $\lambda = 254$  nm. Retention time  $t_1 = 6.669$  min (major),  $t_2 = 7.654$  min (minor), er = 97:3.

$[\alpha]_{\text{D}}^{20} = -20.5^\circ$  ( $c = 0.2$ ,  $\text{CHCl}_3$ ).

**Melt point:** 100.0 - 102.5 °C.

4-((R)-1,1,1-trifluoro-4-phenylbutan-2-yl)benzyl (4R)-4-((5S,8S,9S,10R,13R,14R)-5,10-dimethyl-3,7,12-trioxohexadecahydro-1H-cyclopenta[a]phenanthren-17-yl)pentanoate (**3s**)

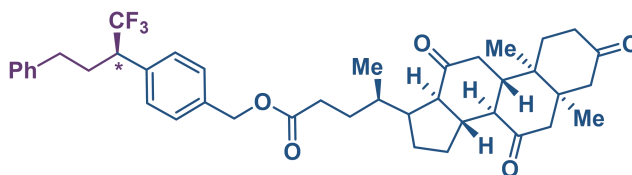

The product was obtained as a white solid (91.0 mg, 67 % yield).

$R_f$  = 0.30 (ethyl acetate: petroleum ether, 1:2 (v:v)).

#### NMR Spectroscopy:

$^1\text{H NMR}$  (400 MHz, Chloroform-*d*, 298 K)  $\delta$  7.39 - 7.16 (m, 7H), 7.09 - 7.03 (m, 2H), 5.11 (s, 2H), 3.30 - 3.10 (m, 1H), 2.93 - 2.75 (m, 3H), 2.56 - 2.13 (m, 13H), 2.03 - 1.77 (m, 8H), 1.40 - 1.18 (m, 7H), 1.01 (s, 3H), 0.83 (d,  $J$  = 4.5 Hz, 3H).

$^{13}\text{C NMR}$  (101 MHz, Chloroform-*d*, 298 K)  $\delta$  212.03, 209.16, 208.80, 173.92, 140.55, 136.31, 134.46, 129.55, 128.59, 128.24, 126.74 (q,  $J$  = 280.0 Hz), 126.32, 125.52, 65.67, 60.48, 56.96, 51.84, 49.06 (q,  $J$  = 26.8 Hz), 46.91, 45.73, 45.60, 45.00, 42.87, 38.70, 36.56, 36.08, 35.54, 35.33, 34.02, 32.54, 31.62, 30.51, 30.17, 27.71, 25.18, 21.94, 18.70, 11.86.

$^{19}\text{F NMR}$  (376 MHz, Chloroform-*d*, 298 K)  $\delta$  -69.49 (d,  $J$  = 8.8 Hz).

**HRMS (ESI)  $m/z$   $[M+H]^+$ :** Calculated for  $\text{C}_{41}\text{H}_{50}\text{F}_3\text{O}_5$ : 679.3605. Found: 679.3600.

**HPLC analysis:** The enantiomeric ratio was determined on a Daicel Chiralpak OJ-H Column, *n*-Hexane: *i*-PrOH = 85: 15, 1.0 mL/min,  $T$  = 25 °C,  $\lambda$  = 254 nm. Retention time  $t_1$  = 13.878 min (major),  $t_2$  = 15.777 min (minor), er = 93:7.

$[\alpha]_D^{20}$  = +14.8° ( $c$  = 0.2,  $\text{CHCl}_3$ ).

**Melt point:** 91.4 - 92.7°C.

(R)-N-(4-(4-(4-(tert-butyl)phenyl)-1,1,1-trifluorobutan-2-yl)phenyl)acetamide (**3t**)

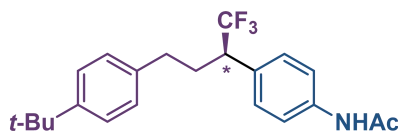

The product was obtained as a white solid (49.7 mg, 66 % yield).

$R_f$  = 0.20 (ethyl acetate: petroleum ether, 1:2 (v:v)).

#### NMR Spectroscopy:

$^1\text{H NMR}$  (400 MHz, Chloroform-*d*, 298 K)  $\delta$  7.91 (s, 1H), 7.57 (d,  $J$  = 6.4 Hz, 2H), 7.31 (d,  $J$  = 8.6 Hz, 2H), 7.25 (d,  $J$  = 6.5 Hz, 2H), 7.03 (d,  $J$  = 8.6 Hz, 2H), 3.27 - 3.14 (m, 1H), 2.60 - 2.47 (m, 1H), 2.43 - 2.27 (m, 2H), 2.23 - 2.13 (m, 4H), 1.31 (s, 9H).

$^{13}\text{C NMR}$  (101 MHz, Chloroform-*d*, 298 K)  $\delta$  168.94, 149.19, 138.11, 137.56, 130.33, 129.89,

128.14, 127.03 (q,  $J = 281.5$  Hz), 125.52, 120.23, 48.73 (q,  $J = 26.7$  Hz), 34.49, 32.00, 31.49, 30.13, 24.61.

$^{19}\text{F}$  NMR (376 MHz, Chloroform- $d$ , 298 K)  $\delta$  -69.65 (d,  $J = 9.2$  Hz).

**GC-MS:** 377.

**HRMS (ESI)  $m/z$   $[M+H]^+$ :** Calculated for  $\text{C}_{22}\text{H}_{27}\text{F}_3\text{NO}^+$ : 378.2039. Found: 378.2040.

**HPLC analysis:** The enantiomeric ratio was determined on a Daicel Chiralpak OD-H Column,  $n$ -Hexane:  $i$ -PrOH = 85: 15, 1.0 mL/min,  $T = 25$  °C,  $\lambda = 254$  nm. Retention time  $t_1 = 7.040$  min (major),  $t_2 = 8.145$  min (minor), er = 91:9.

$[\alpha]_{\text{D}}^{20} = -50.2^\circ$  ( $c = 0.2$ ,  $\text{CHCl}_3$ ).

**Melt point:** 70.1 - 72.3 °C.

(R)-N-(4-(1,1,1-trifluoro-4-(naphthalen-1-yl)butan-2-yl)phenyl)acetamide (**3u**)

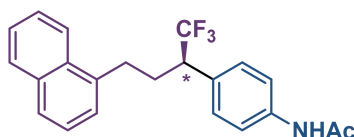

The product was obtained as a colorless oil (53.4 mg, 72 % yield).

$R_f = 0.30$  (ethyl acetate: petroleum ether, 1:1 (v:v)).

**NMR Spectroscopy:**

$^1\text{H}$  NMR (400 MHz, Chloroform- $d$ , 298 K)  $\delta$  8.01 - 7.54 (m, 12H), 3.39 - 3.20 (m, 1H), 3.07 - 2.94 (m, 1H), 2.92 - 2.83 (m, 1H), 2.51 - 2.39 (m, 1H), 2.35 - 2.24 (m, 1H), 2.16 (s, 3H).

$^{13}\text{C}$  NMR (101 MHz, Chloroform- $d$ , 298 K)  $\delta$  168.74, 138.36, 136.91, 136.69, 136.11, 132.17, 129.90, 128.99, 127.21, 126.23 (q,  $J = 278.3$  Hz), 126.20, 126.11, 125.60, 124.37, 123.48, 120.22, 49.27 (q,  $J = 26.4$  Hz), 29.96, 29.67, 24.62.

$^{19}\text{F}$  NMR (376 MHz, Chloroform- $d$ , 298 K)  $\delta$  -69.60 (d,  $J = 9.2$  Hz).

**GC-MS:** 371.

**HRMS (ESI)  $m/z$   $[M+H]^+$ :** Calculated for  $\text{C}_{22}\text{H}_{21}\text{F}_3\text{NO}^+$ : 372.1570. Found: 372.1577.

**HPLC analysis:** The enantiomeric ratio was determined on a Daicel Chiralpak OD-H Column,  $n$ -Hexane:  $i$ -PrOH = 90:10, 1.0 mL/min,  $T = 25$  °C,  $\lambda = 254$  nm. Retention time  $t_1 = 16.110$  min (major),  $t_2 = 17.946$  min (minor), er = 93:7.

$[\alpha]_{\text{D}}^{20} = -45.5^\circ$  ( $c = 0.2$ ,  $\text{CHCl}_3$ ).

(R)-N-(4-(4-(2-bromo-5-methoxyphenyl)-1,1,1-trifluorobutan-2-yl)phenyl)acetamide (**3v**)

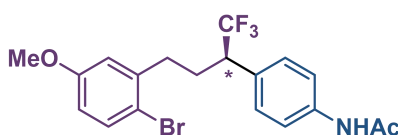

The product was obtained as a white solid (38.6 mg, 45 % yield).

$R_f = 0.25$  (ethyl acetate: petroleum ether, 1:1 (v:v)).

**NMR Spectroscopy:**

$^1\text{H NMR}$  (400 MHz, Chloroform-*d*, 298 K)  $\delta$  7.80 (s, 1H), 7.55 (d,  $J = 8.3$  Hz, 2H), 7.45 - 7.33 (m, 1H), 7.27 (d,  $J = 8.1$  Hz, 2H), 6.65 - 6.58 (m, 2H), 3.73 (s, 3H), 3.31 - 3.13 (m, 1H), 2.62 - 2.43 (m, 2H), 2.38 - 2.22 (m, 1H), 2.21 - 2.09 (m, 4H).

$^{13}\text{C NMR}$  (101 MHz, Chloroform-*d*, 298 K)  $\delta$  168.84, 159.06, 141.16, 138.21, 133.57, 129.89, 129.61, 126.83 (q,  $J = 281.5$  Hz), 120.14, 116.22, 114.76, 113.61, 55.50, 49.16 (q,  $J = 26.9$  Hz), 33.66, 28.55, 24.60.

$^{19}\text{F NMR}$  (376 MHz, Chloroform-*d*, 298 K)  $\delta$  -69.78 (d,  $J = 9.0$  Hz).

**GC-MS:** 429.

**HRMS (ESI)  $m/z$   $[M+H]^+$ :** Calculated for  $\text{C}_{19}\text{H}_{20}^{79}\text{BrF}_3\text{NO}_2^+$ : 430.0624. Found: 430.0619.

**HPLC analysis:** The enantiomeric ratio was determined on a Daicel Chiralpak OD-H Column, *n*-Hexane: *i*-PrOH = 93: 7, 1.0 mL/min,  $T = 25$  °C,  $\lambda = 254$  nm. Retention time  $t_1 = 10.880$  min (major),  $t_2 = 12.751$  min (minor), er = 87:13.

$[\alpha]_D^{20} = -53.0^\circ$  ( $c = 0.2$ ,  $\text{CHCl}_3$ ).

**Melt point:** 74.3 - 75.0°C.

(*R*)-*N*-(4-(1,1,1-trifluoro-4-(4-(trifluoromethoxy)phenyl)butan-2-yl)phenyl)acetamide (**3w**)

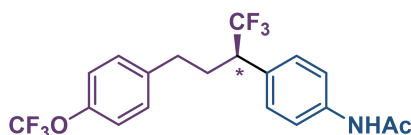

The product was obtained as a white solid (56.5 mg, 70 % yield).

$R_f = 0.25$  (ethyl acetate: petroleum ether, 1:2 (v:v)).

**NMR Spectroscopy:**

$^1\text{H NMR}$  (400 MHz, Chloroform-*d*, 298 K)  $\delta$  7.96 (s, 1H), 7.56 (d,  $J = 6.4$  Hz, 2H), 7.21 (d,  $J = 8.0$  Hz, 2H), 7.08 (q,  $J = 8.6$  Hz, 4H), 3.22 - 3.09 (m, 1H), 2.59 - 2.48 (m, 1H), 2.46 - 2.35 (m, 1H), 2.33 - 2.23 (m, 1H), 2.22 - 2.09 (m, 4H).

$^{13}\text{C NMR}$  (101 MHz, Chloroform-*d*, 298 K)  $\delta$  169.02, 147.76, 139.36, 138.24, 129.96, 129.76, 129.71, 126.86 (q,  $J = 280.1$  Hz), 121.15, 120.59 (q,  $J = 257.8$  Hz), 120.31, 48.70 (q,  $J = 26.6$  Hz), 31.89, 30.02, 24.52.

$^{19}\text{F NMR}$  (376 MHz, Chloroform-*d*, 298 K)  $\delta$  -57.83, -69.78 (d,  $J = 9.1$  Hz).

**GC-MS:** 405.

**HRMS (ESI)  $m/z$   $[M+H]^+$ :** Calculated for  $\text{C}_{19}\text{H}_{18}\text{F}_6\text{NO}_2^+$ : 406.1236. Found: 406.1233.

**HPLC analysis:** The enantiomeric ratio was determined on a Daicel Chiralpak OD-H Column, *n*-



Hexane: *i*-PrOH = 93: 7, 1.0 mL/min, T = 25 °C,  $\lambda$  = 254 nm. Retention time  $t_1$  = 11.100 min (major),  $t_2$  = 12.948 min (minor), er = 91:9.

$[\alpha]_D^{20}$  = -58.3° (c = 0.2, CHCl<sub>3</sub>).

**Melt point:** 66.9 - 67.6°C.

(R)-N-(2-fluoro-4-(1,1,1-trifluoro-4-(trifluoromethoxy)phenyl)butan-2-yl)phenyl)cyclohexanecarboxamide (**3x**)

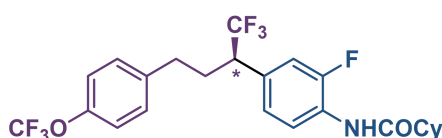

The product was obtained as a white solid (54.0 mg, 55 % yield).

$R_f$  = 0.40 (ethyl acetate: petroleum ether, 1:1 (v:v)).

#### NMR Spectroscopy:

**<sup>1</sup>H NMR** (400 MHz, Chloroform-*d*, 298 K)  $\delta$  8.39 (t,  $J$  = 8.2 Hz, 1H), 7.44 (s, 1H), 7.15 - 6.99 (m, 6H), 3.22 - 3.08 (m, 1H), 2.62 - 2.50 (m, 1H), 2.48 - 2.36 (m, 1H), 2.36 - 2.23 (m, 2H), 2.19 - 2.05 (m, 1H), 2.01 - 1.93 (m, 2H), 1.88 - 1.80 (m, 2H), 1.74 - 1.67 (m, 1H), 1.62 - 1.48 (m, 2H), 1.40 - 1.21 (m, 3H).

**<sup>13</sup>C NMR** (101 MHz, Chloroform-*d*, 298 K)  $\delta$  174.58, 153.57, 151.15, 147.84, 139.08, 129.70 (d,  $J$  = 20.6 Hz), 126.83 (d,  $J$  = 10.0 Hz), 126.58 (q,  $J$  = 281.1 Hz), 125.72 (d,  $J$  = 17.9 Hz), 121.83 (d,  $J$  = 22.7 Hz), 121.20 (d,  $J$  = 21.7 Hz), 120.68 (d,  $J$  = 280.0 Hz), 115.12 (t,  $J$  = 19.7 Hz), 48.67 (q,  $J$  = 27.8 Hz), 46.62, 31.85, 30.02, 29.70, 25.68.

**<sup>19</sup>F NMR** (376 MHz, Chloroform-*d*, 298 K)  $\delta$  -57.85, -69.85 (d,  $J$  = 8.9 Hz), -130.50 (t,  $J$  = 9.3 Hz).

**GC-MS:** 491.

**HRMS (ESI)  $m/z$  [M+H]<sup>+</sup>:** Calculated for C<sub>24</sub>H<sub>25</sub>F<sub>7</sub>NO<sub>2</sub><sup>+</sup>: 492.1768. Found: 492.1770.

**HPLC analysis:** The enantiomeric ratio was determined on a Daicel Chiralpak OD-H Column, *n*-Hexane: *i*-PrOH = 95: 5, 1.0 mL/min, T = 25 °C,  $\lambda$  = 254 nm. Retention time  $t_1$  = 5.131 min (minor),  $t_2$  = 5.678 min (major), er = 92:8.

$[\alpha]_D^{20}$  = -40.6° (c = 0.2, CHCl<sub>3</sub>).

**Melt point:** 68.2 - 69.9°C.

(R)-N-(4-(4-(4-(benzyloxy)phenyl)-1,1,1-trifluorobutan-2-yl)phenyl)acetamide (**3y**)

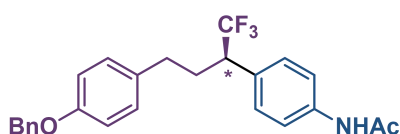

The product was obtained as a yellow oil (62.1 mg, 73 % yield).

$R_f = 0.30$  (ethyl acetate: petroleum ether, 1:1 (v:v)).

**NMR Spectroscopy:**

**$^1\text{H}$  NMR** (400 MHz, Chloroform-*d*, 298 K)  $\delta$  7.58 (s, 1H), 7.53 (d,  $J = 8.3$  Hz, 2H), 7.45 - 7.36 (m, 4H), 7.35 - 7.30 (m, 1H), 7.25 - 7.16 (m, 3H), 6.82 (dd,  $J = 8.2, 2.6$  Hz, 1H), 6.73 - 6.65 (m, 2H), 5.03 (s, 2H), 3.25 - 3.10 (m, 1H), 2.60 - 2.48 (m, 1H), 2.42 - 2.24 (m, 2H), 2.23 - 2.09 (m, 4H).

**$^{13}\text{C}$  NMR** (101 MHz, Chloroform-*d*, 298 K)  $\delta$  168.69, 159.06, 142.32, 138.05, 137.11, 129.88, 129.64, 128.70, 128.09, 127.62, 126.95 (q,  $J = 281.0$  Hz), 121.19, 120.15, 115.27, 112.53, 70.04, 48.61 (q,  $J = 26.6$  Hz), 32.53, 29.99, 24.63.

**$^{19}\text{F}$  NMR** (376 MHz, Chloroform-*d*, 298 K)  $\delta$  -69.70 (d,  $J = 9.3$  Hz).

**GC-MS:** 427.

**HRMS (ESI)  $m/z$   $[\text{M}+\text{H}]^+$ :** Calculated for  $\text{C}_{25}\text{H}_{25}\text{F}_3\text{NO}_2^+$ : 428.1832. Found: 428.1829.

**HPLC analysis:** The enantiomeric ratio was determined on a Daicel Chiralpak AD-H Column, *n*-Hexane: *i*-PrOH = 90: 10, 1.0 mL/min,  $T = 25$  °C,  $\lambda = 254$  nm. Retention time  $t_1 = 23.465$  min (major),  $t_2 = 35.555$  min (minor), er = 92:8.

$[\alpha]_D^{20} = -59.0^\circ$  ( $c = 0.2$ ,  $\text{CHCl}_3$ ).

(*R*)-*N*-(4-(1,1,1-trifluoro-4-(3-(trifluoromethyl)phenyl)butan-2-yl)phenyl)acetamide (**3z**)

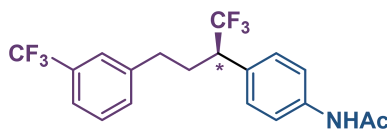

The product was obtained as a colorless oil (59.1 mg, 76 % yield).

$R_f = 0.20$  (ethyl acetate: petroleum ether, 1:2 (v:v)).

**NMR Spectroscopy:**

**$^1\text{H}$  NMR** (400 MHz, Chloroform-*d*, 298 K)  $\delta$  7.58 - 7.42 (m, 5H), 7.38 (t,  $J = 7.6$  Hz, 2H), 7.31 - 7.19 (m, 8H), 3.22 - 3.07 (m, 1H), 2.66 - 2.55 (m, 1H), 2.53 - 2.41 (m, 1H), 2.37 - 2.26 (m, 1H), 2.23 - 2.13 (m, 1H).

**$^{13}\text{C}$  NMR** (101 MHz, Chloroform-*d*, 298 K)  $\delta$  168.66, 141.52, 138.20, 131.86, 130.88 (q,  $J = 31.9$  Hz), 129.81, 129.08, 126.77 (q,  $J = 282.0$  Hz), 125.21 (q,  $J = 3.9$  Hz), 124.21 (q,  $J = 280.6$  Hz), 123.29 (q,  $J = 4.0$  Hz), 120.21, 48.77 (q,  $J = 26.7$  Hz), 32.44, 29.93, 24.67.

**$^{19}\text{F}$  NMR** (376 MHz, Chloroform-*d*, 298 K)  $\delta$  -62.49, -69.80 (d,  $J = 9.0$  Hz).

**GC-MS:** 389.

**HRMS (ESI)  $m/z$   $[\text{M}+\text{H}]^+$ :** Calculated for  $\text{C}_{19}\text{H}_{18}\text{F}_6\text{NO}^+$ : 390.1287. Found: 390.1287.

**HPLC analysis:** The enantiomeric ratio was determined on a Daicel Chiralpak OD-H Column, *n*-Hexane: *i*-PrOH = 90: 10, 1.0 mL/min,  $T = 25$  °C,  $\lambda = 254$  nm. Retention time  $t_1 = 7.734$  min

(major),  $t_2 = 8.946$  min (minor), er = 92:8.

$[\alpha]_D^{20} = -44.5^\circ$  (c = 0.2,  $\text{CHCl}_3$ ).

(R)-N-(4-(4-([1,1'-biphenyl]-4-yl)-1,1,1-trifluorobutan-2-yl)phenyl)acetamide (**3aa**)

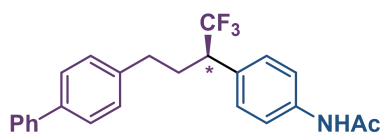

The product was obtained as a white solid (53.3 mg, 67 % yield).

$R_f = 0.30$  (ethyl acetate: petroleum ether, 1:1 (v:v)).

#### NMR Spectroscopy:

$^1\text{H NMR}$  (400 MHz, Chloroform-*d*, 298 K)  $\delta$  7.63 - 7.47 (m, 7H), 7.46 - 7.39 (m, 2H), 7.37 - 7.29 (m, 1H), 7.29 - 7.23 (m, 2H), 7.18 - 7.12 (m, 2H), 3.29 - 3.15 (m, 1H), 2.67 - 2.54 (m, 1H), 2.50 - 2.31 (m, 2H), 2.26 - 2.15 (m, 4H).

$^{13}\text{C NMR}$  (101 MHz, Chloroform-*d*, 298 K)  $\delta$  168.72, 140.99, 139.72, 139.33, 138.09, 130.22, 129.91, 128.89, 127.34, 127.09, 126.99 (q,  $J = 280.6$  Hz), 120.20, 48.70 (q,  $J = 26.5$  Hz), 32.17, 30.09, 24.64.

$^{19}\text{F NMR}$  (376 MHz, Chloroform-*d*, 298 K)  $\delta$  -69.66 (d,  $J = 9.6$  Hz).

GC-MS: 397.

HRMS (ESI)  $m/z$   $[M+H]^+$ : Calculated for  $\text{C}_{24}\text{H}_{23}\text{F}_3\text{NO}^+$ : 398.1726. Found: 398.1730.

HPLC analysis: The enantiomeric ratio was determined on a Daicel Chiralpak OD-H Column, *n*-Hexane: *i*-PrOH = 85: 15, 1.0 mL/min, T = 25 °C,  $\lambda = 254$  nm. Retention time  $t_1 = 11.586$  min (minor),  $t_2 = 19.102$  min (major), e.r = 90:10.

$[\alpha]_D^{20} = -50.0^\circ$  (c = 0.2,  $\text{CHCl}_3$ ).

Melt point: 76.4 - 78.0°C.

(R)-N-(4-(4-(4-acetylphenyl)-1,1,1-trifluorobutan-2-yl)phenyl)acetamide (**3ab**)

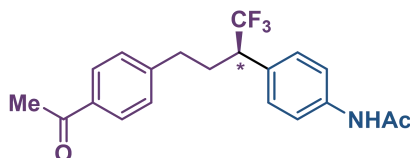

The product was obtained as a white solid (46.4 mg, 64 % yield).

$R_f = 0.20$  (ethyl acetate: petroleum ether, 1:1 (v:v)).

#### NMR Spectroscopy:

$^1\text{H NMR}$  (400 MHz, Chloroform-*d*, 298 K)  $\delta$  7.86 (d,  $J = 6.0$  Hz, 2H), 7.69 (s, 1H), 7.55 (d,  $J = 6.3$  Hz, 2H), 7.21 (d,  $J = 6.3$  Hz, 2H), 7.15 (d,  $J = 6.1$  Hz, 2H), 3.21 - 3.06 (m, 1H), 2.66 - 2.53 (m, 4H), 2.51 - 2.39 (m, 1H), 2.37 - 2.26 (m, 1H), 2.23 - 2.12 (m, 4H).

**<sup>13</sup>C NMR** (101 MHz, Chloroform-*d*, 298 K)  $\delta$  198.08, 168.74, 146.44, 138.26, 135.51, 129.79, 128.78, 128.73, 126.65 (q,  $J$  = 280.0 Hz), 120.21, 48.67 (q,  $J$  = 27.2 Hz), 32.55, 29.73, 26.68, 24.64.

**<sup>19</sup>F NMR** (376 MHz, Chloroform-*d*, 298 K)  $\delta$  -69.78 (d,  $J$  = 9.5 Hz).

**GC-MS:** 363.

**HRMS (ESI) m/z** [M+H]<sup>+</sup>: Calculated for C<sub>20</sub>H<sub>21</sub>F<sub>3</sub>NO<sub>2</sub><sup>+</sup>: 364.1519. Found: 364.1520.

**HPLC analysis:** The enantiomeric ratio was determined on a Daicel Chiralpak OD-H Column, *n*-Hexane: *i*-PrOH = 85: 15, 1.0 mL/min, T = 25 °C,  $\lambda$  = 254 nm. Retention time  $t_1$  = 13.995 min (major),  $t_2$  = 16.062 min (minor), er = 90:10.

**$[\alpha]_D^{20}$**  = -47.4° (c = 0.2, CHCl<sub>3</sub>).

**Melt point:** 72.0 - 73.8°C.

4-((R)-4-(4-acetylphenyl)-1,1,1-trifluorobutan-2-yl)phenyl (3R,5R,7R)-adamantane-1-carboxylate  
(**3ac**)

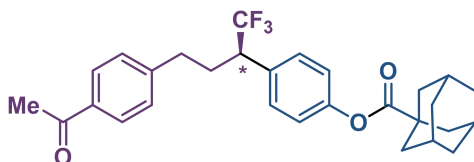

The product was obtained as a white solid (77.5 mg, 80 % yield).

**R<sub>f</sub>** = 0.40 (ethyl acetate: petroleum ether, 1:10 (v:v)).

**NMR Spectroscopy:**

**<sup>1</sup>H NMR** (400 MHz, Chloroform-*d*, 298 K)  $\delta$  7.87 (d,  $J$  = 8.4 Hz, 2H), 7.28 (d,  $J$  = 8.6 Hz, 2H), 7.16 (d,  $J$  = 8.3 Hz, 2H), 7.09 (d,  $J$  = 8.7 Hz, 2H), 3.26 - 3.11 (m, 1H), 2.69 - 2.59 (m, 4H), 2.54 - 2.42 (m, 1H), 2.41 - 2.29 (m, 1H), 2.25 - 2.14 (m, 1H), 2.11 - 2.03 (m, 10H), 1.84 - 1.70 (m, 5H).

**<sup>13</sup>C NMR** (101 MHz, Chloroform-*d*, 298 K)  $\delta$  197.88, 176.13, 151.24, 146.26, 135.59, 130.11, 128.81, 128.73, 128.11, 126.39 (q,  $J$  = 280.2 Hz), 122.09, 48.70 (q,  $J$  = 26.8 Hz), 41.15, 38.85, 36.53, 32.54, 29.82, 27.96, 26.65.

**<sup>19</sup>F NMR** (376 MHz, Chloroform-*d*, 298 K)  $\delta$  -69.73 (d,  $J$  = 8.7 Hz).

**GC-MS:** 484.

**HRMS (ESI) m/z** [M+H]<sup>+</sup>: Calculated for C<sub>29</sub>H<sub>32</sub>F<sub>3</sub>O<sub>3</sub><sup>+</sup>: 485.2298. Found: 485.2301.

**HPLC analysis:** The enantiomeric ratio was determined on a Daicel Chiralpak OD-H Column, *n*-Hexane: *i*-PrOH = 98: 2, 1.0 mL/min, T = 25 °C,  $\lambda$  = 254 nm. Retention time  $t_1$  = 7.006 min (major),  $t_2$  = 12.563 min (minor), er = 94:6.

**$[\alpha]_D^{20}$**  = -46.5° (c = 0.2, CHCl<sub>3</sub>).

**Melt point:** 64.1 - 65.5°C.

(1R,3R,4S)-4-isopropyl-3-methylcyclohexyl 2-(4-((R)-3-(4-acetamidophenyl)-4,4,4-trifluorobutyl)phenyl)acetate (**3ad**)

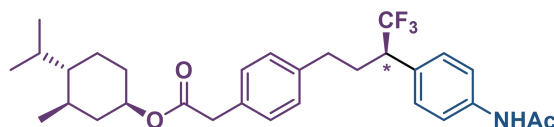

The product was obtained as a white solid (72.2 mg, 70 % yield).

$R_f$  = 0.25 (ethyl acetate: petroleum ether, 1:1 (v:v)).

#### NMR Spectroscopy:

$^1\text{H NMR}$  (400 MHz, Chloroform-*d*, 298 K)  $\delta$  7.60 (s, 1H), 7.55 - 7.48 (m, 2H), 7.23 - 7.13 (m, 4H), 7.03 - 6.97 (m, 2H), 4.65 (td,  $J$  = 10.9, 4.3 Hz, 1H), 3.55 (s, 2H), 3.22 - 3.07 (m, 1H), 2.59 - 2.49 (m, 1H), 2.42 - 2.22 (m, 2H), 2.20 - 2.10 (m, 4H), 1.95 (d,  $J$  = 12.5 Hz, 1H), 1.79 - 1.58 (m, 4H), 1.49 - 1.30 (m, 3H), 1.04 - 0.81 (m, 7H), 0.67 (d,  $J$  = 6.9 Hz, 3H).

$^{13}\text{C NMR}$  (101 MHz, Chloroform-*d*, 298 K)  $\delta$  171.50, 168.60, 139.28, 138.08, 132.35, 130.08, 129.84, 129.40, 128.59, 127.72 (q,  $J$  = 280.6 Hz), 120.11, 74.86, 48.62 (q,  $J$  = 26.5 Hz), 47.08, 41.46, 40.89, 34.31, 32.11, 31.46, 30.05, 26.24, 24.62, 23.51, 22.09, 20.75, 16.35.

$^{19}\text{F NMR}$  (376 MHz, Chloroform-*d*, 298 K)  $\delta$  -69.76 (d,  $J$  = 9.8 Hz).

**HRMS (ESI)  $m/z$   $[M+H]^+$ :** Calculated for  $\text{C}_{30}\text{H}_{39}\text{F}_3\text{NO}_3^+$ : 518.2877. Found: 518.2890.

**HPLC analysis:** The enantiomeric ratio was determined on a Daicel Chiralpak OD-H Column, *n*-Hexane: *i*-PrOH = 90: 10, 1.0 mL/min,  $T$  = 25 °C,  $\lambda$  = 254 nm. Retention time  $t_1$  = 9.703 min (major),  $t_2$  = 12.111 min (minor), er = 92:8.

$[\alpha]_D^{20}$  = +8.5° ( $c$  = 0.2,  $\text{CHCl}_3$ ).

**Melt point:** 80.0 - 81.7°C.

(R)-N-(4-(7-(2,5-dimethylphenoxy)-1,1,1-trifluoro-4,4-dimethylheptan-2-yl)phenyl)acetamide (**3ae**)

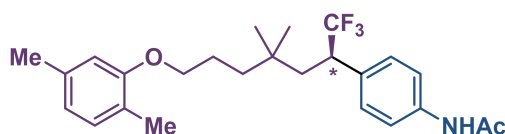

The product was obtained as a white solid (59.0 mg, 68 % yield).

$R_f$  = 0.20 (ethyl acetate: petroleum ether, 1:2 (v:v)).

#### NMR Spectroscopy:

$^1\text{H NMR}$  (400 MHz, Chloroform-*d*, 298 K)  $\delta$  7.51 - 7.45 (m, 3H), 7.30 - 7.25 (m, 2H), 7.04 - 6.97 (m, 1H), 6.69 - 6.63 (m, 1H), 6.58 (s, 1H), 3.81 - 3.70 (m, 2H), 3.37 - 3.25 (m, 1H), 2.31 (d,  $J$  = 3.8 Hz, 3H), 2.15 (dd,  $J$  = 17.2, 3.8 Hz, 6H), 1.93 (d,  $J$  = 5.1 Hz, 2H), 1.81 - 1.64 (m, 1H), 1.63 - 1.52 (m, 1H), 1.38 - 1.20 (m, 2H), 0.80 (s, 6H).

**<sup>13</sup>C NMR** (101 MHz, Chloroform-*d*, 298 K)  $\delta$  168.60, 157.12, 137.85, 136.59, 132.48, 130.37, 130.03, 127.31 (q,  $J$  = 281.1 Hz), 123.63, 120.75, 119.96, 112.12, 68.35, 46.14 (q,  $J$  = 26.1 Hz), 39.86, 38.26, 33.17, 27.69, 27.52, 24.59, 24.16, 21.48, 15.89.

**<sup>19</sup>F NMR** (376 MHz, Chloroform-*d*, 298 K)  $\delta$  -70.21 (d,  $J$  = 9.9 Hz).

**GC-MS:** 435.

**HRMS (ESI)  $m/z$  [M+H]<sup>+</sup>:** Calculated for C<sub>25</sub>H<sub>33</sub>F<sub>3</sub>NO<sub>2</sub><sup>+</sup>: 436.2458. Found: 436.2466.

**HPLC analysis:** The enantiomeric ratio was determined on a Daicel Chiralpak OJ-H Column, *n*-Hexane: *i*-PrOH = 90: 10, 1.0 mL/min, T = 25 °C,  $\lambda$  = 254 nm. Retention time  $t_1$  = 23.026 min (minor),  $t_2$  = 27.623 min (major), er = 97:3.

**$[\alpha]_D^{20}$**  = -58.0° (c = 0.2, CHCl<sub>3</sub>).

**Melt point:** 78.5 - 79.5°C.

(*R*)-2,5,7,8-tetramethyl-2-((4*R*,8*R*)-4,8,12-trimethyltridecyl)chroman-6-yl 2-(4-((*R*)-3-(4-acetamidophenyl)-4,4,4-trifluorobutyl)phenyl)acetate (**3af**)

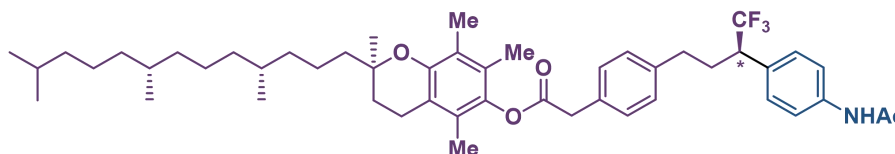

The product was obtained as a colorless oil (117.4 mg, 74 % yield).

**R<sub>f</sub>** = 0.15 (ethyl acetate: petroleum ether, 1:1 (v:v)).

#### **NMR Spectroscopy:**

**<sup>1</sup>H NMR** (400 MHz, Chloroform-*d*, 298 K)  $\delta$  7.81 (s, 1H), 7.50 (d,  $J$  = 5.7 Hz, 2H), 7.33 (d,  $J$  = 5.1 Hz, 2H), 7.20 (d,  $J$  = 5.9 Hz, 2H), 7.06 (d,  $J$  = 5.4 Hz, 2H), 3.86 (s, 2H), 3.24 - 3.04 (m, 1H), 2.62 - 2.49 (m, 3H), 2.43 - 2.27 (m, 2H), 2.24 - 2.14 (m, 1H), 2.09 (s, 3H), 2.06 (s, 3H), 1.91 (s, 3H), 1.85 (s, 3H), 1.81 - 1.68 (m, 2H), 1.58 - 1.48 (m, 3H), 1.44 - 1.00 (m, 23H), 0.91 - 0.83 (m, 10H).

**<sup>13</sup>C NMR** (101 MHz, Chloroform-*d*, 298 K)  $\delta$  170.57, 168.86, 149.57, 140.55, 139.73, 138.23, 131.77, 129.93, 129.79, 128.86, 128.77, 126.98 (q,  $J$  = 280.6 Hz), 126.75, 124.99, 123.20, 120.19, 117.56, 75.18, 48.59 (q,  $J$  = 25.8 Hz), 41.08, 39.48, 37.54, 37.39, 32.90, 32.80, 32.12, 31.17, 30.03, 28.08, 24.91, 24.55, 24.43, 22.84, 22.74, 21.10, 20.65, 19.86, 19.75, 12.88, 12.00, 11.87.

**<sup>19</sup>F NMR** (376 MHz, Chloroform-*d*, 298 K)  $\delta$  -69.70 (d,  $J$  = 8.9 Hz).

**HRMS (ESI)  $m/z$  [M+H]<sup>+</sup>:** Calculated for C<sub>49</sub>H<sub>69</sub>F<sub>3</sub>NO<sub>4</sub><sup>+</sup>: 792.5173. Found: 792.5170.

**HPLC analysis:** The enantiomeric ratio was determined on a Daicel Chiralpak OD-H Column, *n*-Hexane: *i*-PrOH = 95: 5, 1.0 mL/min, T = 25 °C,  $\lambda$  = 254 nm. Retention time  $t_1$  = 26.735 min (minor),  $t_2$  = 30.206 min (major), er = 91:9.

$[\alpha]_{\text{D}}^{20} = +18.7^{\circ}$  ( $c = 0.2$ ,  $\text{CHCl}_3$ ).

(R)-(4-chlorophenyl)(2-methyl-3-(4,4,4-trifluoro-3-(p-tolyl)butyl)-1H-indol-1-yl)methanone (**3ag**)

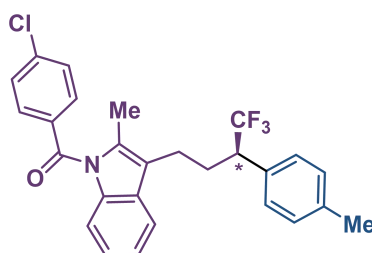

The product was obtained as a white solid (60.0 mg, 64 % yield).

$R_f = 0.40$  (ethyl acetate: petroleum ether, 1:1 (v:v)).

#### NMR Spectroscopy:

$^1\text{H NMR}$  (400 MHz, Chloroform-*d*, 298 K)  $\delta$  7.68 - 7.61 (m, 2H), 7.50 - 7.43 (m, 2H), 7.30 - 7.20 (m, 4H), 6.98 - 6.87 (m, 2H), 6.77 - 6.73 (m, 1H), 6.72 - 6.64 (m, 1H), 3.39 - 3.23 (m, 1H), 2.62 - 2.53 (m, 2H), 2.43 - 2.29 (m, 5H), 2.26 - 2.14 (m, 3H).

$^{13}\text{C NMR}$  (101 MHz, Chloroform-*d*, 298 K)  $\delta$  168.34, 156.05, 139.17, 138.32, 134.42, 134.29, 131.42, 131.19, 131.11, 130.88, 129.64, 129.20, 127.06 (q,  $J = 280.0$  Hz), 118.45, 115.18, 111.43, 101.20, 55.71, 49.33 (q,  $J = 26.7$  Hz), 28.46, 21.23, 13.30.

$^{19}\text{F NMR}$  (376 MHz, Chloroform-*d*, 298 K)  $\delta$  -69.67 (d,  $J = 9.5$  Hz).

**HRMS (ESI)  $m/z$   $[M+H]^+$ :** Calculated for  $\text{C}_{27}\text{H}_{24}^{35}\text{ClF}_3\text{NO}^+$ : 470.1493. Found: 470.1481.

**HPLC analysis:** The enantiomeric ratio was determined on a Daicel Chiralpak IC Column, *n*-Hexane: *i*-PrOH = 96: 4, 1.0 mL/min,  $T = 25$  °C,  $\lambda = 254$  nm. Retention time  $t_1 = 49.563$  min (major),  $t_2 = 92.971$  min (minor), er = 97:3.

$[\alpha]_{\text{D}}^{20} = -41.4^{\circ}$  ( $c = 0.2$ ,  $\text{CHCl}_3$ ).

**Melt point:** 89.0 - 91.0°C.

### Direct decarboxylative C(sp<sup>3</sup>)-C(sp<sup>3</sup>) coupling.

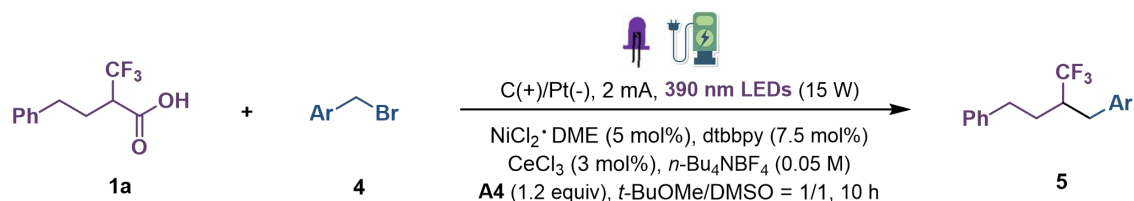

**Scheme S3.** General procedure for the decarboxylative C(sp<sup>3</sup>)-C(sp<sup>3</sup>) coupling of  $\alpha$ -CF<sub>3</sub> carboxylic acids.

An oven-dried screw-cap vial was equipped with a stir bar, a threaded Teflon cap fitted with electrical feedthroughs, a graphite plate anode (2.5 cm \* 0.5 cm), and a platinum plate cathode (2.5 cm \* 0.5 cm). Under nitrogen atmosphere, *n*-Bu<sub>4</sub>NBF<sub>4</sub> (66 mg, 0.10 mmol, 0.5 eq.), sodium phthalate (**A4**) (58 mg, 0.24 mmol, 1.2 eq.),  $\alpha$ -CF<sub>3</sub> carboxylic acid (0.20 mmol, 1.0 eq.), benzyl bromide (0.24 mmol, 1.2 eq.), CeCl<sub>3</sub> (1.5 mg, 0.006 mmol, 3 mol%), NiCl<sub>2</sub> DME (2.2 mg, 0.01 mmol, 5 mol%), and dtbbpy (4.1 mg, 0.015 mmol, 7.5 mol%) were added to this reaction vessel. After that, the mixture of *t*-BuOMe and DMSO (1:1(v:v), 2.0 mL) were added via syringe. The reaction was irradiated with purple LEDs (15 W, 390 nm) under the vessel and electrolysis was initiated at a constant current of 2.0 mA. The temperature was kept at approximately 30°C through the use of a cooling fan. After 10 hours, the photolysis and electrolysis were terminated and the reaction was quenched with 10 mL water, then extracted with DCM (3 x 10 mL). The combined organic phase was dried with anhydrous Na<sub>2</sub>SO<sub>4</sub> and concentrated under vacuum. The residue was further purified by column chromatography to afford corresponding coupling products, which was characterized by GC-MS analysis, <sup>1</sup>H NMR, <sup>13</sup>C NMR and <sup>19</sup>F NMR spectroscopy.

1-methoxy-4-(4-phenyl-2-(trifluoromethyl)butyl)benzene (**5a**)

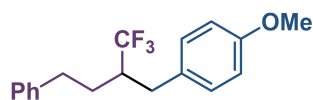

The product was obtained as a colorless oil (40.6 mg, 66 % yield).

$R_f$  = 0.65 (ethyl acetate: petroleum ether, 1:5 (v:v)).

#### NMR Spectroscopy:

<sup>1</sup>H NMR (400 MHz, Chloroform-*d*, 298 K)  $\delta$  7.26 - 7.20 (m, 2H), 7.20 - 7.14 (m, 1H), 7.09 - 6.99 (m, 4H), 6.83 (d,  $J$  = 8.6 Hz, 2H), 3.80 (s, 3H), 3.00 (dd,  $J$  = 14.2, 4.6 Hz, 1H), 2.72 - 2.49 (m, 3H), 2.36 (dtq,  $J$  = 14.2, 9.4, 4.9, 4.3 Hz, 1H), 1.96 - 1.82 (m, 1H), 1.81 - 1.68 (m, 1H).

<sup>13</sup>C NMR (101 MHz, Chloroform-*d*, 298 K)  $\delta$  158.42, 141.15, 130.15, 130.12, 128.51, 128.45 (q,  $J$  = 282.0 Hz), 128.43, 126.14, 114.07, 55.35, 44.01 (q,  $J$  = 24.6 Hz), 33.43, 33.07, 29.05.

<sup>19</sup>F NMR (376 MHz, Chloroform-*d*, 298 K)  $\delta$  -69.84 (d,  $J$  = 9.1 Hz).



**GC-MS:** 308

**HRMS (ESI) m/z** [M+H]<sup>+</sup>: Calculated for C<sub>18</sub>H<sub>20</sub>F<sub>3</sub>O<sup>+</sup>: 309.1461. Found: 309.1455.

4-(4-phenyl-2-(trifluoromethyl)butyl)-1,1'-biphenyl (**5b**)

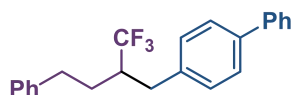

The product was obtained as a colorless oil (27.5 mg, 39 % yield).

**R<sub>f</sub>** = 0.60 (ethyl acetate: petroleum ether, 1:5 (v:v)).

**NMR Spectroscopy:**

**<sup>1</sup>H NMR** (400 MHz, Chloroform-*d*, 298 K) δ 7.62 (d, *J* = 8.2 Hz, 2H), 7.55 (d, *J* = 8.0 Hz, 2H), 7.50 - 7.43 (m, 2H), 7.41 - 7.33 (m, 1H), 7.29 - 7.15 (m, 5H), 7.05 (d, *J* = 7.7 Hz, 2H), 3.12 (dd, *J* = 14.1, 4.3 Hz, 1H), 2.78 - 2.67 (m, 2H), 2.66 - 2.57 (m, 1H), 2.53 - 2.40 (m, 1H), 2.03 - 1.90 (m, 1H), 1.88 - 1.76 (m, 1H).

**<sup>13</sup>C NMR** (101 MHz, Chloroform-*d*, 298 K) δ 141.04, 140.87, 139.67, 137.29, 129.61, 128.93, 128.57, 128.48, 128.46 (q, *J* = 281.5 Hz), 127.39, 127.13, 126.20, 43.81 (q, *J* = 24.5 Hz), 34.00, 33.07, 29.14.

**<sup>19</sup>F NMR** (376 MHz, Chloroform-*d*, 298 K) δ -69.81 (d, *J* = 9.3 Hz).

**GC-MS:** 354

**HRMS (ESI) m/z** [M+H]<sup>+</sup>: Calculated for C<sub>23</sub>H<sub>22</sub>F<sub>3</sub><sup>+</sup>: 355.1668. Found: 355.1666.

(2-(trifluoromethyl)butane-1,4-diyl)dibenzene (**5c**)

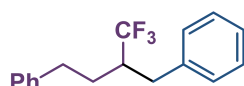

The product was obtained as a colorless oil (34.0 mg, 61 % yield).

**R<sub>f</sub>** = 0.55 (ethyl acetate: petroleum ether, 1:10 (v:v)).

**NMR Spectroscopy:**

**<sup>1</sup>H NMR** (400 MHz, Chloroform-*d*, 298 K) δ 7.28 - 7.12 (m, 4H), 7.11 - 6.95 (m, 4H), 6.86 - 6.79 (m, 2H), 3.05 - 2.96 (m, 1H), 2.73 - 2.49 (m, 3H), 2.44 - 2.26 (m, 1H), 1.97 - 1.83 (m, 1H), 1.82 - 1.68 (m, 1H).

**<sup>13</sup>C NMR** (101 MHz, Chloroform-*d*, 298 K) δ 156.73, 141.18, 130.14, 130.00, 128.51, 128.47 (q, *J* = 281.5 Hz), 128.44, 126.08, 116.26, 43.98 (q, *J* = 26.9 Hz), 33.47, 33.07, 29.04.

**<sup>19</sup>F NMR** (376 MHz, Chloroform-*d*, 298 K) δ -69.88 (d, *J* = 9.5 Hz).

**GC-MS:** 278

**HRMS (ESI) m/z** [M+H]<sup>+</sup>: Calculated for C<sub>17</sub>H<sub>18</sub>F<sub>3</sub><sup>+</sup>: 279.1355. Found: 279.135.

The C(sp<sup>3</sup>)-C(sp<sup>3</sup>) coupling of unactivated alkyl halide.

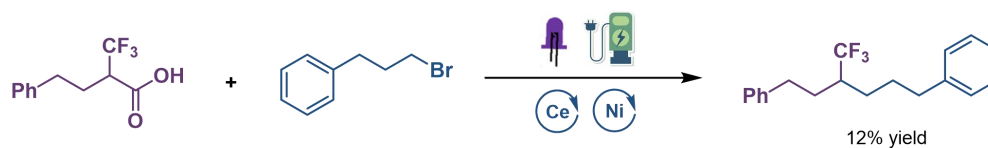

**side products** (GC-MS yield)

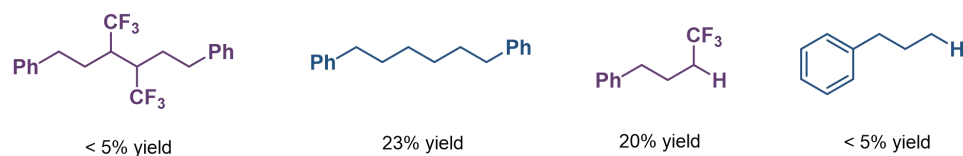

The reaction between C(sp<sup>2</sup>) halides and alkyl radical precursors are typical strategies, which proceeded by Ni-catalyzed hybridization-dependent cross-coupling. However, the radical-radical cross coupling for the construction of C(sp<sup>3</sup>)-C(sp<sup>3</sup>) bonds remains an important yet elusive objective for coupling reactions, which mainly attributed to the potential competitive radical side reactions and the difficulty in regulating cross-selectivity caused by similar reactivity and addition rate to metal center of two radicals. In fact, we have also conducted the reaction of 1-bromo-3-phenylpropane with  $\alpha$ -CF<sub>3</sub> carboxylic acids under standard conditions, but it exhibited poor cross selectivity. Applications of the photo-electrocatalytic LMCT protocol to challenging C(sp<sup>3</sup>)-C(sp<sup>3</sup>) coupling are ongoing in our laboratory.

### Compatibility with cross-electrophile coupling.

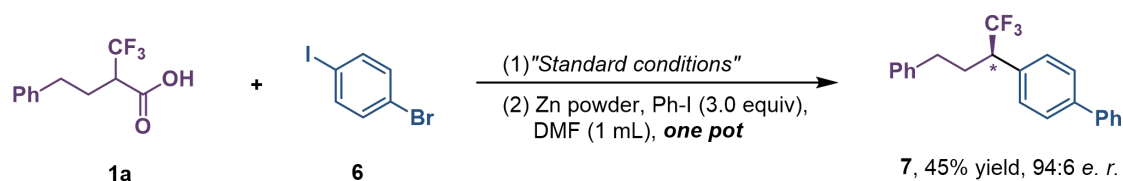

**Scheme S4.** Compatibility with cross-electrophile coupling.

An oven-dried screw-cap vial was equipped with a stir bar, a threaded Teflon cap fitted with electrical feedthroughs, a graphite plate anode (2.5 cm \* 0.5 cm), and a platinum plate cathode (2.5 cm \* 0.5 cm). Under nitrogen atmosphere, *n*-Bu<sub>4</sub>NBF<sub>4</sub> (66 mg, 0.10 mmol, 0.5 eq.), sodium phthalate (**A4**) (58 mg, 0.24 mmol, 1.2 eq.),  $\alpha$ -CF<sub>3</sub> carboxylic acid (0.20 mmol, 1.0 eq.), 4-bromoiodobenzene (**6**, 0.30 mmol, 1.5 eq.) and CeCl<sub>3</sub> (1.5 mg, 0.006 mmol, 3 mol%) were added to this reaction vessel. After that, the mixture of MeCN and DMSO (9:1(v:v), 2.0 mL) were added via syringe. The reaction was irradiated with purple LEDs (15 W, 390 nm) under the vessel and electrolysis was initiated at a constant current of 2.0 mA. The temperature was kept at approximately 30°C through the use of a cooling fan. After 10 hours, photolysis and electrolysis were terminated. Iodine benzene (3.0 equiv, 0.6 mmol), Zn powder (3.0 equiv, 0.6 mmol), and 1 mL of dry DMF were added to the reaction flask, and stirred for an additional 12 hours. After this, the reaction was quenched with 10 mL water, then extracted with DCM (3 x 10 mL). The combined organic phase was dried with anhydrous Na<sub>2</sub>SO<sub>4</sub> and concentrated under vacuum. The residue was further purified by column chromatography to afford corresponding coupling products, which was characterized by GC-MS analysis, <sup>1</sup>H NMR, <sup>13</sup>C NMR and <sup>19</sup>F NMR spectroscopy.

### Large-scale synthesis.

1 mmol scale

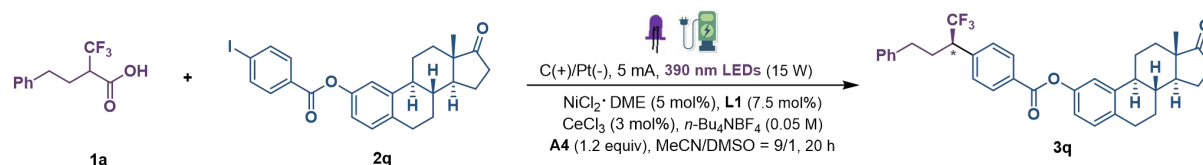

**Scheme S5.** Large-scale synthesis (1 mmol scale).

An oven-dried screw-cap vial was equipped with a stir bar, a threaded Teflon cap fitted with electrical feedthroughs, a graphite plate anode (2.5 cm \* 0.5 cm), and a platinum plate cathode (2.5 cm \* 0.5 cm). Under nitrogen atmosphere, *n*-Bu<sub>4</sub>NBF<sub>4</sub> (330 mg, 0.50 mmol, 0.5 eq.), sodium phthalate (**A4**) (290 mg, 1.2 mmol, 1.2 eq.),  $\alpha$ -CF<sub>3</sub> carboxylic acid **1a** (232 mg, 1.0 mmol, 1.0 eq.), aryl iodide **2q** (600 mg, 1.2 mmol, 1.2 eq.), CeCl<sub>3</sub> (7.5 mg, 0.03 mmol, 3 mol%), NiCl<sub>2</sub> DME (11.0

mg, 0.05 mmol, 5 mol%), and chiral ligand (**L1**) (17.0 mg, 0.075 mmol, 7.5 mol%) were added to this reaction vessel. After that, the mixture of MeCN and DMSO (9:1(v:v), 10 mL) were added via syringe. The reaction was irradiated with purple LEDs (15 W, 390 nm) under the vessel and electrolysis was initiated at a constant current of 5.0 mA. The temperature was kept at approximately 30°C through the use of a cooling fan. After 20 hours, the photolysis and electrolysis were terminated and the reaction was quenched with 20 mL water, then extracted with DCM (3 x 20 mL). The combined organic phase was dried with anhydrous Na<sub>2</sub>SO<sub>4</sub> and concentrated under vacuum. The residue was further purified by column chromatography to afford corresponding coupling products.

(8R,9S,13S,14S)-13-methyl-17-oxo-7,8,9,11,12,13,14,15,16,17-decahydro-6H-cyclopenta[a]phenanthren-2-yl 4-((R)-1,1,1-trifluoro-4-phenylbutan-2-yl)benzoate (**3q**)

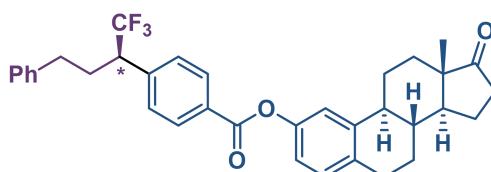

The product was obtained as a white solid (420.1 mg, 75 % yield).

**HPLC analysis:** The enantiomeric ratio was determined on a Daicel Chiralpak AD-H Column, *n*-Hexane: *i*-PrOH = 85: 15, 1.0 mL/min, T = 25 °C, λ = 254 nm. Retention time t<sub>1</sub> = 23.464 min (major), t<sub>2</sub> = 68.430 min (minor), er = 96:4.

3 mmol scale

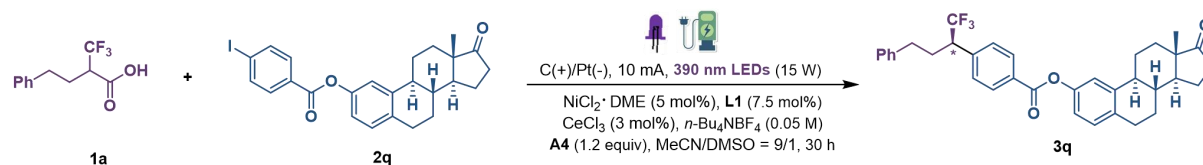

**Scheme S6.** Large-scale synthesis (3 mmol scale).

An oven-dried screw-cap vial was equipped with a stir bar, a threaded Teflon cap fitted with electrical feedthroughs, a graphite plate anode (2.5 cm \* 0.5 cm), and a platinum plate cathode (2.5 cm \* 0.5 cm). Under nitrogen atmosphere, *n*-Bu<sub>4</sub>NBF<sub>4</sub> (0.99 g, 1.5 mmol, 0.5 eq.), sodium phthalate (**A4**) (0.87 g, 3.6 mmol, 1.2 eq.), α-CF<sub>3</sub> carboxylic acid **1a** (0.87 g, 3.0 mmol, 1.0 eq.), aryl iodide **2q** (1.5 g, 3.6 mmol, 1.2 eq.), CeCl<sub>3</sub> (22.5 mg, 0.09 mmol, 3 mol%), NiCl<sub>2</sub> DME (33.0 mg, 0.15 mmol, 5 mol%), and chiral ligand (**L1**) (51.0 mg, 0.225 mmol, 7.5 mol%) were added to this reaction vessel. After that, the mixture of MeCN and DMSO (9:1(v:v), 15 mL) were added via syringe. The reaction was irradiated with purple LEDs (15 W, 390 nm) under the vessel and

electrolysis was initiated at a constant current of 10 mA, The temperature was kept at approximately 30°C through the use of a cooling fan. After 30 hours, the photolysis and electrolysis were terminated and the reaction was quenched with 30 mL water, then extracted with DCM (3 x 40 mL). The combined organic phase was dried with anhydrous Na<sub>2</sub>SO<sub>4</sub> and concentrated under vacuum. The residue was further purified by column chromatography to afford corresponding coupling products.

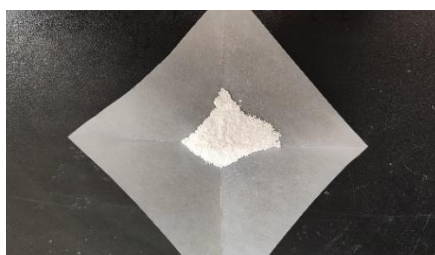**3q** (1.04 g)

(8R,9S,13S,14S)-13-methyl-17-oxo-7,8,9,11,12,13,14,15,16,17-decahydro-6H-cyclopenta[a]phenanthren-2-yl 4-((R)-1,1,1-trifluoro-4-phenylbutan-2-yl)benzoate (**3q**)

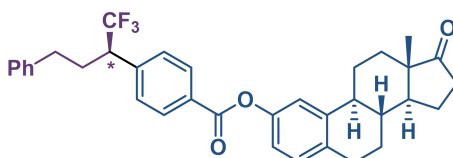

The product was obtained as a white solid (1.04 g, 62 % yield).

**HPLC analysis:** The enantiomeric ratio was determined on a Daicel Chiralpak AD-H Column, *n*-Hexane: *i*-PrOH = 85: 15, 1.0 mL/min, T = 25 °C, λ = 254 nm. Retention time t<sub>1</sub> = 23.439 min (major), t<sub>2</sub> = 68.411 min (minor), er = 96:4.

## Mechanistic Investigations

Radical-trapping experiments <sup>[3]</sup>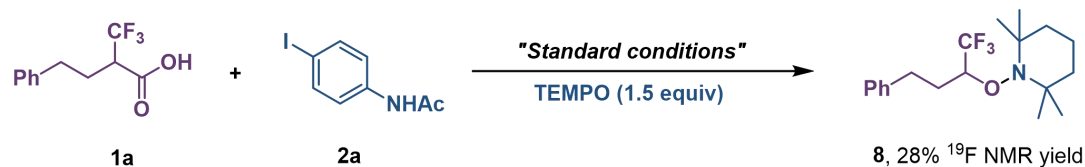

Scheme S7. Radical trap reaction of TEMPO.

TEMPO (1.5 equiv) were subjected to the standard conditions. TEMPO-fluoroalkyl adduct **8** was detected by <sup>1</sup>H NMR, <sup>19</sup>F NMR spectroscopy and HRMS. 28% <sup>19</sup>F NMR yield (4-fluoro-iodobenzene as internal standard).

**HRMS (ESI) m/z [M+H]<sup>+</sup>**: Calculated for C<sub>19</sub>H<sub>29</sub>F<sub>3</sub>NO<sup>+</sup>: 344.2196. Found: 344.2201.

**<sup>1</sup>H NMR** (400 MHz, Chloroform-d, 298 K) 7.29 - 7.13 (m, 5H), 4.41 - 4.29 (m, 1H), 2.69 (dt, *J* = 12.7, 11.8, 2H), 2.05 - 1.89 (m, 2H), 1.83 - 1.74 (m, 2H), 1.68 - 1.46 (m, 4H), 1.21 (s, 12H).

**<sup>19</sup>F NMR** (376 MHz, Chloroform-d, 298 K) δ -73.29 (d, *J* = 6.7 Hz, CF<sub>3</sub>).

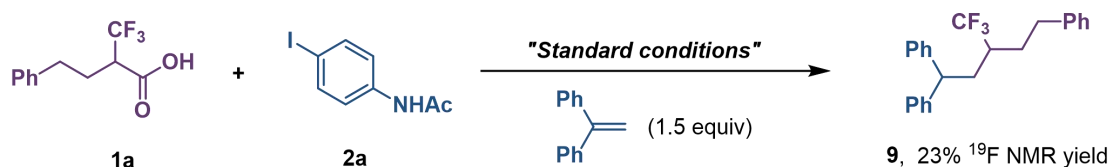

Scheme S8. Radical trap reaction of 1,1-diphenylethylene.

1,1-Diphenylethylene (1.5 equiv) were subjected to the standard conditions. hydrofluoroalkylation product **9** was detected <sup>1</sup>H NMR, <sup>19</sup>F NMR spectroscopy and GC-MS. 23% <sup>19</sup>F NMR yield (4-fluoro-iodobenzene as internal standard).

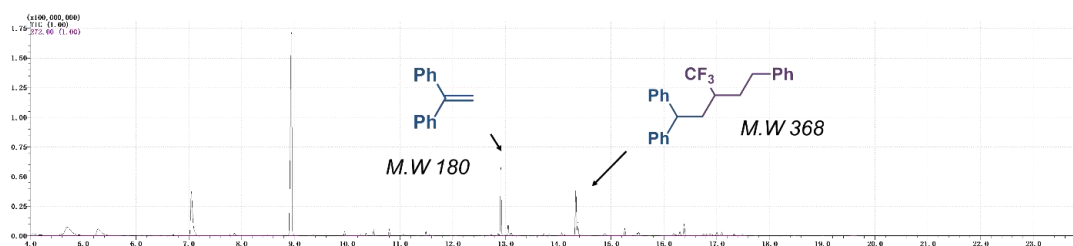Figure S2. GC-MS spectra of radical trapping product **9**.

**<sup>1</sup>H NMR** (400 MHz, Chloroform-d, 298 K) 7.34 - 7.16 (m, 15H), 3.93 (dt, *J* = 11.6, 10.5, Hz, 1H), 2.70 - 2.60 (m, 2H), 2.41 - 2.16 (m, 1H), 2.09 - 1.92 (m, 2H), 1.77 - 1.63 (m, 2H).

**<sup>19</sup>F NMR** (376 MHz, Chloroform-d, 298 K) δ -71.02 (d, *J* = 8.2 Hz, CF<sub>3</sub>).

Electricity and light on/off experiments <sup>[4]</sup>

An oven-dried screw-cap vial was equipped with a stir bar, a threaded Teflon cap fitted with electrical feedthroughs, a graphite plate anode (2.5 cm \* 0.5 cm), and a platinum plate cathode (2.5 cm \* 0.5 cm). Under nitrogen atmosphere, *n*-Bu<sub>4</sub>NBF<sub>4</sub> (66 mg, 0.10 mmol, 0.5 eq.), sodium phthalate (**A4**) (58 mg, 0.24 mmol, 1.2 eq.),  $\alpha$ -CF<sub>3</sub> carboxylic acid **1a** (0.20 mmol, 1.0 eq.), aryl iodide **2a** (0.24 mmol, 1.2 eq.), CeCl<sub>3</sub> (1.5 mg, 0.006 mmol, 3 mol%), NiCl<sub>2</sub> DME (2.2 mg, 0.01 mmol, 5 mol%), and chiral ligand (**L1**) (3.4 mg, 0.015 mmol, 7.5 mol%) were added to this reaction vessel. After that, the mixture of MeCN and DMSO (9:1(v:v), 2.0 mL) were added via syringe. Turn on the light and irradiate for 1 hour under constant 2 mA current, then the reaction mixture (0.1 mL) were taken with a syringe. The product yield was then measured by <sup>19</sup>F-NMR analysis with CF<sub>3</sub>-DMA as an internal standard, after which the reaction mixture was kept in dark or without current for 1 hour and further analyzed by <sup>19</sup>F-NMR with CF<sub>3</sub>-DMA as an internal standard. These on-off measurements were repeated, which showed that the product is formed only upon constant irradiation and electrolyzation and the reaction was not a chain reaction.

| Time  | 1 h | 2 h (electricity off) | 3 h | 4 h (light off) | 5 h |
|-------|-----|-----------------------|-----|-----------------|-----|
| Yield | 13% | 13%                   | 22% | 22%             | 28% |

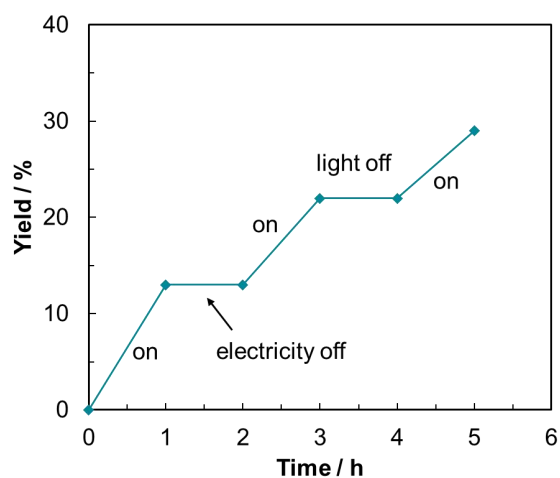

**Figure S3.** Electricity and light on/off experiments.

## Catalytic experiments with cerium complex.

## Preparation of cerium complex.

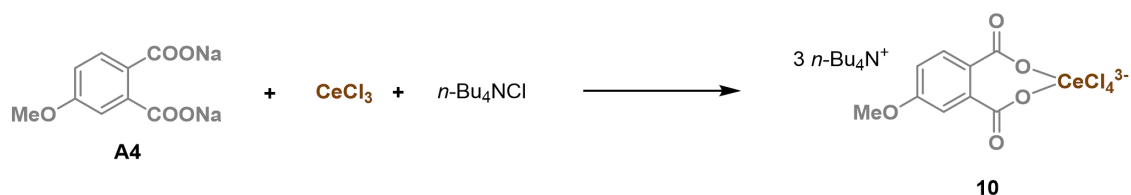**Scheme S9.** Preparation of cerium complex.

To the solution of **A4** (72.0 mg, 0.30 mmol, 1.0 equiv.) in  $\text{H}_2\text{O}$  (5 mL),  $\text{CeCl}_3$  (74.0 mg, 0.30 mmol, 1.0 equiv.) and  $n\text{-Bu}_4\text{NCl}$  (416.9 mg, 1.5 mmol, 5.0 equiv.) was added slowly. After stirring for 2 hours at room temperature, the resulting white solid was filtered over a sintered-glass funnel and washed with a small amount of cold  $\text{H}_2\text{O}$  (10-20 mL). The solid was dried for 6 h under high vacuum to give  $n\text{-Bu}_4\text{N}_3(\text{ArCOO})_2\text{-CeCl}_4$  complex **10** as white solid in 51% yield, which was characterized by  $^1\text{H}$  NMR and HRMS.

$^1\text{H}$  NMR (400 MHz,  $\text{DMSO-}d_6$ , 298 K)  $\delta$  7.70 (d,  $J = 8.5$  Hz, 1H), 7.10 - 6.93 (m, 2H), 3.17 - 3.08 (m, 1H), 1.59 - 1.47 (m, 1H), 1.27 (h,  $J = 7.4$  Hz, 1H), 0.90 (t,  $J = 7.3$  Hz, 1H).

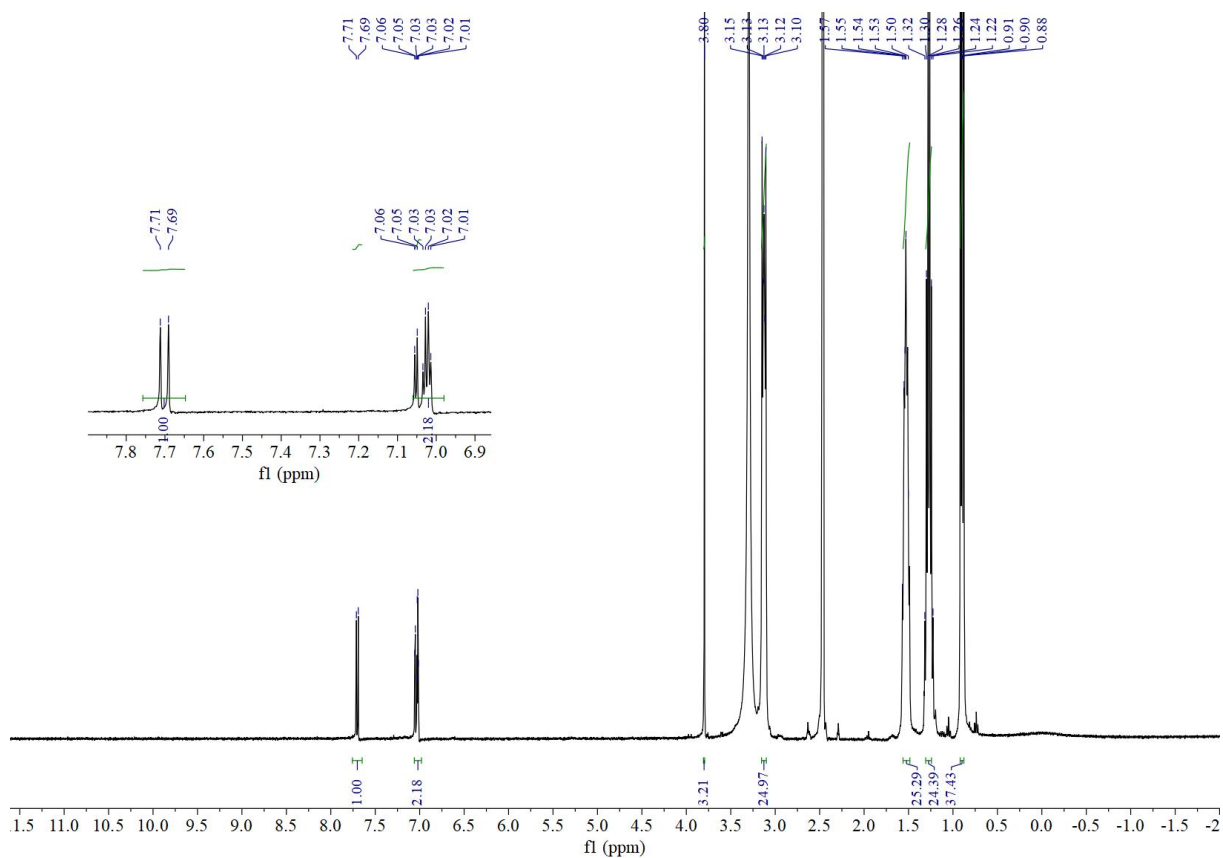**Figure S4.**  $^1\text{H}$  NMR spectrum of  $n\text{-Bu}_4\text{N}_3(\text{ArCOO})_2\text{-CeCl}_4$  complex **10**.



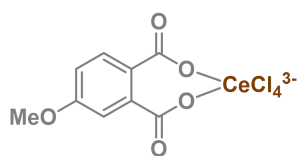

**HRMS (ESI) m/z:** Calculated for  $C_9H_6CeCl_4O_5^{3-}$ : 158.6004. Found: 158.6019.

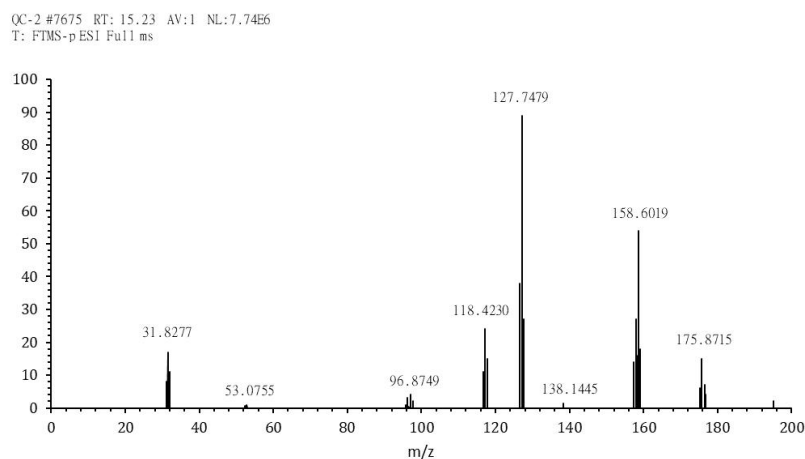

**Figure S5.** HRMS spectrum of  $n\text{-Bu}_4\text{N}^3(\text{ArCOO})_2\text{-CeCl}_4$  complex **10**.

Catalytic experiments with cerium complex.

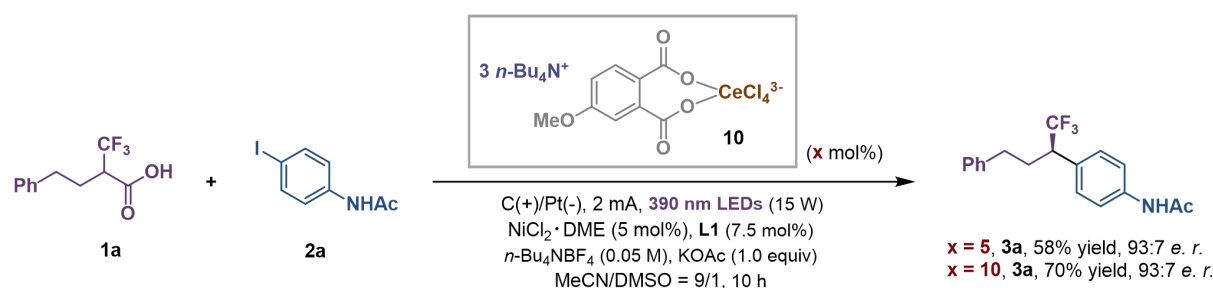

**Scheme S10.** Catalytic experiments with cerium complex.

An oven-dried screw-cap vial was equipped with a stir bar, a threaded Teflon cap fitted with electrical feedthroughs, a graphite plate anode (2.5 cm \* 0.5 cm), and a platinum plate cathode (2.5 cm \* 0.5 cm). Under nitrogen atmosphere,  $n\text{-Bu}_4\text{NBF}_4$  (66 mg, 0.10 mmol, 0.5 eq.), cerium complex (**10**, 0.01 or 0.02 mmol, 5 or 10 mol%),  $\alpha\text{-CF}_3$  carboxylic acid (**1a**, 0.20 mmol, 1.0 eq.), aryl iodide (**2a**, 0.24 mmol, 1.2 eq.),  $\text{NiCl}_2 \cdot \text{DME}$  (2.2 mg, 0.01 mmol, 5 mol%), KOAc (0.2 mmol, 1.0 equiv.) and chiral ligand (**L1**) (3.4 mg, 0.015 mmol, 7.5 mol%) were added to this reaction vessel. After that, the mixture of MeCN and DMSO (9:1(v:v), 2.0 mL) were added via syringe. The reaction was irradiated with purple LEDs (15 W, 390 nm) under the vessel and electrolysis was initiated at a constant current of 2.0 mA, The temperature was kept at approximately 30°C through the use of a cooling fan. After 10 hours, the photolysis and electrolysis were terminated and the reaction was quenched with 10 mL water, then extracted with DCM (3 x 10 mL). The

combined organic phase was dried with anhydrous  $\text{Na}_2\text{SO}_4$  and concentrated under vacuum. The residue was further purified by column chromatography to afford corresponding coupling products. The enantioselectivity was determined via HPLC analysis with chiral columns.

## UV-visible absorption analysis.

UV-visible absorption spectra were recorded on an UV-2700 spectrophotometer, equipped with a temperature control unit at 25 °C. The samples were measured in Starna Fluorometer Microquartz cuvettes (volume: 1.8 ml, path length: 10 mm) equipped with a PTFE-stopper. The spectra were acquired from 300 to 800 nm using 1.0 nm steps. All measurements were performed in mixture of MeCN and DMSO (9:1) at the following concentrations: pure  $\text{CeCl}_3$  (0.1 mM), pure A4 (0.1 mM), a mixture of  $\text{CeCl}_3$  (0.1 mM) and pure A4 (0.1 mM).

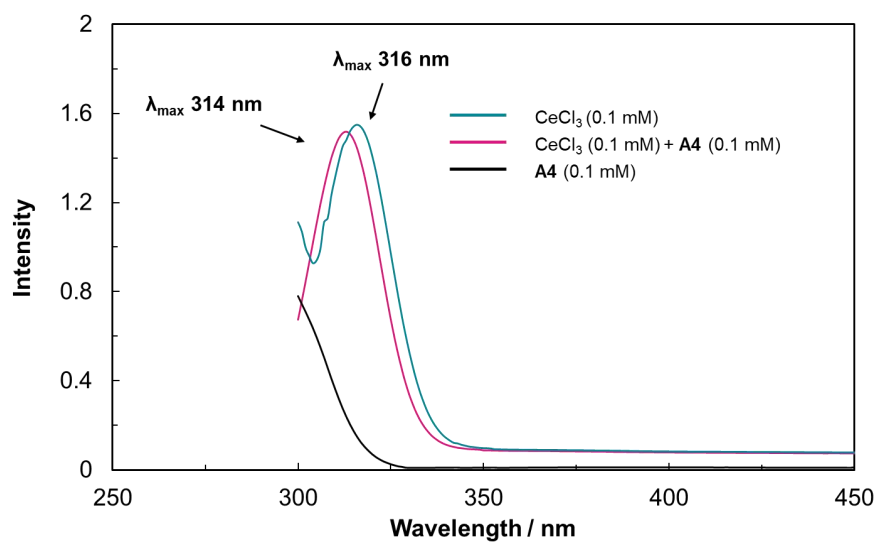

Figure S6. UV-visible absorption spectrums.

Cyclic voltammetry (CV) measurements <sup>[5-7]</sup>

General information: Cyclic voltammetry (CV) studies were performed in MeCN or MeCN/DMSO with  $n\text{-Bu}_4\text{NBF}_4$  (0.1 M) as supporting electrolyte using a glassy carbon working electrode (2.0 mm in diameter), a SCE reference electrode, and a platinum plate counter electrode. The solution of determinand was sparged with nitrogen for 5 minutes before data collection and the scan rate was 100 mV/s.

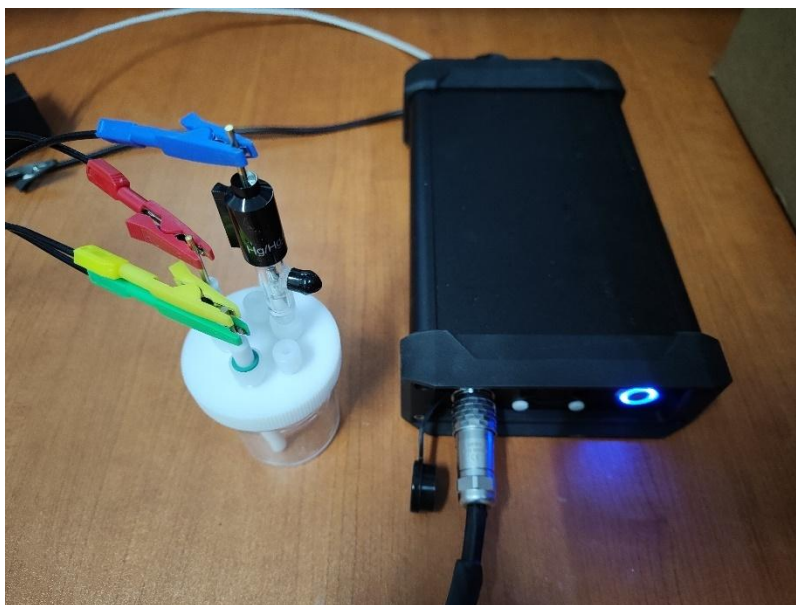

Figure S7. Cyclic voltammetry (CV) setup.

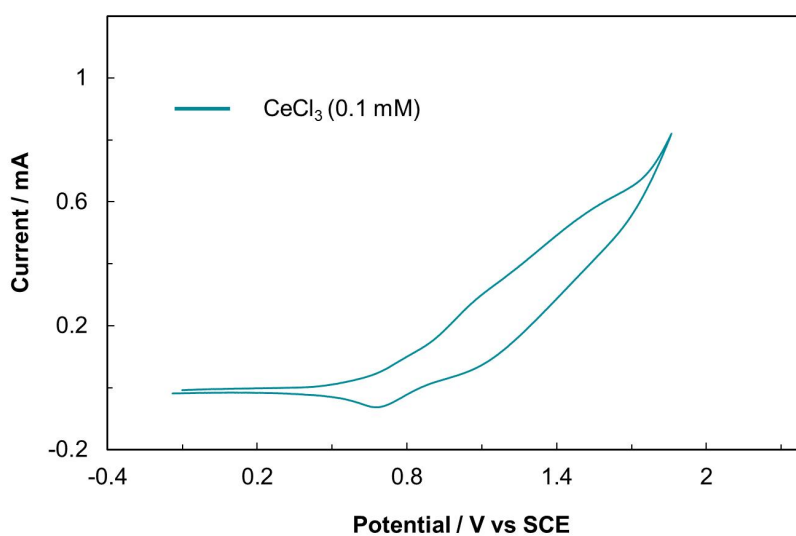

Figure S8. Cyclic voltammogram of  $\text{CeCl}_3$  in DMSO/MeCN, Conditions: DMSO/MeCN (1:9, 10 mL),  $n\text{-Bu}_4\text{BF}_4$  (0.10 M),  $\text{CeCl}_3$  (0.1 mM).

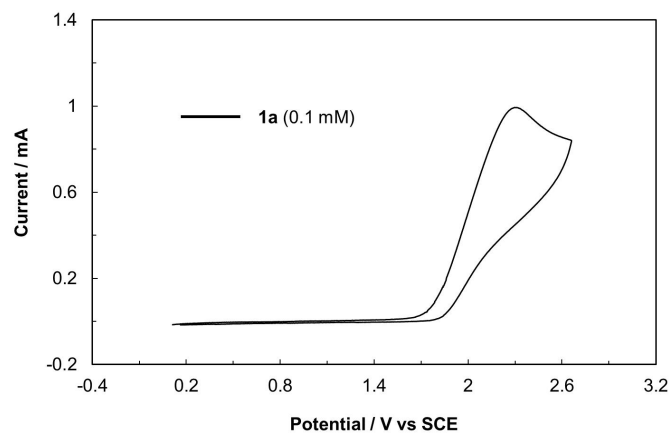

**Figure S9.** Cyclic voltammogram of **1a** in MeCN. Conditions: MeCN (10 mL), *n*-Bu<sub>4</sub>BF<sub>4</sub> (0.10 M), **1a** (0.1 mM).

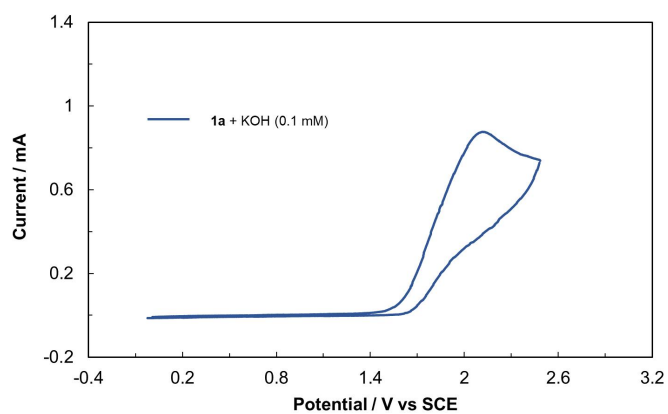

**Figure S10.** Cyclic voltammogram of **1a** in MeCN. Conditions: MeCN (10 mL), *n*-Bu<sub>4</sub>BF<sub>4</sub> (0.10 M), **1a** (0.1 mM) + KOH (0.1 mM) + 4A MS (100 mg).

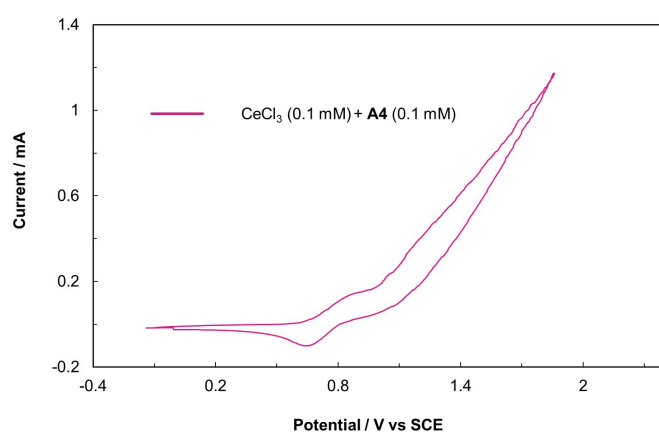

**Figure S11.** Cyclic voltammogram of **A4** and CeCl<sub>3</sub> in DMSO/MeCN. Conditions: DMSO/MeCN (1:9, 10 mL), *n*-Bu<sub>4</sub>BF<sub>4</sub> (0.10 M), **A4** (0.1 mM) and CeCl<sub>3</sub> (0.1 mM).



## HPLC Spectra

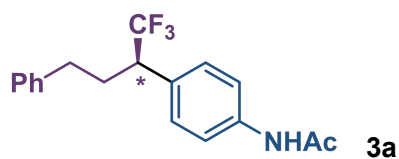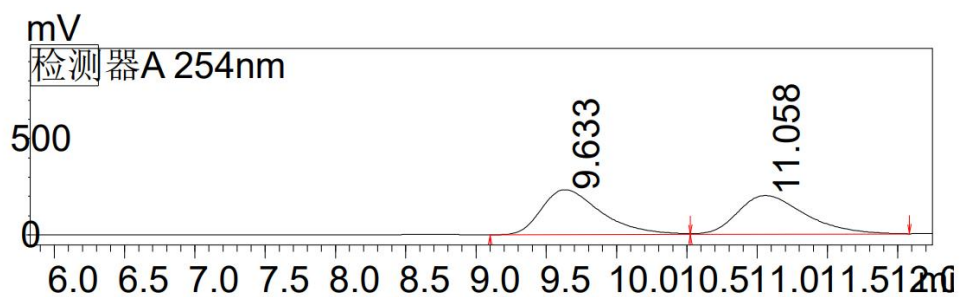

| Peak#        | Ret. Time | Area     | Height | Area%   | Height% |
|--------------|-----------|----------|--------|---------|---------|
| 1            | 9.633     | 6865246  | 233594 | 50.693  | 53.762  |
| 2            | 11.058    | 6677522  | 200899 | 49.307  | 46.238  |
| <b>Total</b> |           | 13542767 | 434493 | 100.000 | 100.000 |

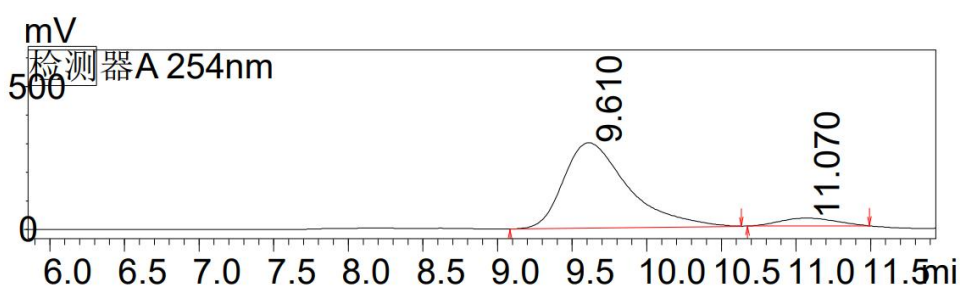

| Peak#        | Ret. Time | Area    | Height | Area%   | Height% |
|--------------|-----------|---------|--------|---------|---------|
| 1            | 9.610     | 8938333 | 298116 | 92.614  | 91.557  |
| 2            | 11.070    | 712864  | 27492  | 7.386   | 8.443   |
| <b>Total</b> |           | 9651197 | 325608 | 100.000 | 100.000 |

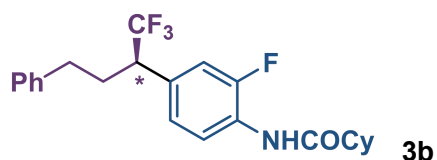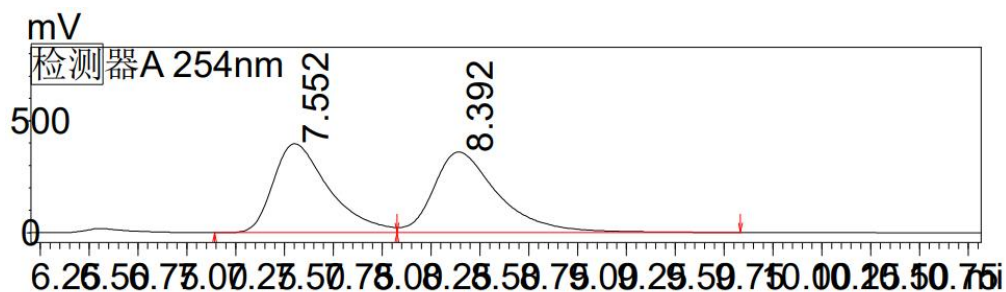

| Peak#        | Ret. Time | Area     | Height | Area%   | Height% |
|--------------|-----------|----------|--------|---------|---------|
| 1            | 7.552     | 7862218  | 396816 | 48.765  | 52.467  |
| 2            | 8.392     | 8260582  | 359495 | 51.235  | 47.533  |
| <b>Total</b> |           | 16122800 | 756311 | 100.000 | 100.000 |

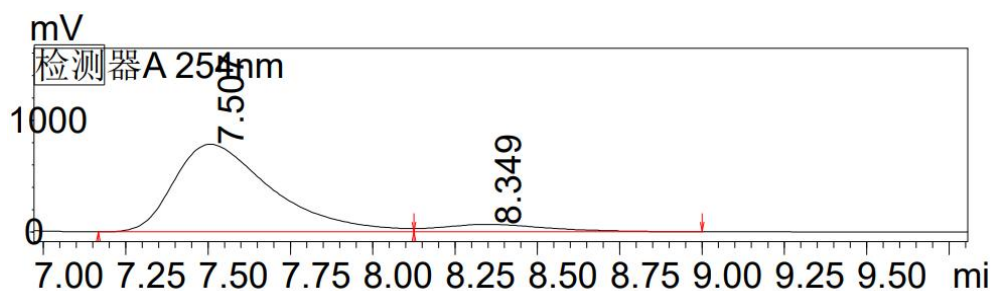

| Peak#        | Ret. Time | Area     | Height | Area%   | Height% |
|--------------|-----------|----------|--------|---------|---------|
| 1            | 7.507     | 16081870 | 780806 | 91.783  | 92.265  |
| 2            | 8.349     | 1439669  | 65461  | 8.217   | 7.735   |
| <b>Total</b> |           | 17521539 | 846267 | 100.000 | 100.000 |



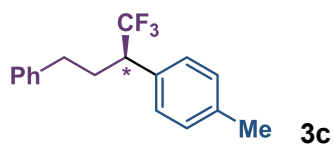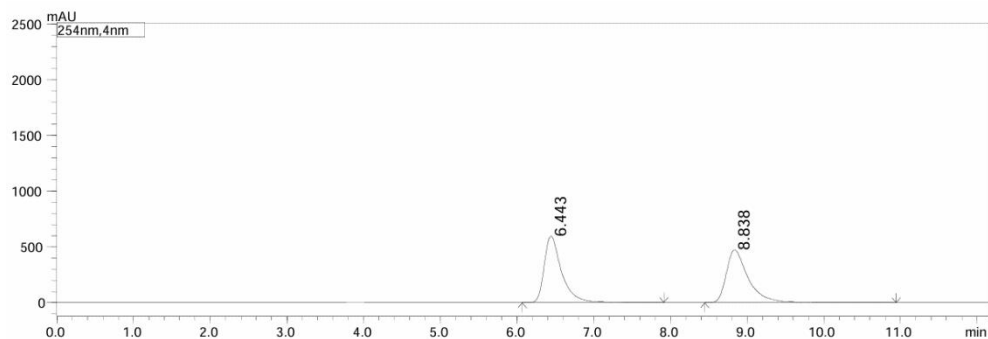

| Peak# | Ret. Time | Area     | Height  | Area%   | Height% |
|-------|-----------|----------|---------|---------|---------|
| 1     | 6.443     | 9423396  | 595380  | 50.086  | 55.738  |
| 2     | 8.838     | 9391172  | 472792  | 49.914  | 44.262  |
| Total |           | 18814568 | 1068172 | 100.000 | 100.000 |

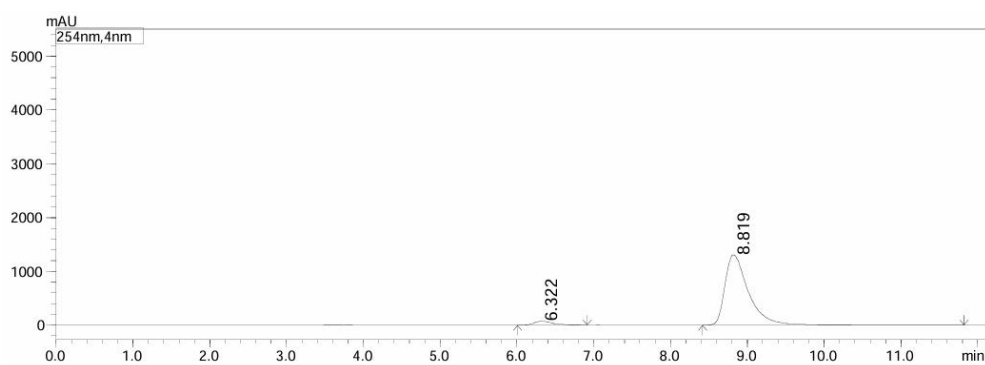

| Peak# | Ret. Time | Area     | Height  | Area%   | Height% |
|-------|-----------|----------|---------|---------|---------|
| 1     | 6.322     | 1207148  | 74511   | 4.160   | 5.385   |
| 2     | 8.819     | 27813321 | 1309056 | 95.840  | 94.615  |
| Total |           | 29020468 | 1383567 | 100.000 | 100.000 |

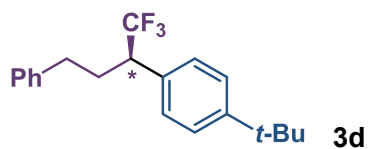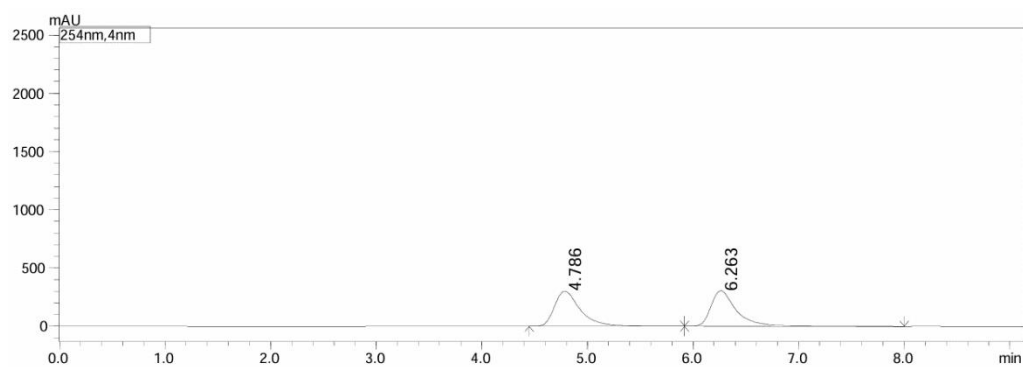

| Peak# | Ret. Time | Area     | Height | Area%   | Height% |
|-------|-----------|----------|--------|---------|---------|
| 1     | 4.786     | 5108101  | 299746 | 50.047  | 49.551  |
| 2     | 6.263     | 5098554  | 305184 | 49.953  | 50.449  |
| Total |           | 10206655 | 604930 | 100.000 | 100.000 |

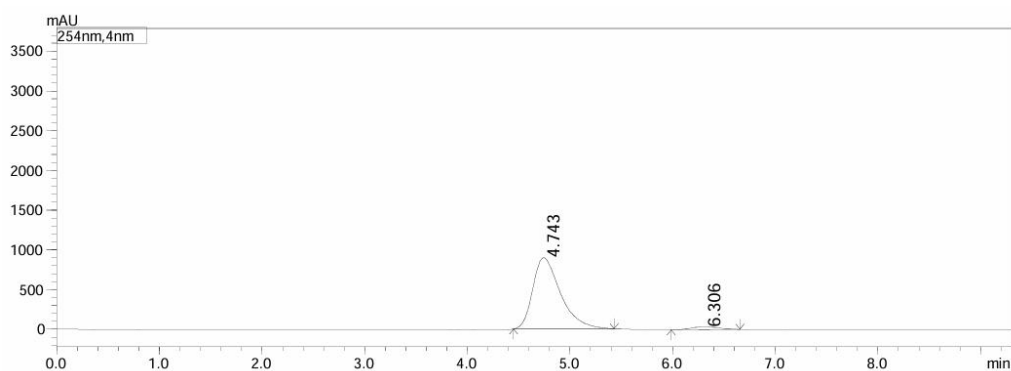

| Peak# | Ret. Time | Area     | Height | Area%   | Height% |
|-------|-----------|----------|--------|---------|---------|
| 1     | 4.743     | 14813494 | 659440 | 92.308  | 91.173  |
| 2     | 6.306     | 1234458  | 63844  | 7.692   | 8.827   |
| Total |           | 16047952 | 723284 | 100.000 | 100.000 |

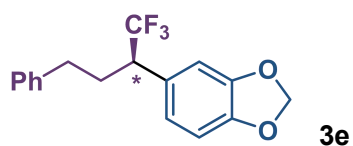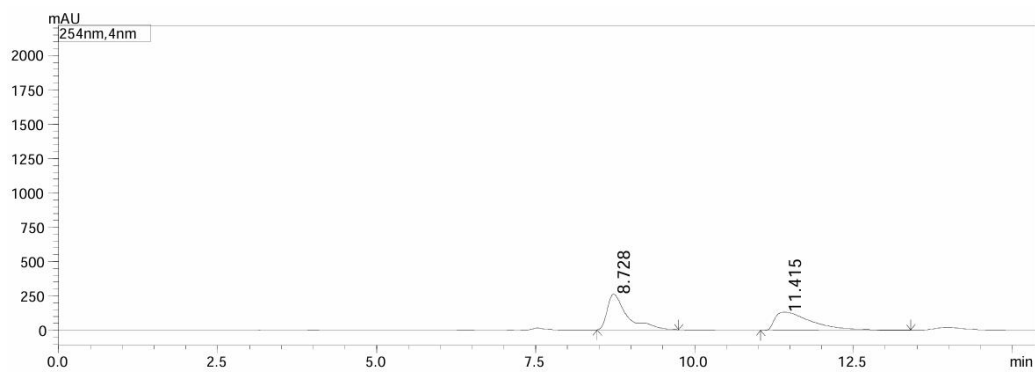

| Peak# | Ret. Time | Area     | Height | Area%   | Height% |
|-------|-----------|----------|--------|---------|---------|
| 1     | 8.728     | 5641162  | 259830 | 51.730  | 66.247  |
| 2     | 11.415    | 5263889  | 132382 | 48.270  | 33.753  |
| Total |           | 10905051 | 392211 | 100.000 | 100.000 |

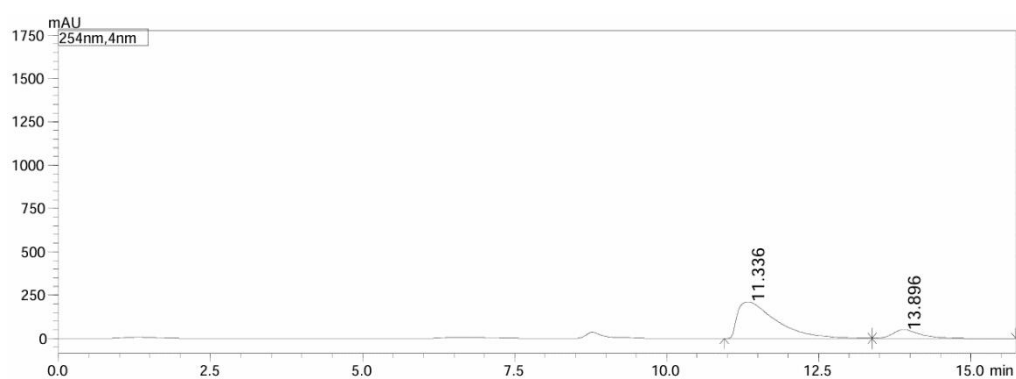

| Peak# | Ret. Time | Area     | Height | Area%   | Height% |
|-------|-----------|----------|--------|---------|---------|
| 1     | 8.725     | 805873   | 28363  | 7.962   | 11.845  |
| 2     | 11.336    | 9315642  | 211085 | 92.038  | 88.155  |
| Total |           | 10121515 | 239448 | 100.000 | 100.000 |

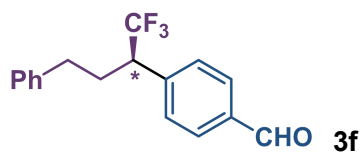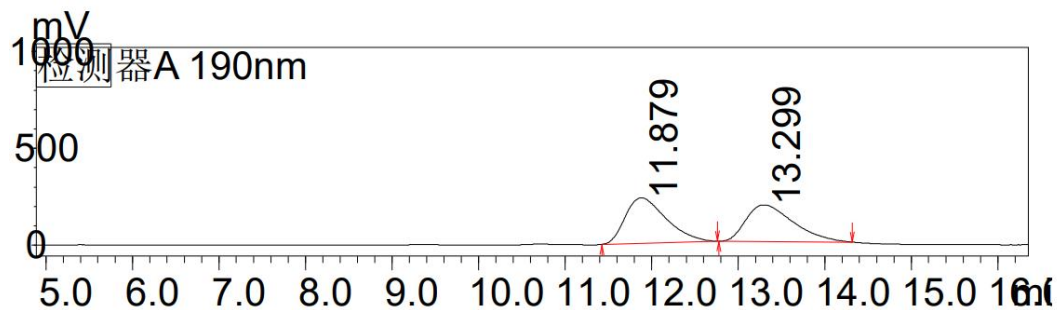

| Peak# | Ret. Time | Area     | Height | Area%   | Height% |
|-------|-----------|----------|--------|---------|---------|
| 1     | 11.879    | 7729796  | 234973 | 51.606  | 55.305  |
| 2     | 13.299    | 7248637  | 189893 | 48.394  | 44.695  |
| Total |           | 14978433 | 424866 | 100.000 | 100.000 |

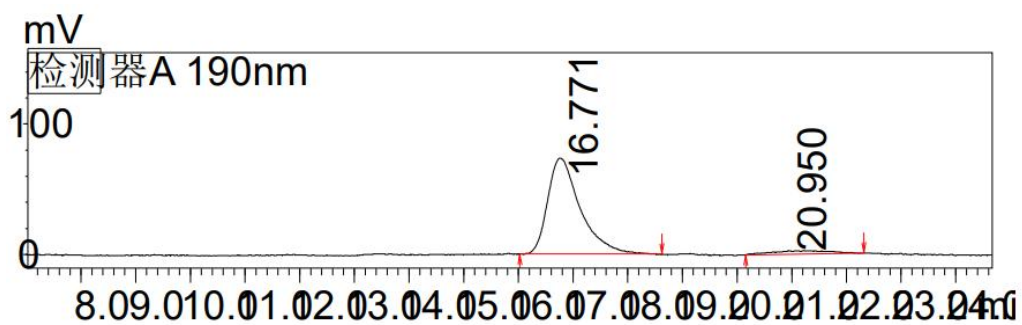

| Peak# | Ret. Time | Area    | Height | Area%   | Height% |
|-------|-----------|---------|--------|---------|---------|
| 1     | 16.771    | 3040788 | 73458  | 94.310  | 96.465  |
| 2     | 20.950    | 183469  | 2692   | 5.690   | 3.535   |
| Total |           | 3224257 | 76149  | 100.000 | 100.000 |

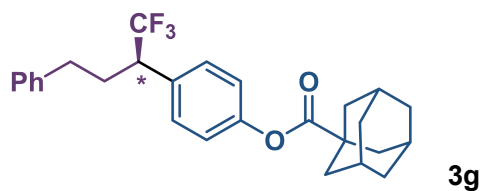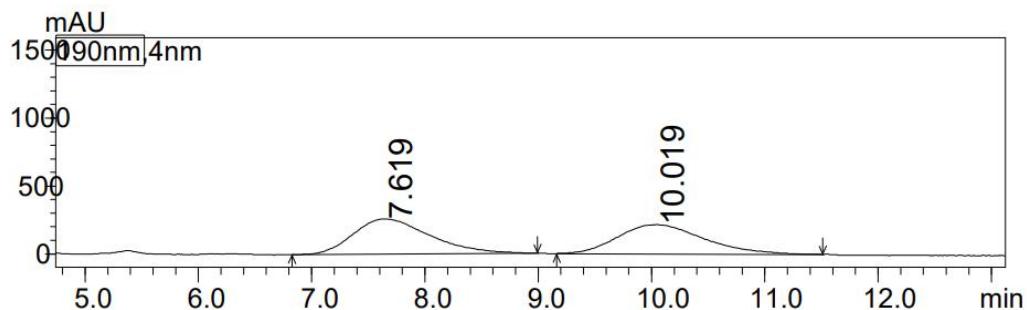

| Peak# | Ret. Time | Area     | Height | Area%   | Height% |
|-------|-----------|----------|--------|---------|---------|
| 1     | 7.619     | 12336330 | 260117 | 51.886  | 54.781  |
| 2     | 10.019    | 11439501 | 214716 | 48.114  | 45.219  |
| Total |           | 23775831 | 474833 | 100.000 | 100.000 |

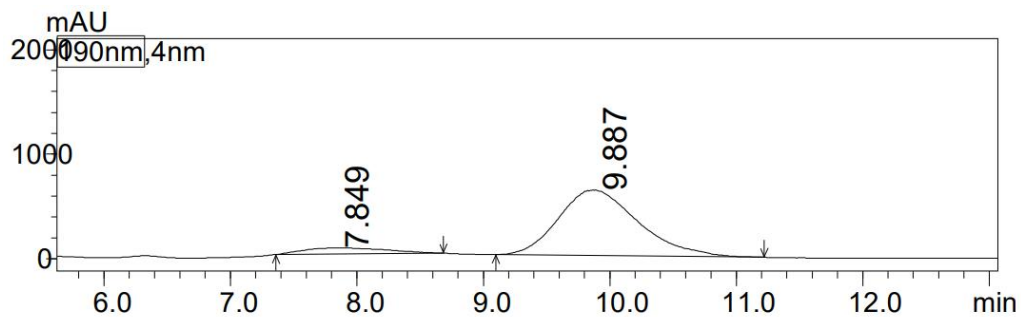

| Peak# | Ret. Time | Area     | Height | Area%   | Height% |
|-------|-----------|----------|--------|---------|---------|
| 1     | 7.849     | 2656313  | 60168  | 8.817   | 8.746   |
| 2     | 9.887     | 27469731 | 627794 | 91.183  | 91.254  |
| Total |           | 30126044 | 687962 | 100.000 | 100.000 |

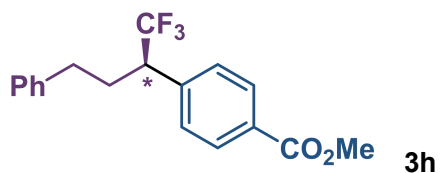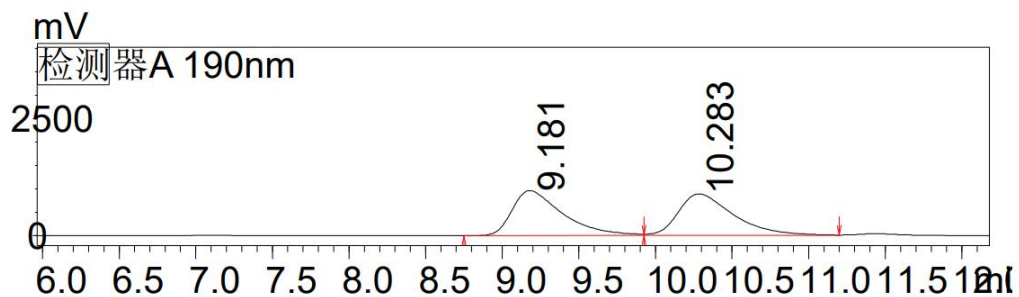

| Peak# | Ret. Time | Area     | Height  | Area%   | Height% |
|-------|-----------|----------|---------|---------|---------|
| 1     | 9.181     | 21910118 | 959007  | 50.010  | 51.983  |
| 2     | 10.283    | 21901324 | 885828  | 49.990  | 48.017  |
| Total |           | 43811441 | 1844834 | 100.000 | 100.000 |

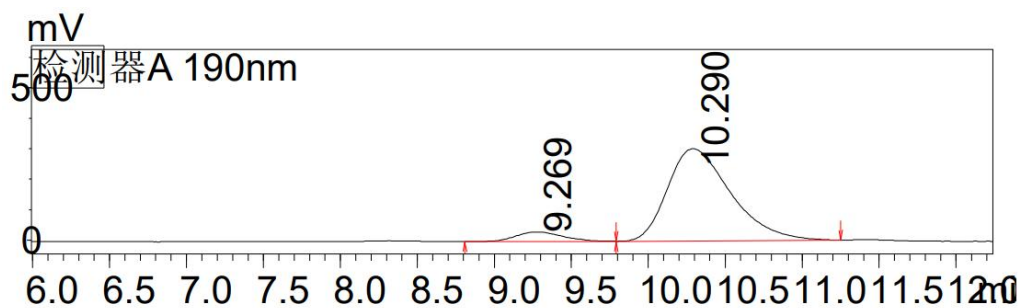

| Peak# | Ret. Time | Area    | Height | Area%   | Height% |
|-------|-----------|---------|--------|---------|---------|
| 1     | 9.269     | 661551  | 31483  | 7.103   | 9.411   |
| 2     | 10.290    | 8651578 | 303042 | 92.897  | 90.589  |
| Total |           | 9313129 | 334525 | 100.000 | 100.000 |

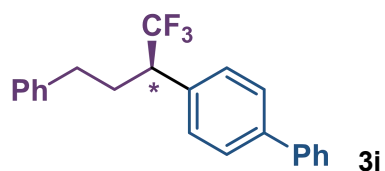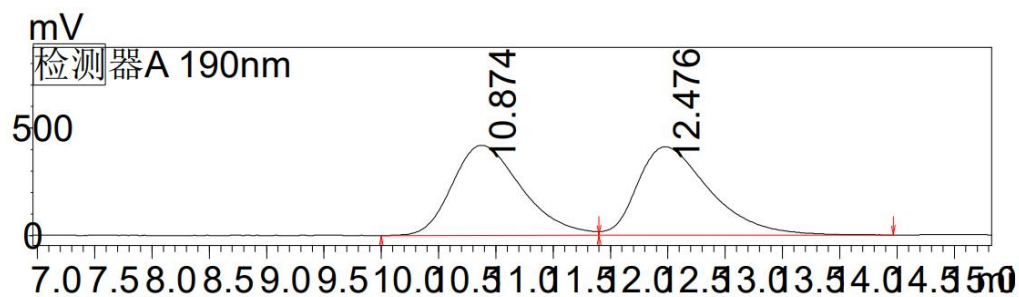

| Peak# | Ret. Time | Area     | Height | Area%   | Height% |
|-------|-----------|----------|--------|---------|---------|
| 1     | 10.874    | 17637039 | 418243 | 49.384  | 50.458  |
| 2     | 12.476    | 18077036 | 410647 | 50.616  | 49.542  |
| Total |           | 35714075 | 828890 | 100.000 | 100.000 |

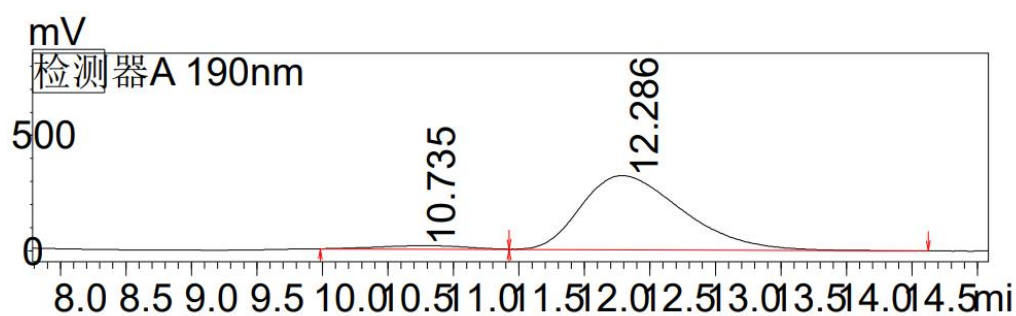

| Peak# | Ret. Time | Area     | Height | Area%   | Height% |
|-------|-----------|----------|--------|---------|---------|
| 1     | 10.735    | 725434   | 15595  | 4.002   | 4.627   |
| 2     | 12.286    | 17400117 | 321484 | 95.998  | 95.373  |
| Total |           | 18125550 | 337079 | 100.000 | 100.000 |

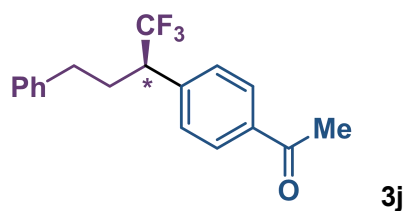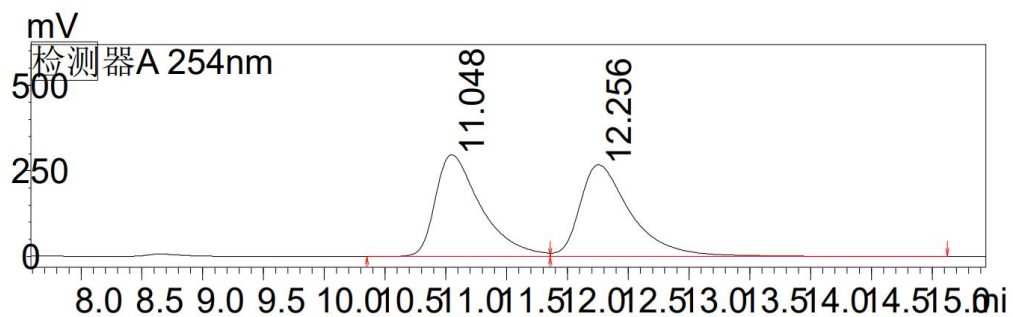

| Peak# | Ret. Time | Area     | Height | Area%   | Height% |
|-------|-----------|----------|--------|---------|---------|
| 1     | 11.048    | 7735513  | 296646 | 49.782  | 52.590  |
| 2     | 12.256    | 7803181  | 267428 | 50.218  | 47.410  |
| Total |           | 15538694 | 564074 | 100.000 | 100.000 |

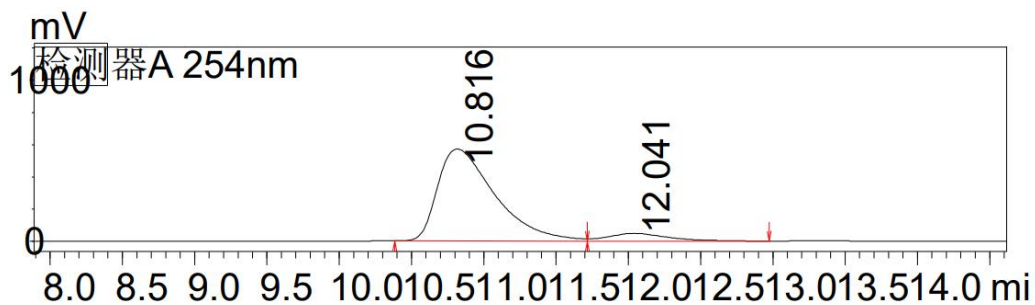

| Peak# | Ret. Time | Area     | Height | Area%   | Height% |
|-------|-----------|----------|--------|---------|---------|
| 1     | 10.816    | 15753223 | 570279 | 92.117  | 92.344  |
| 2     | 12.041    | 1348018  | 47279  | 7.883   | 7.656   |
| Total |           | 1760653  | 63584  | 100.000 | 100.000 |



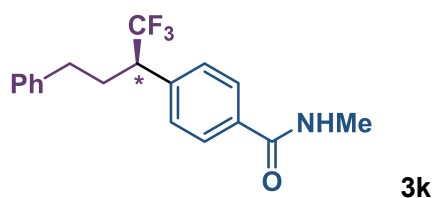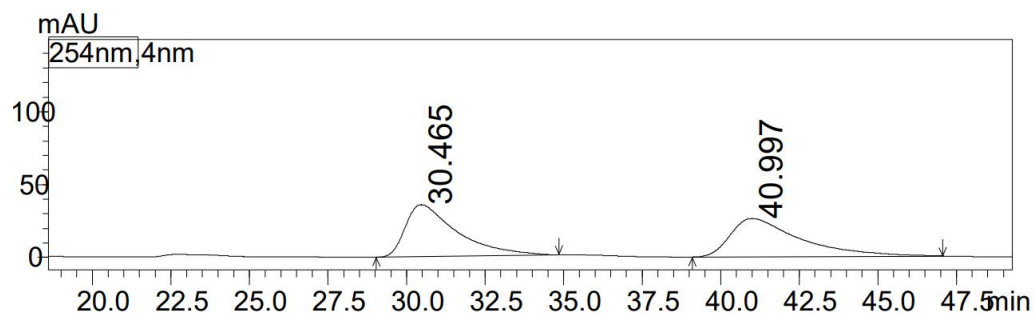

| Peak# | Ret. Time | Area    | Height | Area%   | Height% |
|-------|-----------|---------|--------|---------|---------|
| 1     | 30.465    | 4053445 | 35737  | 50.077  | 57.609  |
| 2     | 40.997    | 4040948 | 26296  | 49.923  | 42.391  |
| Total |           | 8094393 | 62033  | 100.000 | 100.000 |

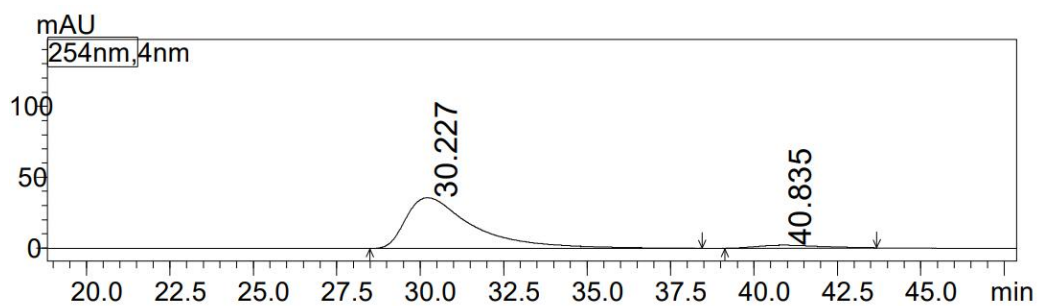

| Peak# | Ret. Time | Area    | Height | Area%   | Height% |
|-------|-----------|---------|--------|---------|---------|
| 1     | 30.227    | 5020960 | 35788  | 95.002  | 94.686  |
| 2     | 40.835    | 264123  | 2008   | 4.998   | 5.314   |
| Total |           | 5285083 | 37796  | 100.000 | 100.000 |

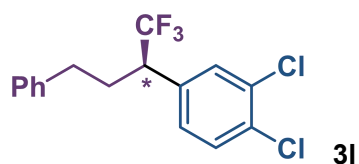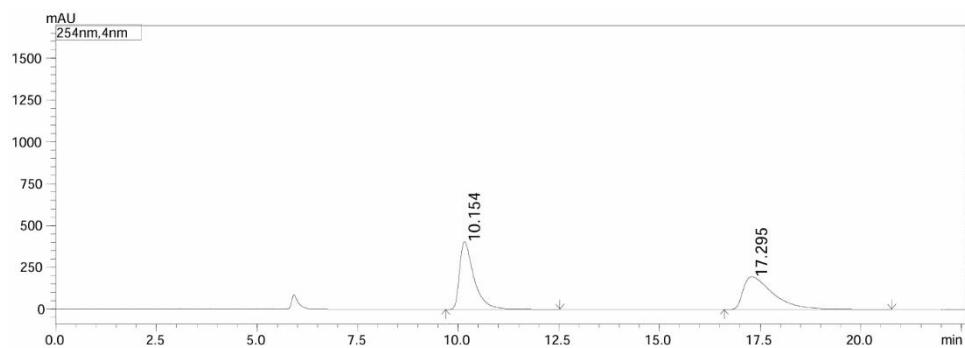

| Peak#        | Ret. Time | Area     | Height | Area%   | Height% |
|--------------|-----------|----------|--------|---------|---------|
| 1            | 10.154    | 10030065 | 403851 | 49.965  | 67.517  |
| 2            | 17.295    | 10044058 | 194300 | 50.035  | 32.483  |
| <b>Total</b> |           | 20074123 | 598150 | 100.000 | 100.000 |

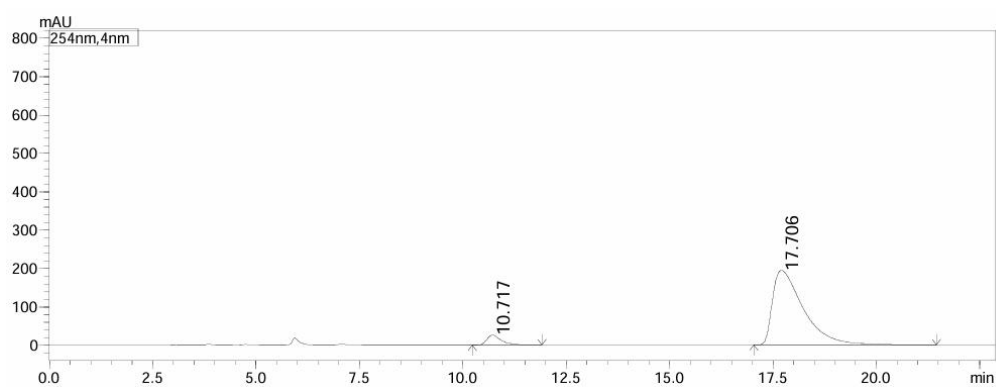

| Peak#        | Ret. Time | Area     | Height | Area%   | Height% |
|--------------|-----------|----------|--------|---------|---------|
| 1            | 10.717    | 631638   | 25864  | 5.903   | 11.761  |
| 2            | 17.706    | 10069447 | 194050 | 94.097  | 88.239  |
| <b>Total</b> |           | 10701085 | 219913 | 100.000 | 100.000 |

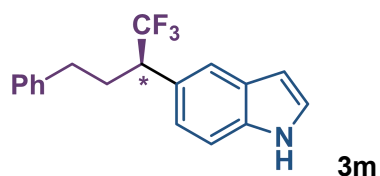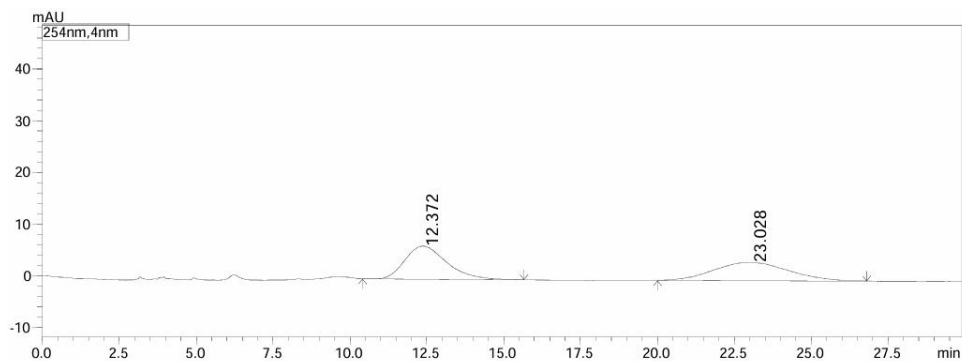

| Peak#        | Ret. Time | Area    | Height | Area%   | Height% |
|--------------|-----------|---------|--------|---------|---------|
| 1            | 12.372    | 599826  | 6385   | 50.066  | 64.309  |
| 2            | 23.028    | 598255  | 3544   | 49.934  | 43.521  |
| <b>Total</b> |           | 1198081 | 9928   | 100.000 | 100.000 |

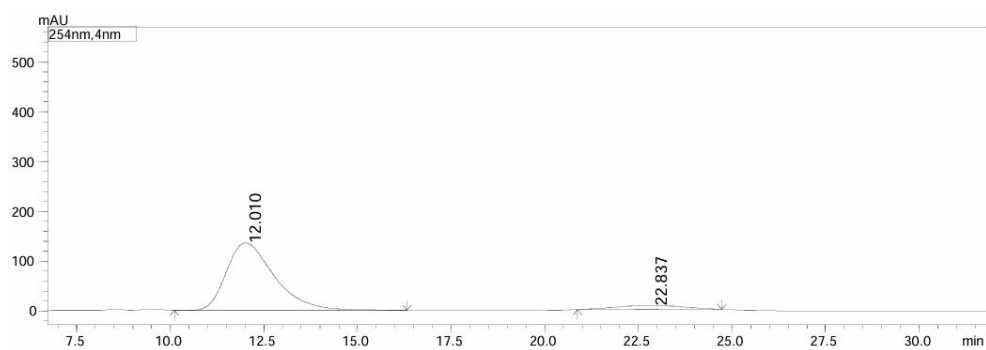

| Peak#        | Ret. Time | Area     | Height | Area%   | Height% |
|--------------|-----------|----------|--------|---------|---------|
| 1            | 12.010    | 12111348 | 135354 | 91.858  | 94.257  |
| 2            | 22.837    | 1073541  | 8247   | 8.142   | 5.743   |
| <b>Total</b> |           | 13184889 | 143602 | 100.000 | 100.000 |

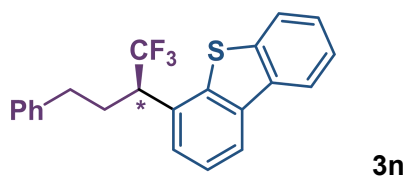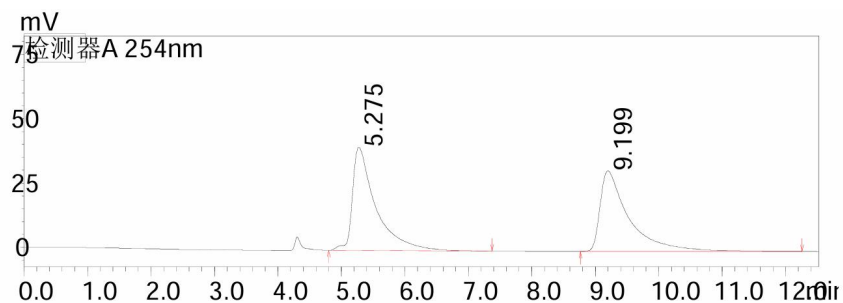

| Peak# | Ret. Time | Area    | Height | Area%   | Height% |
|-------|-----------|---------|--------|---------|---------|
| 1     | 5.275     | 1030687 | 40185  | 50.989  | 56.236  |
| 2     | 9.199     | 990687  | 31273  | 49.011  | 43.764  |
| Total |           | 2021374 | 71458  | 100.000 | 100.000 |

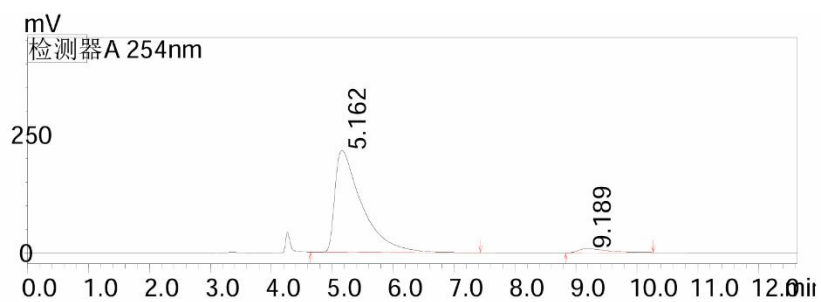

| Peak# | Ret. Time | Area    | Height | Area%   | Height% |
|-------|-----------|---------|--------|---------|---------|
| 1     | 5.162     | 6258466 | 216138 | 91.032  | 94.235  |
| 2     | 9.189     | 692902  | 9062   | 8.968   | 5.765   |
| Total |           | 6951368 | 225200 | 100.000 | 100.000 |

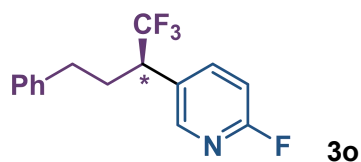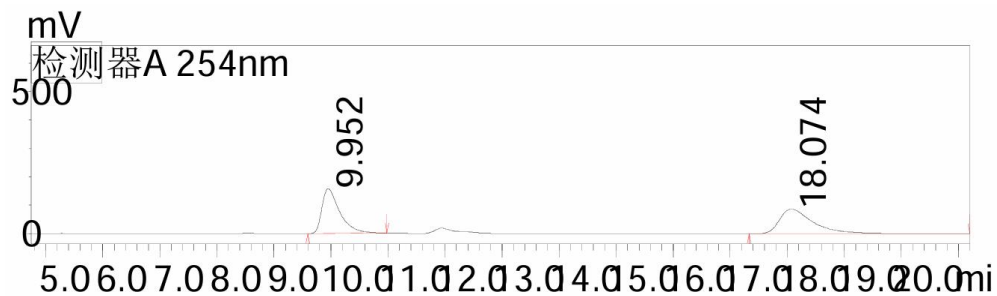

| Peak# | Ret. Time | Area    | Height | Area%   | Height% |
|-------|-----------|---------|--------|---------|---------|
| 1     | 9.952     | 3411667 | 158114 | 49.265  | 64.666  |
| 2     | 18.074    | 3513481 | 86394  | 50.735  | 35.334  |
| Total |           | 6925147 | 244508 | 100.000 | 100.000 |

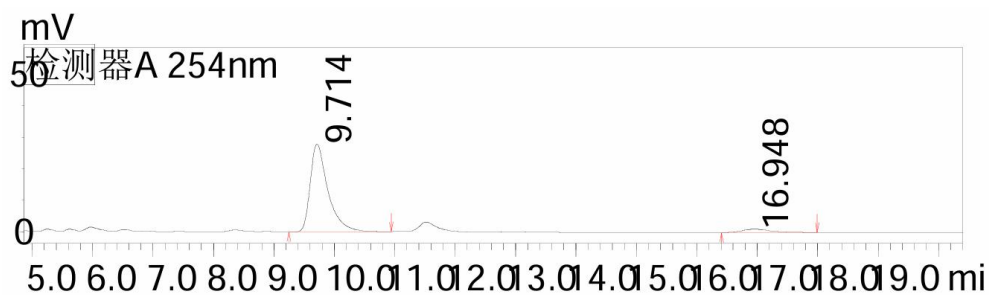

| Peak# | Ret. Time | Area   | Height | Area%   | Height% |
|-------|-----------|--------|--------|---------|---------|
| 1     | 9.714     | 567097 | 27866  | 93.948  | 96.166  |
| 2     | 16.948    | 36531  | 1111   | 6.052   | 3.834   |
| Total |           | 603627 | 28976  | 100.000 | 100.000 |

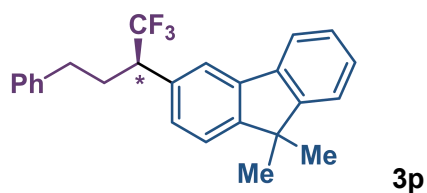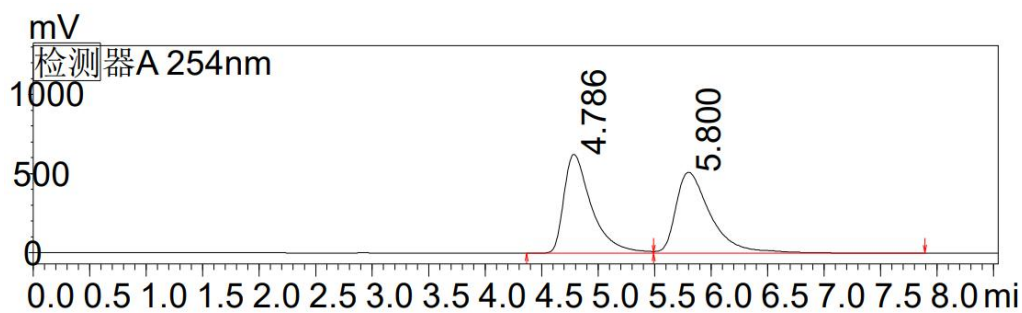

| Peak# | Ret. Time | Area     | Height  | Area%   | Height% |
|-------|-----------|----------|---------|---------|---------|
| 1     | 4.786     | 10565591 | 622637  | 49.258  | 54.993  |
| 2     | 5.800     | 10883805 | 509574  | 50.742  | 45.007  |
| Total |           | 21449396 | 1132211 | 100.000 | 100.000 |

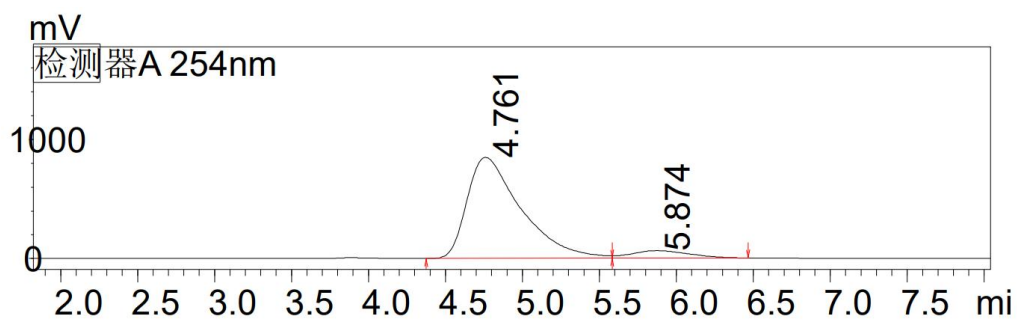

| Peak# | Ret. Time | Area     | Height | Area%   | Height% |
|-------|-----------|----------|--------|---------|---------|
| 1     | 4.761     | 20670690 | 846785 | 92.873  | 93.211  |
| 2     | 5.874     | 1586146  | 61678  | 7.127   | 6.789   |
| Total |           | 22256835 | 908463 | 100.000 | 100.000 |

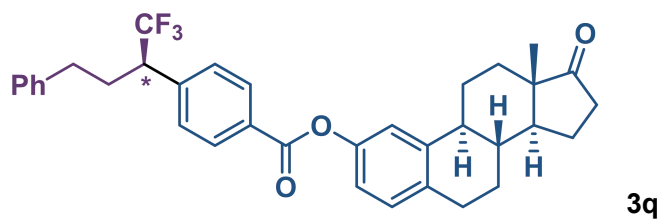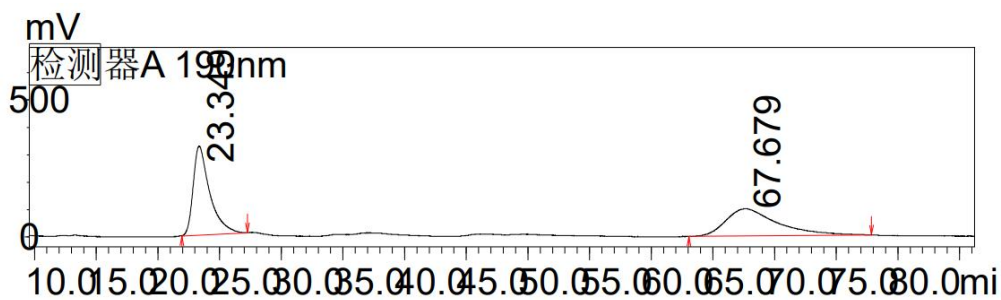

| Peak# | Ret. Time | Area     | Height | Area%   | Height% |
|-------|-----------|----------|--------|---------|---------|
| 1     | 23.349    | 30224940 | 324725 | 50.963  | 76.533  |
| 2     | 67.679    | 29083077 | 99572  | 49.037  | 23.467  |
| Total |           | 59308017 | 424297 | 100.000 | 100.000 |

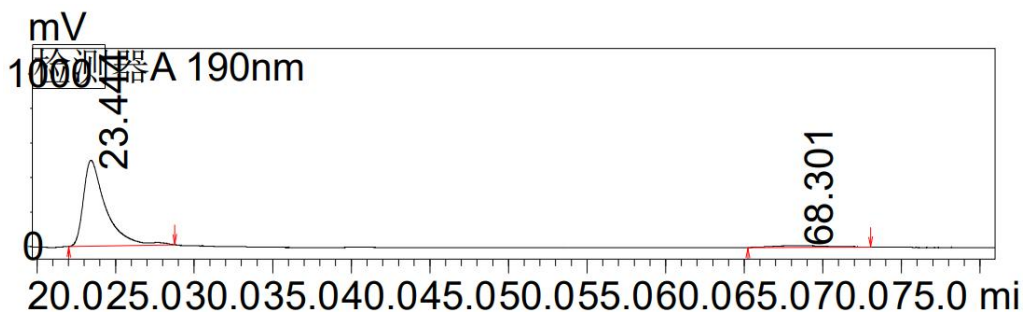

| Peak# | Ret. Time | Area     | Height | Area%   | Height% |
|-------|-----------|----------|--------|---------|---------|
| 1     | 23.444    | 49244364 | 496570 | 95.515  | 97.964  |
| 2     | 68.301    | 2312188  | 10323  | 4.485   | 2.036   |
| Total |           | 51556552 | 506893 | 100.000 | 100.000 |

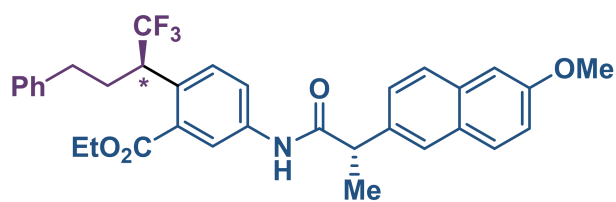

3r

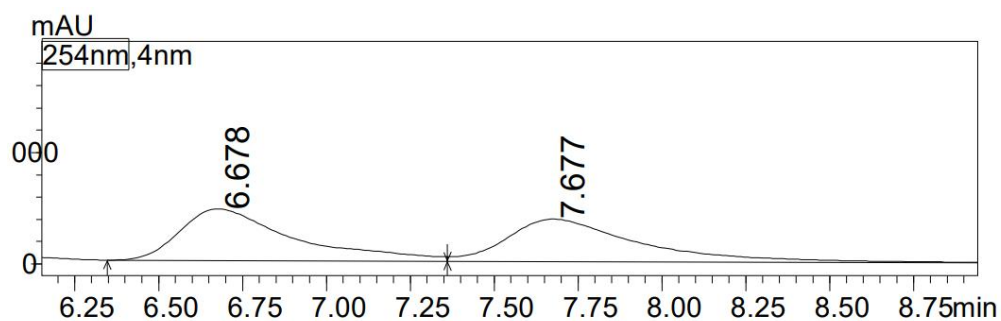

| Peak# | Ret. Time | Area     | Height | Area%   | Height% |
|-------|-----------|----------|--------|---------|---------|
| 1     | 6.678     | 10849222 | 462187 | 51.158  | 54.921  |
| 2     | 7.677     | 10357866 | 379357 | 48.842  | 45.079  |
| Total |           | 21207088 | 841544 | 100.000 | 100.000 |

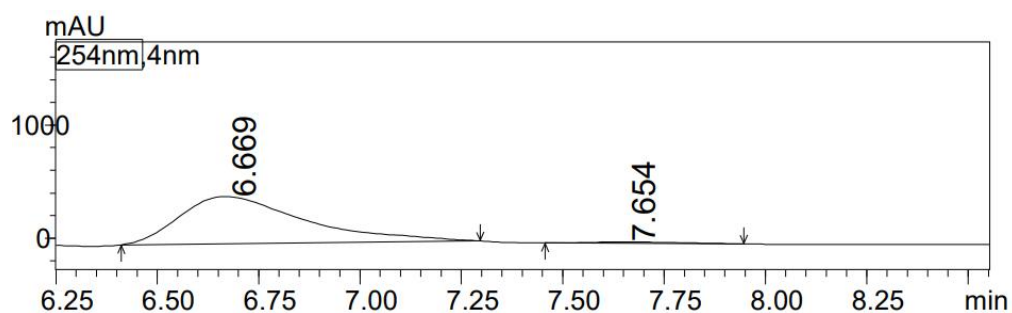

| Peak# | Ret. Time | Area    | Height | Area%   | Height% |
|-------|-----------|---------|--------|---------|---------|
| 1     | 6.669     | 8957389 | 416899 | 97.666  | 96.761  |
| 2     | 7.654     | 214040  | 13958  | 2.334   | 3.239   |
| Total |           | 9171430 | 430856 | 100.000 | 100.000 |



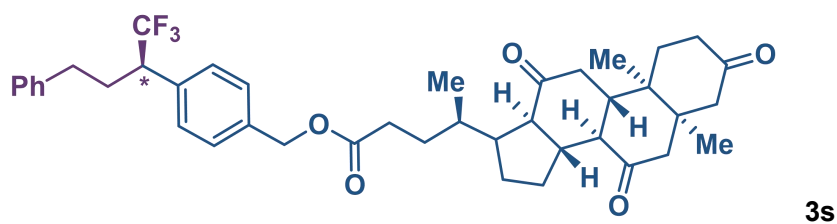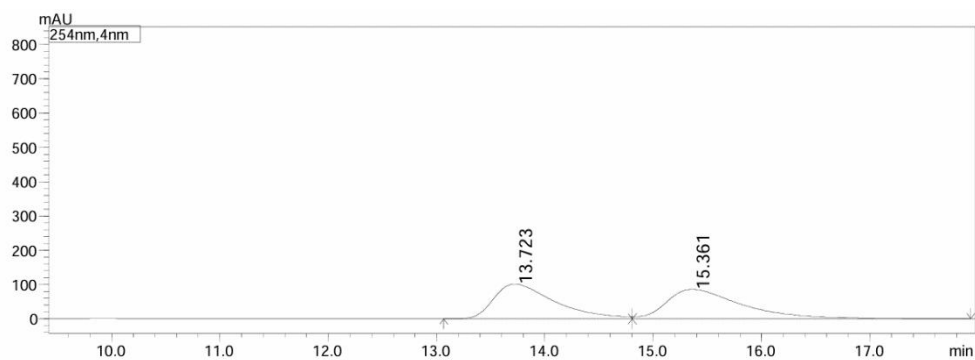

| Peak# | Ret. Time | Area    | Height | Area%   | Height% |
|-------|-----------|---------|--------|---------|---------|
| 1     | 13.723    | 3960091 | 101410 | 48.888  | 54.117  |
| 2     | 15.361    | 4140293 | 85981  | 51.112  | 45.883  |
| Total |           | 8100384 | 187391 | 100.000 | 100.000 |

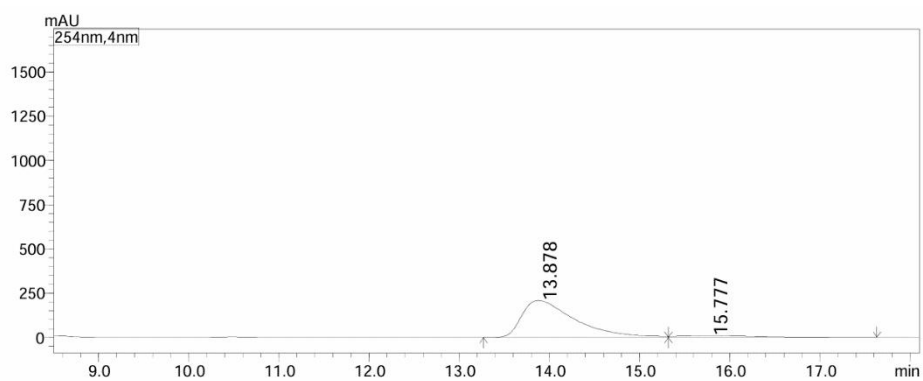

| Peak# | Ret. Time | Area    | Height | Area%   | Height% |
|-------|-----------|---------|--------|---------|---------|
| 1     | 13.878    | 8519324 | 209790 | 93.442  | 94.742  |
| 2     | 15.777    | 597941  | 11642  | 6.558   | 5.258   |
| Total |           | 9117265 | 221432 | 100.000 | 100.000 |

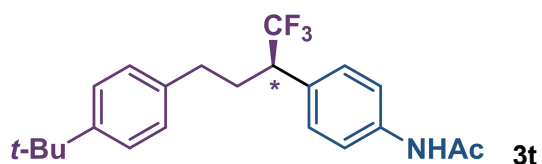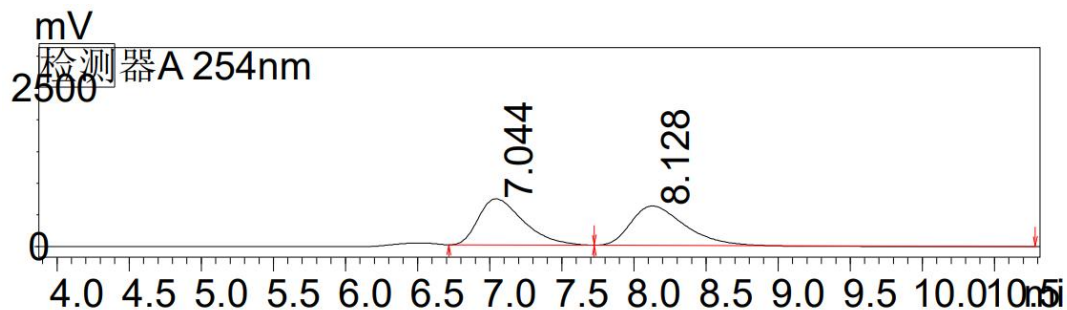

| Peak# | Ret. Time | Area     | Height  | Area%   | Height% |
|-------|-----------|----------|---------|---------|---------|
| 1     | 7.044     | 15699397 | 725421  | 50.079  | 53.864  |
| 2     | 8.128     | 15649673 | 621332  | 49.921  | 46.136  |
| Total |           | 31349070 | 1346753 | 100.000 | 100.000 |

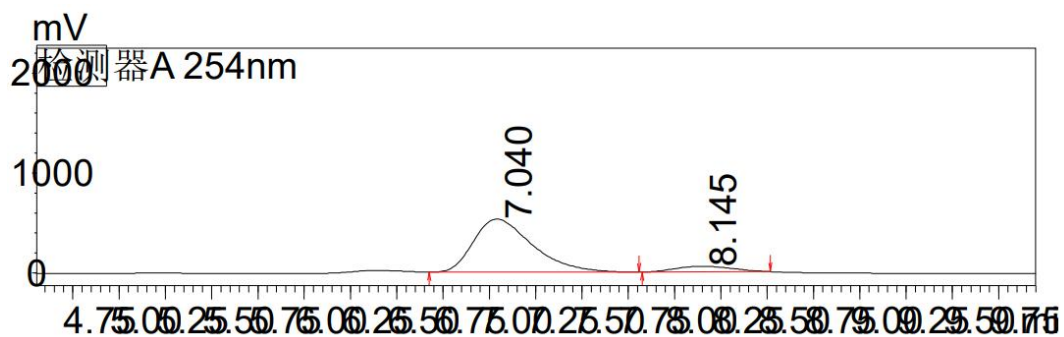

| Peak# | Ret. Time | Area     | Height | Area%   | Height% |
|-------|-----------|----------|--------|---------|---------|
| 1     | 7.040     | 11731600 | 530453 | 90.781  | 90.358  |
| 2     | 8.145     | 1191429  | 56603  | 9.219   | 9.642   |
| Total |           | 12923030 | 587057 | 100.000 | 100.000 |

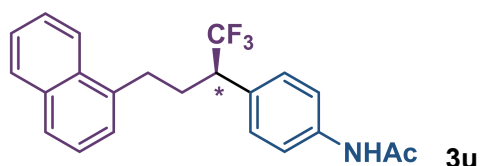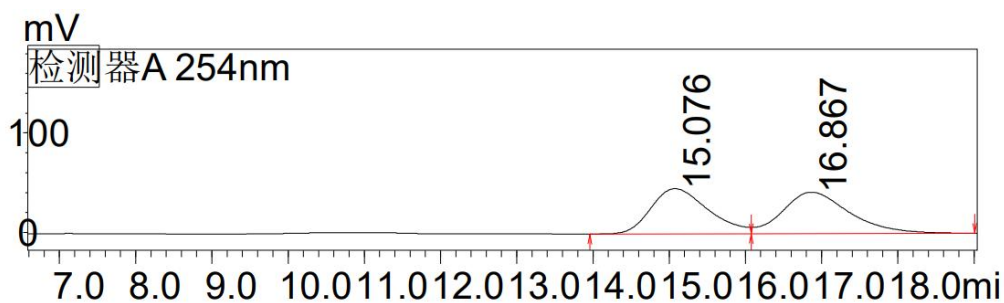

| Peak# | Ret. Time | Area    | Height | Area%   | Height% |
|-------|-----------|---------|--------|---------|---------|
| 1     | 15.076    | 2380556 | 45479  | 48.249  | 52.098  |
| 2     | 16.867    | 2553386 | 41816  | 51.751  | 47.902  |
| Total |           | 4933942 | 87295  | 100.000 | 100.000 |

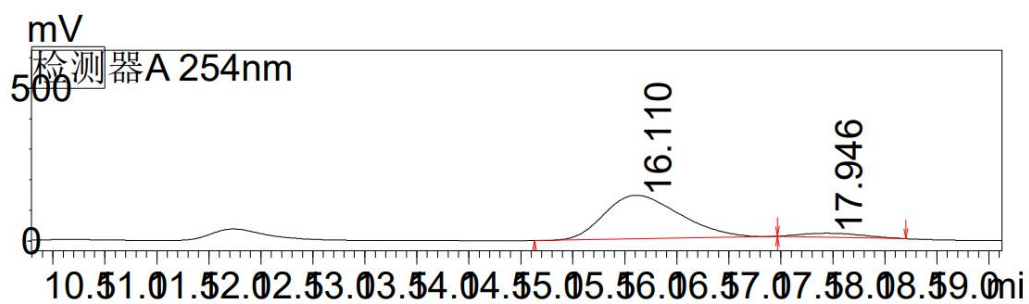

| Peak# | Ret. Time | Area    | Height | Area%   | Height% |
|-------|-----------|---------|--------|---------|---------|
| 1     | 16.110    | 7175377 | 142597 | 93.032  | 91.622  |
| 2     | 17.946    | 537399  | 13039  | 6.968   | 8.378   |
| Total |           | 7712777 | 155636 | 100.000 | 100.000 |

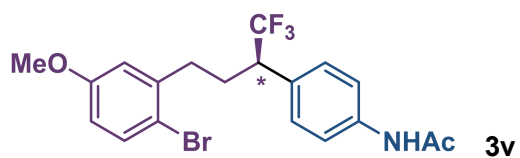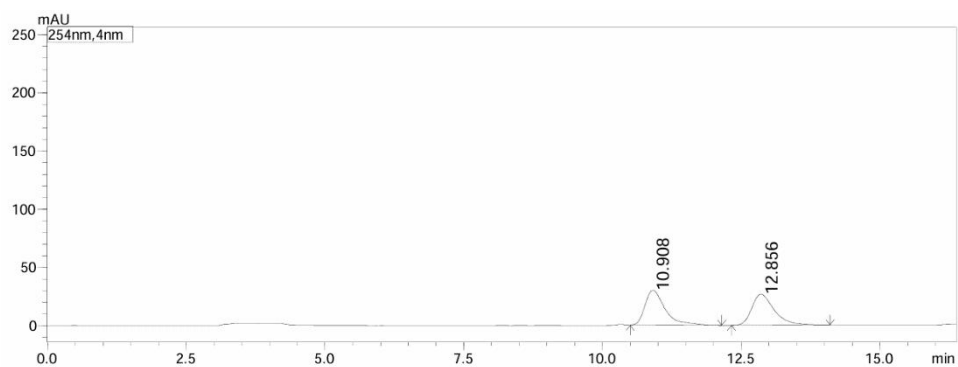

| Peak# | Ret. Time | Area    | Height | Area%   | Height% |
|-------|-----------|---------|--------|---------|---------|
| 1     | 10.908    | 746137  | 29935  | 50.274  | 53.023  |
| 2     | 12.856    | 738010  | 26522  | 49.726  | 46.977  |
| Total |           | 1484146 | 56457  | 100.000 | 100.000 |

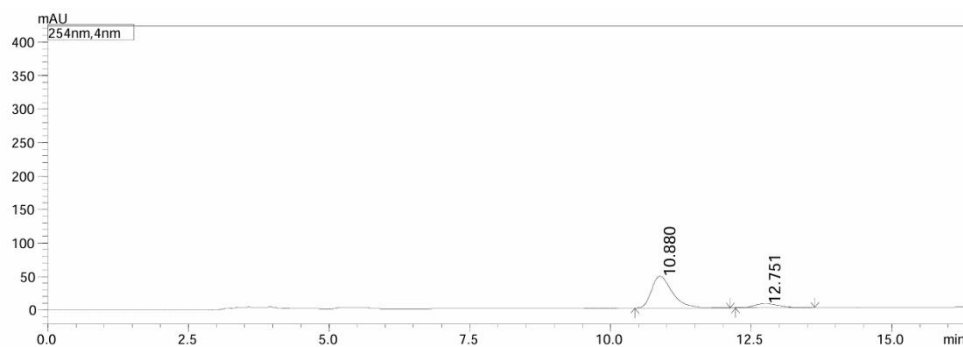

| Peak# | Ret. Time | Area    | Height | Area%   | Height% |
|-------|-----------|---------|--------|---------|---------|
| 1     | 10.880    | 1218393 | 47560  | 86.512  | 88.365  |
| 2     | 12.751    | 189961  | 6262   | 13.488  | 11.635  |
| Total |           | 1408355 | 53822  | 100.000 | 100.000 |

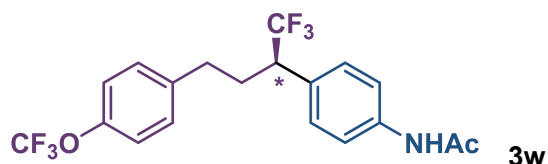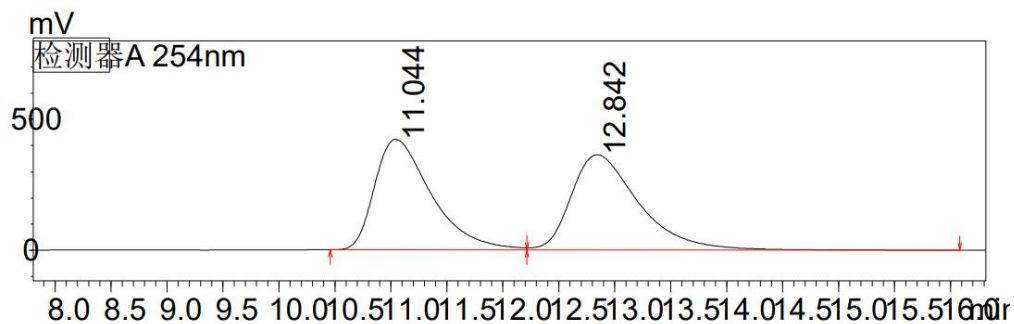

| Peak# | Ret. Time | Area     | Height | Area%   | Height% |
|-------|-----------|----------|--------|---------|---------|
| 1     | 11.044    | 14865572 | 421887 | 49.238  | 53.704  |
| 2     | 12.842    | 15325585 | 363685 | 50.762  | 46.296  |
| Total |           | 30191157 | 785573 | 100.000 | 100.000 |

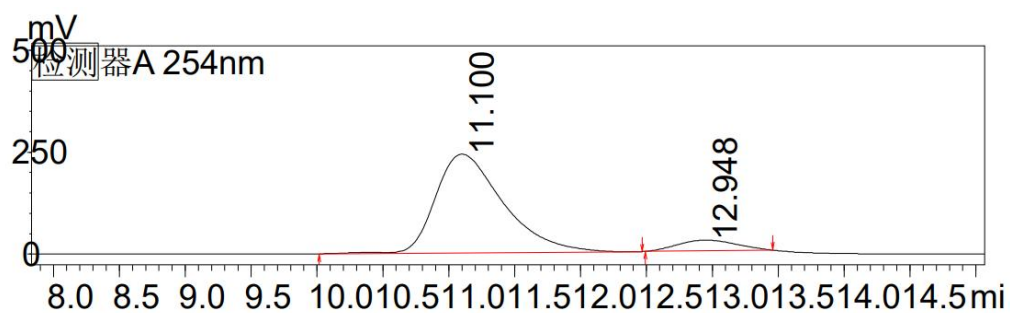

| Peak# | Ret. Time | Area    | Height | Area%   | Height% |
|-------|-----------|---------|--------|---------|---------|
| 1     | 11.100    | 8630566 | 242068 | 91.432  | 90.238  |
| 2     | 12.948    | 808730  | 26188  | 8.568   | 9.762   |
| Total |           | 9439296 | 268256 | 100.000 | 100.000 |

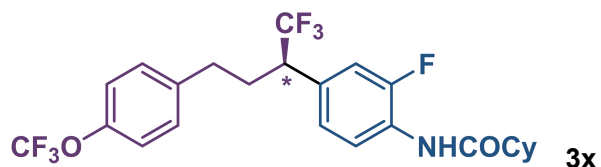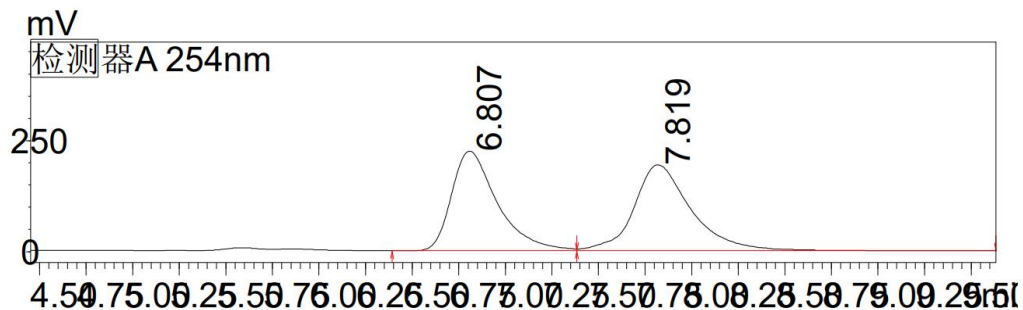

| Peak# | Ret. Time | Area    | Height | Area%   | Height% |
|-------|-----------|---------|--------|---------|---------|
| 1     | 6.807     | 3831395 | 224030 | 47.940  | 53.664  |
| 2     | 7.819     | 4160694 | 193440 | 52.060  | 46.336  |
| Total |           | 7992089 | 417470 | 100.000 | 100.000 |

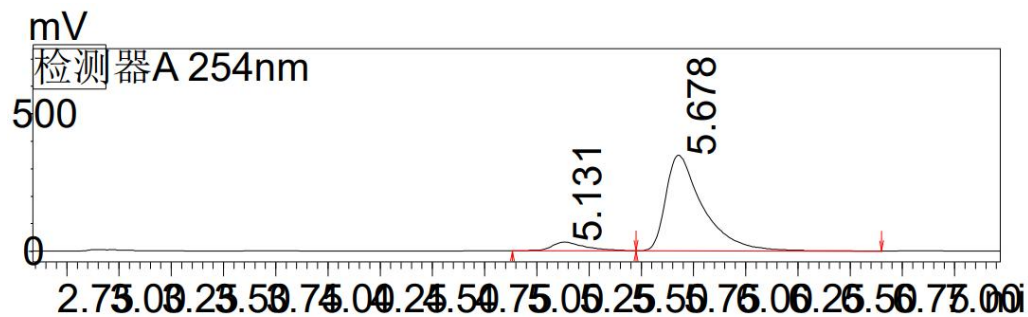

| Peak# | Ret. Time | Area    | Height | Area%   | Height% |
|-------|-----------|---------|--------|---------|---------|
| 1     | 5.131     | 361585  | 32090  | 7.720   | 8.421   |
| 2     | 5.678     | 4322030 | 348961 | 92.280  | 91.579  |
| Total |           | 4683615 | 381050 | 100.000 | 100.000 |

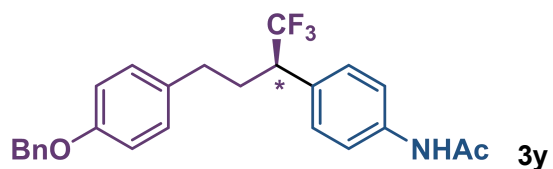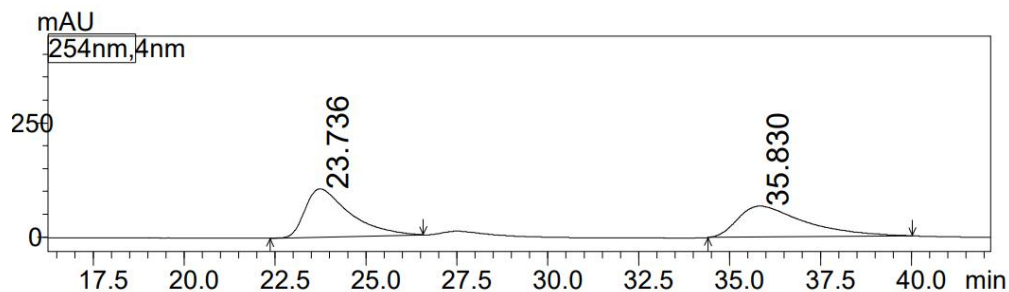

| Peak# | Ret. Time | Area     | Height | Area%   | Height% |
|-------|-----------|----------|--------|---------|---------|
| 1     | 23.736    | 8895507  | 105098 | 50.671  | 60.826  |
| 2     | 35.830    | 8659881  | 67688  | 49.329  | 39.174  |
| Total |           | 17555388 | 172787 | 100.000 | 100.000 |

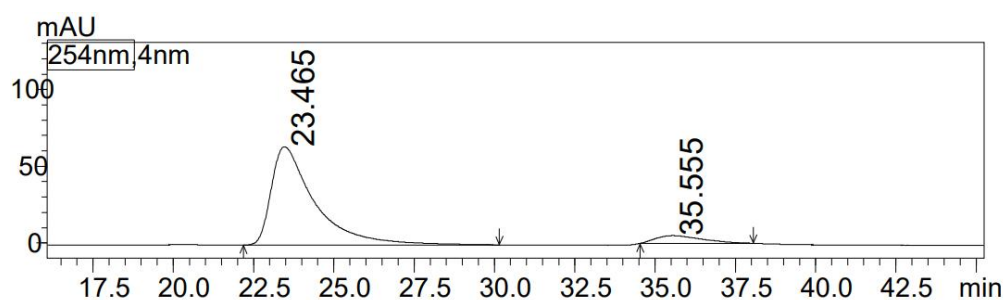

| Peak# | Ret. Time | Area    | Height | Area%   | Height% |
|-------|-----------|---------|--------|---------|---------|
| 1     | 23.465    | 5996817 | 63936  | 92.242  | 92.756  |
| 2     | 35.555    | 504371  | 4994   | 7.758   | 7.244   |
| Total |           | 6501188 | 68929  | 100.000 | 100.000 |

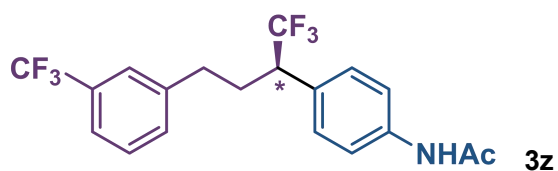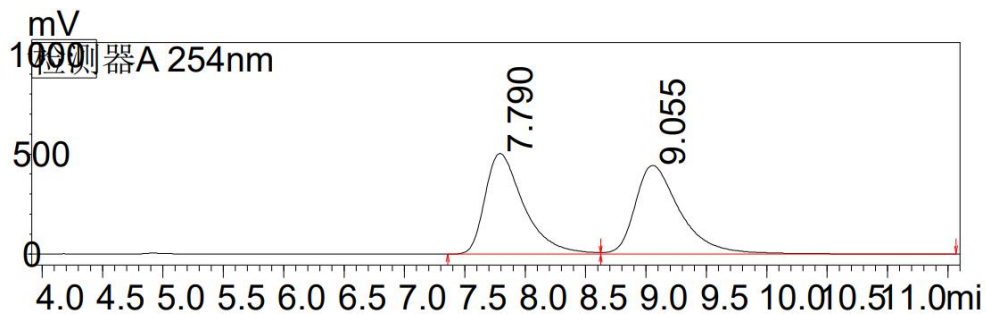

| Peak# | Ret. Time | Area     | Height | Area%   | Height% |
|-------|-----------|----------|--------|---------|---------|
| 1     | 7.790     | 11193724 | 501894 | 49.336  | 53.133  |
| 2     | 9.055     | 11494920 | 442710 | 50.664  | 46.867  |
| Total |           | 22688644 | 944604 | 100.000 | 100.000 |

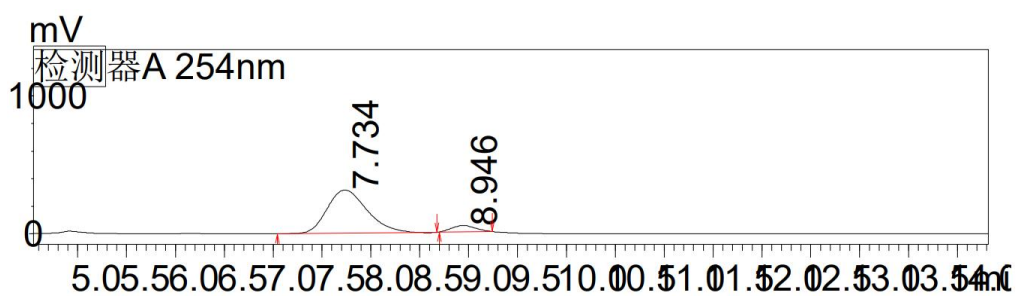

| Peak# | Ret. Time | Area    | Height | Area%   | Height% |
|-------|-----------|---------|--------|---------|---------|
| 1     | 7.734     | 8847468 | 313413 | 92.182  | 87.582  |
| 2     | 8.946     | 750341  | 44440  | 7.818   | 12.418  |
| Total |           | 9597810 | 357852 | 100.000 | 100.000 |



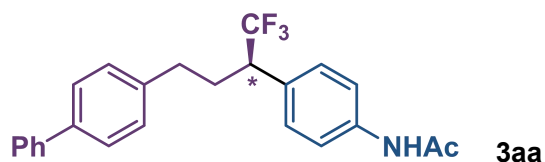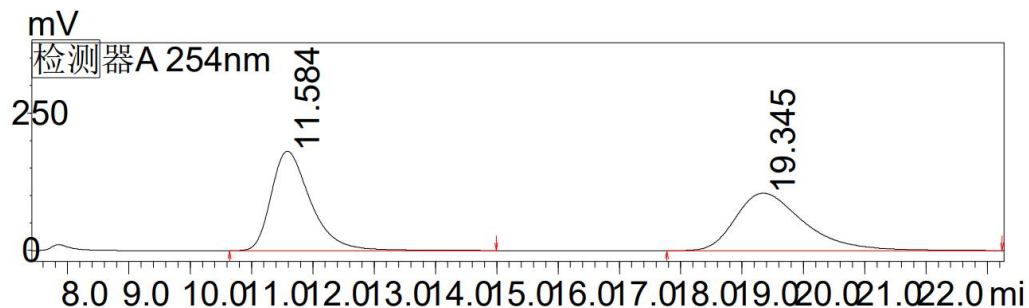

| Peak# | Ret. Time | Area     | Height | Area%   | Height% |
|-------|-----------|----------|--------|---------|---------|
| 1     | 11.584    | 8079120  | 180694 | 49.888  | 63.355  |
| 2     | 19.345    | 8115334  | 104514 | 50.112  | 36.645  |
| Total |           | 16194454 | 285208 | 100.000 | 100.000 |

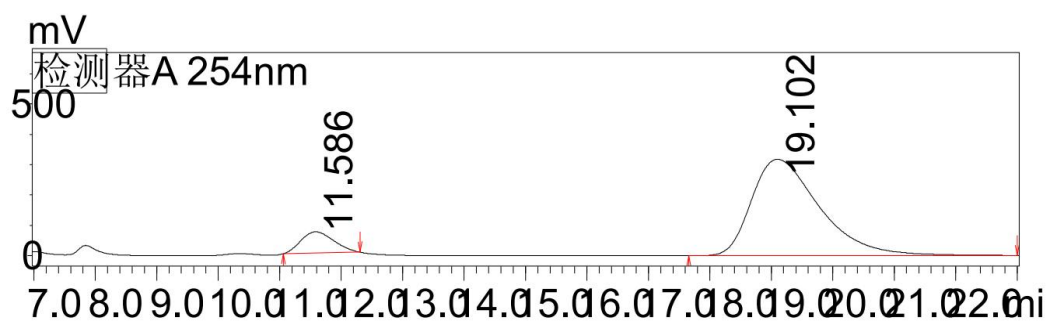

| Peak# | Ret. Time | Area     | Height | Area%   | Height% |
|-------|-----------|----------|--------|---------|---------|
| 1     | 11.586    | 2607974  | 69920  | 9.666   | 18.028  |
| 2     | 19.102    | 24372994 | 317913 | 90.334  | 81.972  |
| Total |           | 26980968 | 387833 | 100.000 | 100.000 |

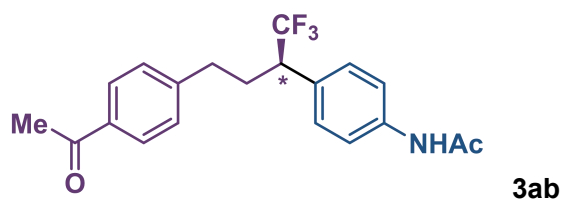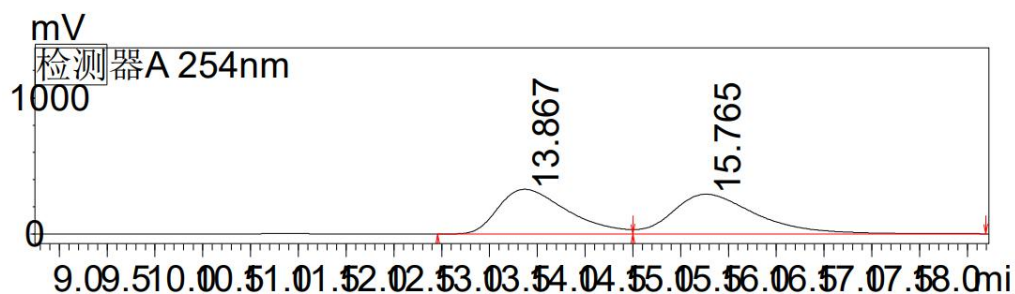

| Peak# | Ret. Time | Area     | Height | Area%   | Height% |
|-------|-----------|----------|--------|---------|---------|
| 1     | 13.867    | 16516511 | 327911 | 48.279  | 52.965  |
| 2     | 15.765    | 17693736 | 291193 | 51.721  | 47.035  |
| Total |           | 34210246 | 619104 | 100.000 | 100.000 |

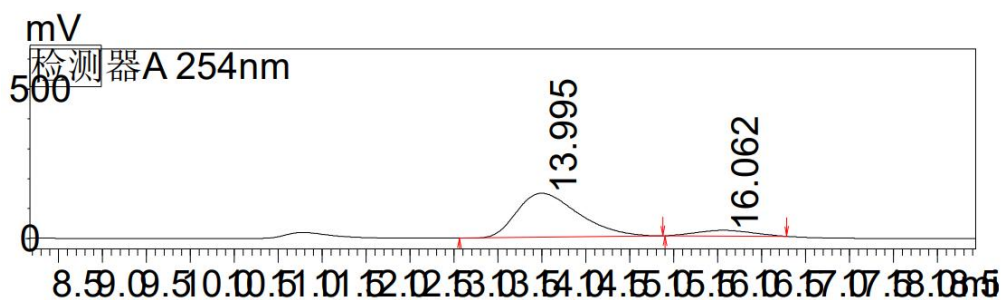

| Peak# | Ret. Time | Area    | Height | Area%   | Height% |
|-------|-----------|---------|--------|---------|---------|
| 1     | 13.995    | 7165702 | 147127 | 89.528  | 88.637  |
| 2     | 16.062    | 838165  | 18861  | 10.472  | 11.363  |
| Total |           | 8003867 | 165988 | 100.000 | 100.000 |

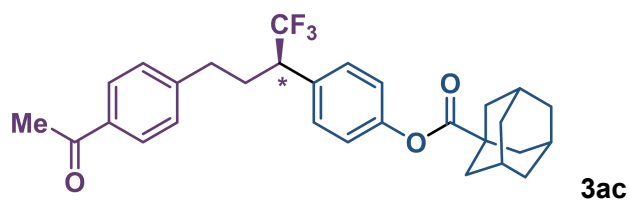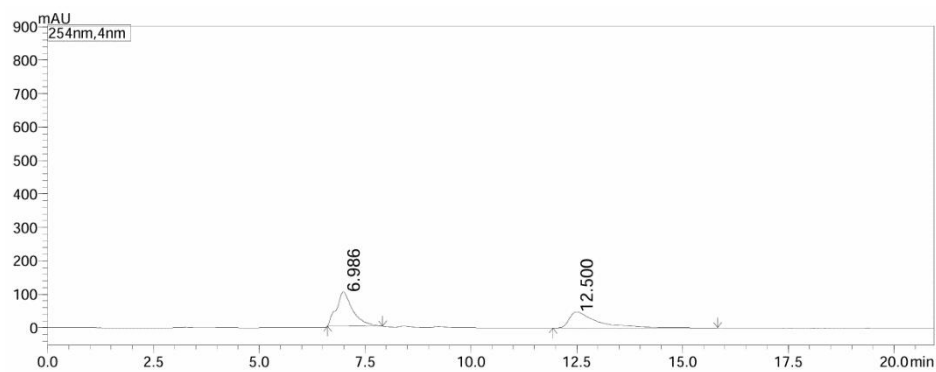

| Peak# | Ret. Time | Area    | Height | Area%   | Height% |
|-------|-----------|---------|--------|---------|---------|
| 1     | 6.986     | 2757844 | 102157 | 54.948  | 67.897  |
| 2     | 12.500    | 2261133 | 48302  | 45.052  | 32.103  |
| Total |           | 5018976 | 150458 | 100.000 | 100.000 |

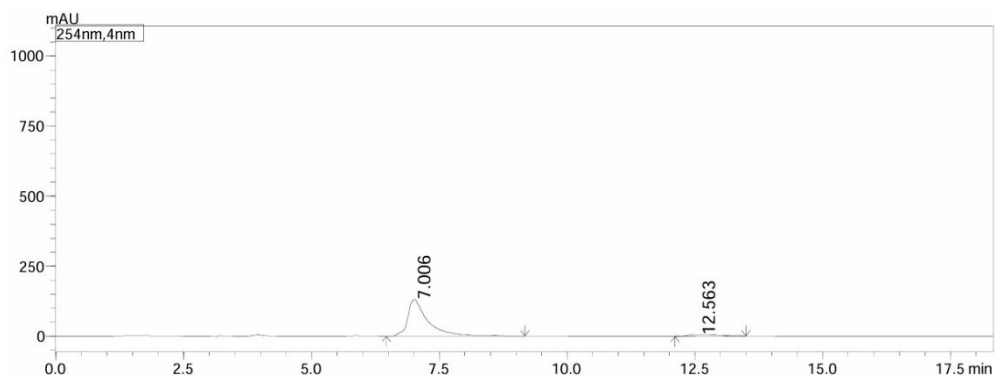

| Peak# | Ret. Time | Area    | Height | Area%   | Height% |
|-------|-----------|---------|--------|---------|---------|
| 1     | 7.006     | 3574563 | 130823 | 94.215  | 95.890  |
| 2     | 12.563    | 219491  | 5608   | 5.785   | 4.110   |
| Total |           | 3794054 | 136430 | 100.000 | 100.000 |

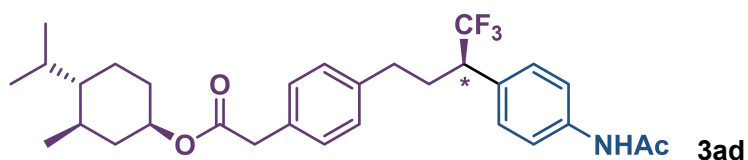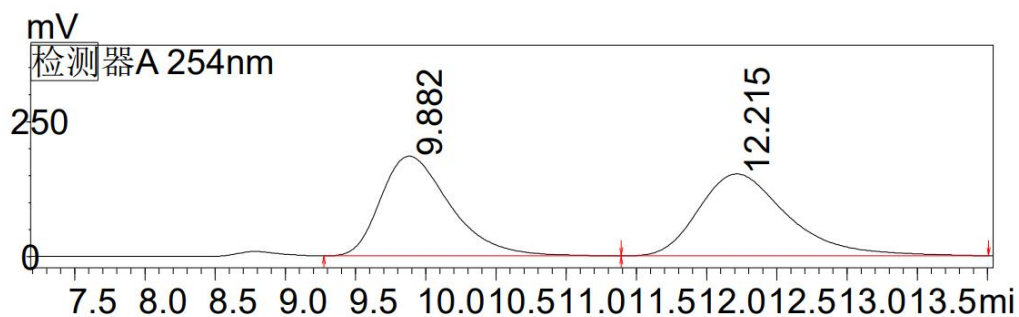

| Peak# | Ret. Time | Area     | Height | Area%   | Height% |
|-------|-----------|----------|--------|---------|---------|
| 1     | 9.882     | 6361227  | 184691 | 48.663  | 54.904  |
| 2     | 12.215    | 6710728  | 151699 | 51.337  | 45.096  |
| Total |           | 13071955 | 336390 | 100.000 | 100.000 |

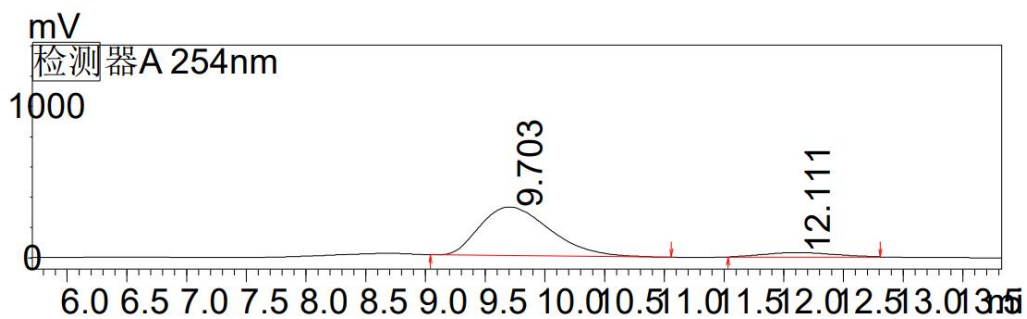

| Peak# | Ret. Time | Area     | Height | Area%   | Height% |
|-------|-----------|----------|--------|---------|---------|
| 1     | 9.703     | 13146713 | 320180 | 92.087  | 91.993  |
| 2     | 12.111    | 1129735  | 27870  | 7.913   | 8.007   |
| Total |           | 14276448 | 348050 | 100.000 | 100.000 |

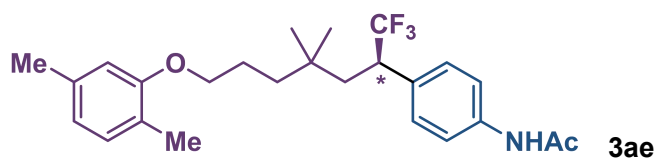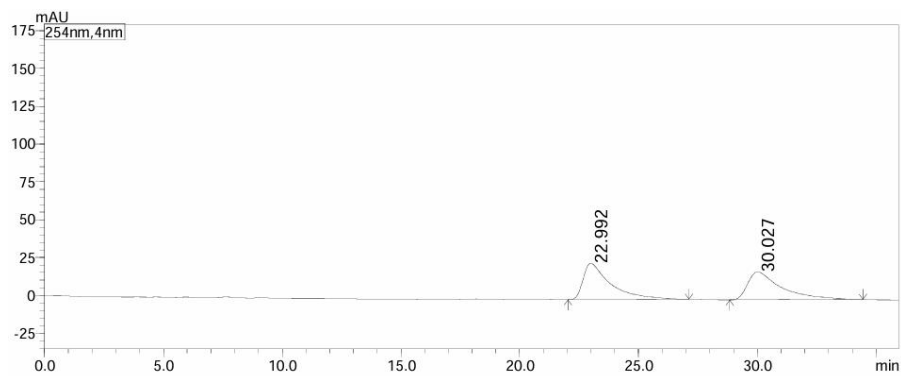

| Peak# | Ret. Time | Area    | Height | Area%   | Height% |
|-------|-----------|---------|--------|---------|---------|
| 1     | 22.992    | 1914039 | 23922  | 51.215  | 56.522  |
| 2     | 30.027    | 1823217 | 18402  | 48.785  | 43.478  |
| Total |           | 3737255 | 42324  | 100.000 | 100.000 |

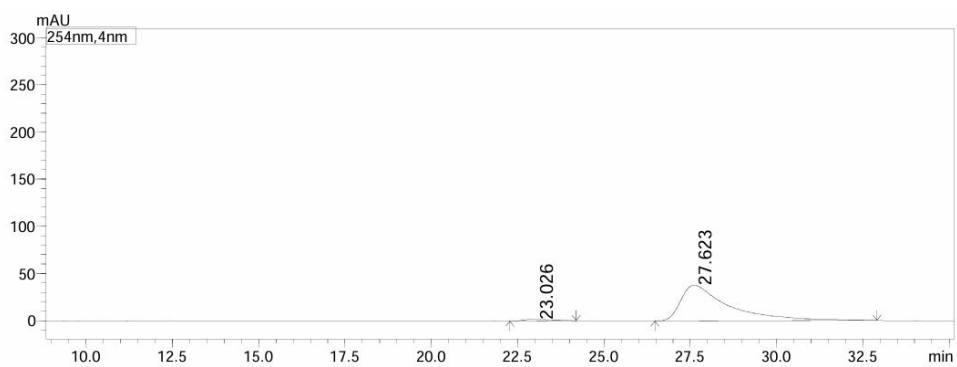

| Peak# | Ret. Time | Area    | Height | Area%   | Height% |
|-------|-----------|---------|--------|---------|---------|
| 1     | 23.026    | 88638   | 1538   | 2.379   | 3.901   |
| 2     | 27.623    | 3637027 | 37895  | 97.621  | 96.099  |
| Total |           | 3725665 | 39433  | 100.000 | 100.000 |

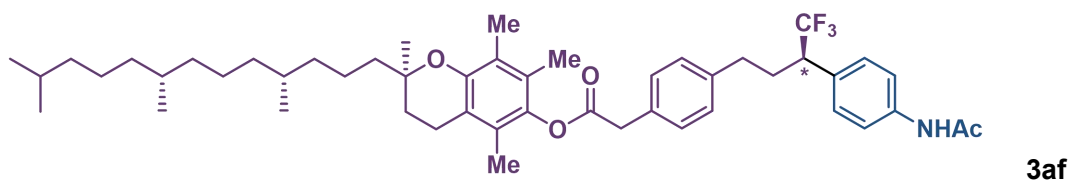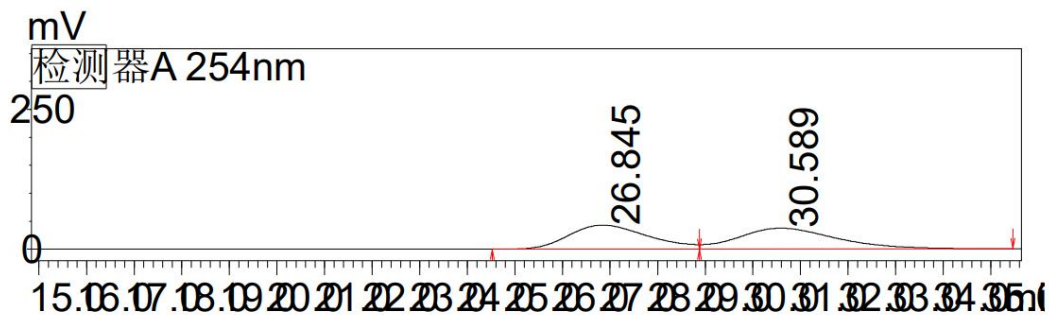

| Peak# | Ret. Time | Area     | Height | Area%   | Height% |
|-------|-----------|----------|--------|---------|---------|
| 1     | 26.845    | 4974030  | 42902  | 48.325  | 53.511  |
| 2     | 30.589    | 5318748  | 37272  | 51.675  | 46.489  |
| Total |           | 10292779 | 80174  | 100.000 | 100.000 |

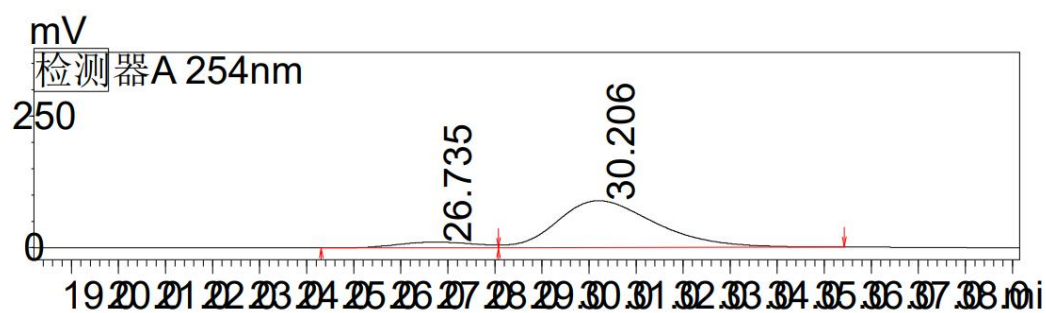

| Peak# | Ret. Time | Area     | Height | Area%   | Height% |
|-------|-----------|----------|--------|---------|---------|
| 1     | 26.735    | 1265677  | 11064  | 8.896   | 11.069  |
| 2     | 30.206    | 12961181 | 88891  | 91.104  | 88.931  |
| Total |           | 14226858 | 99955  | 100.000 | 100.000 |

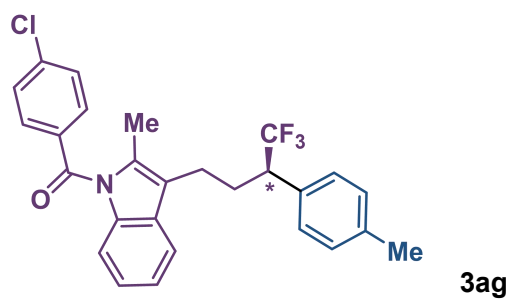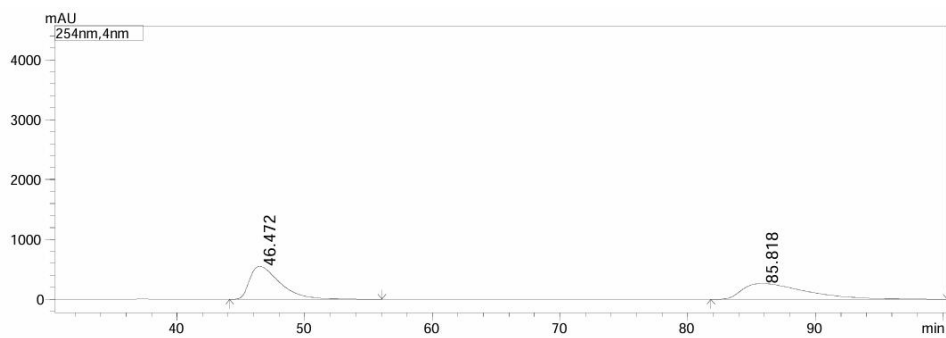

| Peak# | Ret. Time | Area      | Height | Area%   | Height% |
|-------|-----------|-----------|--------|---------|---------|
| 1     | 46.472    | 90406122  | 550768 | 50.052  | 67.535  |
| 2     | 85.818    | 90218358  | 264760 | 49.948  | 32.465  |
| Total |           | 180624480 | 815528 | 100.000 | 100.000 |

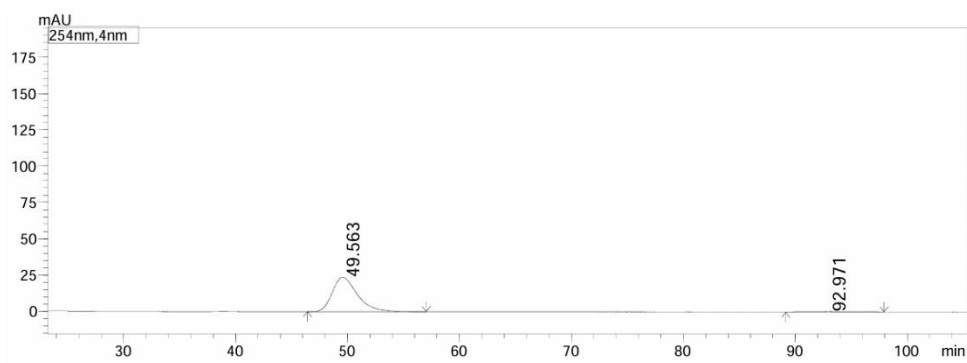

| Peak# | Ret. Time | Area    | Height | Area%   | Height% |
|-------|-----------|---------|--------|---------|---------|
| 1     | 49.563    | 3678622 | 23600  | 97.078  | 98.234  |
| 2     | 92.971    | 110730  | 424    | 2.922   | 1.766   |
| Total |           | 3789352 | 24024  | 100.000 | 100.000 |

## NMR Spectra

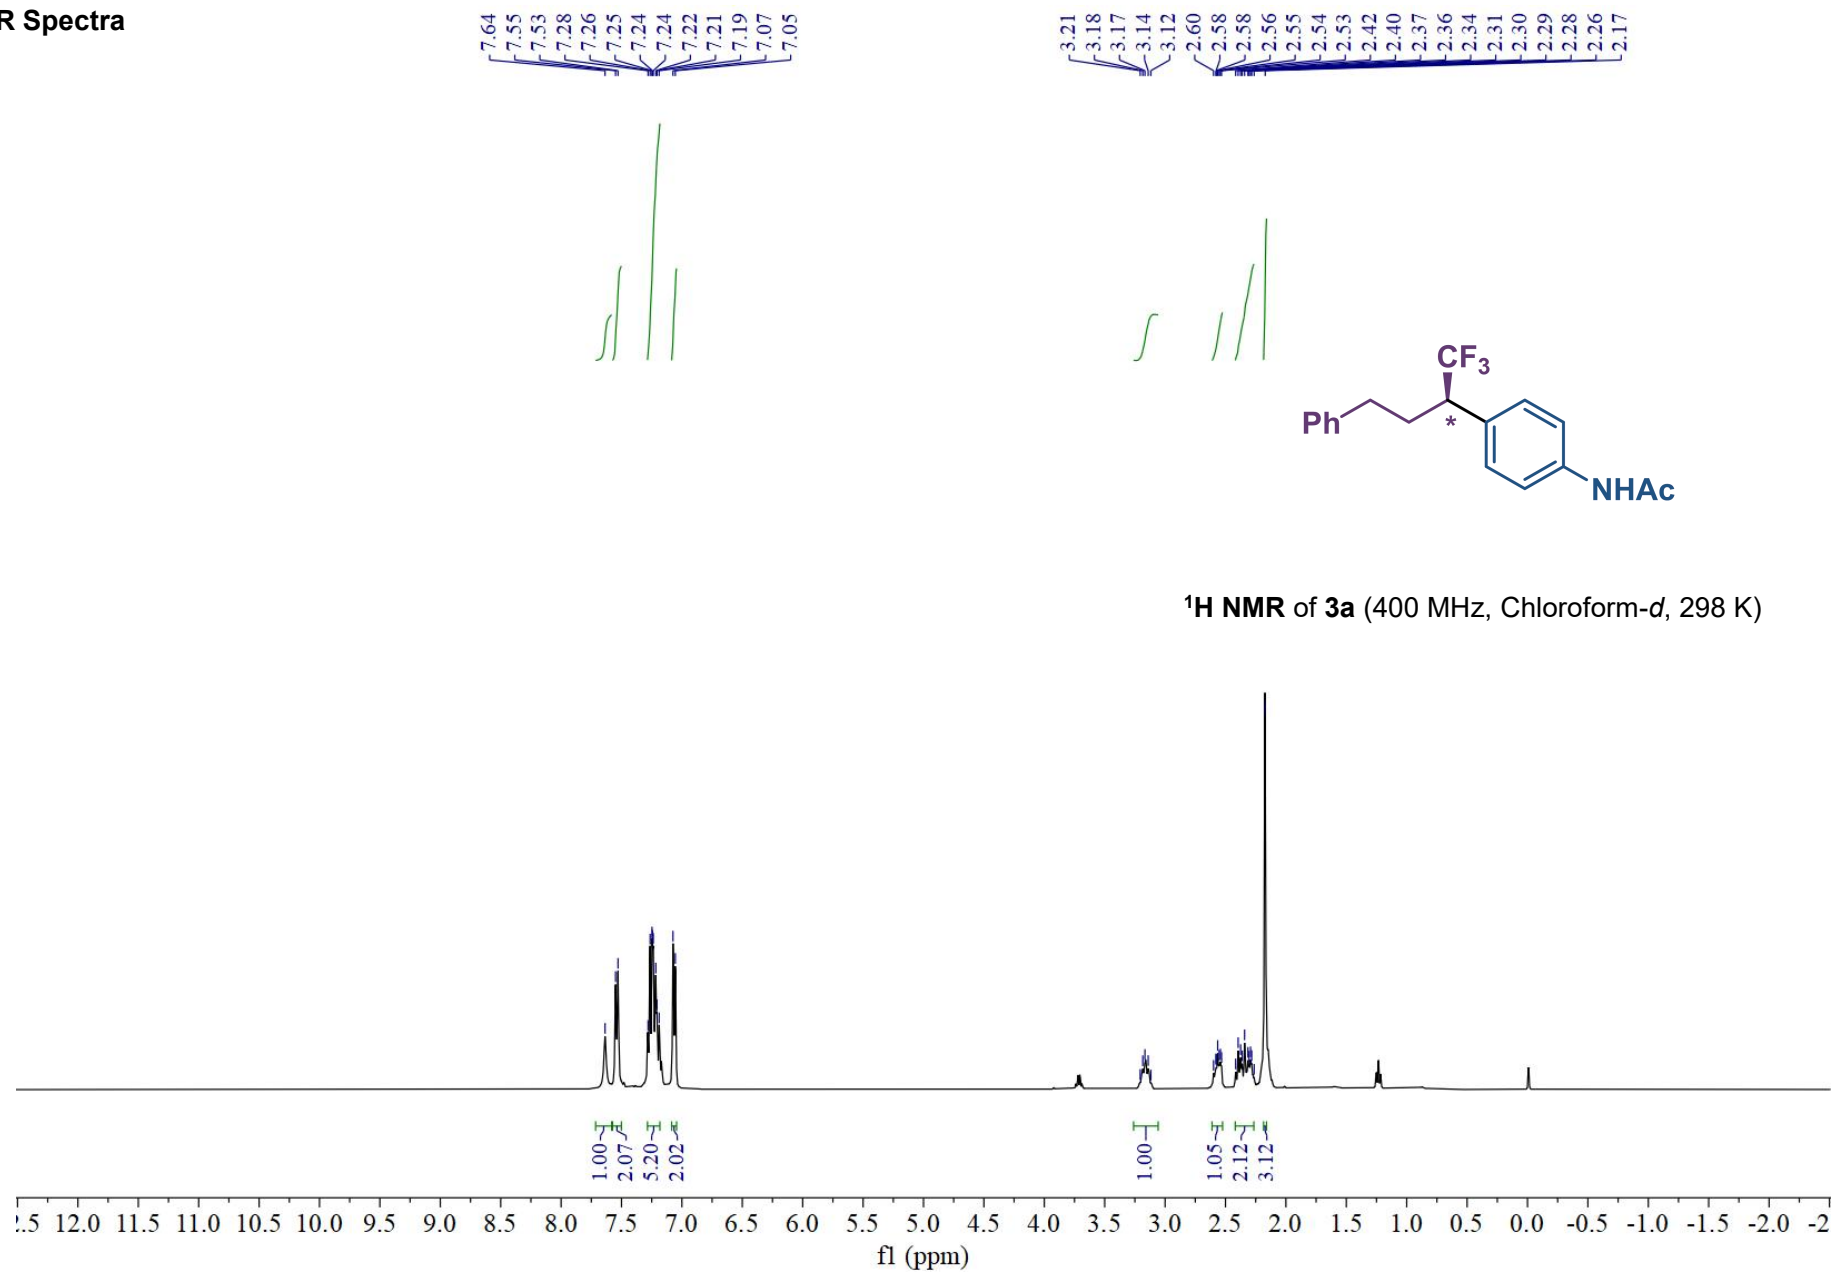



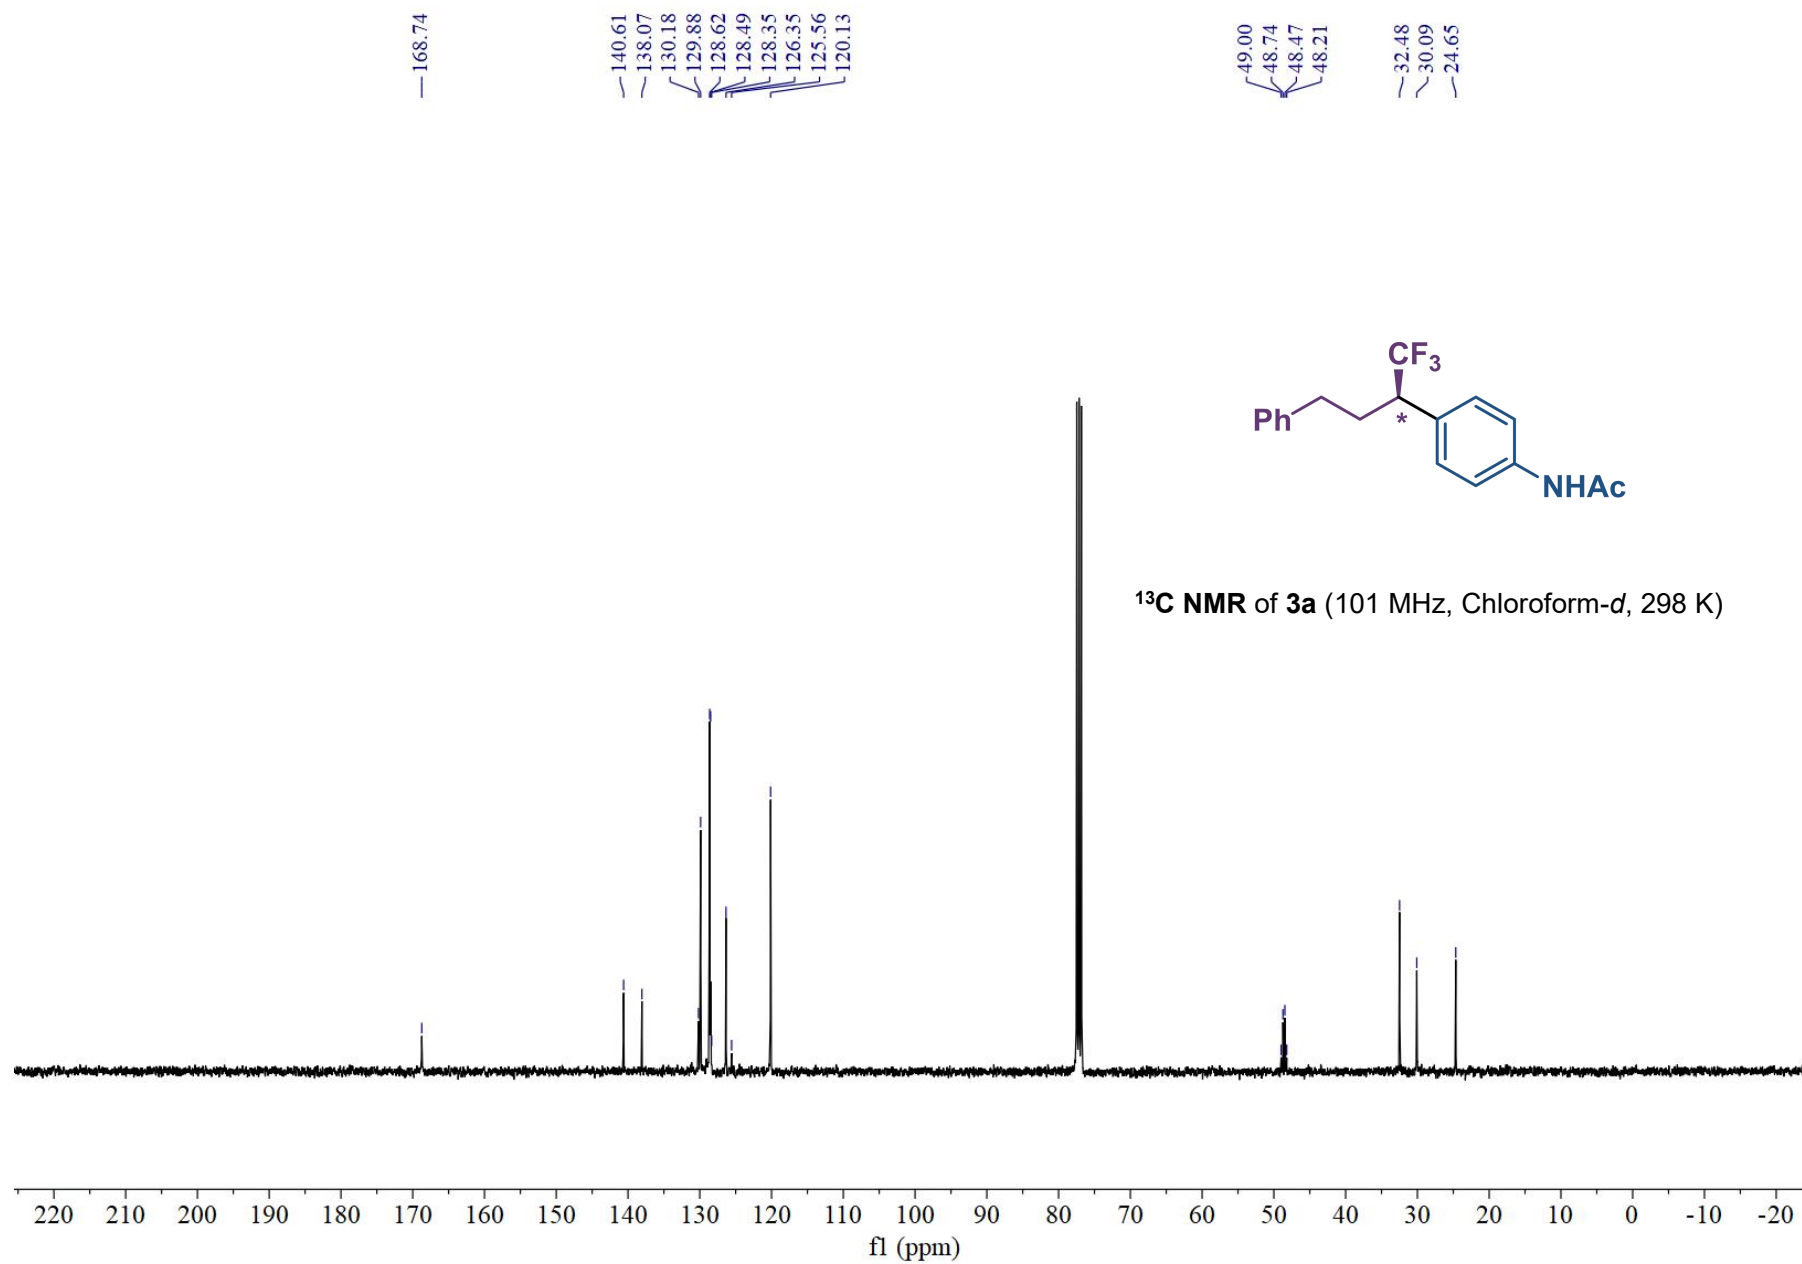

-69.74  
-69.77

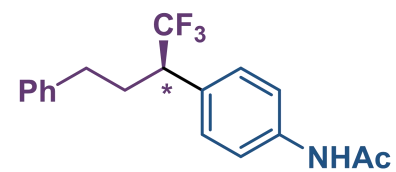

**<sup>19</sup>F NMR of 3a** (376 MHz, Chloroform-*d*, 298 K)

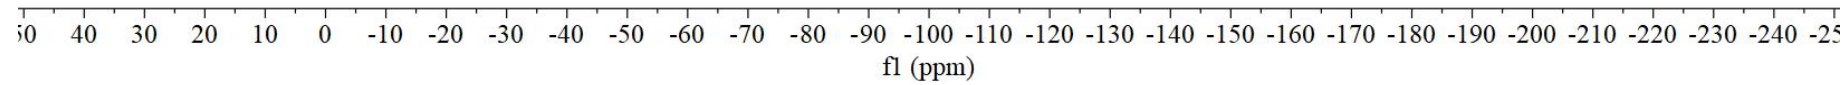

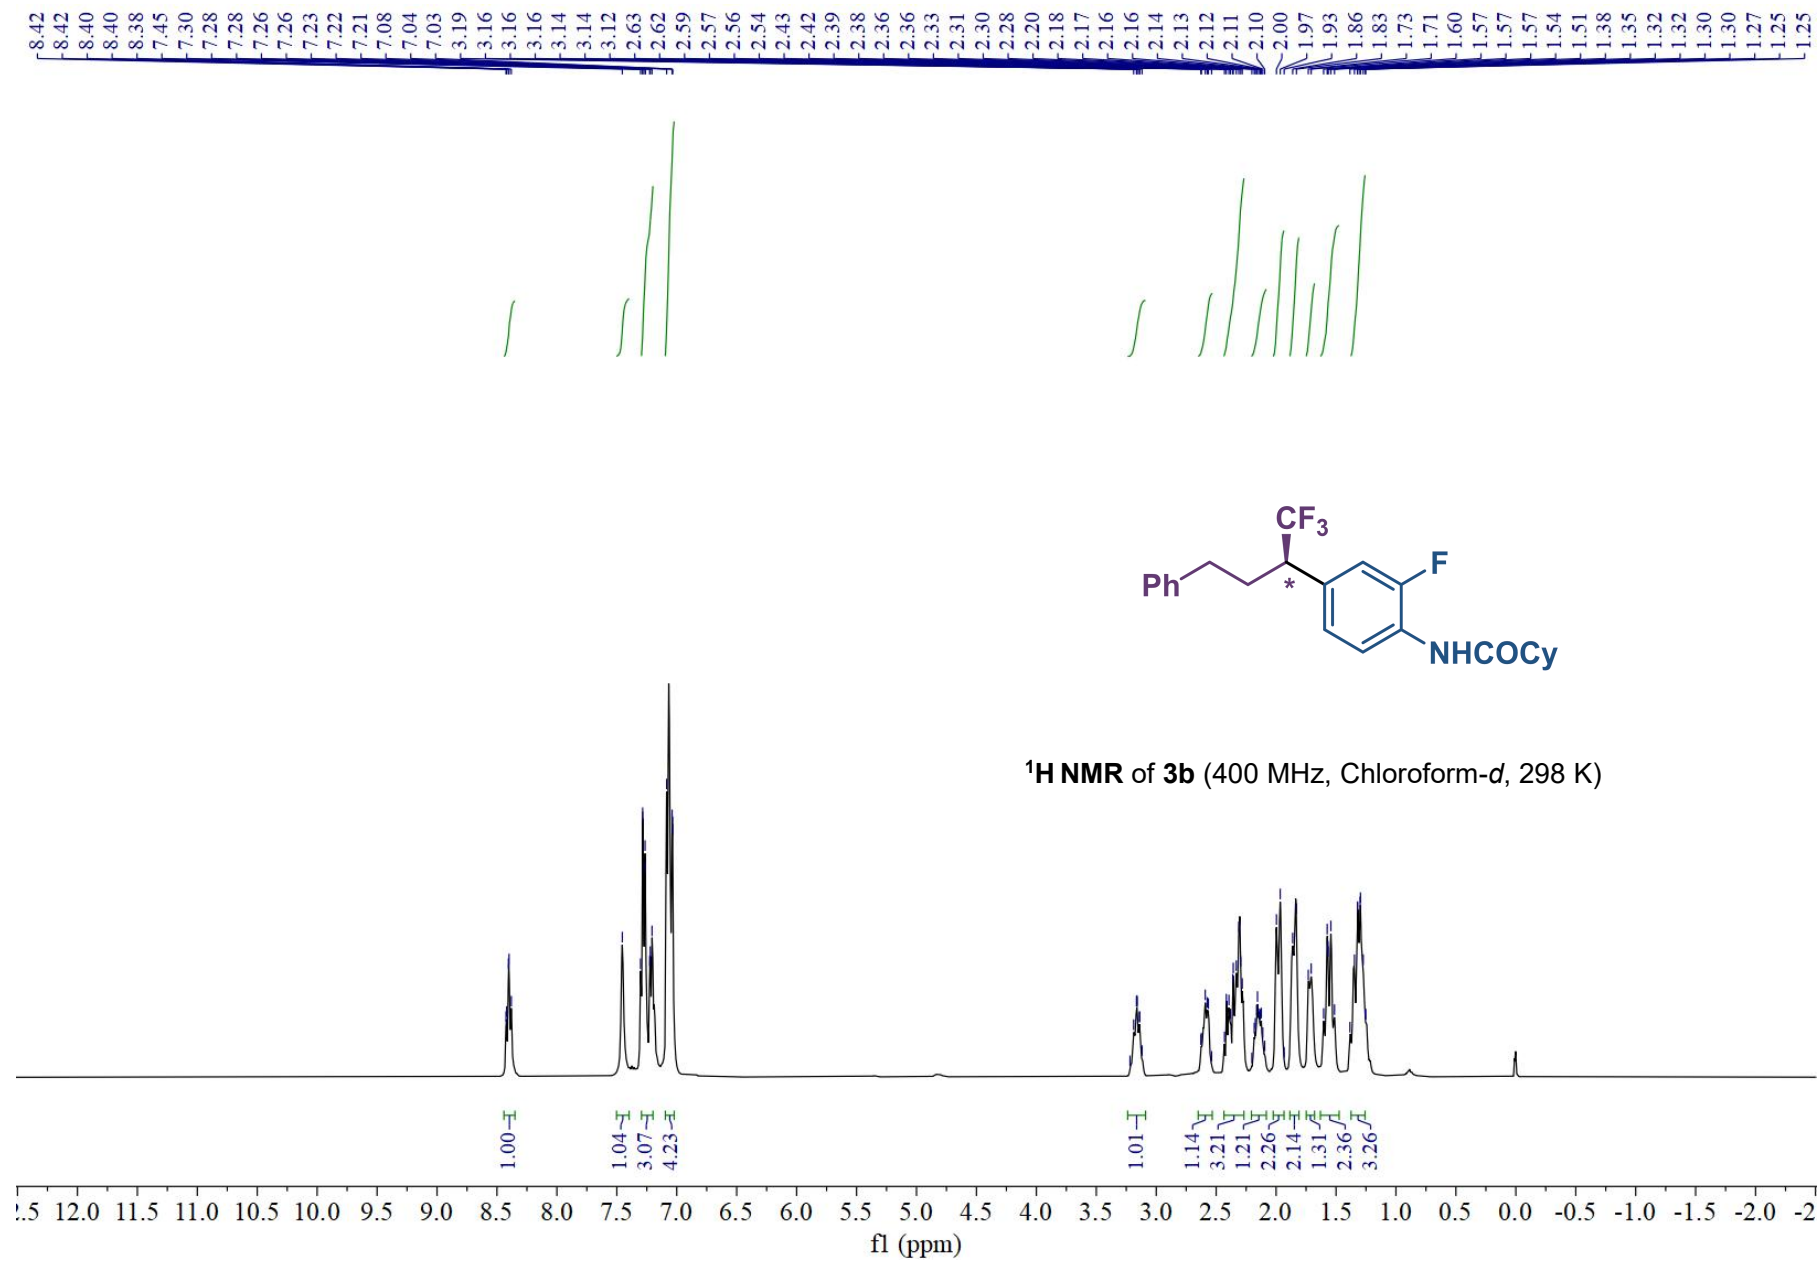

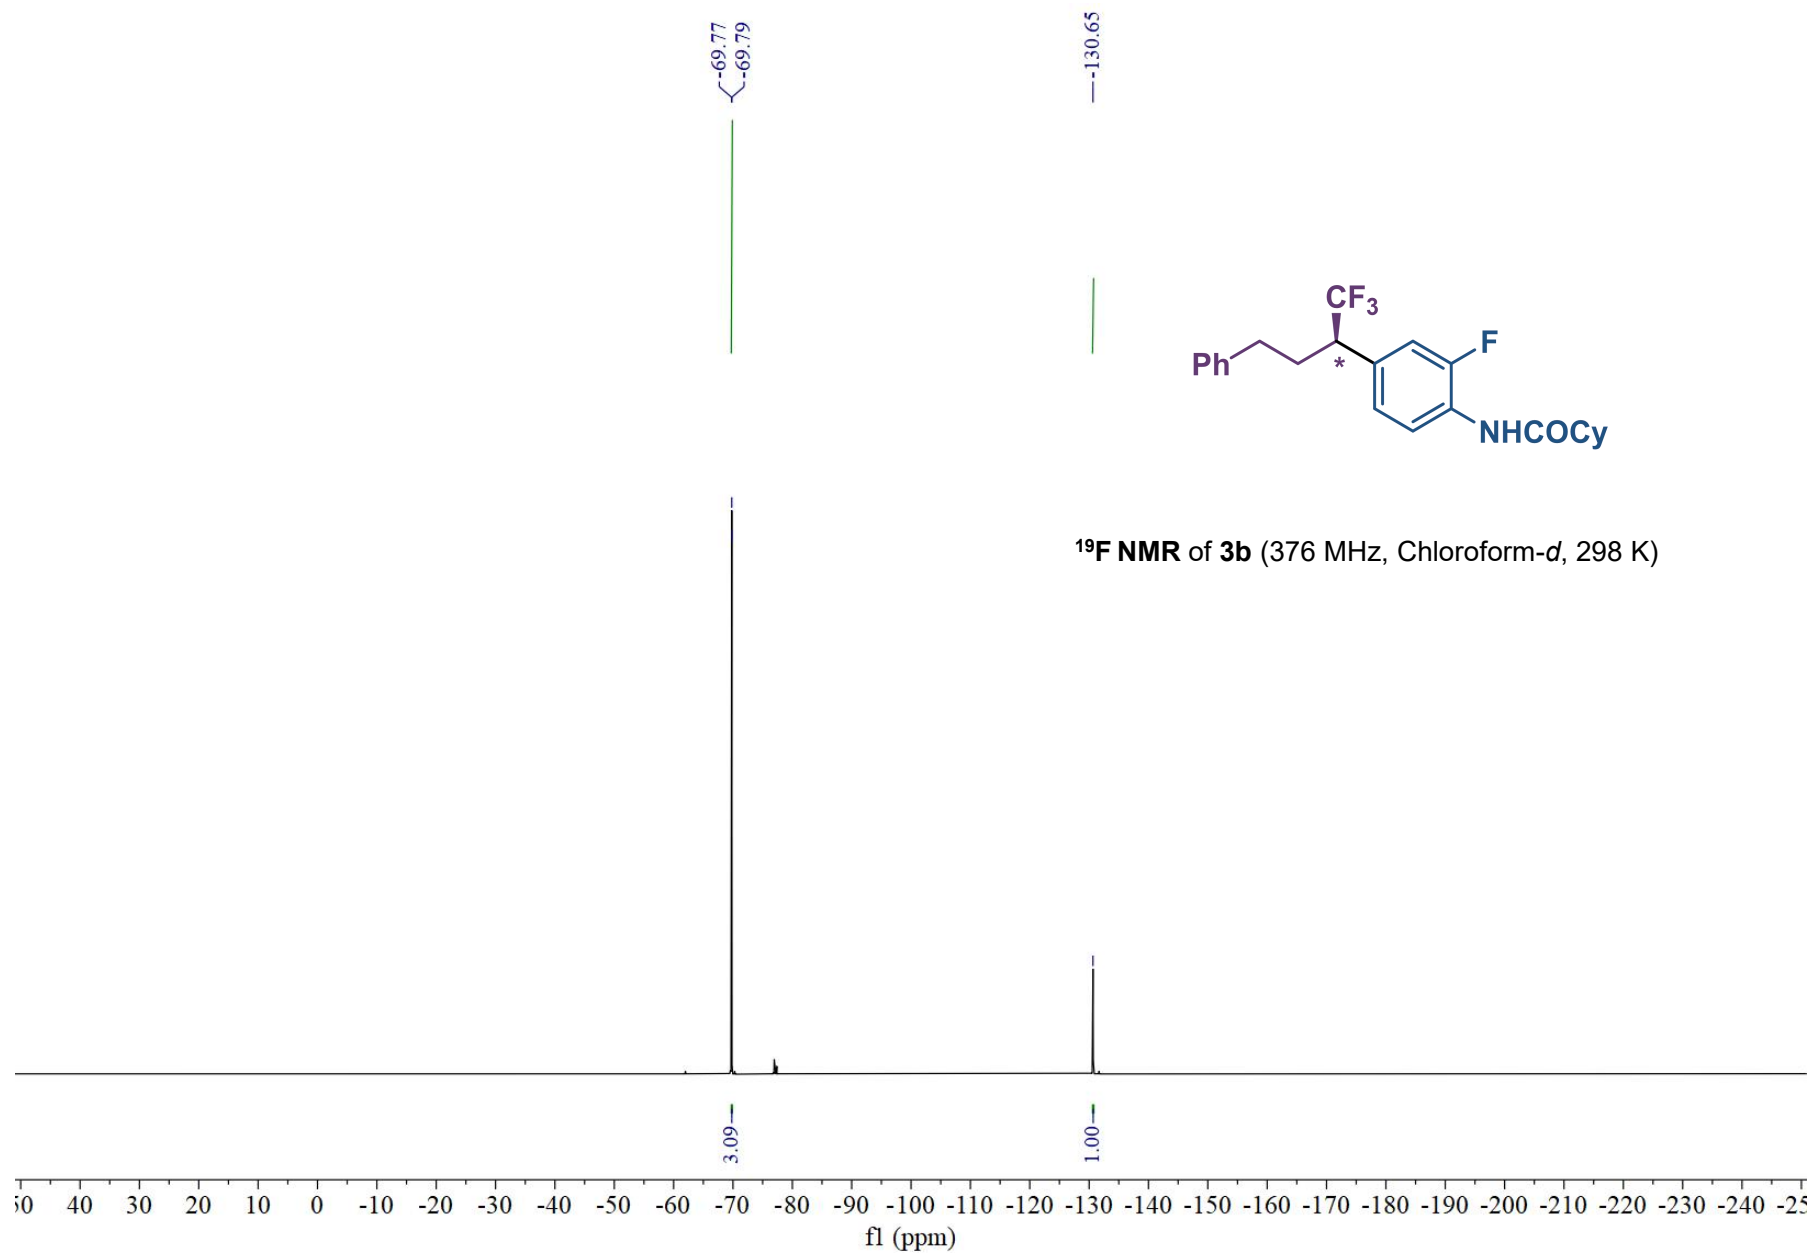

— 174.59  
— 153.55  
— 151.14  
— 140.34  
— 130.51  
— 130.45  
— 128.68  
— 128.48  
— 128.10  
— 126.77  
— 126.67  
— 126.45  
— 125.86  
— 125.32  
— 121.75  
— 115.31  
— 115.10

48.91  
48.65  
48.38  
48.12  
46.63  
32.40  
30.05  
29.71  
25.68

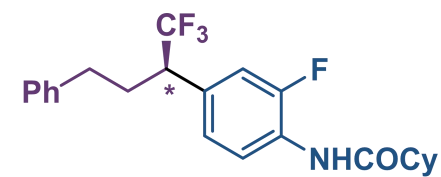

<sup>13</sup>C NMR of **3b** (101 MHz, Chloroform-*d*, 298 K)

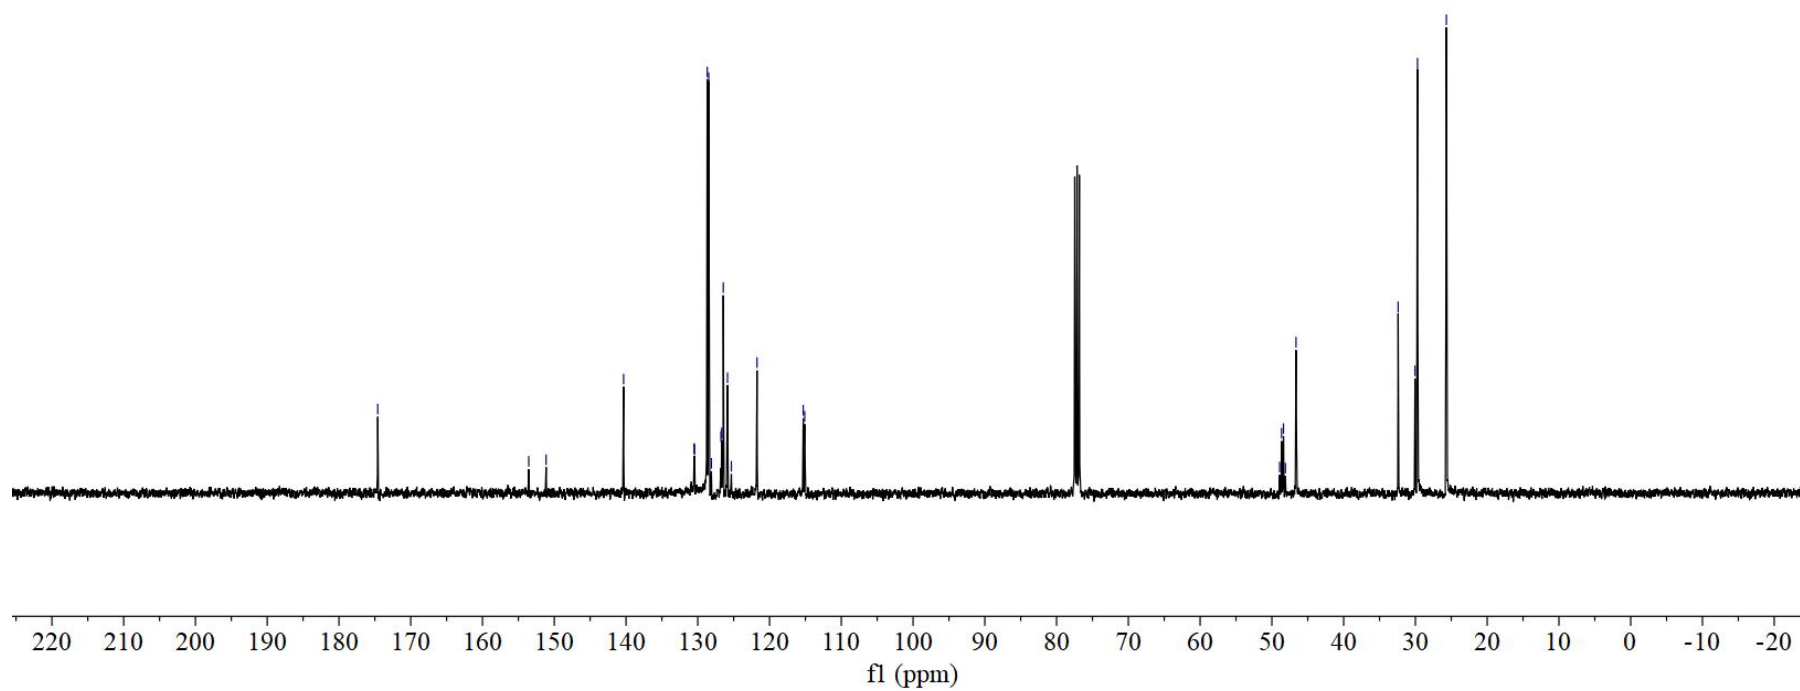

7.29  
7.28  
7.27  
7.25  
7.20  
7.18  
7.17  
7.10  
7.09  
7.07

3.23  
3.21  
3.20  
3.19  
3.17  
3.16  
3.15  
3.14  
3.12  
3.11

2.61  
2.59  
2.57  
2.56  
2.55  
2.54  
2.41  
2.39  
2.38  
2.34  
2.33  
2.31  
2.31  
2.30  
2.29  
2.28  
2.23  
2.22  
2.21  
2.20  
2.19  
2.18  
2.17  
2.16

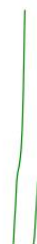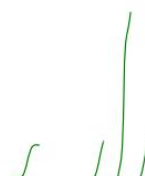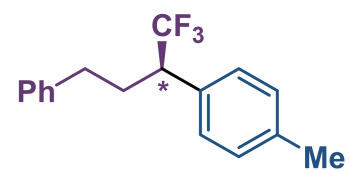

<sup>1</sup>H NMR of 3c (400 MHz, Chloroform-*d*, 298 K)

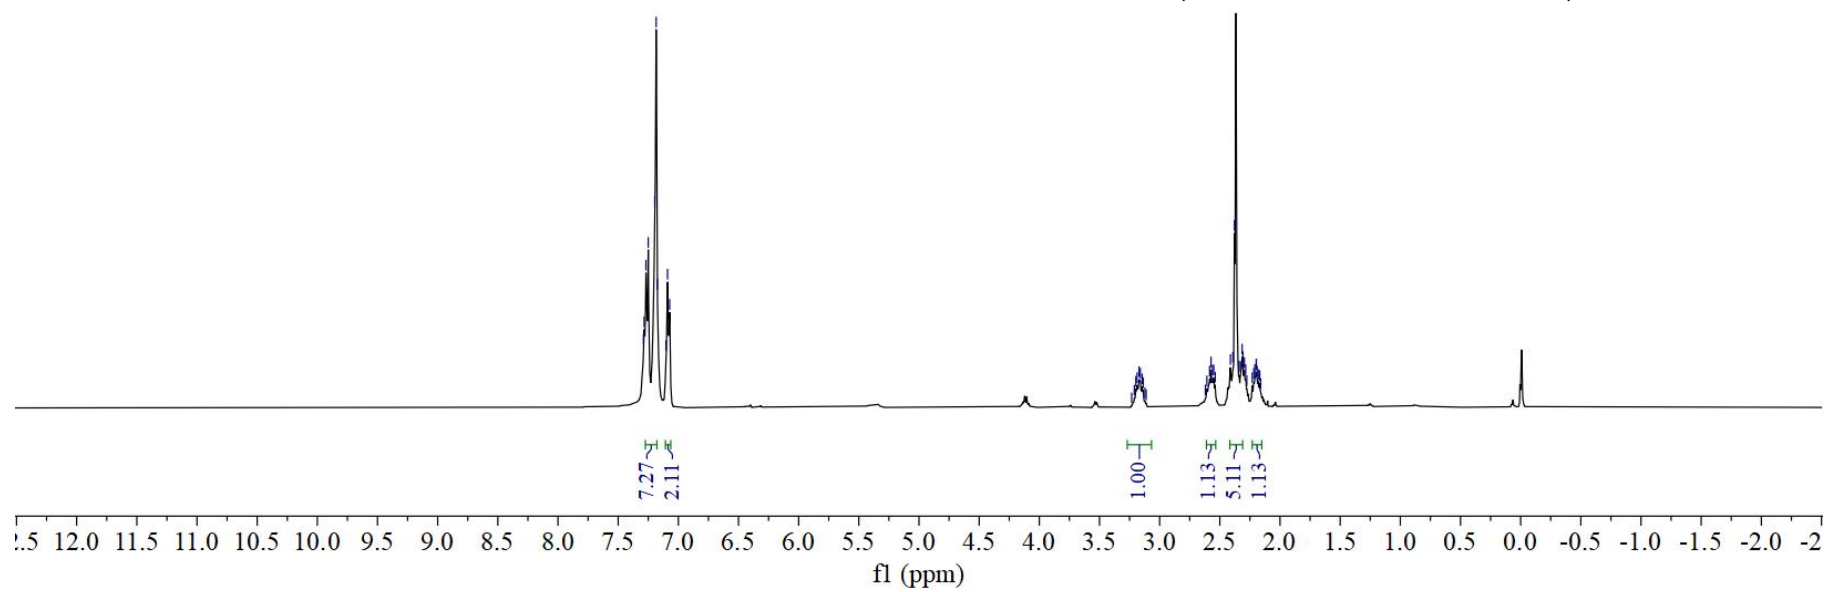

-69.74  
-69.77

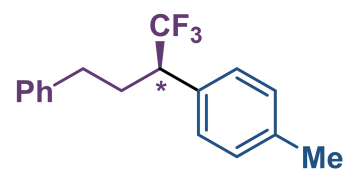

**<sup>19</sup>F NMR of 3c** (376 MHz, Chloroform-*d*, 298 K)

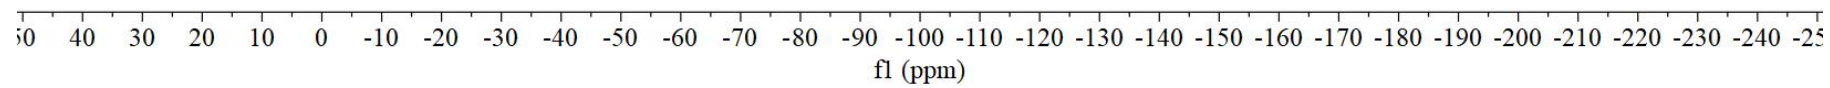

140.82  
138.11  
131.42  
130.93  
129.57  
129.16  
128.60  
128.53  
128.10  
126.28  
125.27  
122.45

49.21  
48.95  
48.69  
48.42  
32.59  
30.18  
21.25

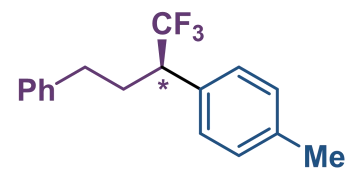

$^{13}\text{C}$  NMR of **3c** (101 MHz, Chloroform-*d*, 298 K)

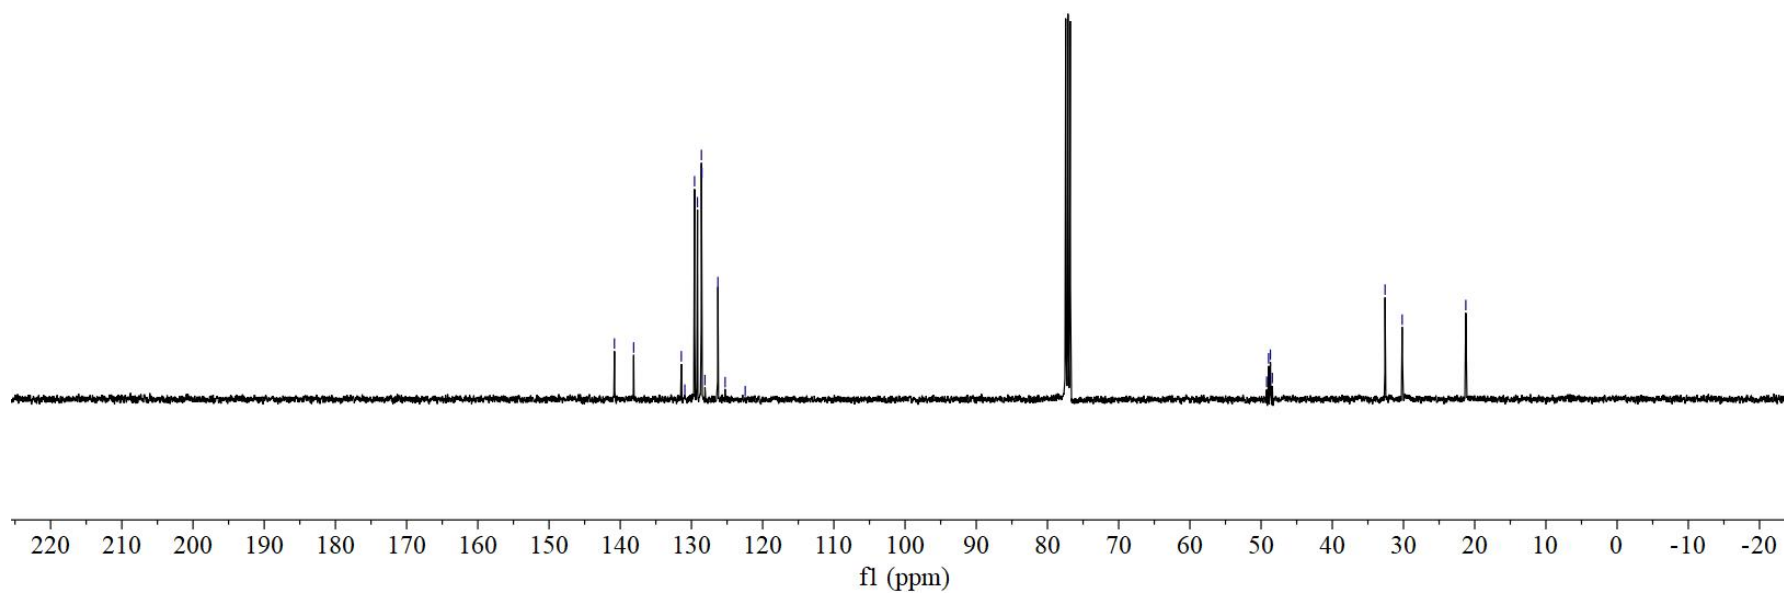





-69.54  
-69.57

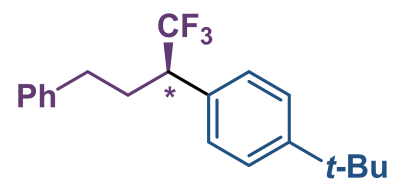

<sup>19</sup>F NMR of **3d** (376 MHz, Chloroform-*d*, 298 K)

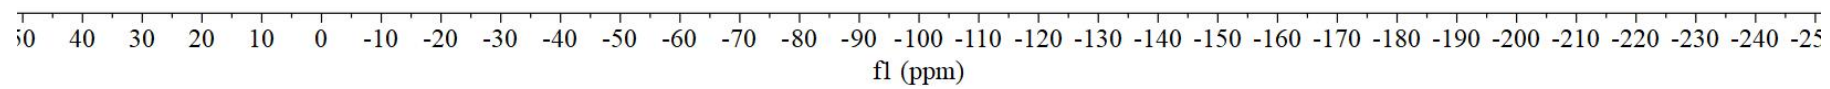

151.20  
150.02  
140.89  
138.31  
131.67  
128.88  
128.59  
126.79  
126.11  
125.75  
123.25

49.21  
48.92  
48.67  
48.41  
34.65  
32.70  
31.51  
30.29

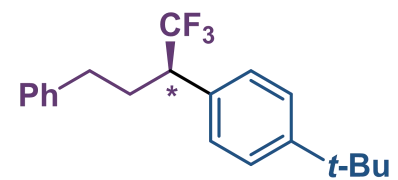

<sup>13</sup>C NMR of 3d (101 MHz, Chloroform-*d*, 298 K)

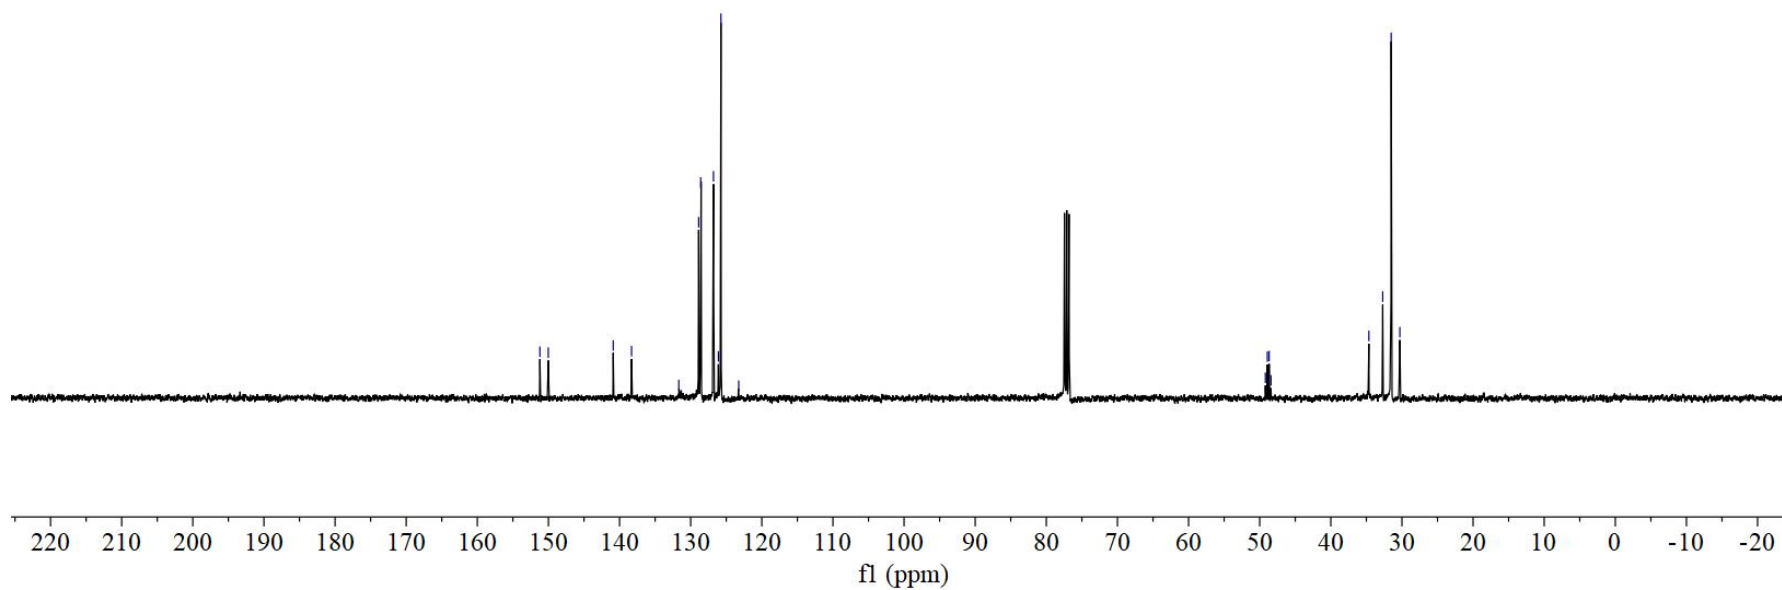

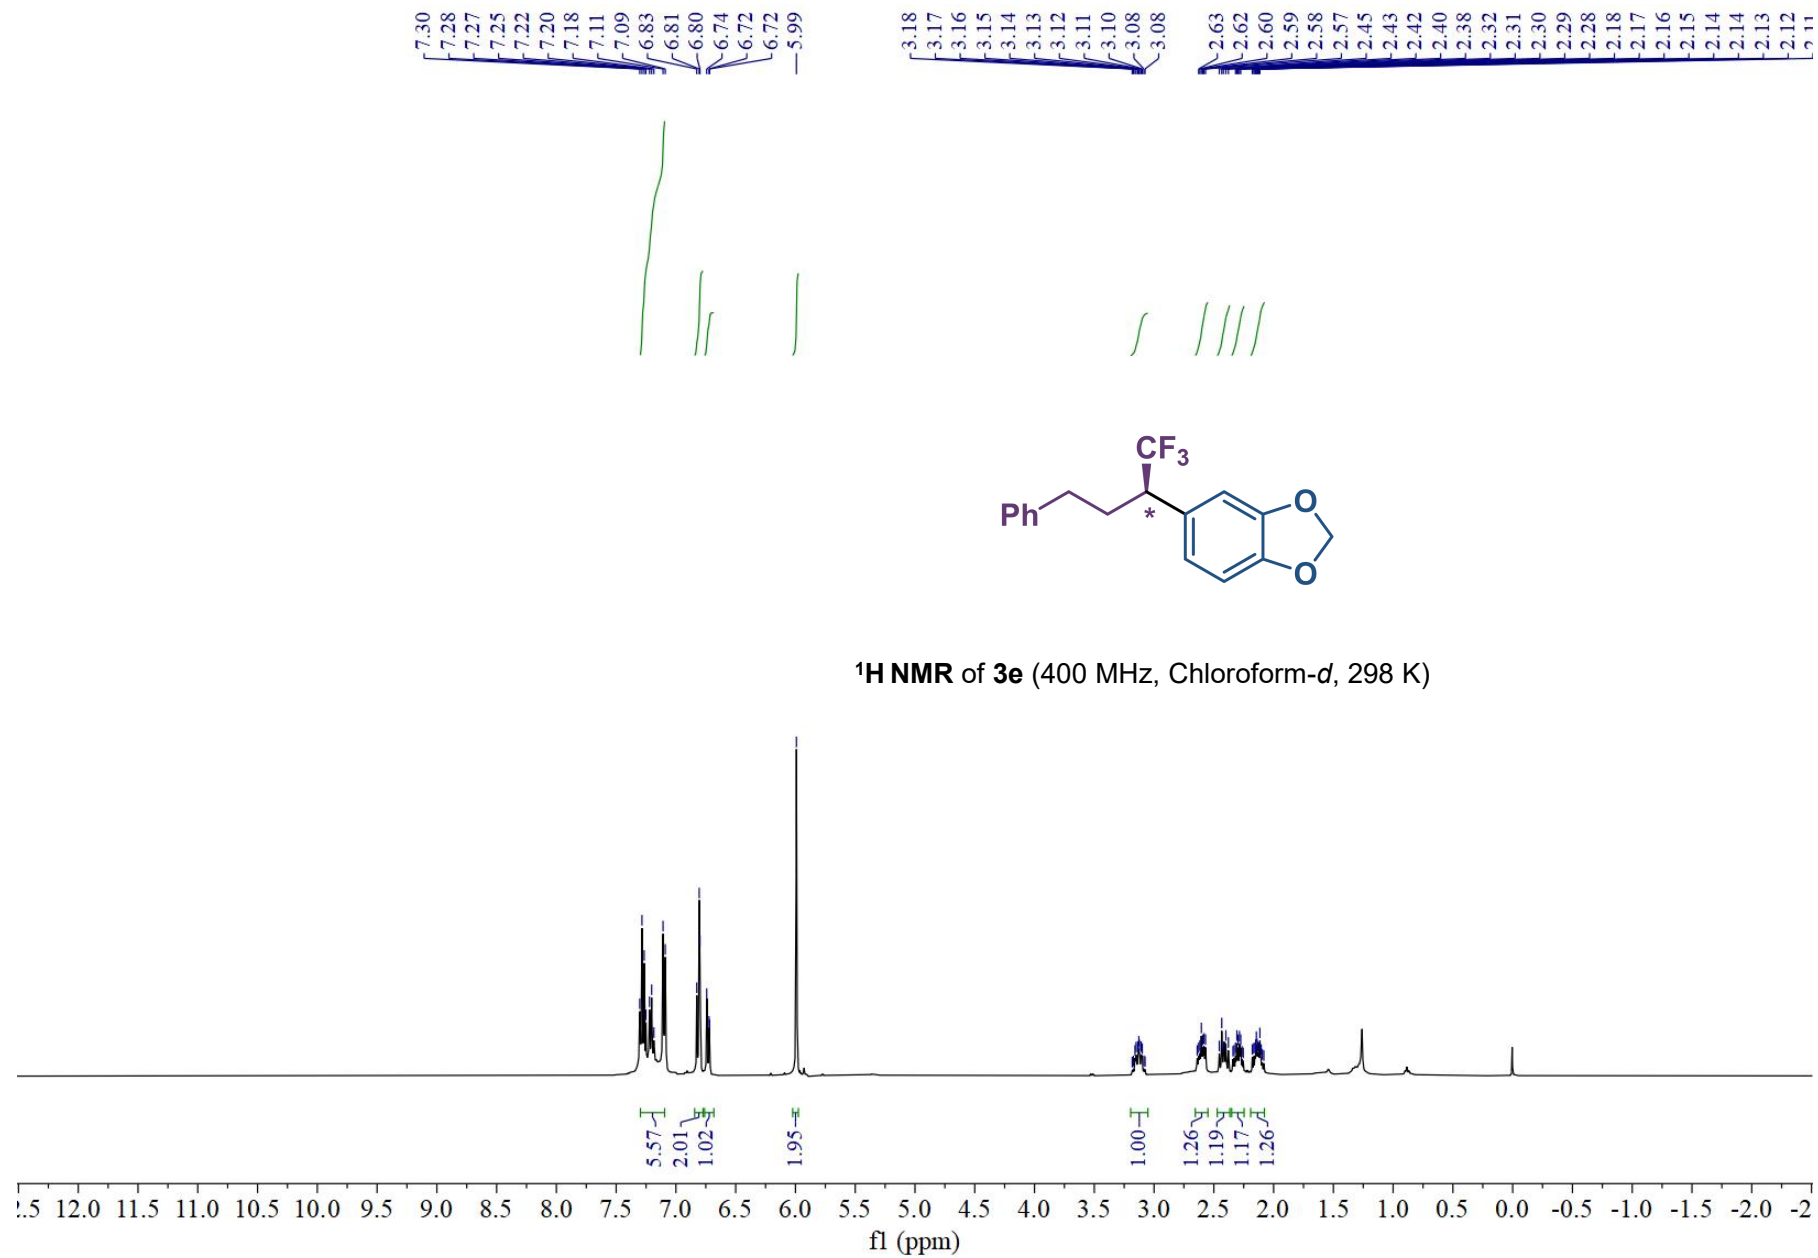

-69.91  
-69.94

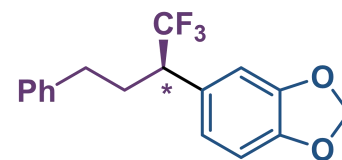

**<sup>19</sup>F NMR of 3e** (376 MHz, Chloroform-*d*, 298 K)

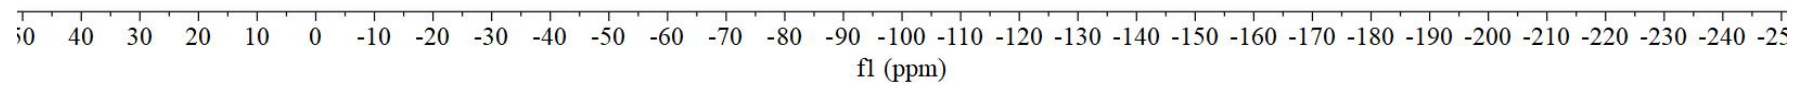

148.17  
147.65  
— 140.67  
128.62  
128.51  
128.35  
126.35  
125.56  
123.18  
108.98  
108.50  
— 101.36  
49.01  
48.74  
32.51  
30.26

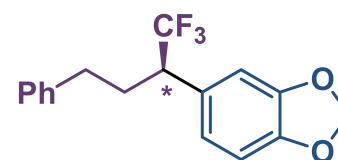

<sup>13</sup>C NMR of 3e (101 MHz, Chloroform-d, 298 K)

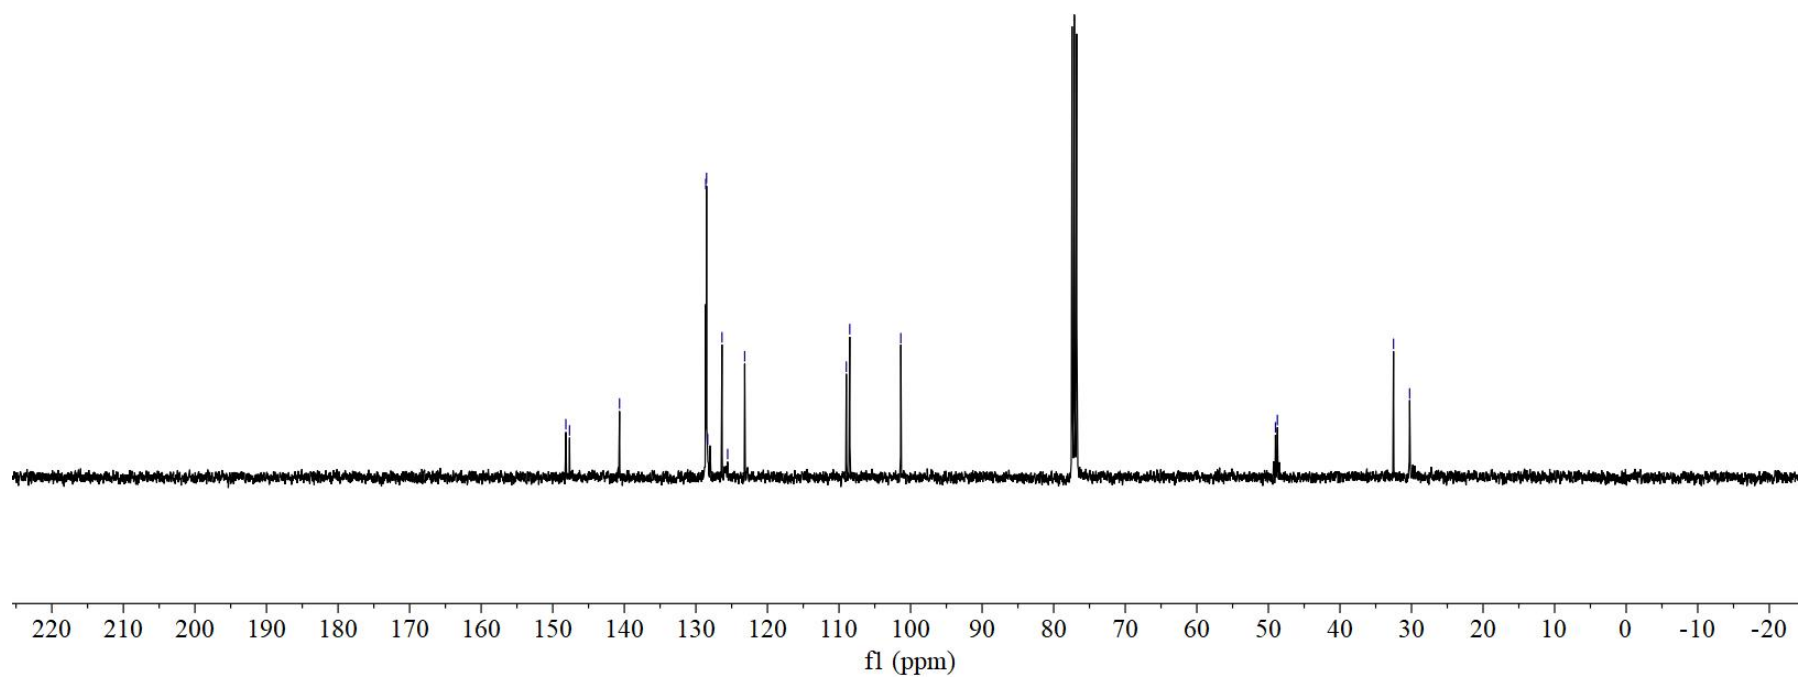

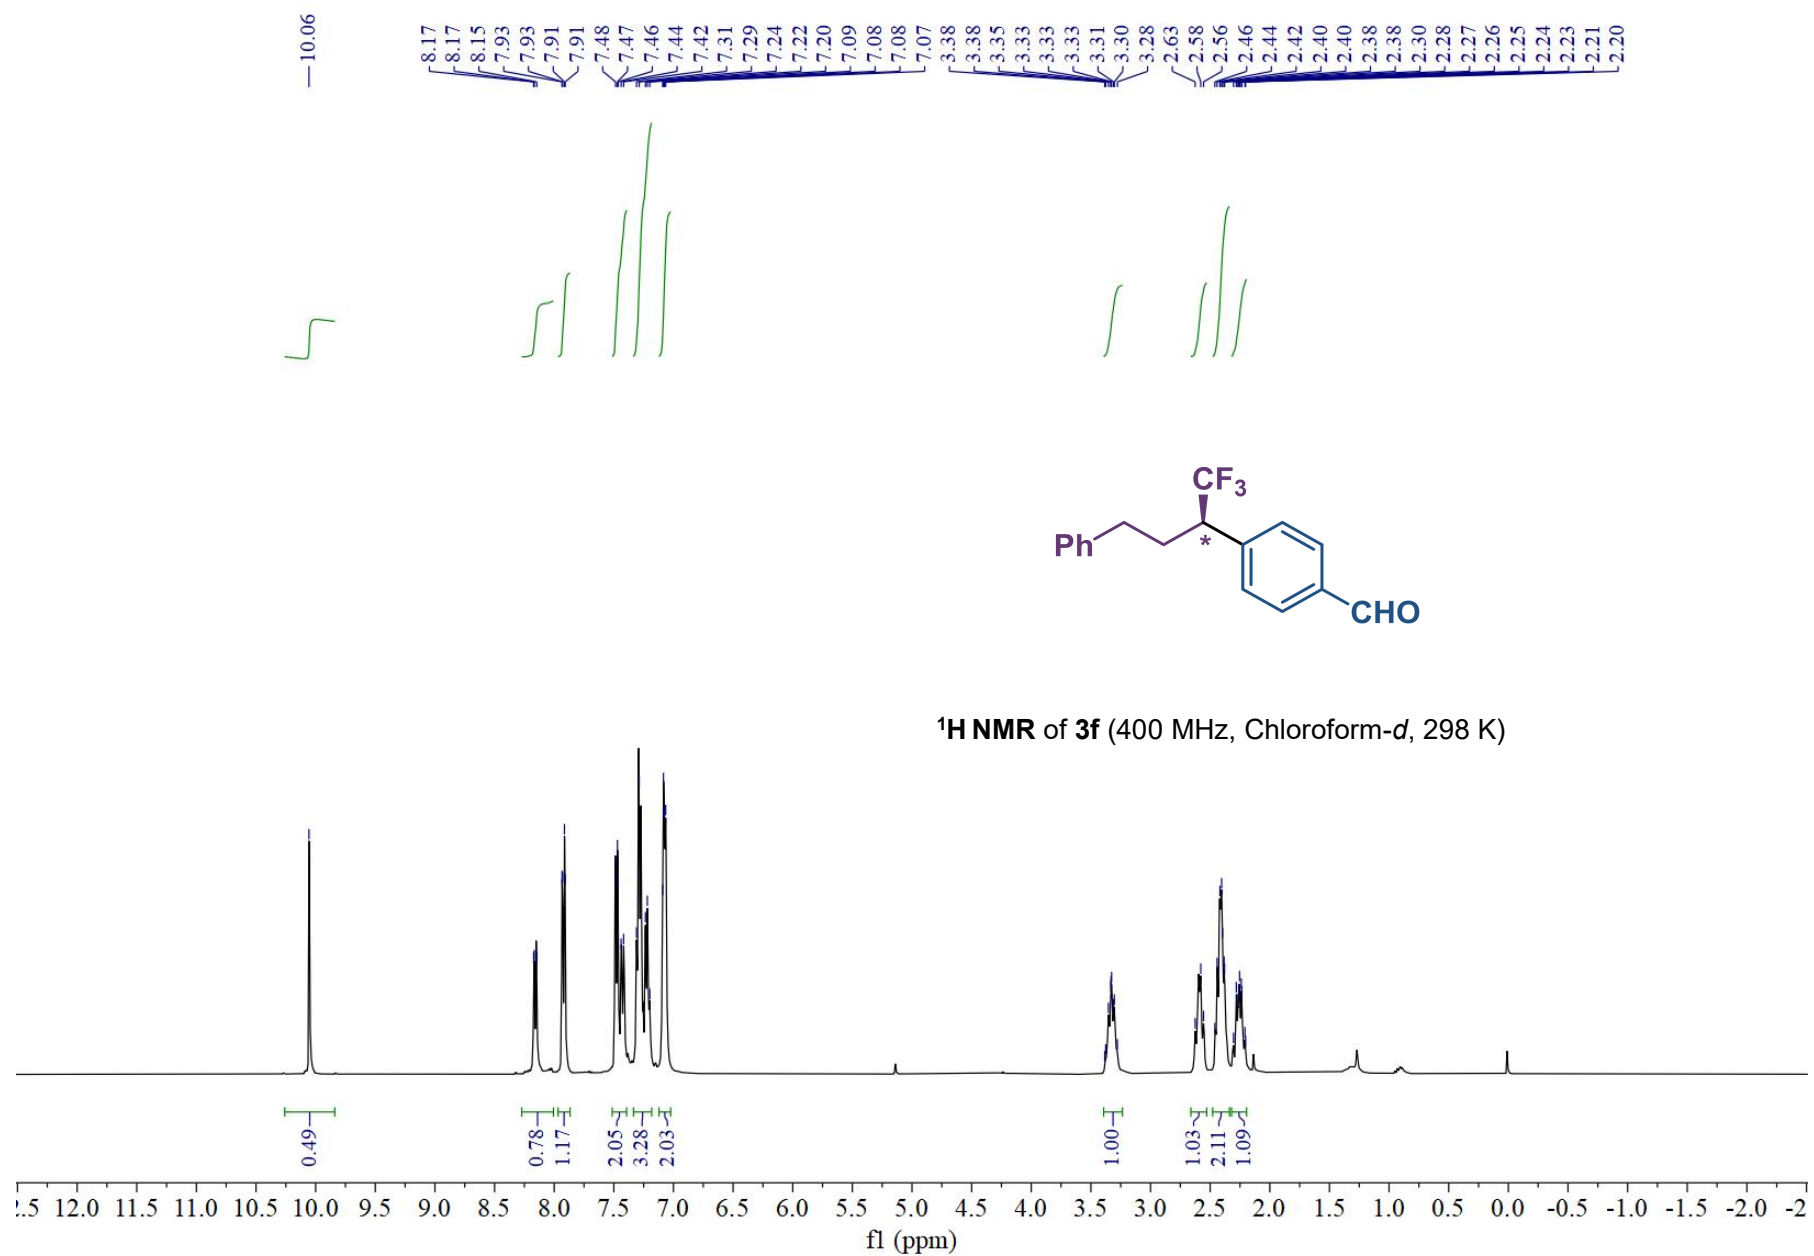

-69.11  
-69.14

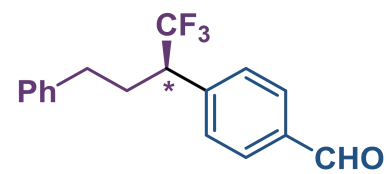

**<sup>19</sup>F NMR of 3f** (376 MHz, Chloroform-*d*, 298 K)

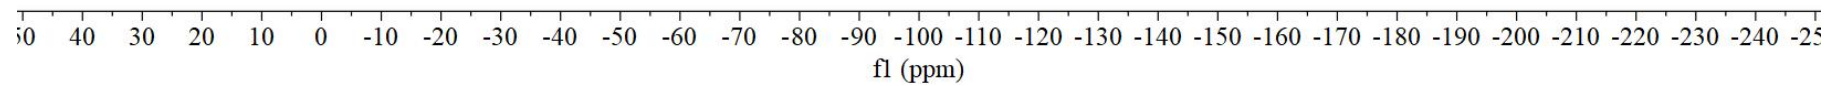



— 191.85

136.41  
130.76  
130.19  
130.05  
129.54  
128.73  
128.44  
127.98  
126.55  
125.2149.76  
49.50  
49.23  
48.9732.48  
30.11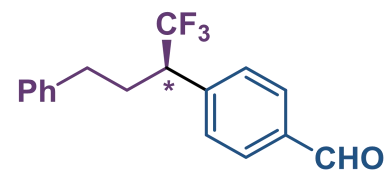<sup>13</sup>C NMR of **3f** (101 MHz, Chloroform-*d*, 298 K)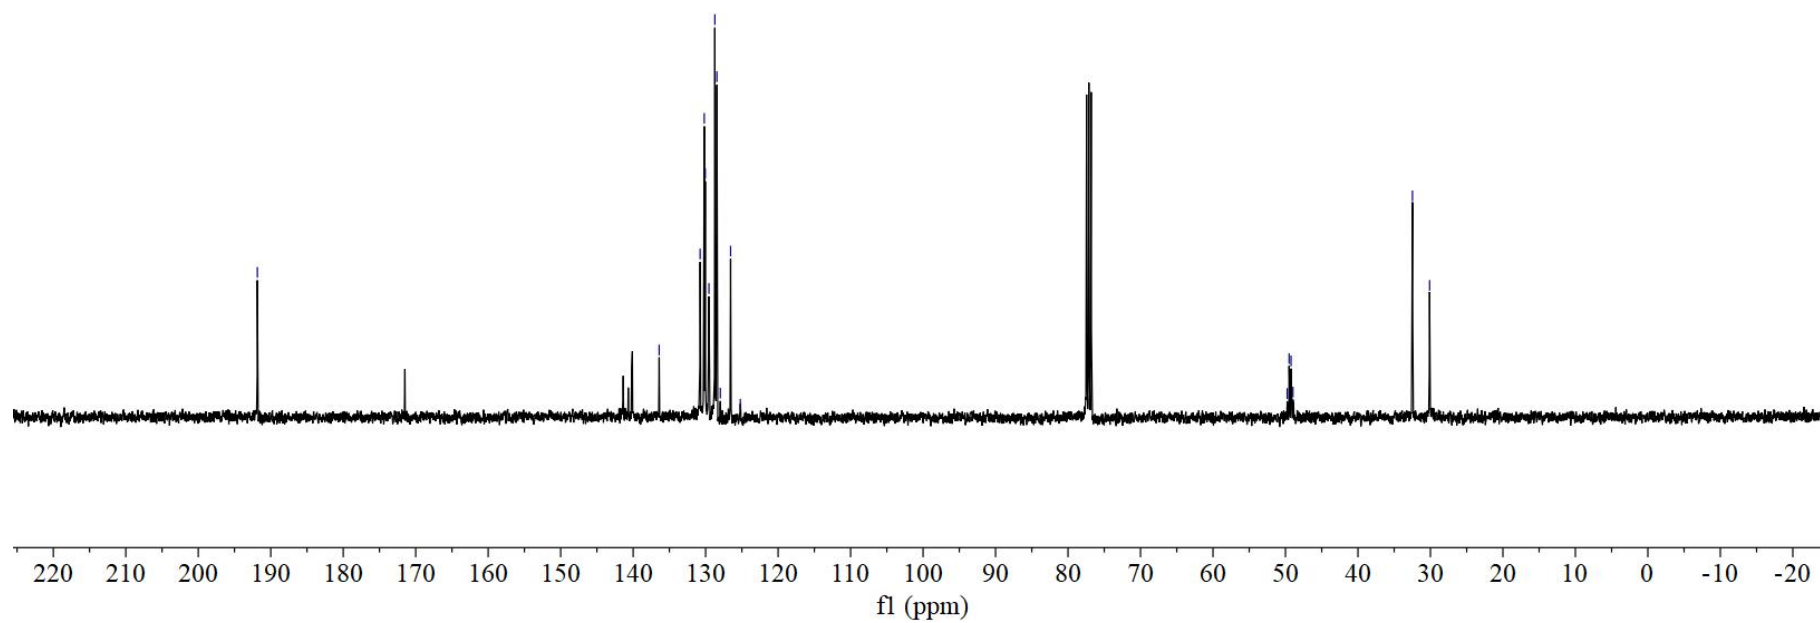

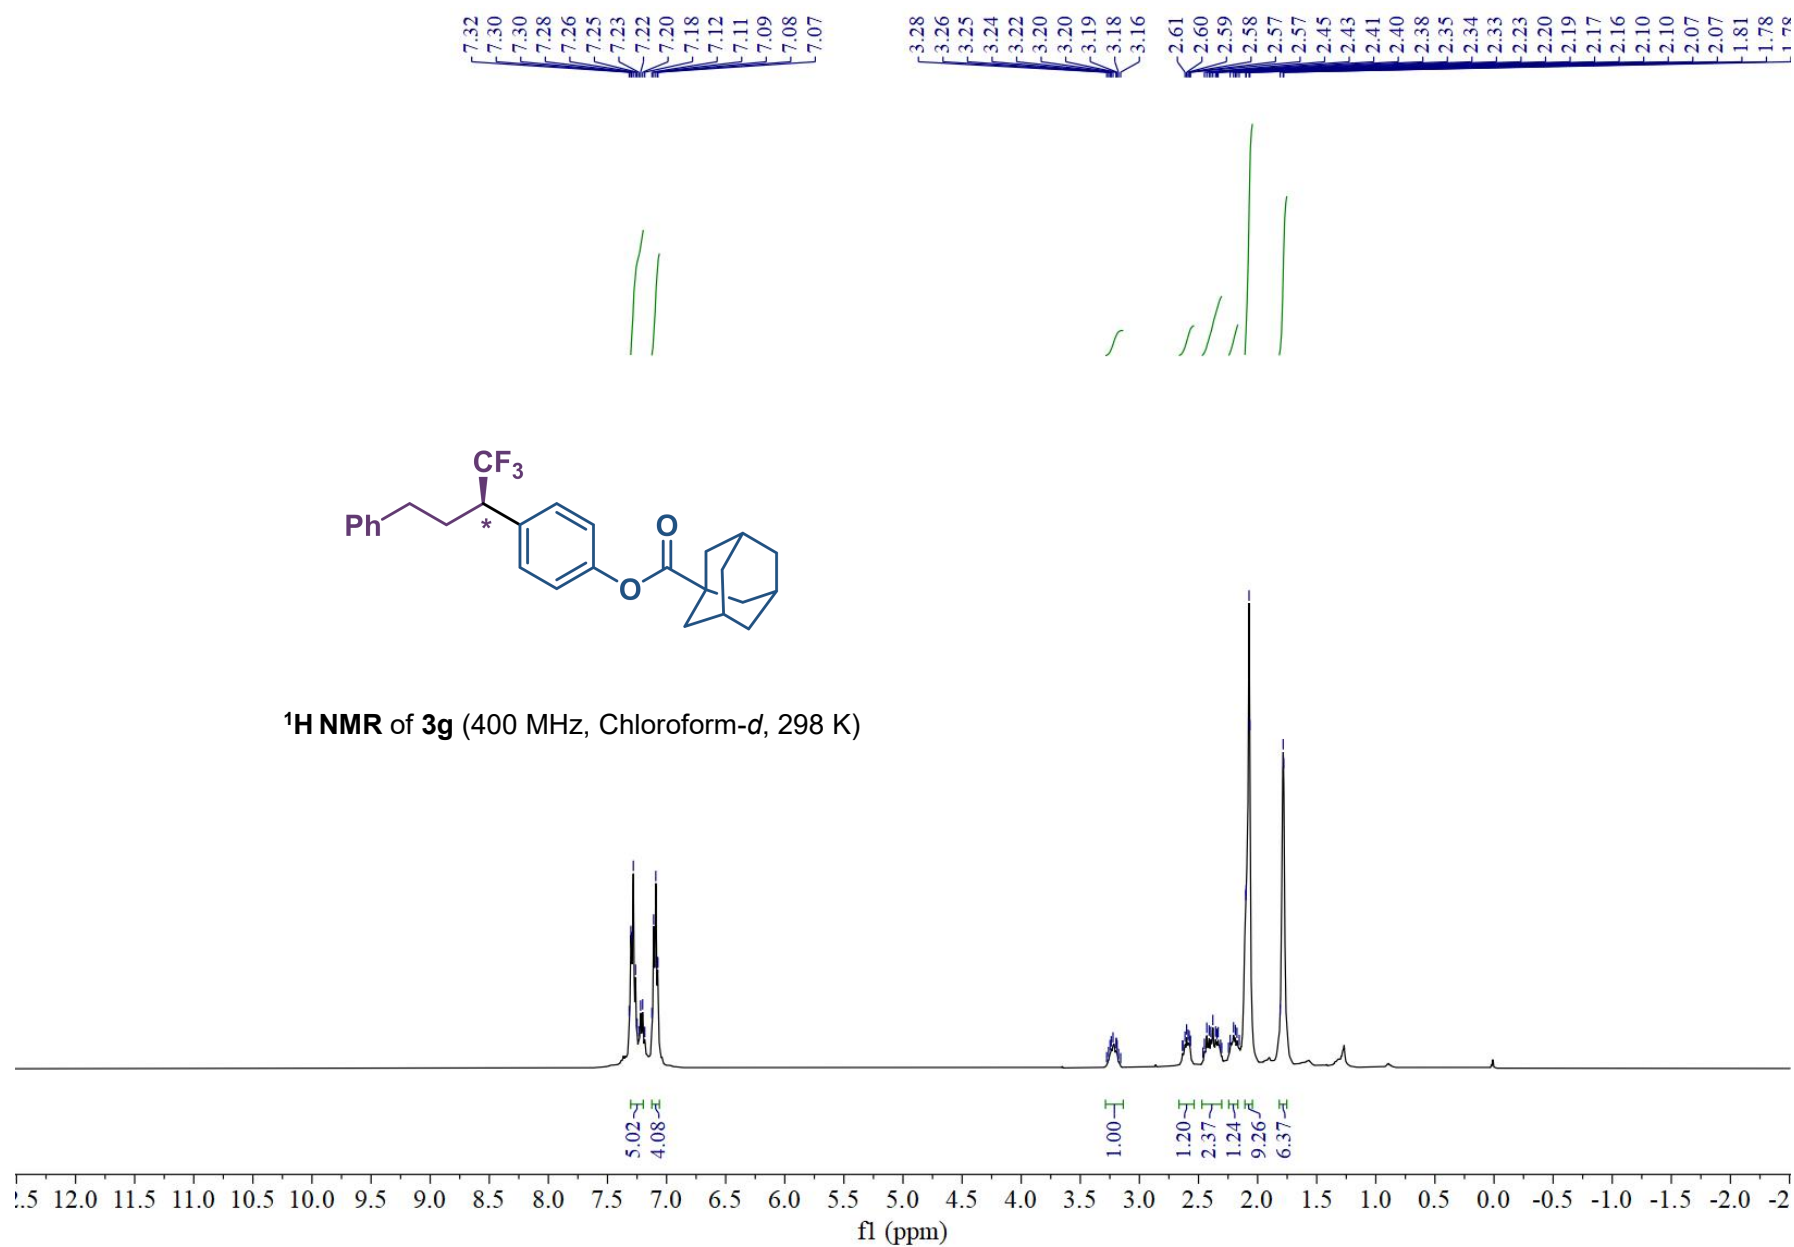

-69.68  
-69.70

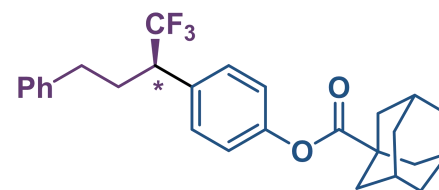

**<sup>19</sup>F NMR of 3g** (376 MHz, Chloroform-*d*, 298 K)

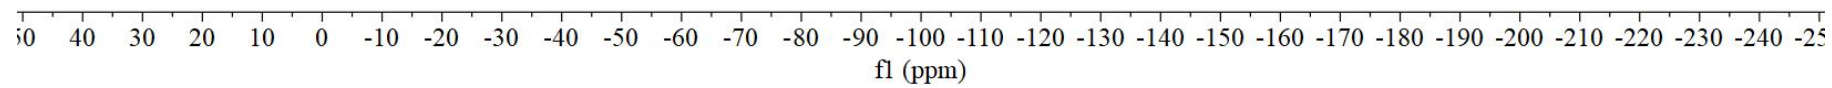

— 176.11  
— 151.15  
— 140.54  
— 131.65  
— 130.20  
— 128.64  
— 128.51  
— 126.37  
— 121.99  
  
— 48.76  
— 48.50  
— 41.17  
— 38.86  
— 36.54  
— 32.49  
— 30.19  
— 28.00

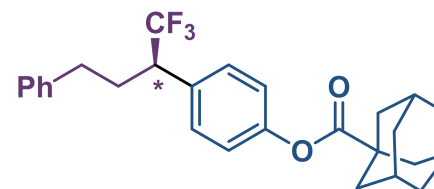

$^{13}\text{C}$  NMR of **3g** (101 MHz, Chloroform-*d*, 298 K)

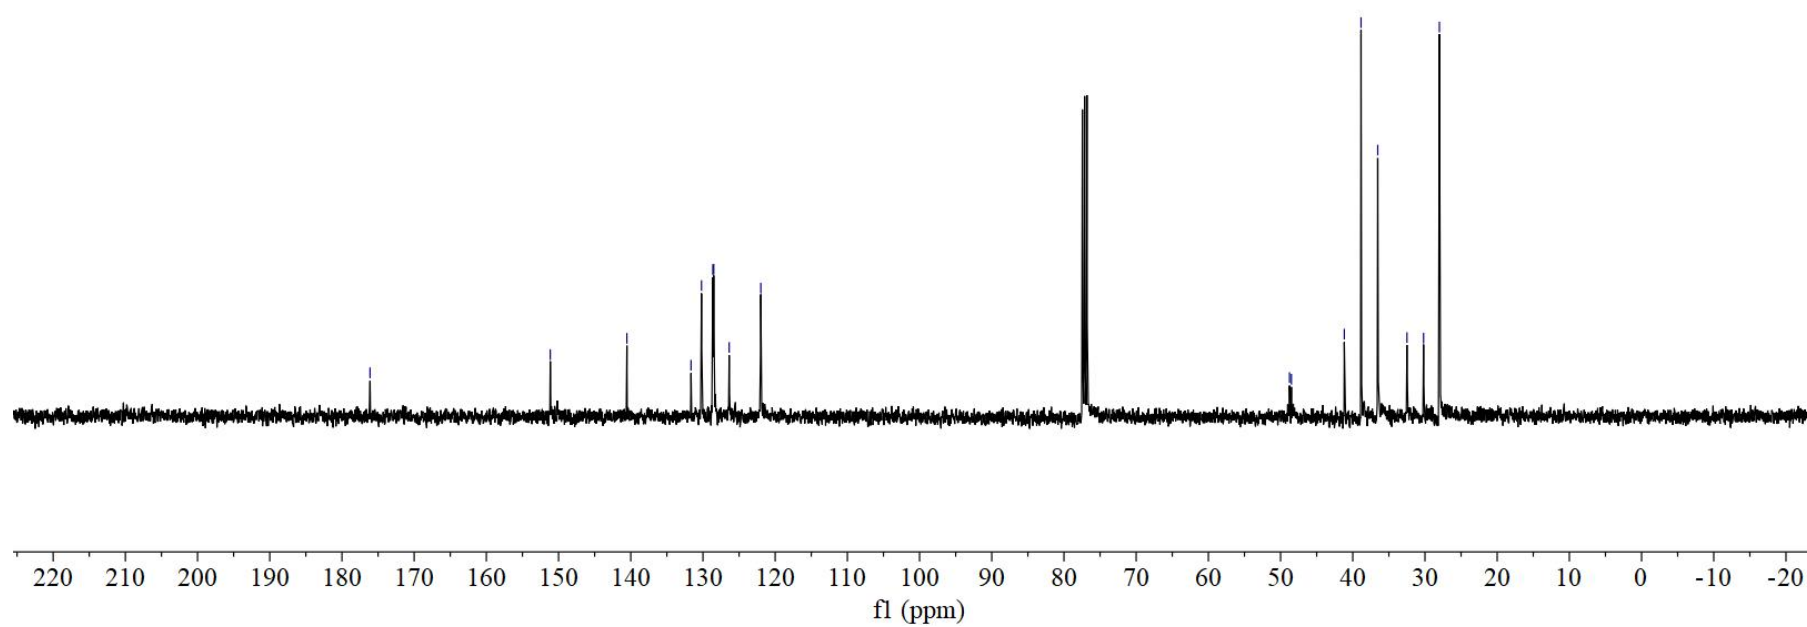

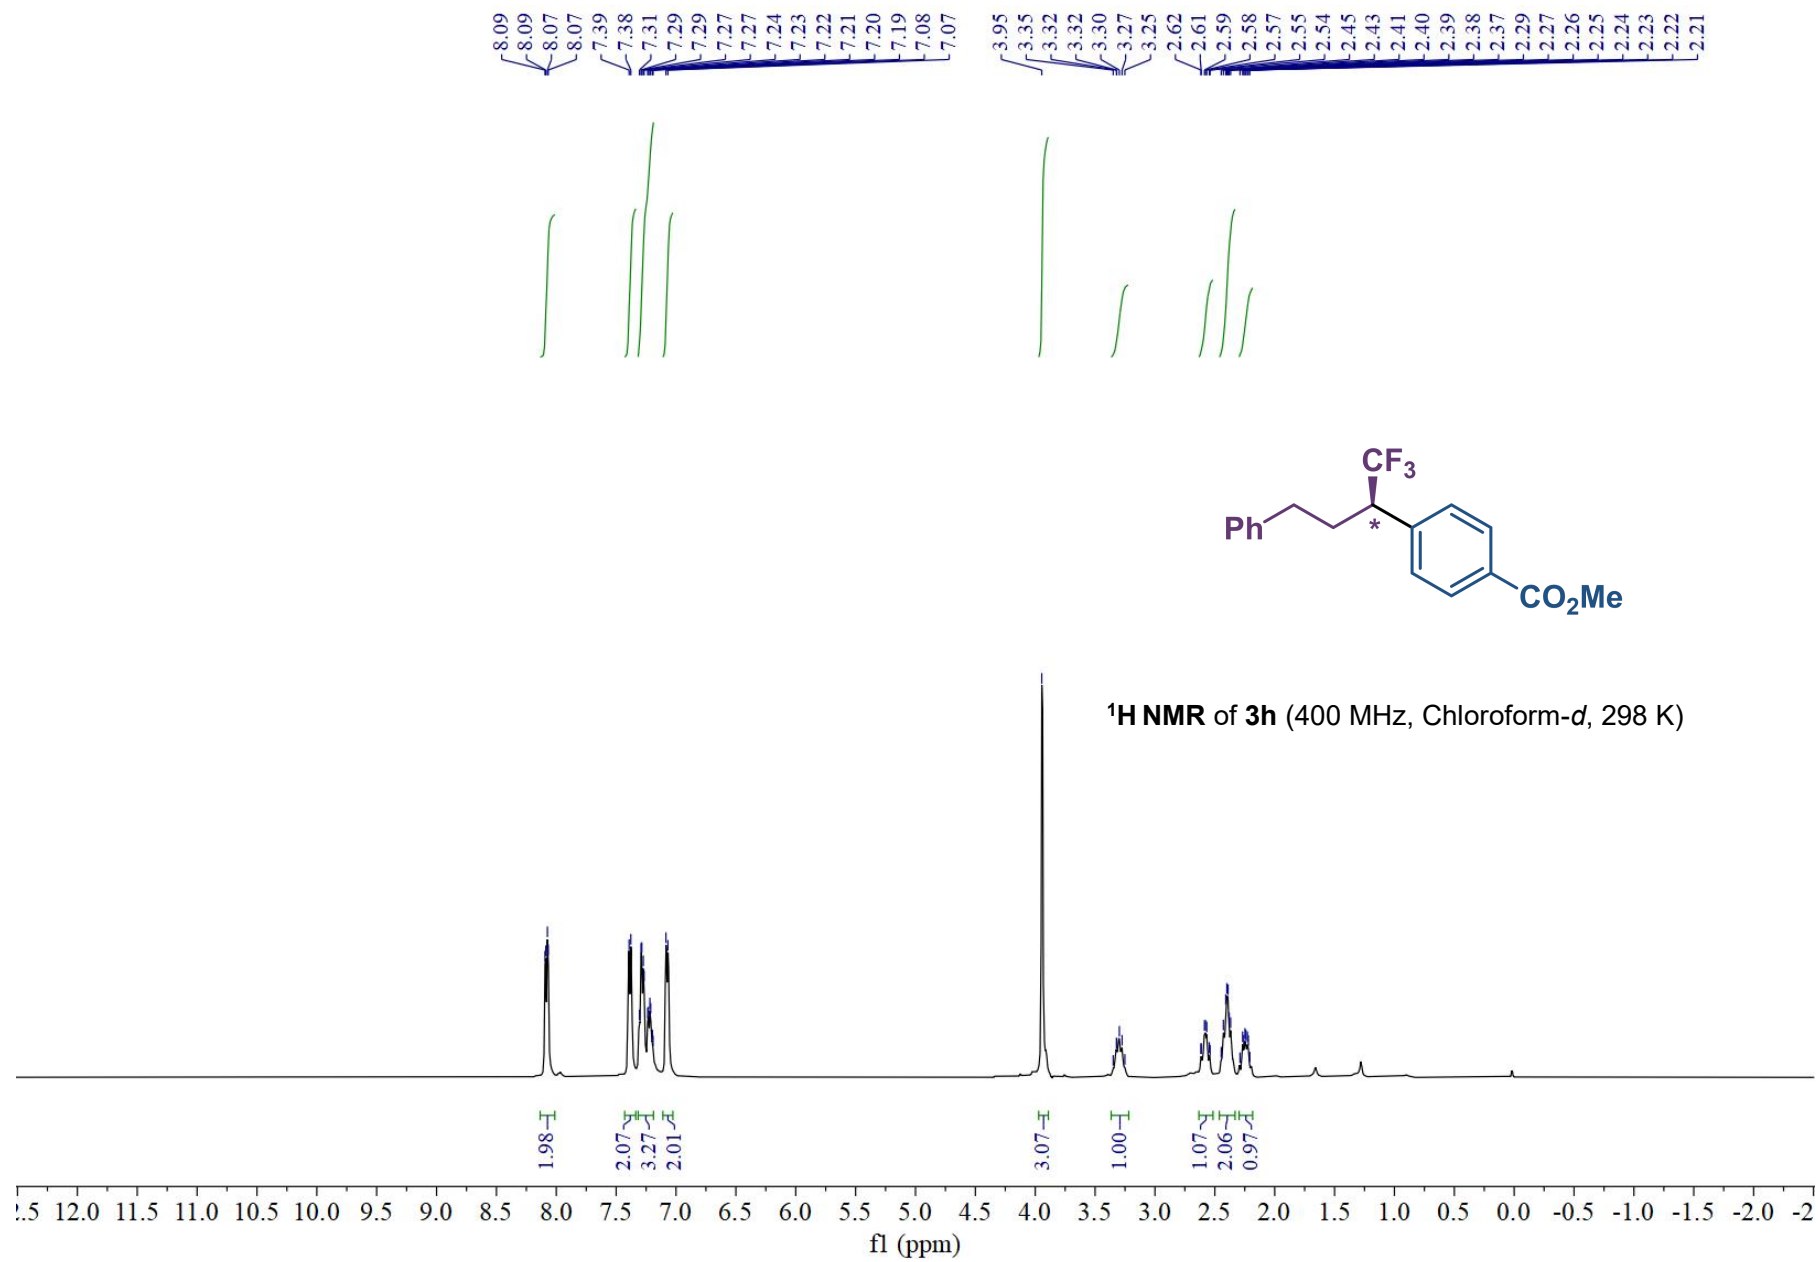

-69.23  
-69.26

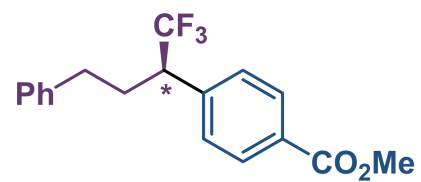

**<sup>19</sup>F NMR of 3h** (376 MHz, Chloroform-*d*, 298 K)

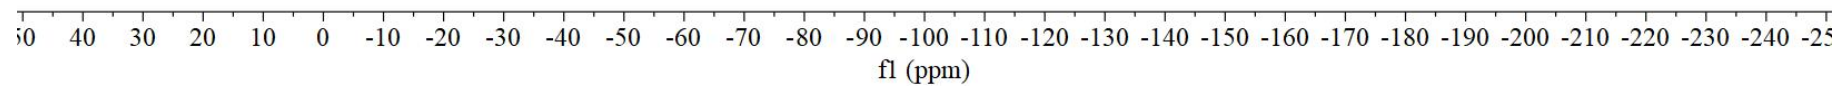

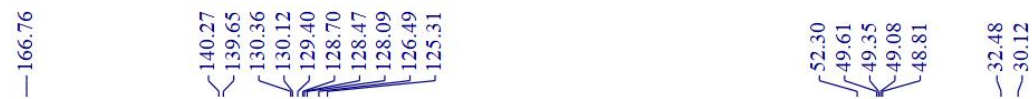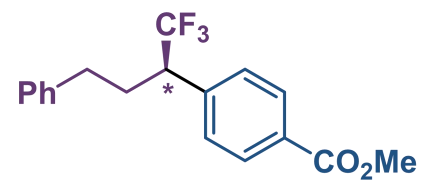

$^{13}\text{C}$  NMR of **3h** (101 MHz, Chloroform-*d*, 298 K)

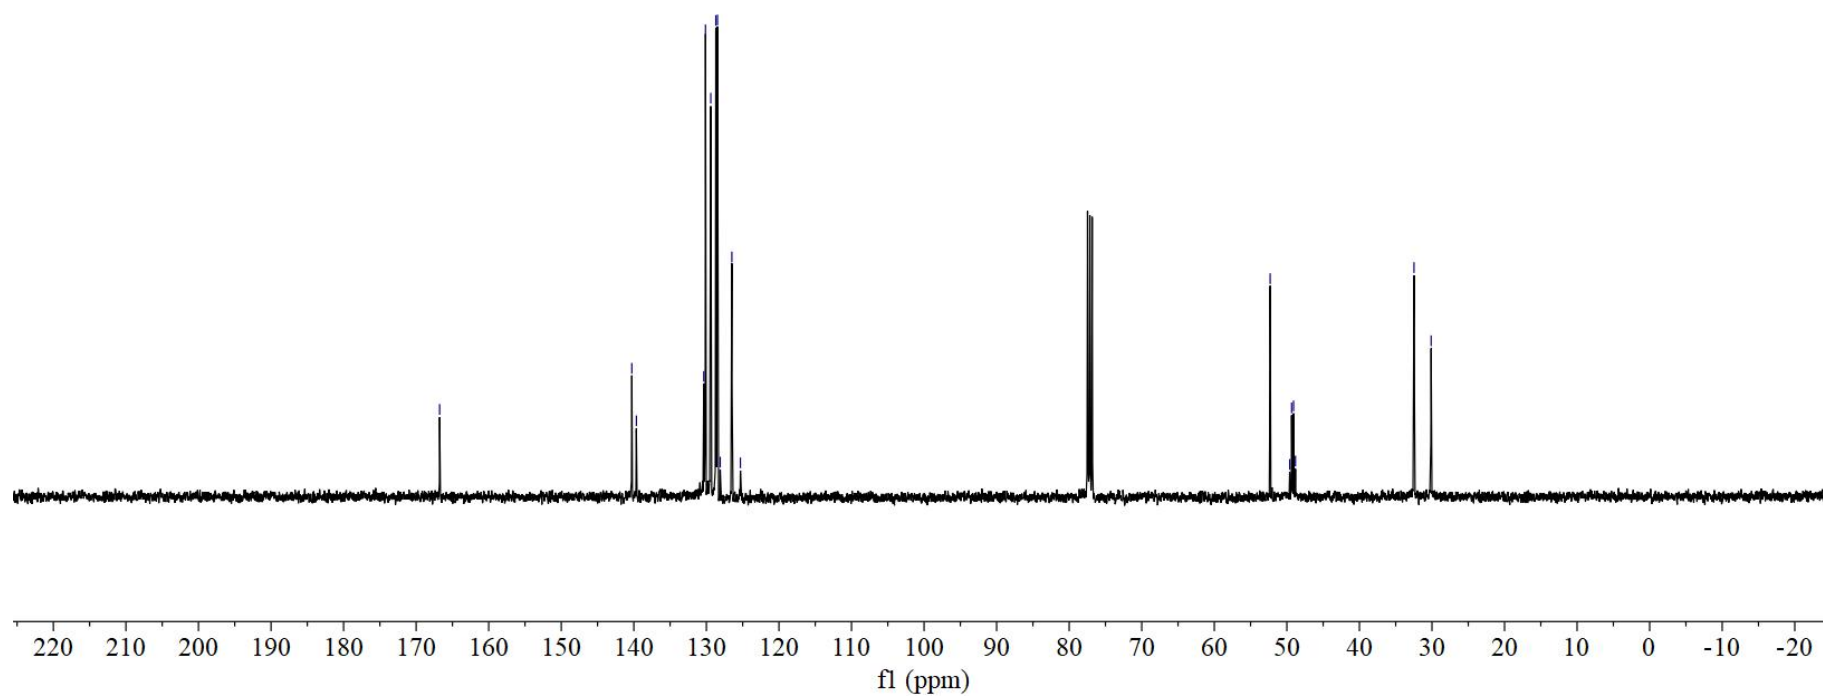

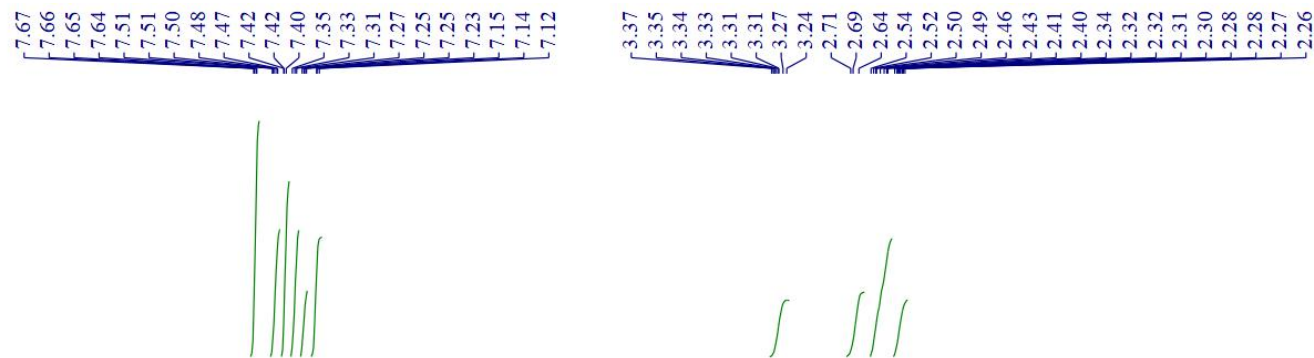

<sup>1</sup>H NMR of **3i** (400 MHz, Chloroform-*d*, 298 K)

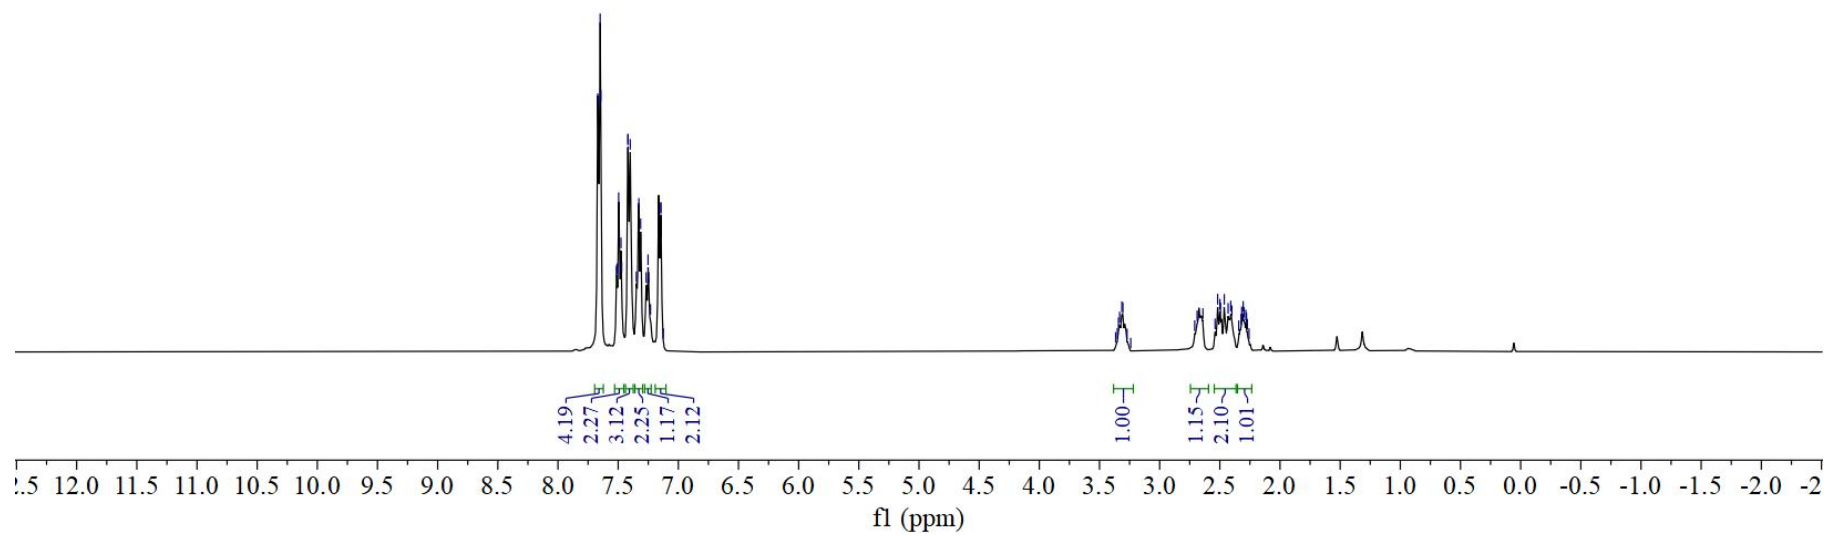



-69.40  
-69.43

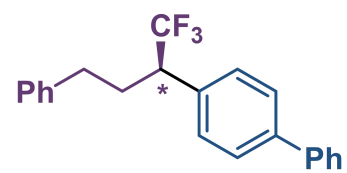

**<sup>19</sup>F NMR of 3i** (376 MHz, Chloroform-*d*, 298 K)

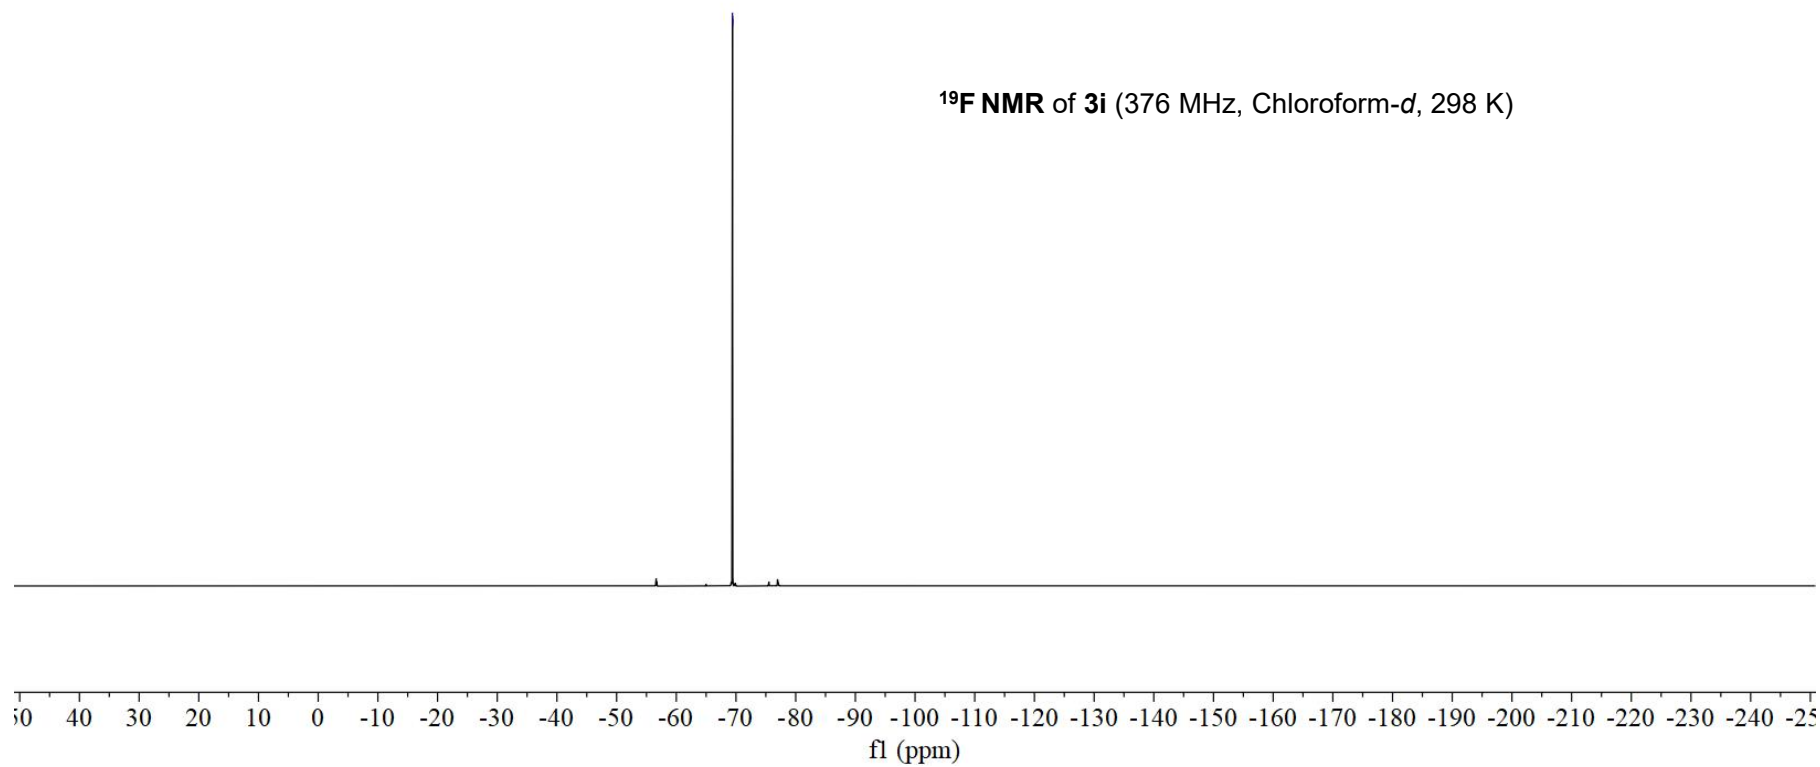

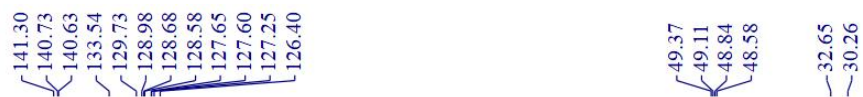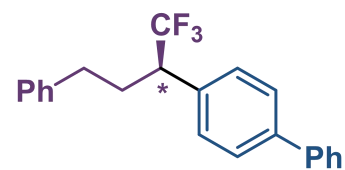

<sup>13</sup>C NMR of **3i** (101 MHz, Chloroform-*d*, 298 K)

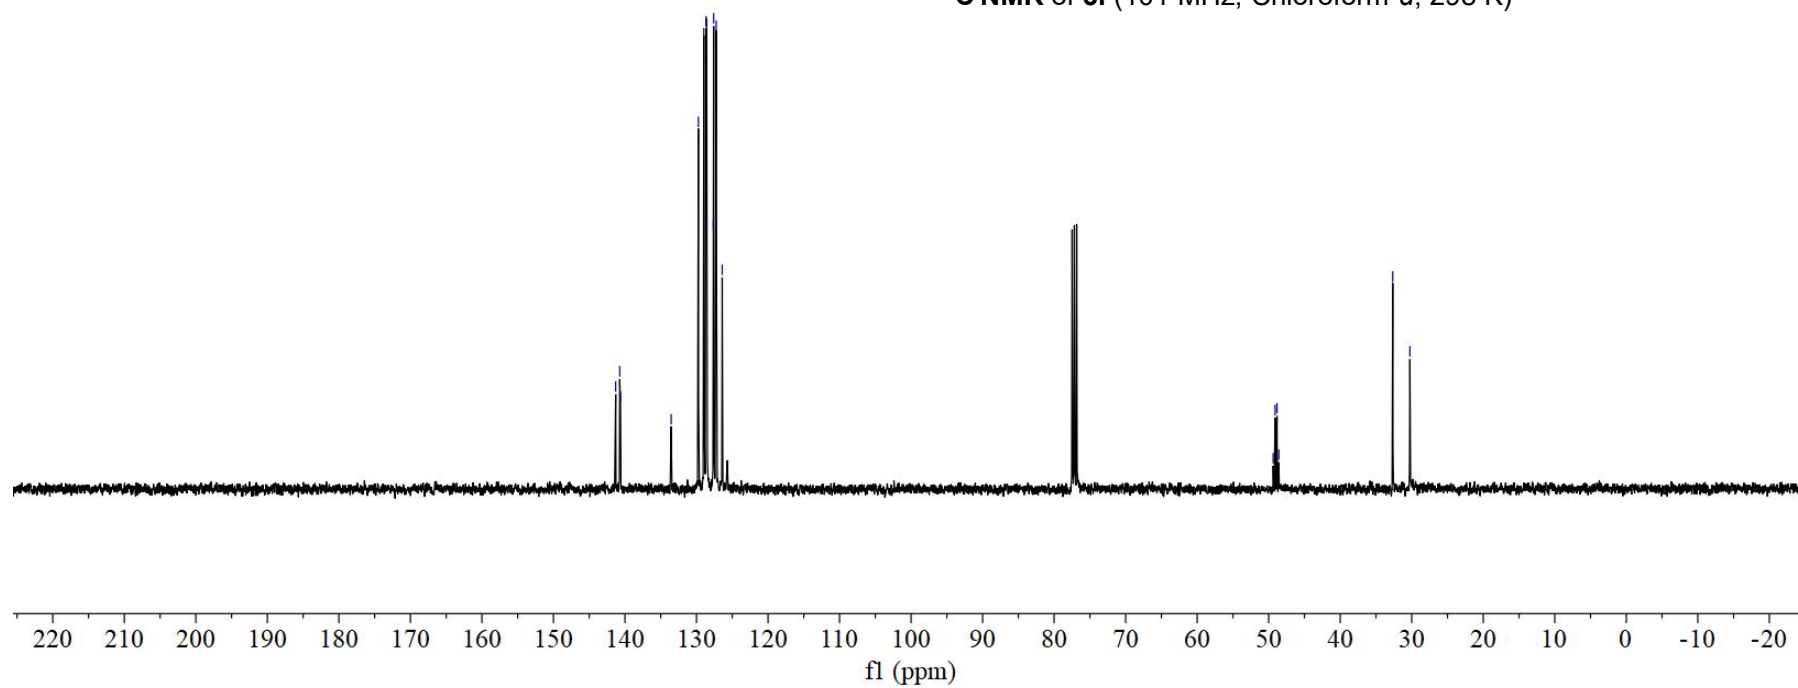

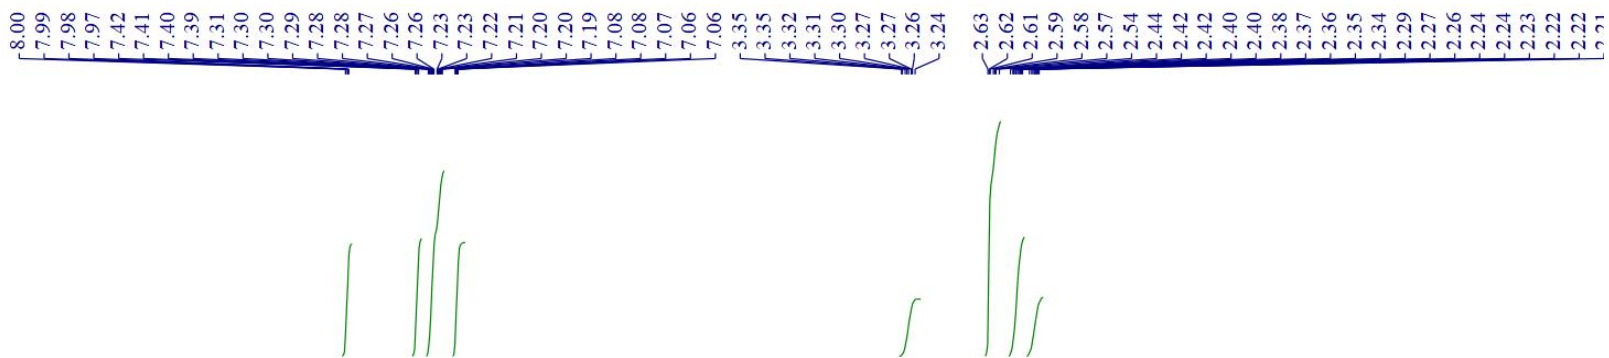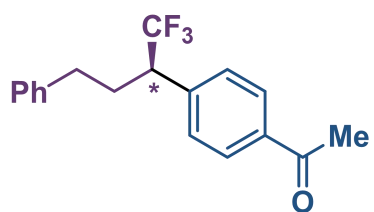

<sup>1</sup>H NMR of 3j (400 MHz, Chloroform-d, 298 K)

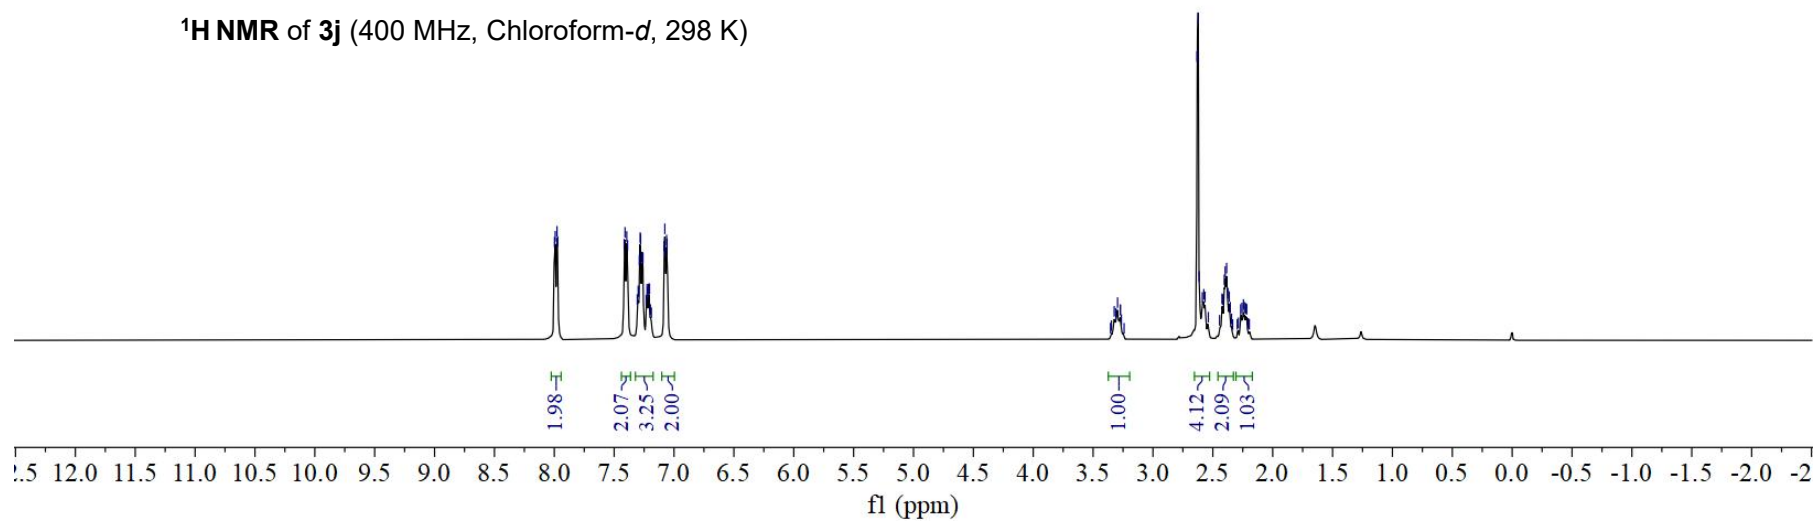

-69.22  
-69.25

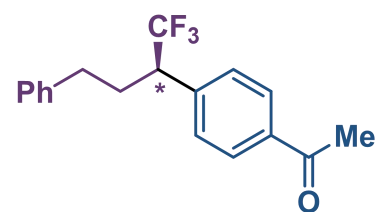

**<sup>19</sup>F NMR of 3j** (376 MHz, Chloroform-*d*, 298 K)

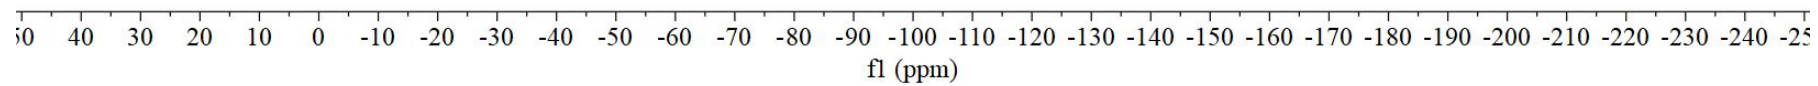

— 197.71

140.23  
139.82  
137.17  
129.60  
128.86  
128.70  
128.46  
126.5149.57  
49.30  
49.04  
48.7732.46  
30.08  
26.75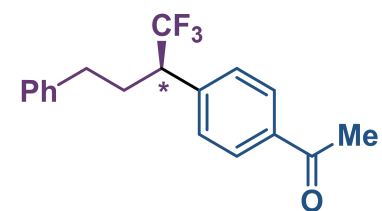<sup>13</sup>C NMR of **3j** (101 MHz, Chloroform-*d*, 298 K)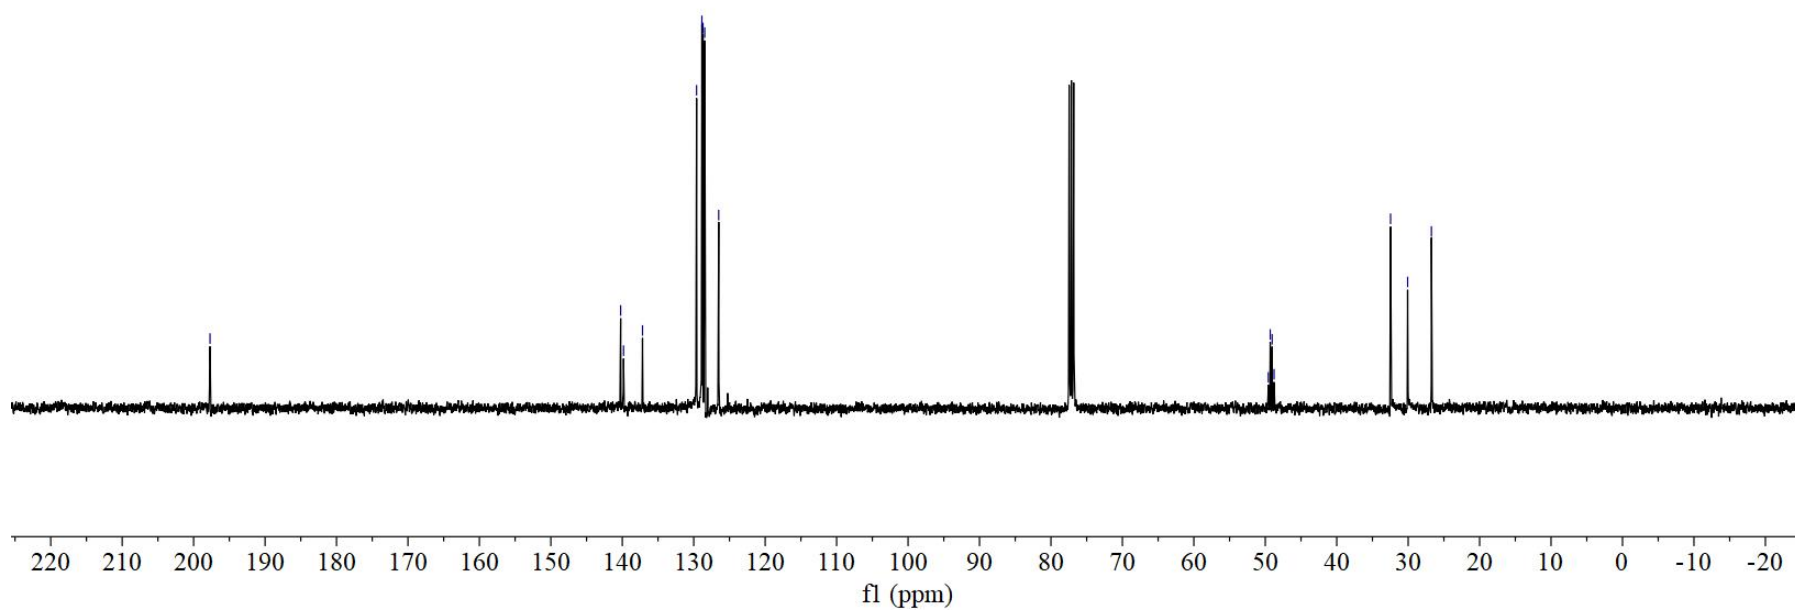

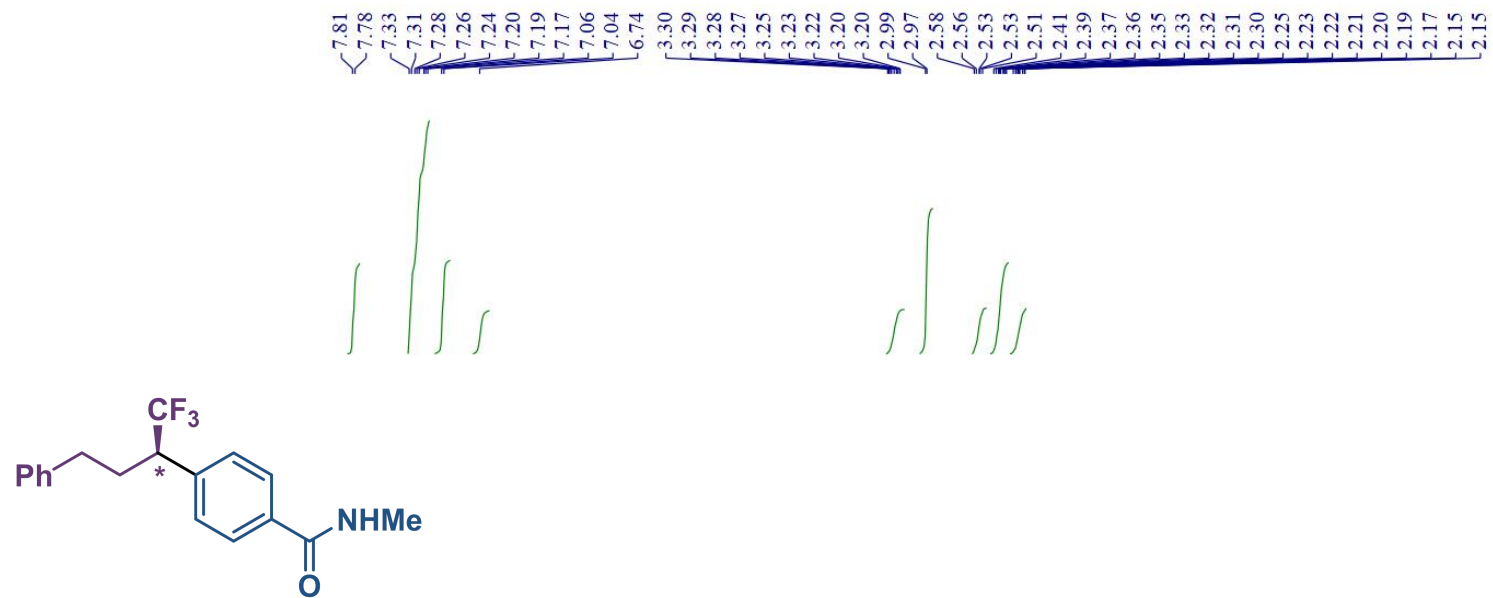

<sup>1</sup>H NMR of **3k** (400 MHz, Chloroform-d, 298 K)

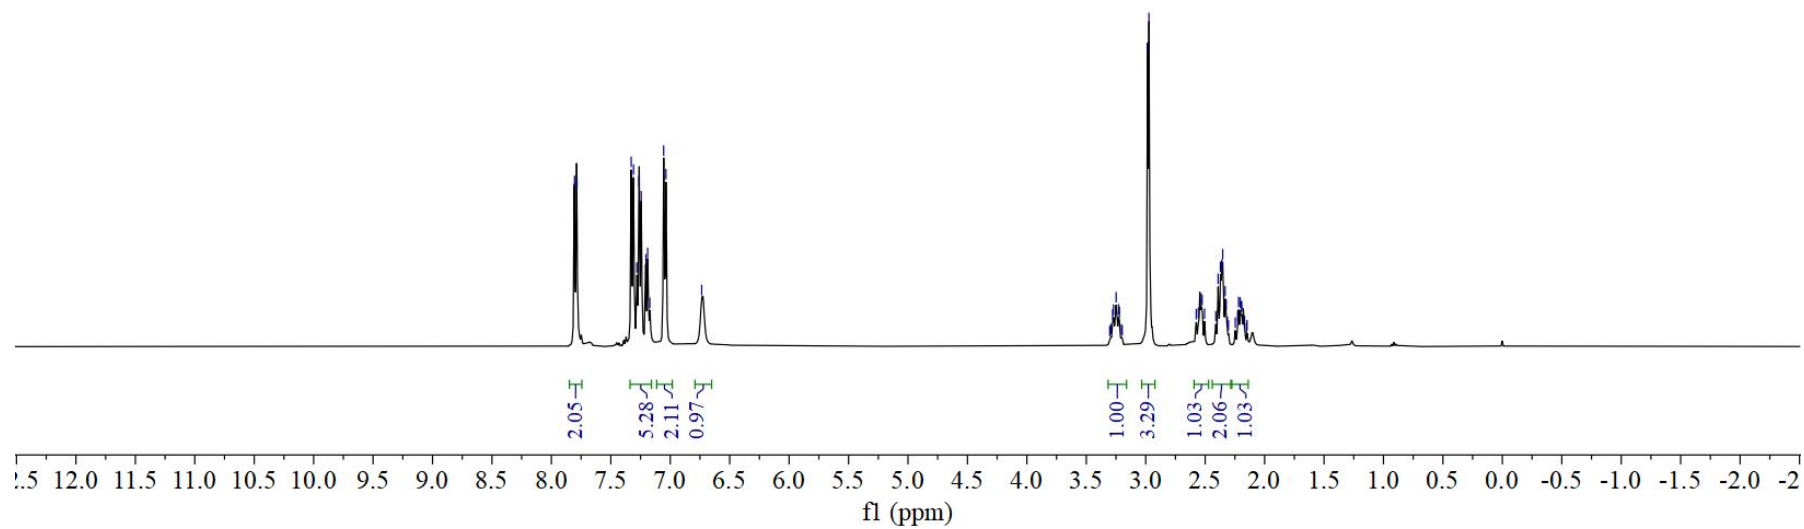

-69.32  
-69.34

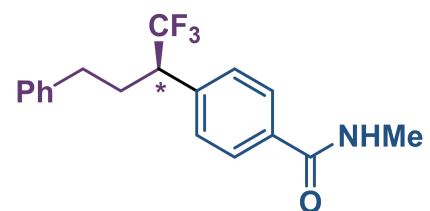

<sup>19</sup>F NMR of **3k** (376 MHz, Chloroform-*d*, 298 K)

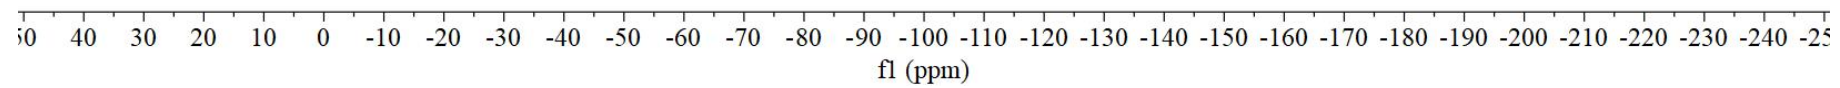

— 168.08

140.31  
137.89  
134.82  
129.45  
128.66  
128.44  
127.51  
126.45

49.44  
49.18  
48.91  
48.64

32.44  
30.06  
26.92

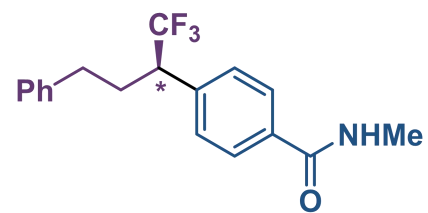

<sup>13</sup>C NMR of **3k** (101 MHz, Chloroform-*d*, 298 K)

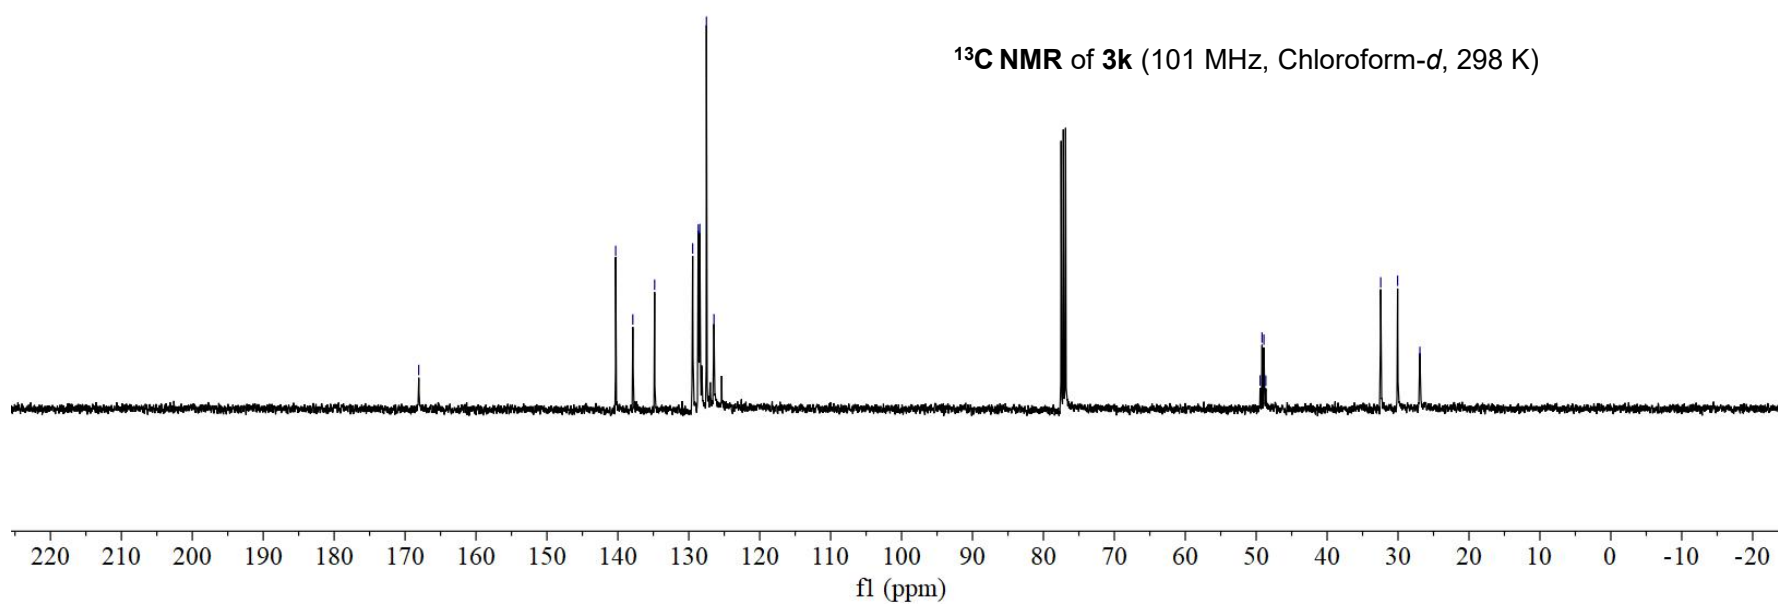



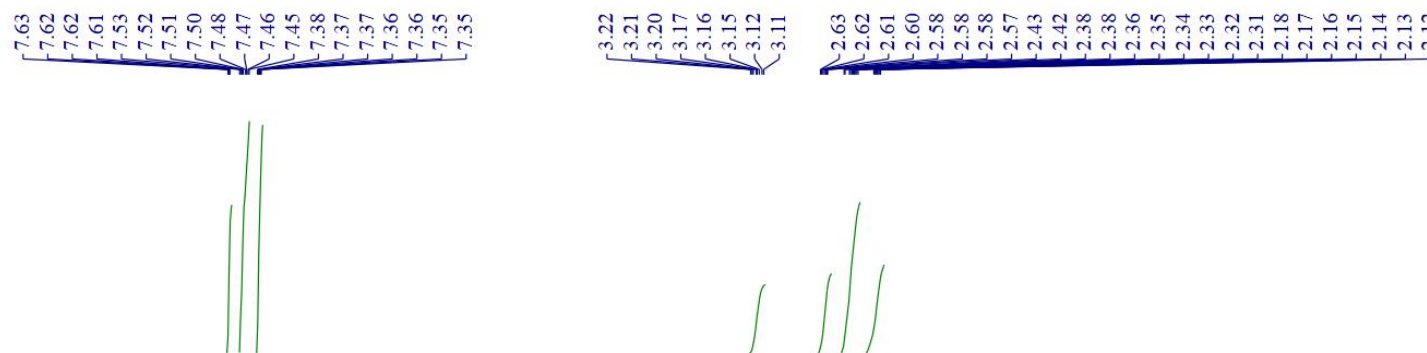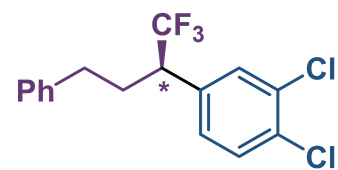

<sup>1</sup>H NMR of 3I (400 MHz, Chloroform-*d*, 298 K)

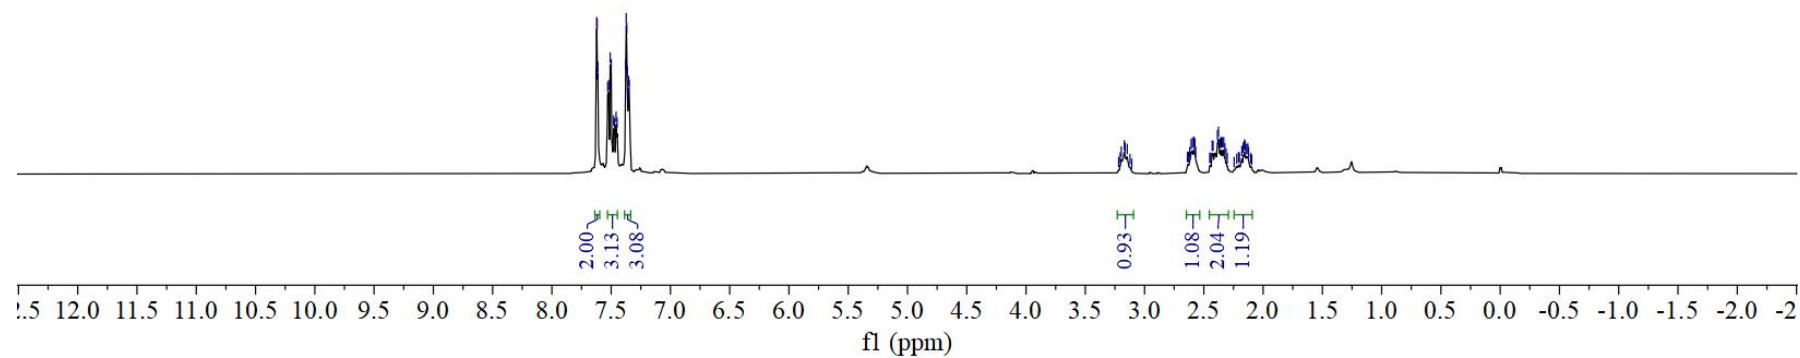

-69.57  
-69.59

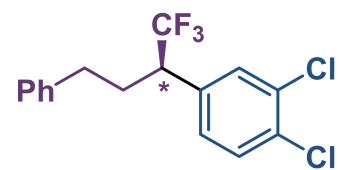

**<sup>19</sup>F NMR of 3I** (376 MHz, Chloroform-*d*, 298 K)

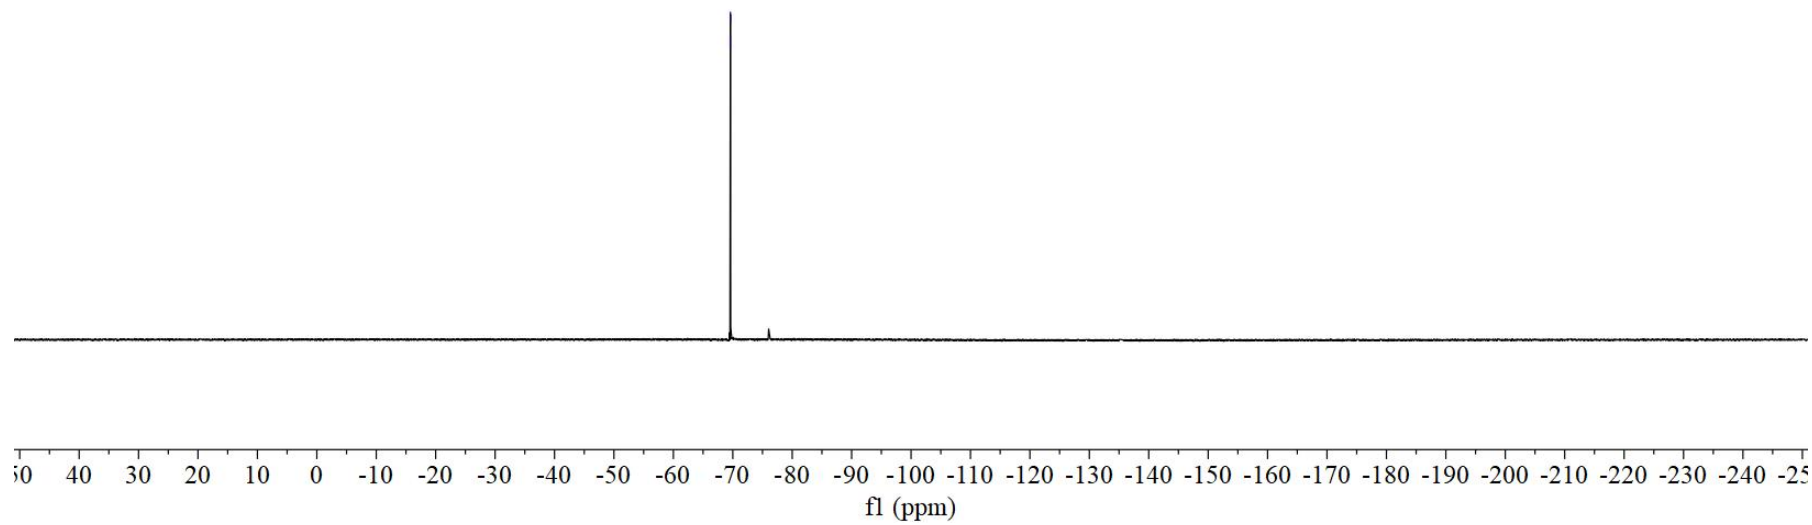

138.82  
132.57  
131.22  
131.06  
130.87  
128.90  
128.74  
128.59  
128.43  
126.57  
126.25  
125.70

49.07  
48.80  
48.54  
48.28

32.41  
29.95

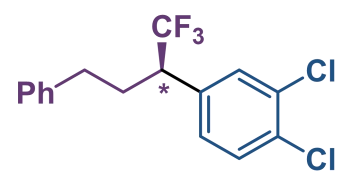

<sup>13</sup>C NMR of 3I (101 MHz, Chloroform-*d*, 298 K)

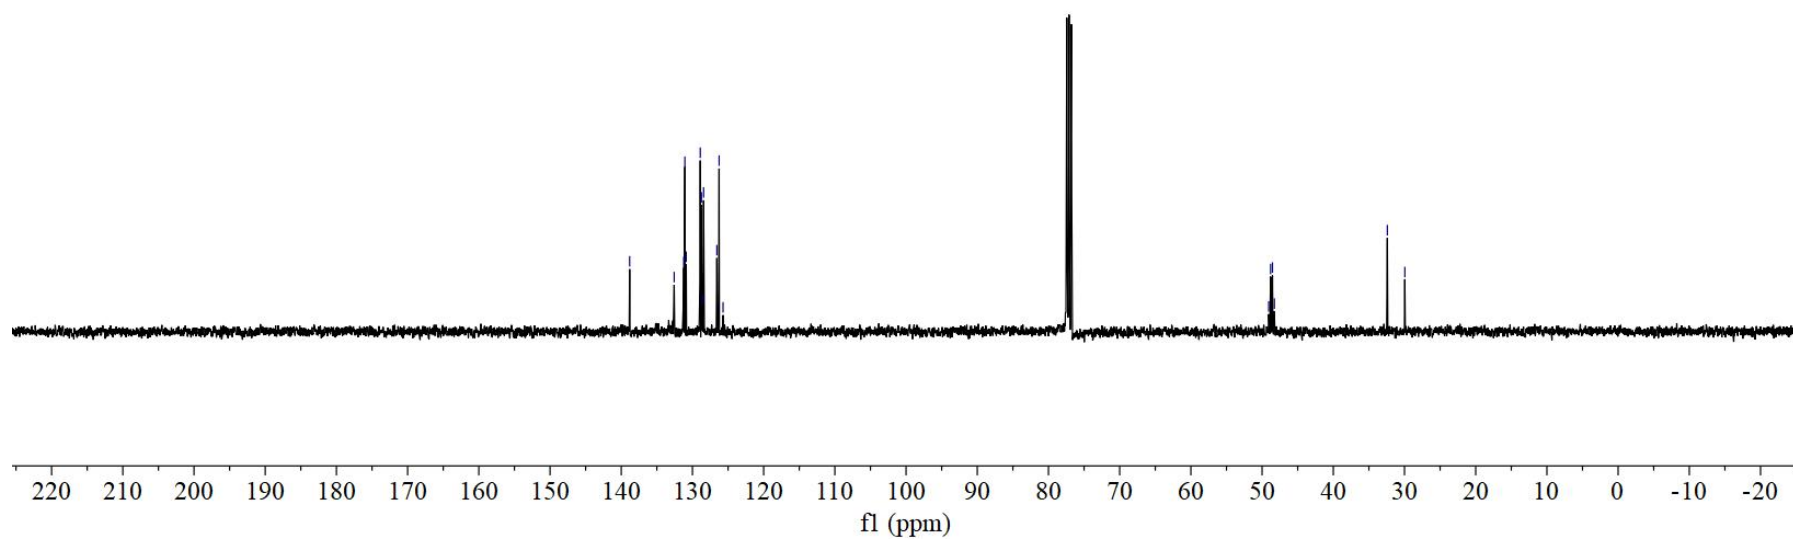

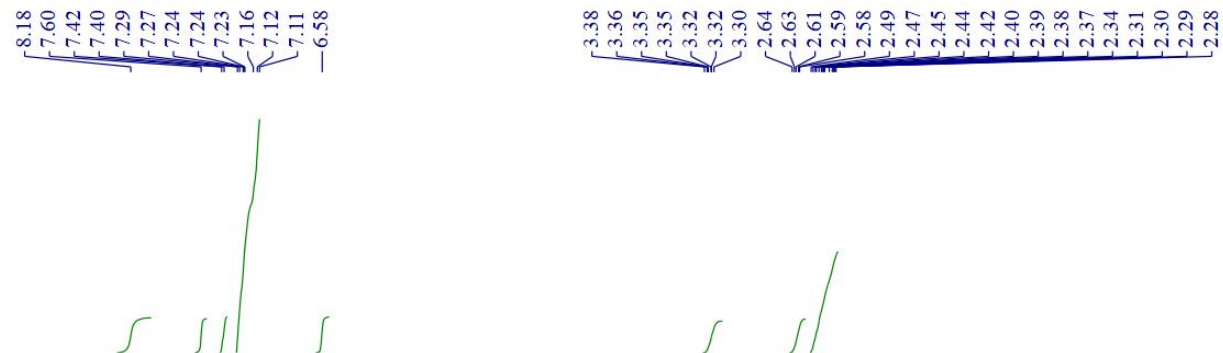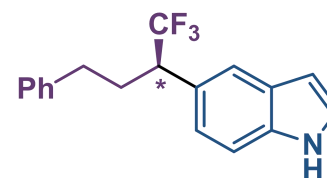

<sup>1</sup>H NMR of 3m (400 MHz, Chloroform-*d*, 298 K)

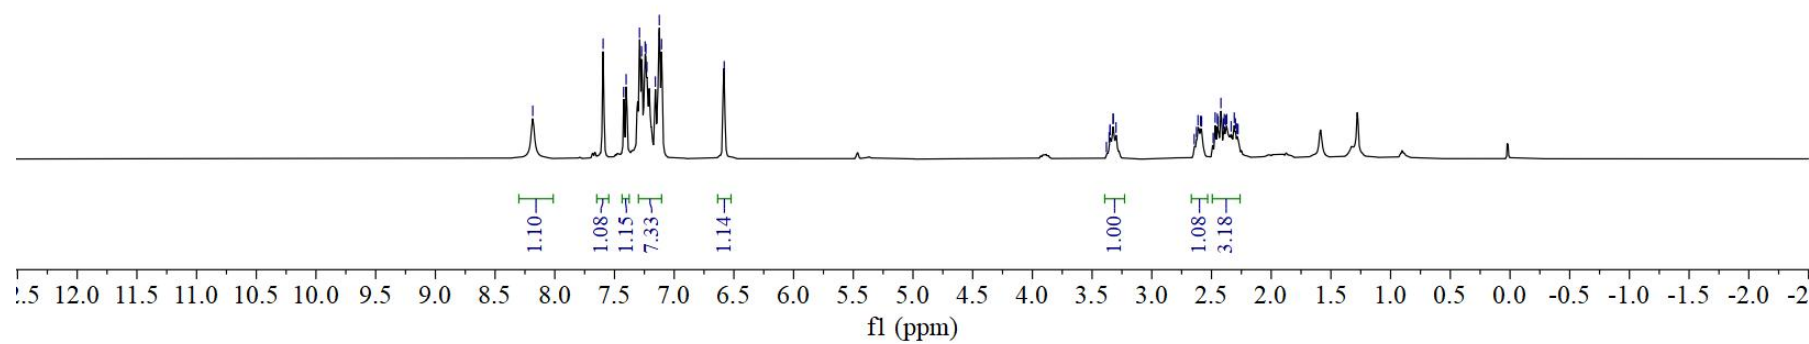

-69.64  
-69.66



**<sup>19</sup>F NMR of 3m (376 MHz, Chloroform-*d*, 298 K)**

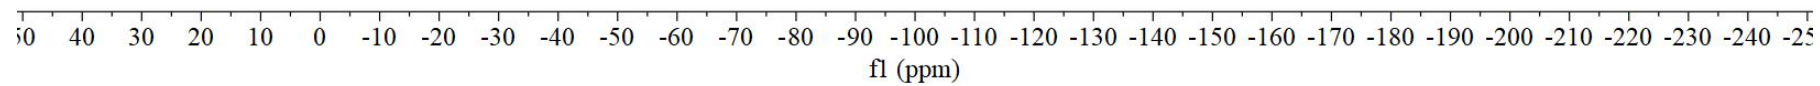

141.14  
135.69  
128.85  
128.56  
128.20  
126.21  
125.76  
124.98  
123.04  
121.70  
— 111.38  
— 102.84  
49.48  
49.22  
32.72  
30.62

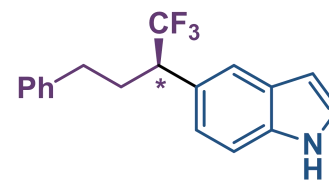

$^{13}\text{C}$  NMR of **3m** (101 MHz, Chloroform-*d*, 298 K)

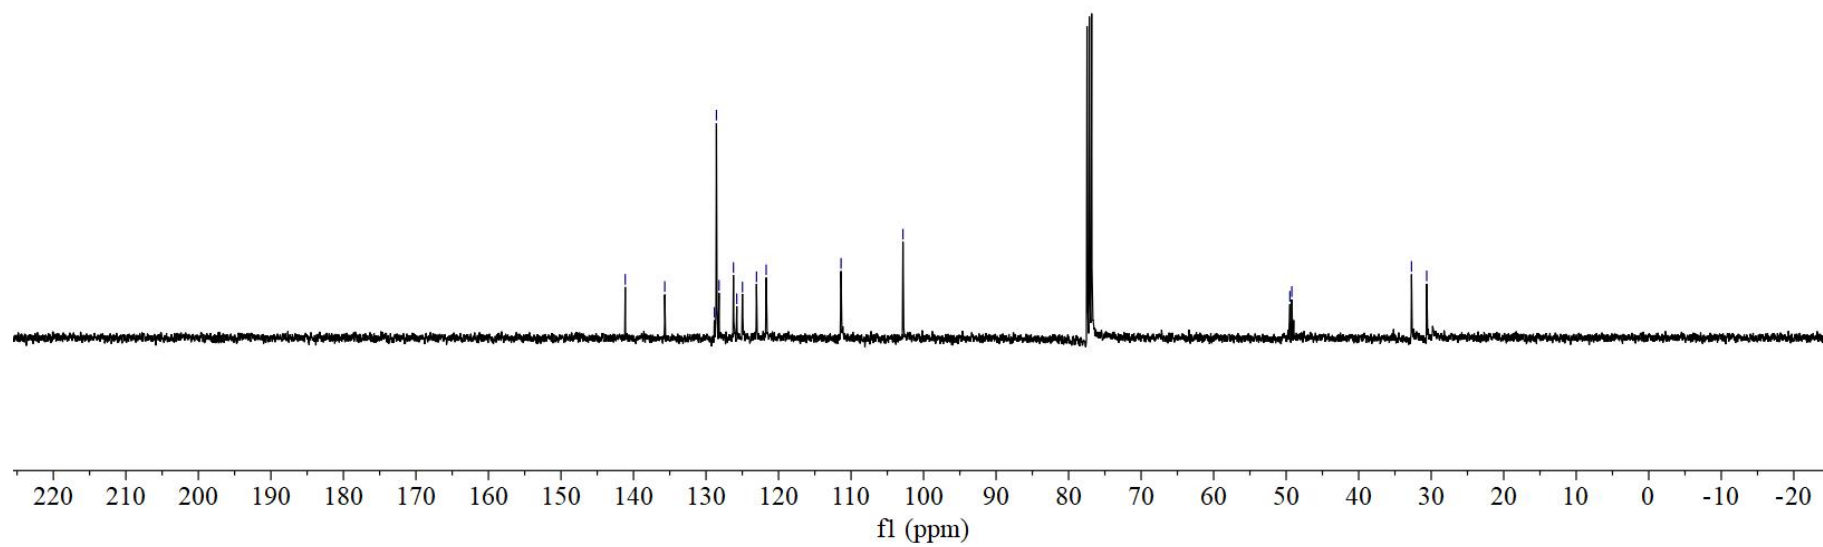

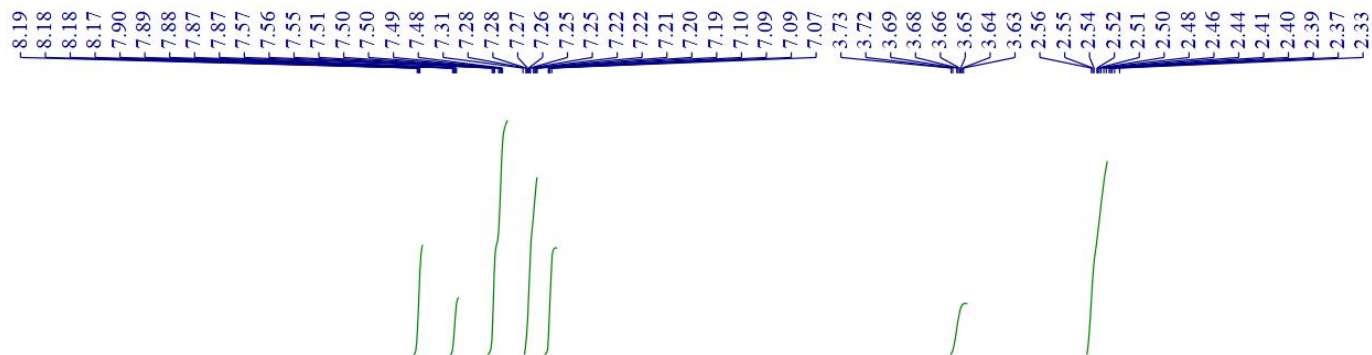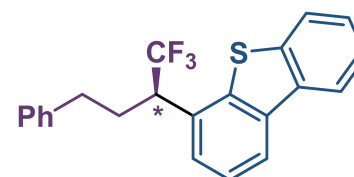

$^1\text{H NMR}$  of **3n** (400 MHz, Chloroform-*d*, 298 K)

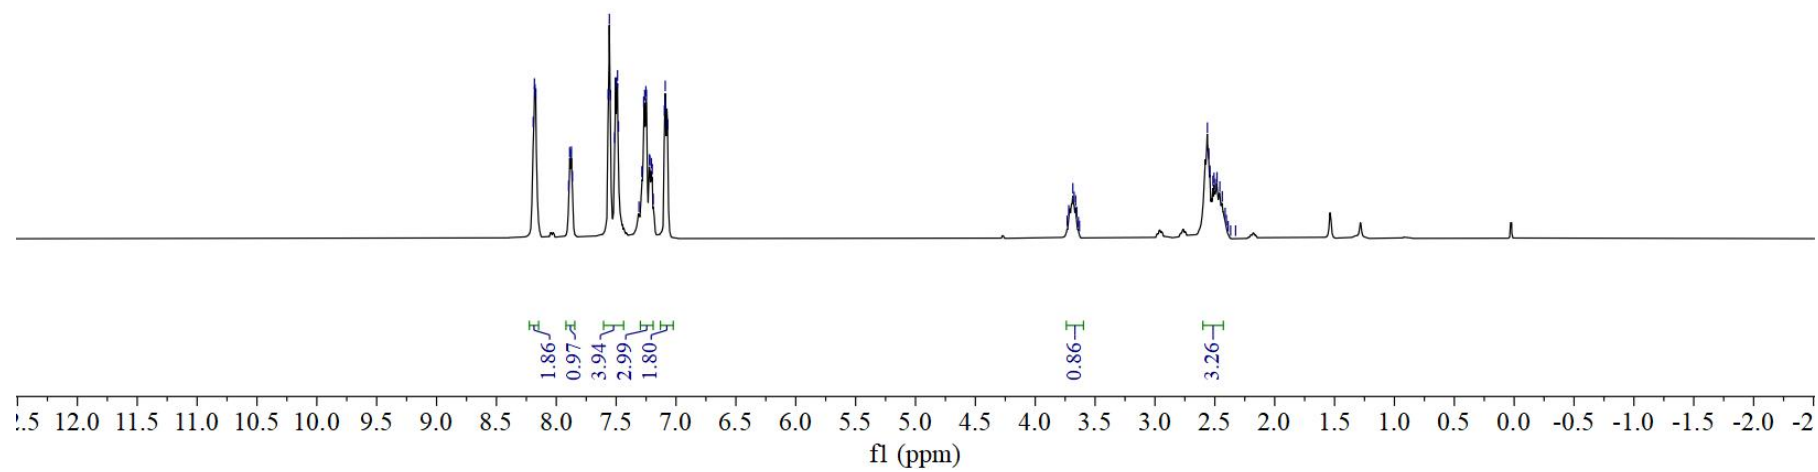

-69.57  
-69.59

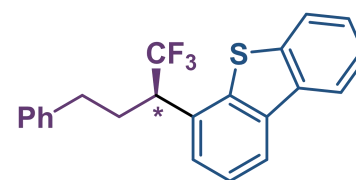

**<sup>19</sup>F NMR of 3n** (376 MHz, Chloroform-*d*, 298 K)

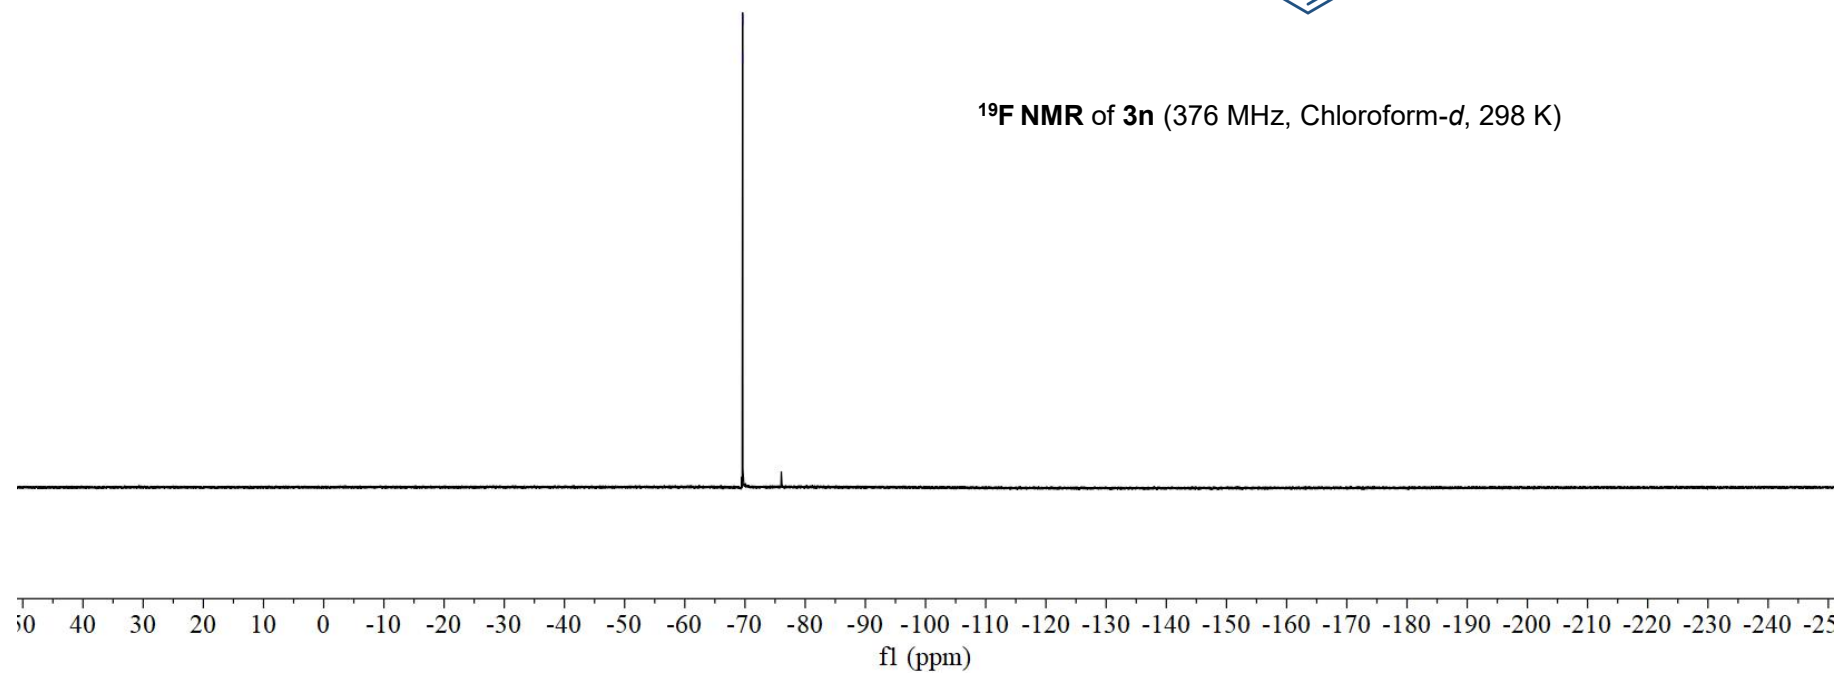



141.73  
140.58  
138.82  
136.32  
136.04  
129.38  
128.63  
128.52  
127.20  
126.38  
125.57  
125.29  
124.79  
122.84  
121.92  
121.60

48.48  
48.21

32.69  
30.70

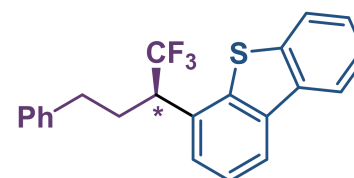

$^{13}\text{C}$  NMR of **3n** (101 MHz, Chloroform-*d*, 298 K)

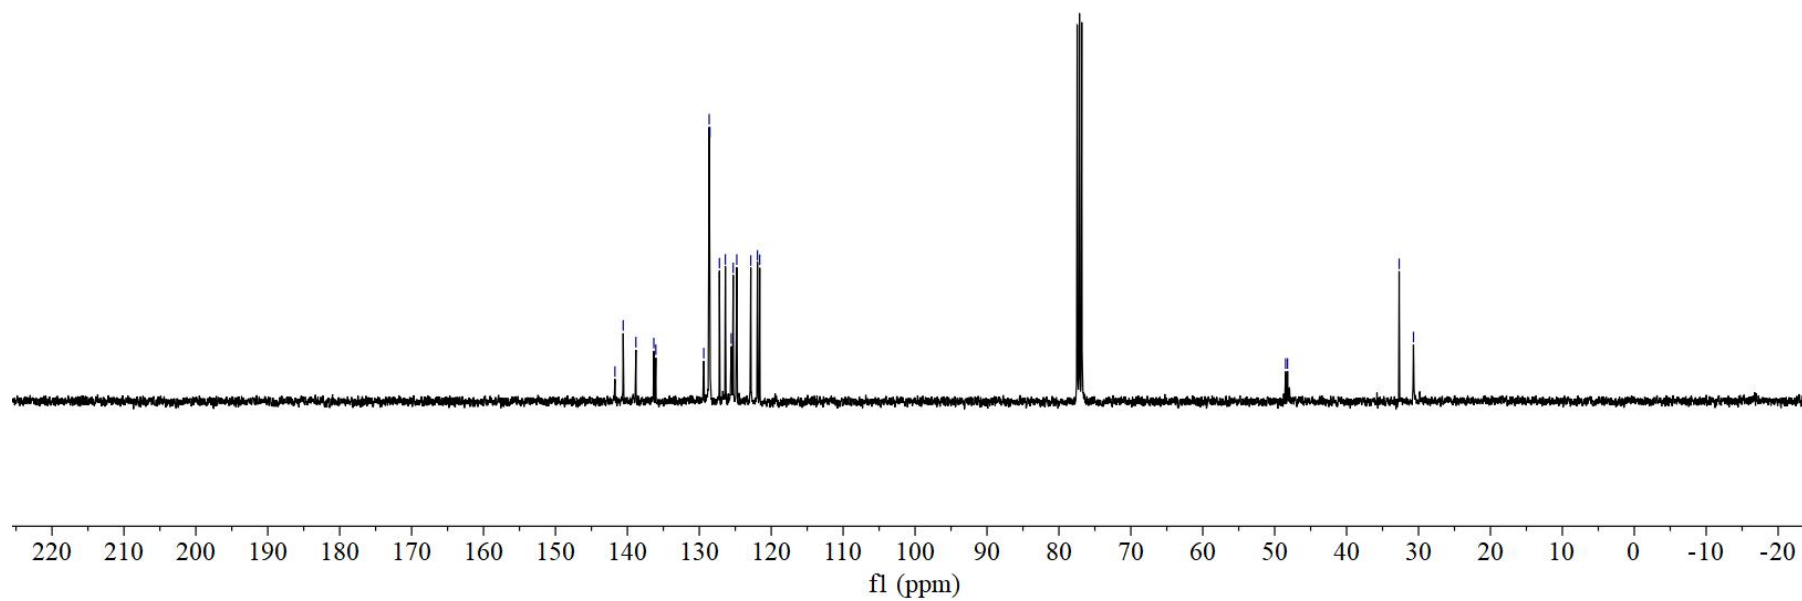

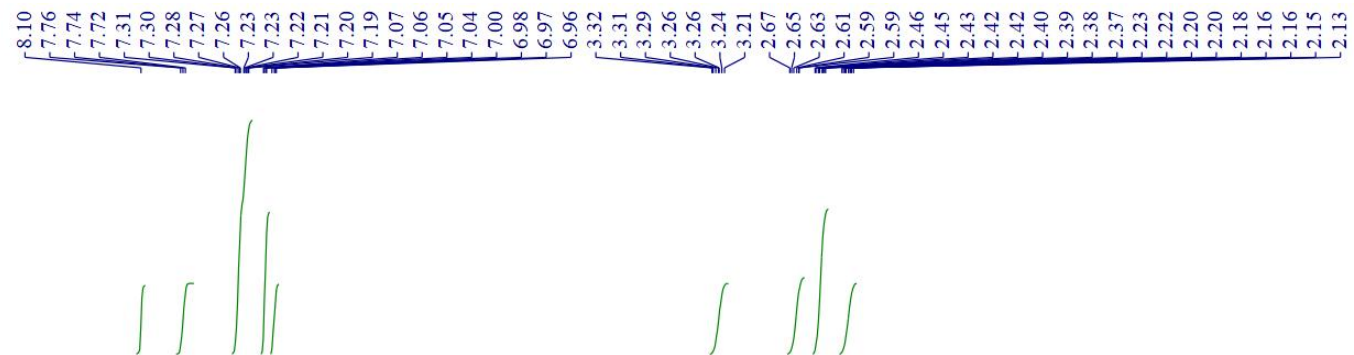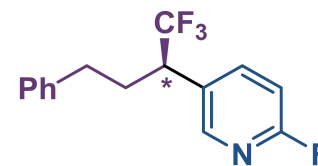

$^1\text{H}$  NMR of **3o** (400 MHz, Chloroform-*d*, 298 K)

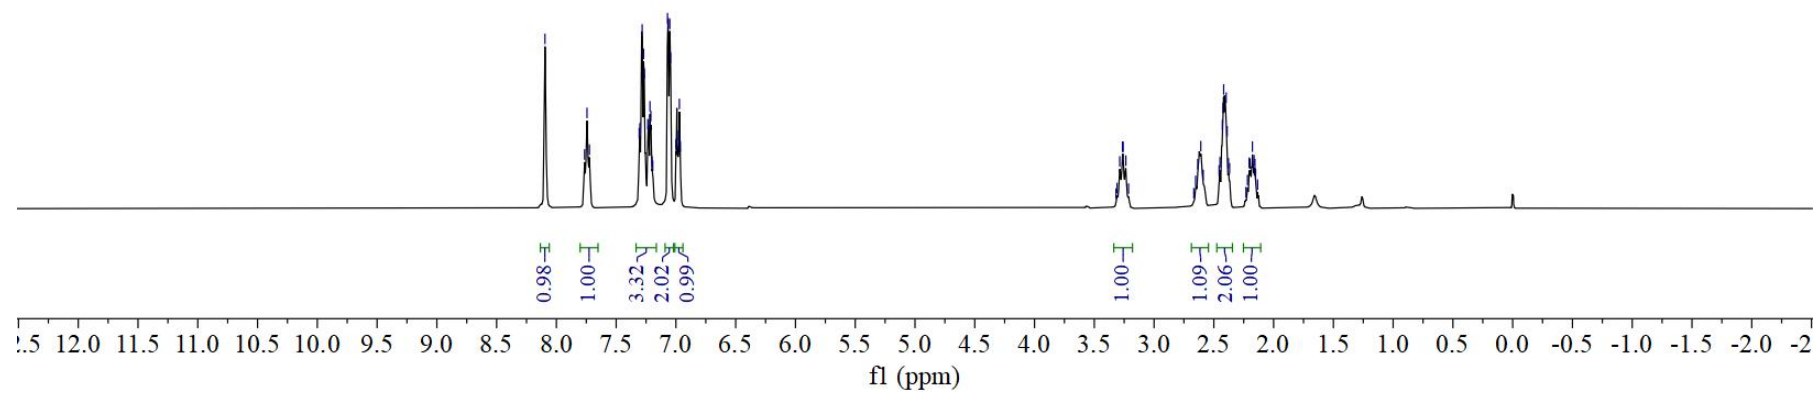

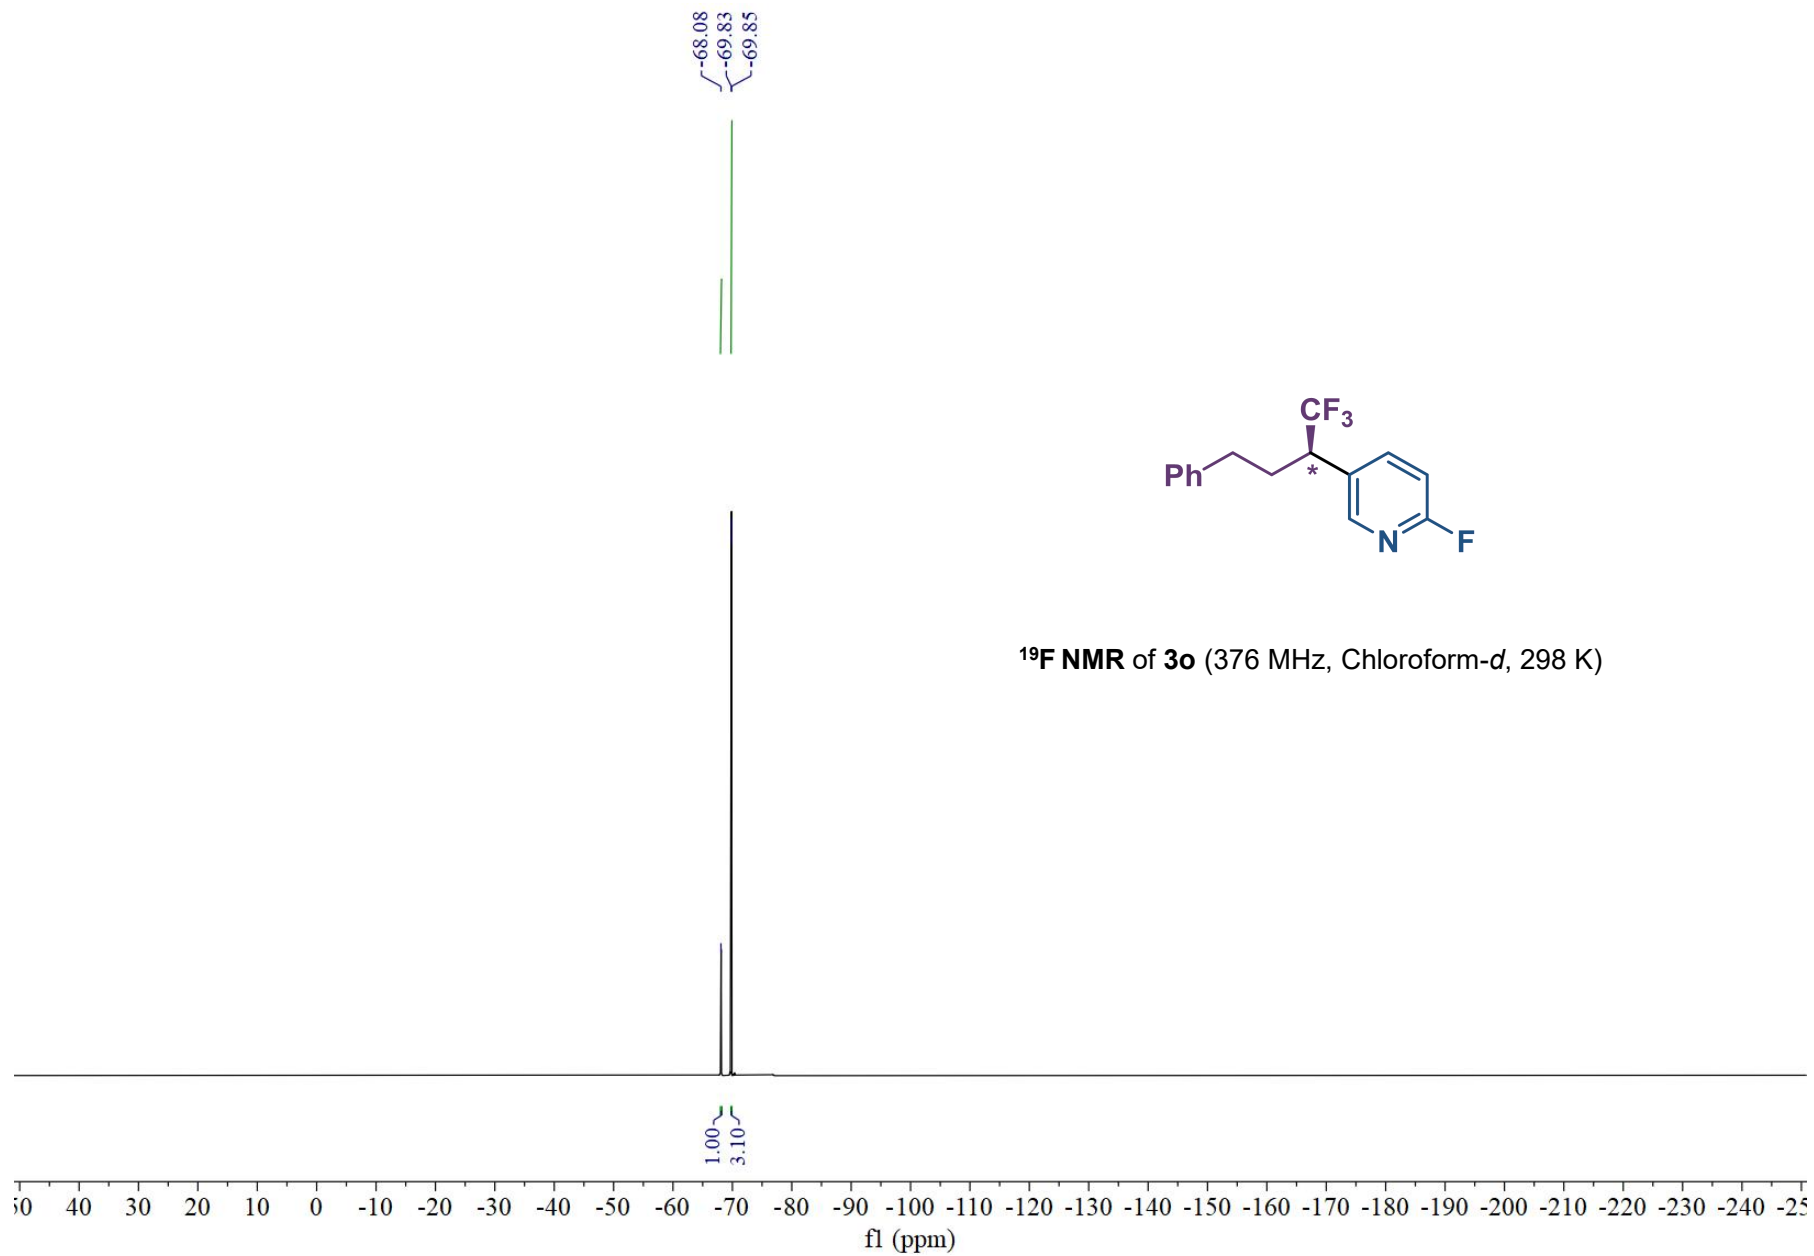

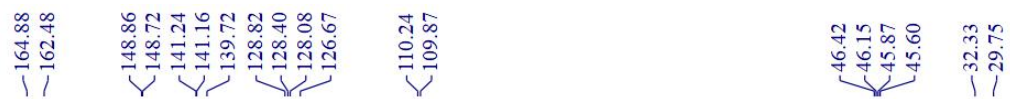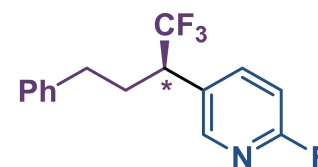

$^{13}\text{C}$  NMR of **3o** (101 MHz, Chloroform-*d*, 298 K)

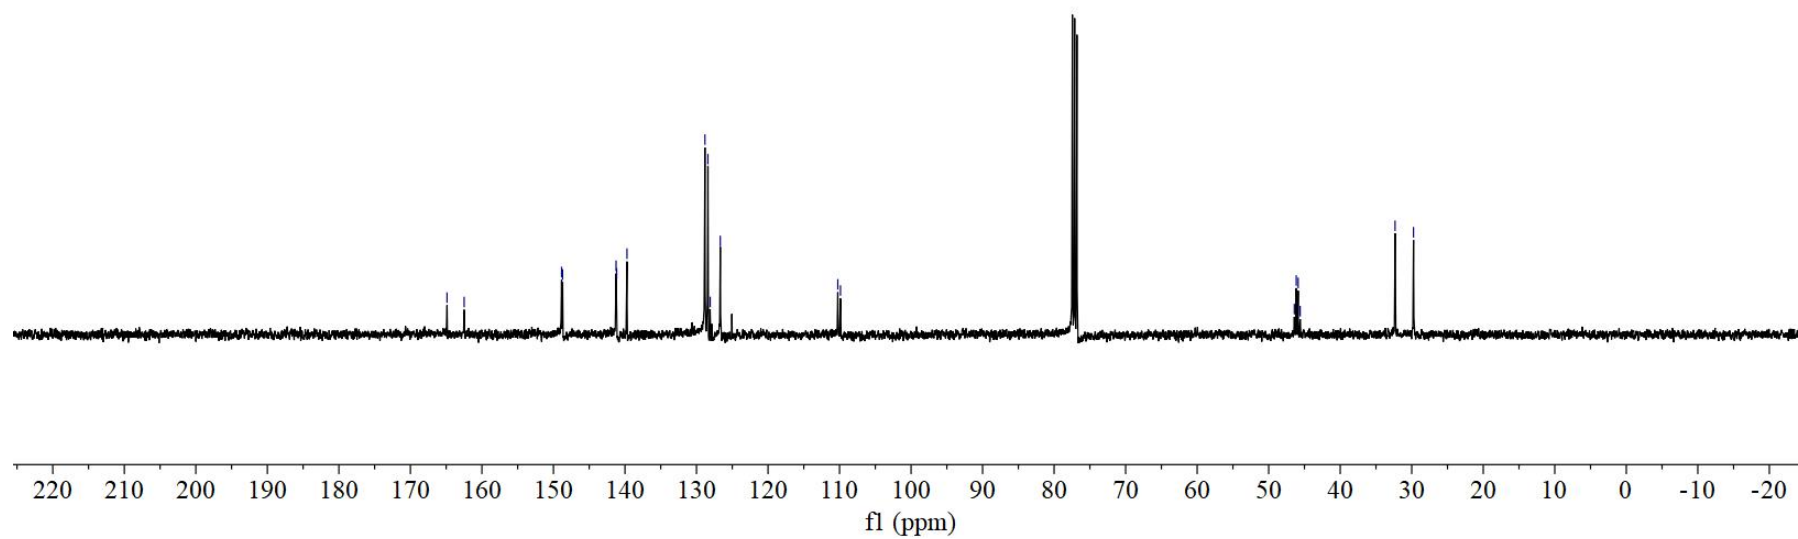

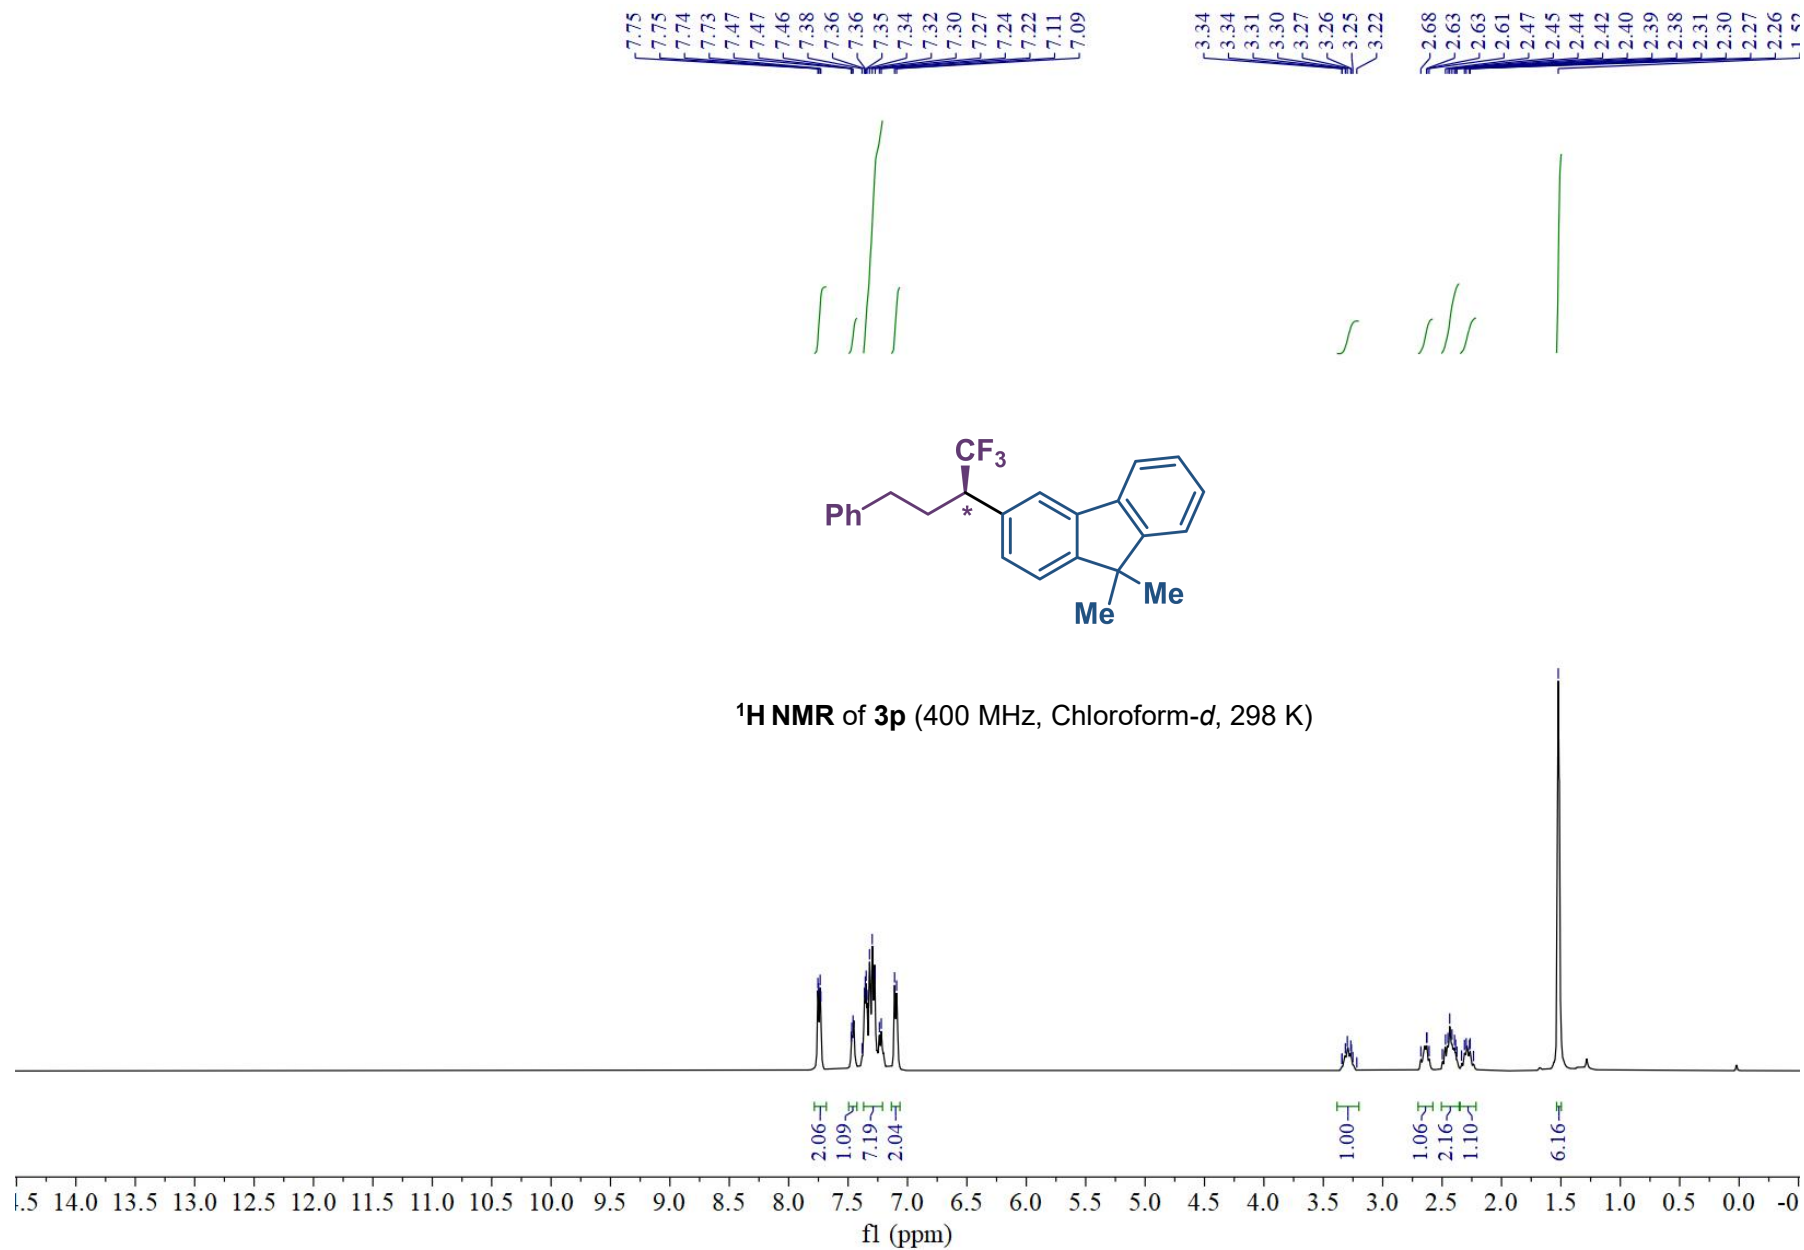

-69.41  
-69.44

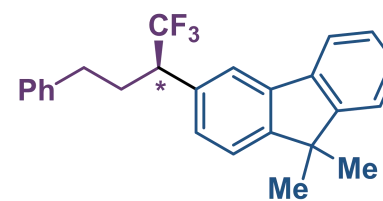

**<sup>19</sup>F NMR of 3p** (376 MHz, Chloroform-*d*, 298 K)

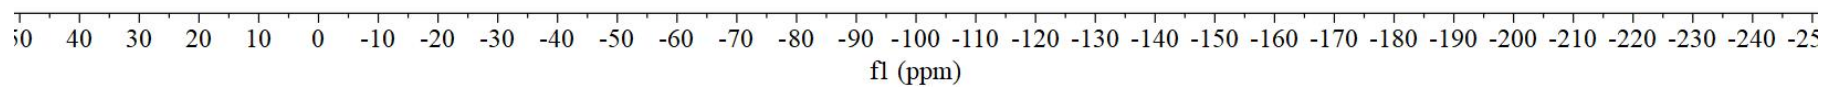

154.24  
153.87  
140.72  
139.49  
138.76  
133.44  
128.61  
128.59  
128.01  
127.59  
127.16  
126.35  
123.69  
122.75  
120.26  
120.21

49.76  
49.50  
49.23  
48.97  
46.97  
32.60  
30.35  
27.21

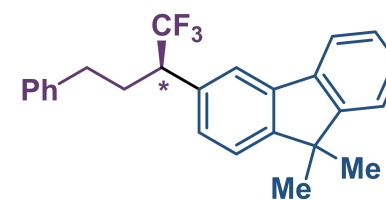

$^{13}\text{C}$  NMR of **3p** (101 MHz, Chloroform-*d*, 298 K)

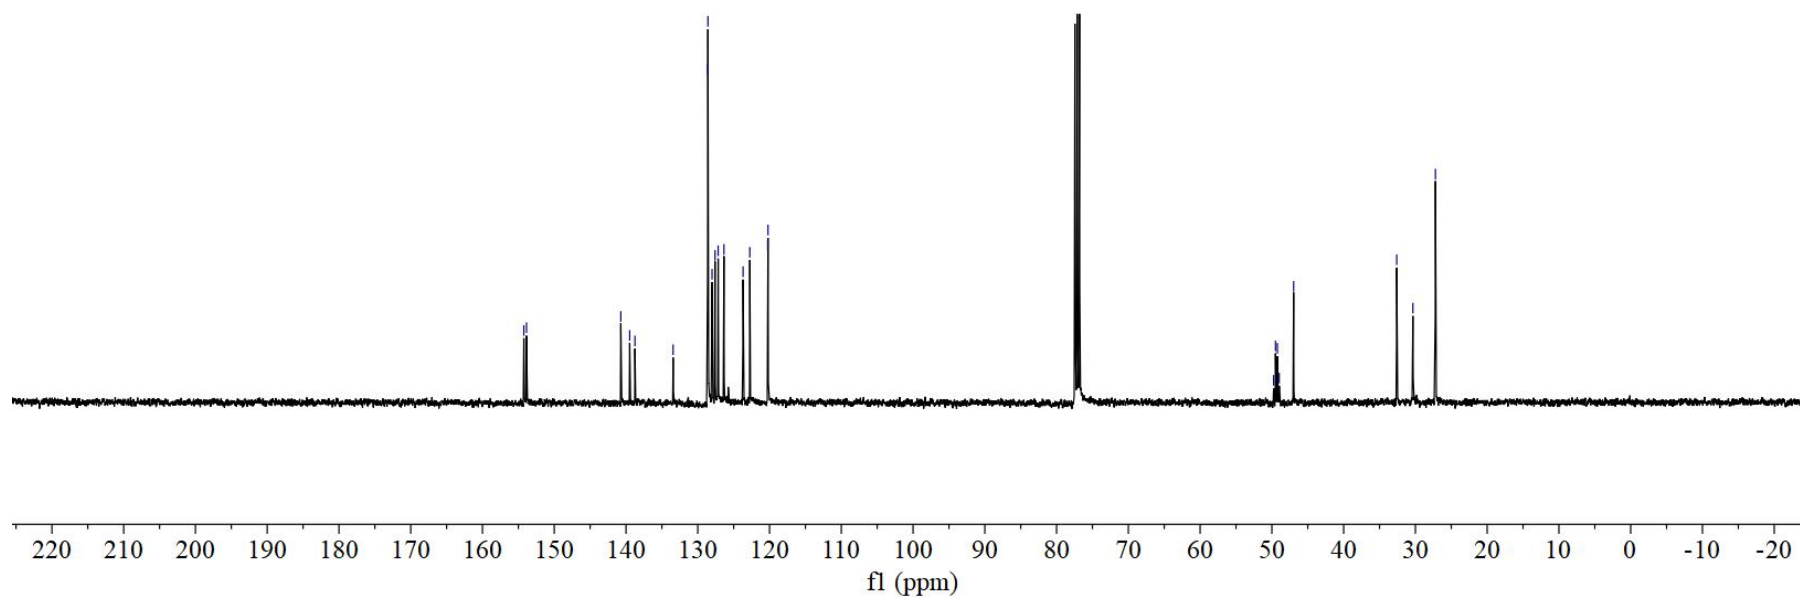

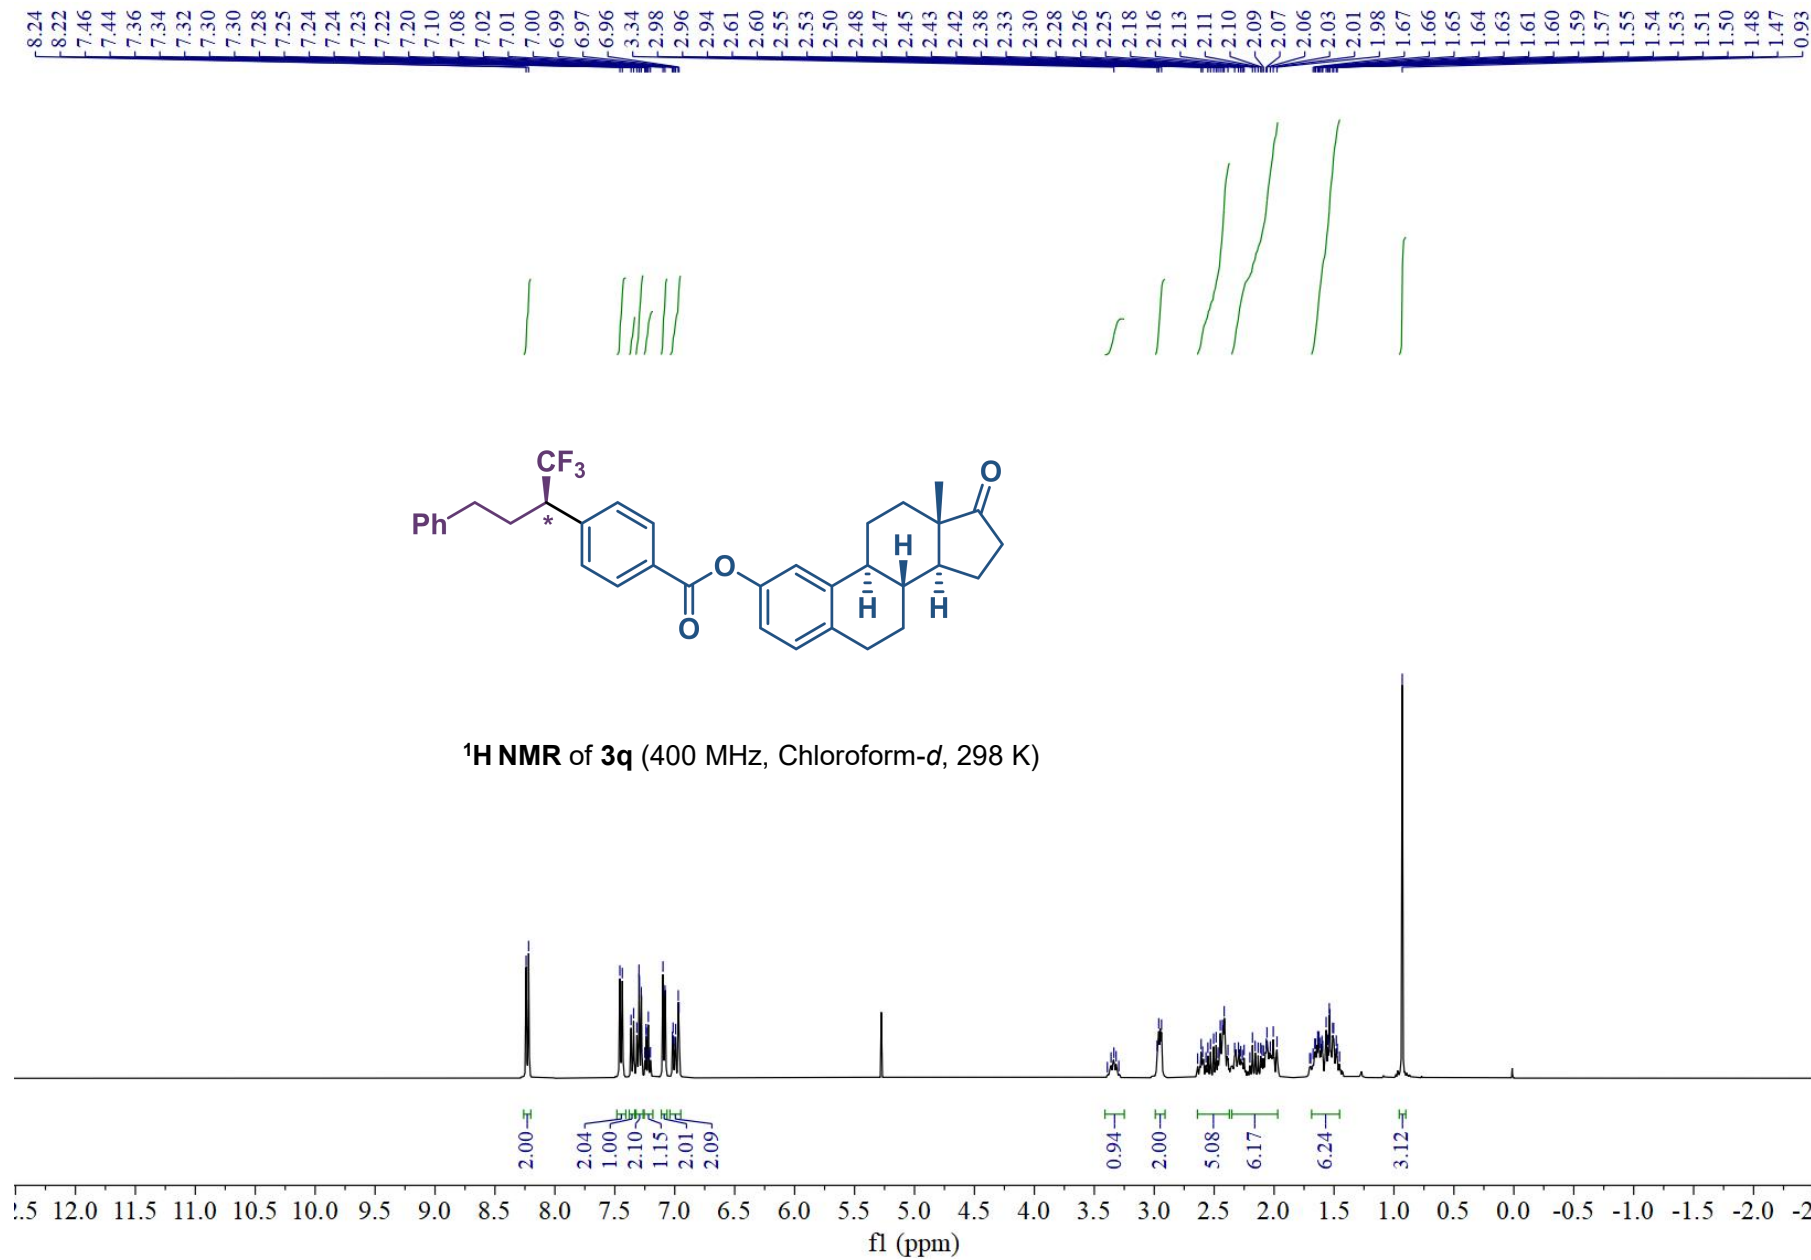



-69.14  
-69.17

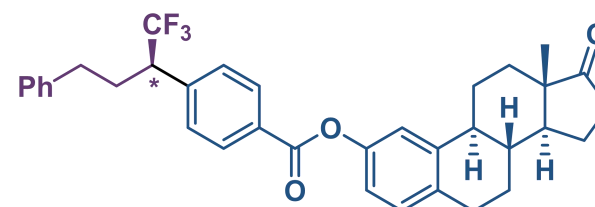

**<sup>19</sup>F NMR of 3q** (376 MHz, Chloroform-*d*, 298 K)

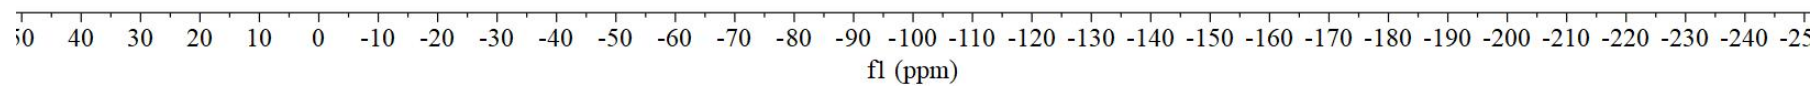

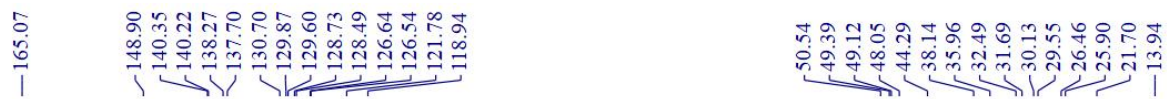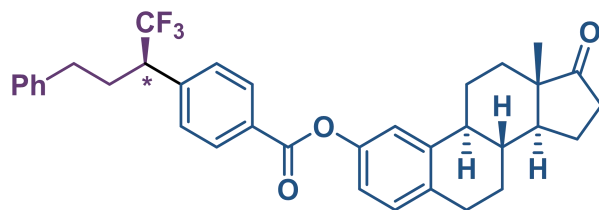

<sup>13</sup>C NMR of **3q** (101 MHz, Chloroform-*d*, 298 K)

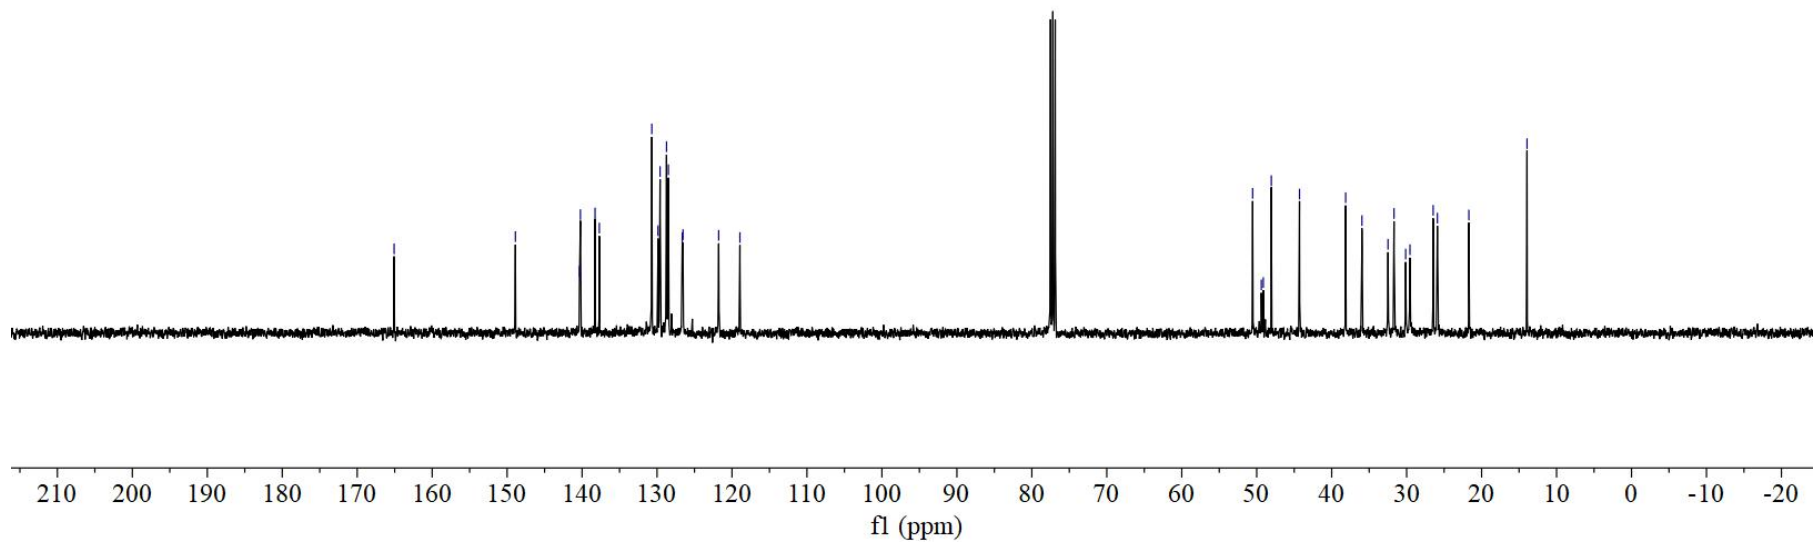

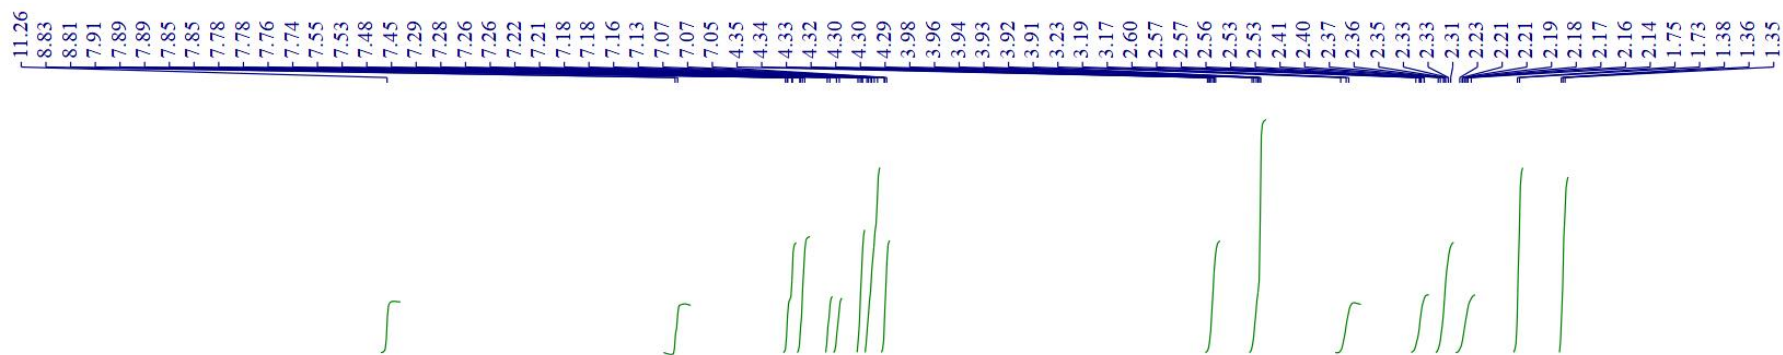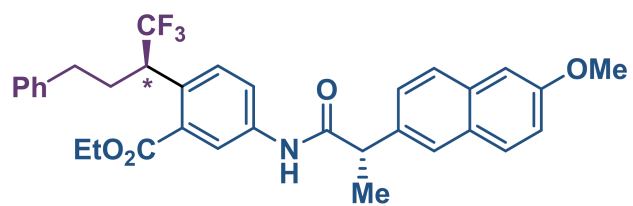

$^1\text{H}$  NMR of **3r** (400 MHz, Chloroform-*d*, 298 K)

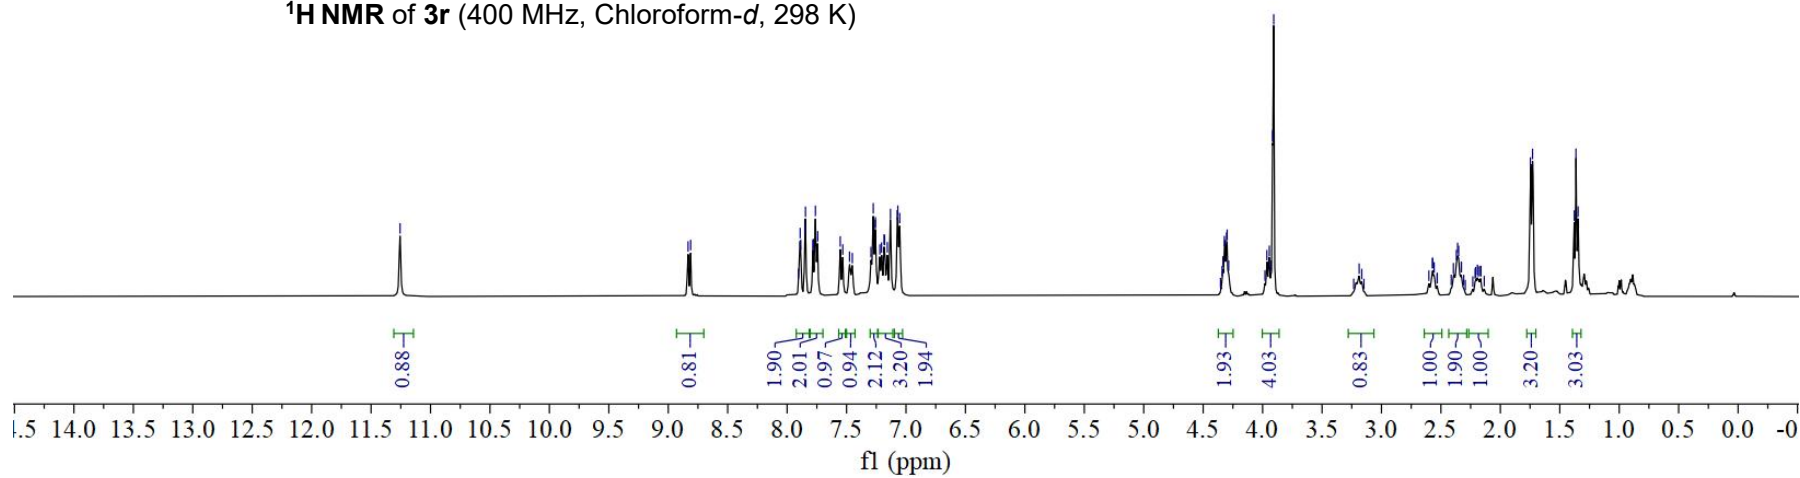

-69.71  
-69.73

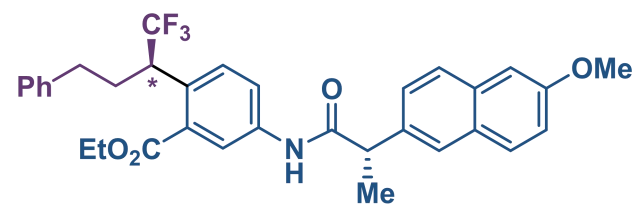

<sup>19</sup>F NMR of **3r** (376 MHz, Chloroform-*d*, 298 K)

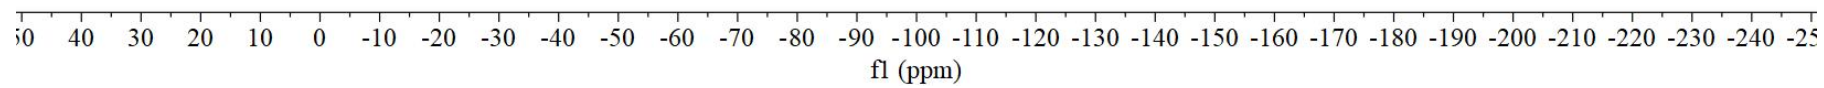

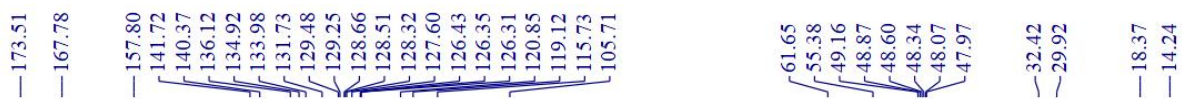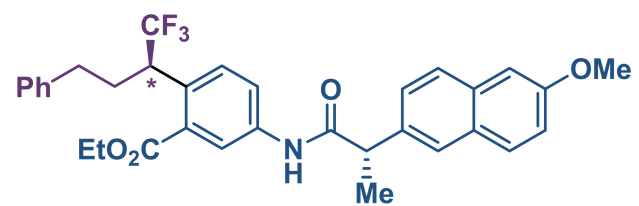

<sup>13</sup>C NMR of 3r (101 MHz, Chloroform-*d*, 298 K)

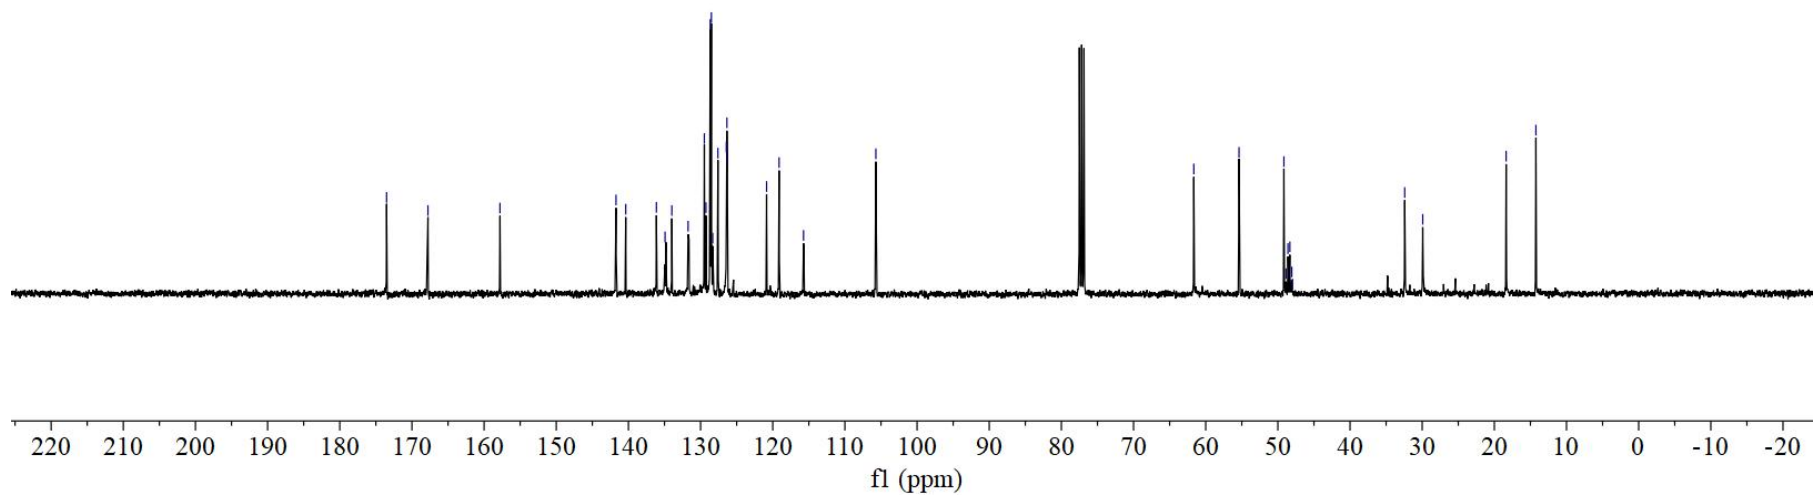

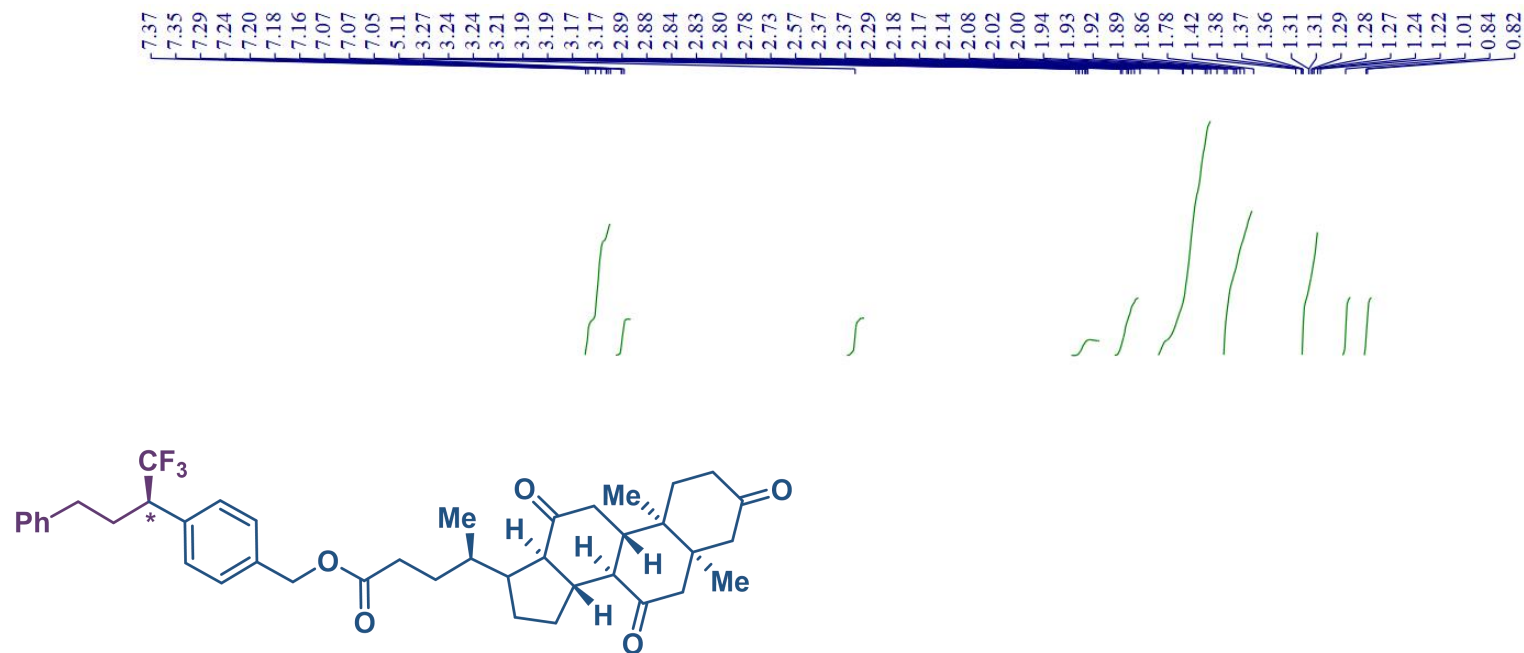

<sup>1</sup>H NMR of **3s** (400 MHz, Chloroform-*d*, 298 K)

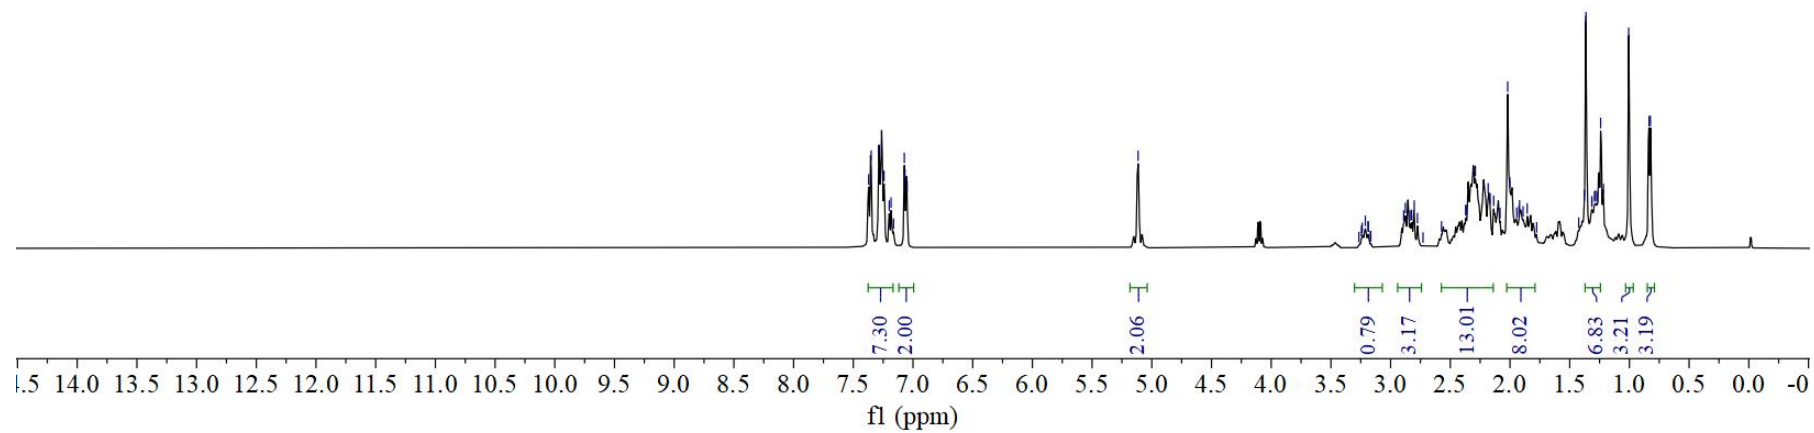

-69.48  
-69.50

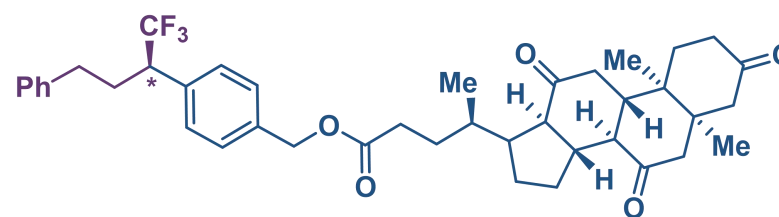

**<sup>19</sup>F NMR of 3s** (376 MHz, Chloroform-*d*, 298 K)



212.03  
209.16  
208.80

173.92

140.55  
136.31  
134.46  
129.55  
128.59  
126.32  
125.52

65.67  
60.48  
56.96  
51.84  
49.06  
46.91  
45.73  
45.60  
45.00  
42.87  
38.70  
36.56  
36.08  
35.54  
35.33  
34.02  
32.54  
31.62  
30.51  
30.17  
27.71  
25.18  
21.94  
18.70  
11.86

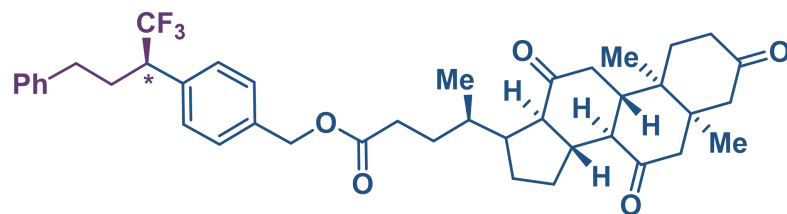

<sup>13</sup>C NMR of 3s (101 MHz, Chloroform-*d*, 298 K)

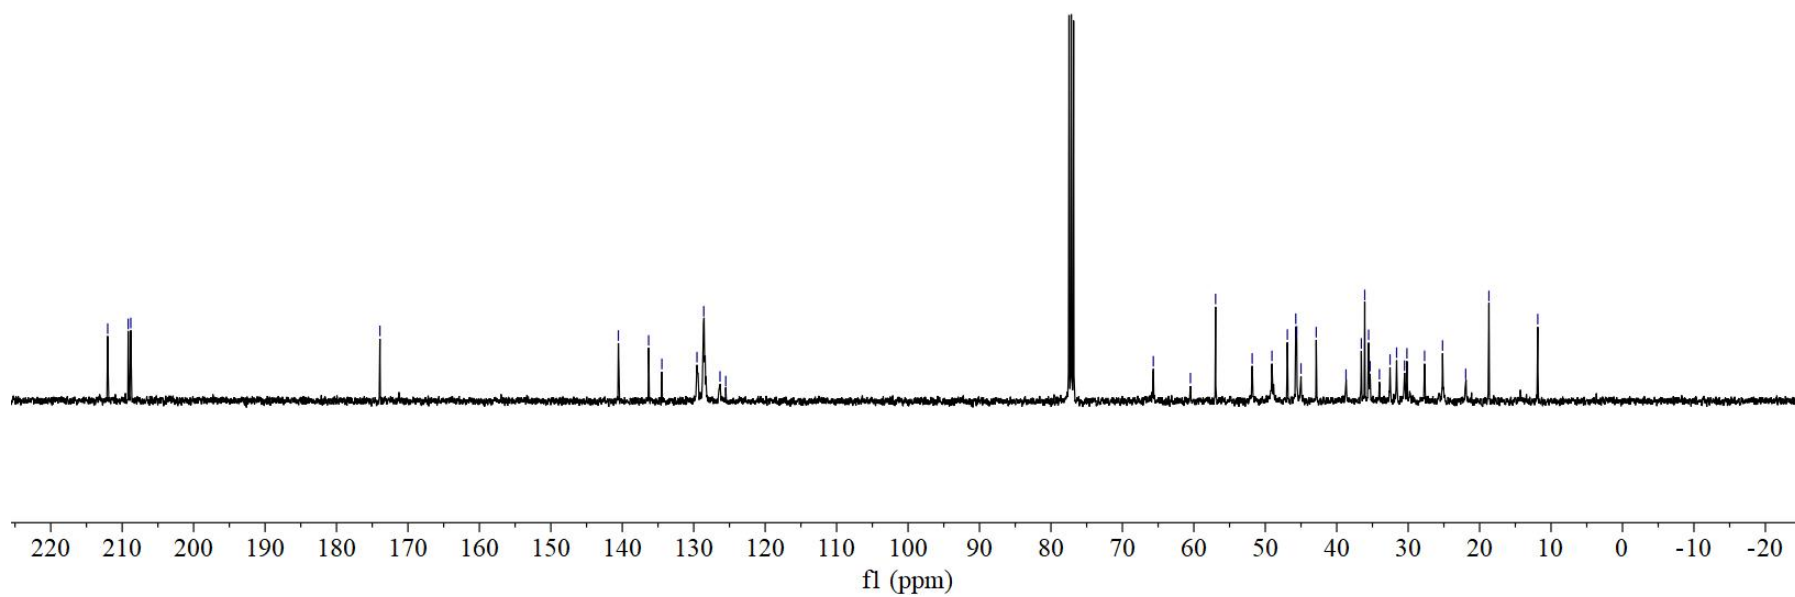



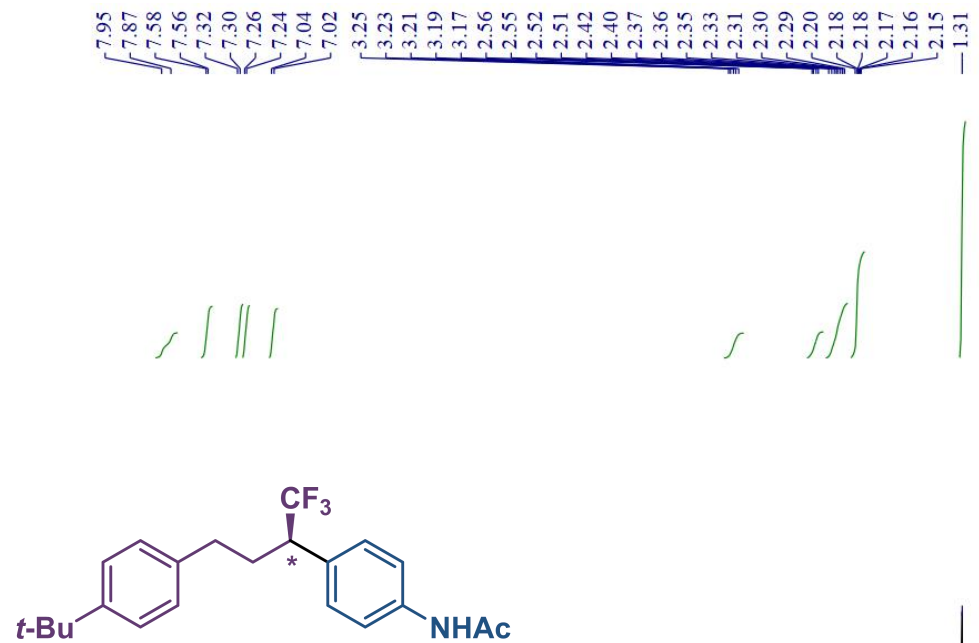

$^1\text{H}$  NMR of **3t** (400 MHz, Chloroform- $d$ , 298 K)

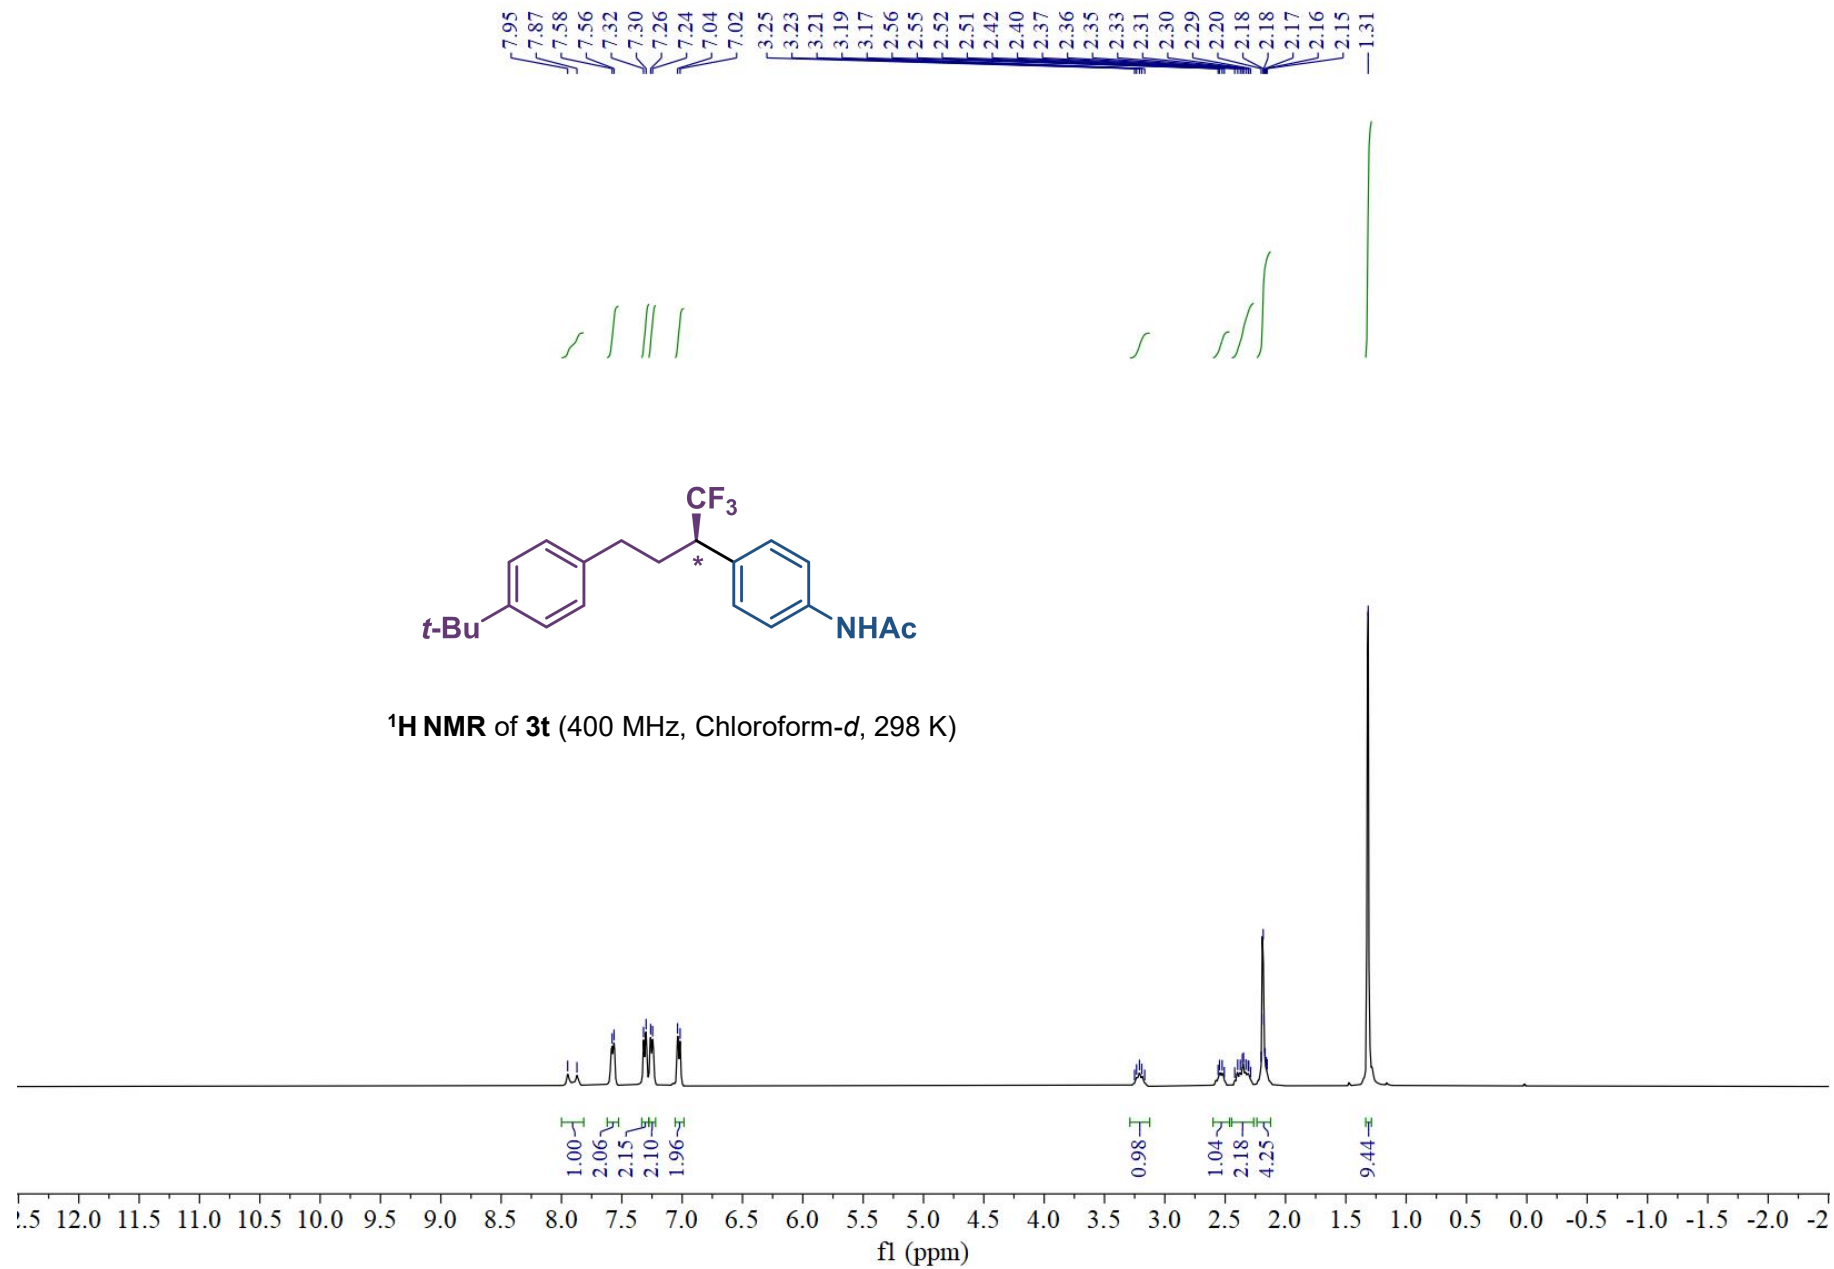

-69.64  
-69.66

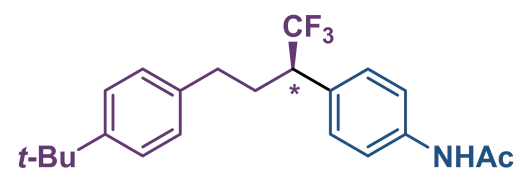

<sup>19</sup>F NMR of **3t** (376 MHz, Chloroform-*d*, 298 K)

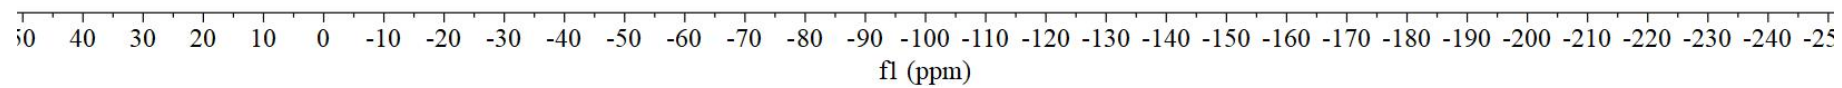

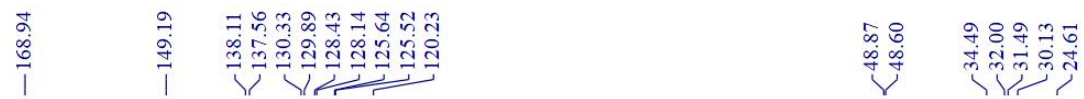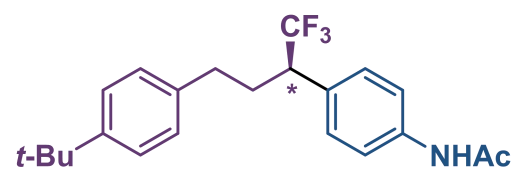

$^{13}\text{C}$  NMR of **3t** (101 MHz, Chloroform-*d*, 298 K)

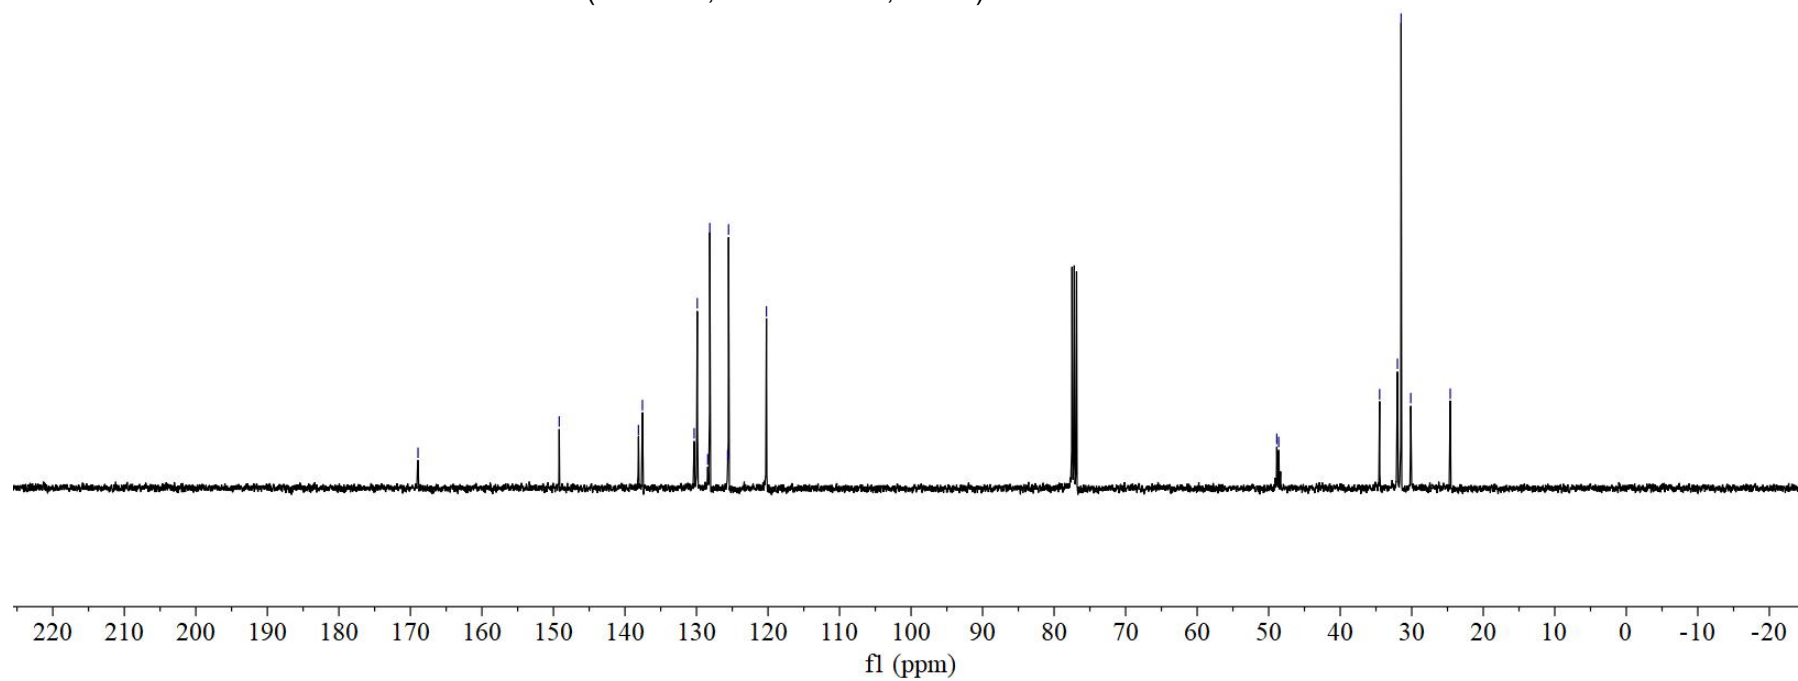

7.97  
7.95  
7.93  
7.86  
7.84  
7.82  
7.81  
7.79  
7.77  
7.75  
7.73  
7.71  
7.64  
7.61  
7.59  
3.35  
3.34  
3.34  
3.32  
3.30  
3.29  
3.27  
3.27  
3.25  
3.24  
3.04  
3.02  
3.01  
3.00  
2.99  
2.98  
2.96  
2.91  
2.89  
2.88  
2.85  
2.83  
2.51  
2.48  
2.47  
2.45  
2.45  
2.42  
2.42  
2.34  
2.32  
2.31  
2.30  
2.29  
2.28  
2.27  
2.25  
2.24  
2.16

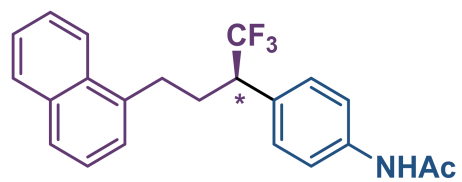

<sup>1</sup>H NMR of **3u** (400 MHz, Chloroform-*d*, 298 K)

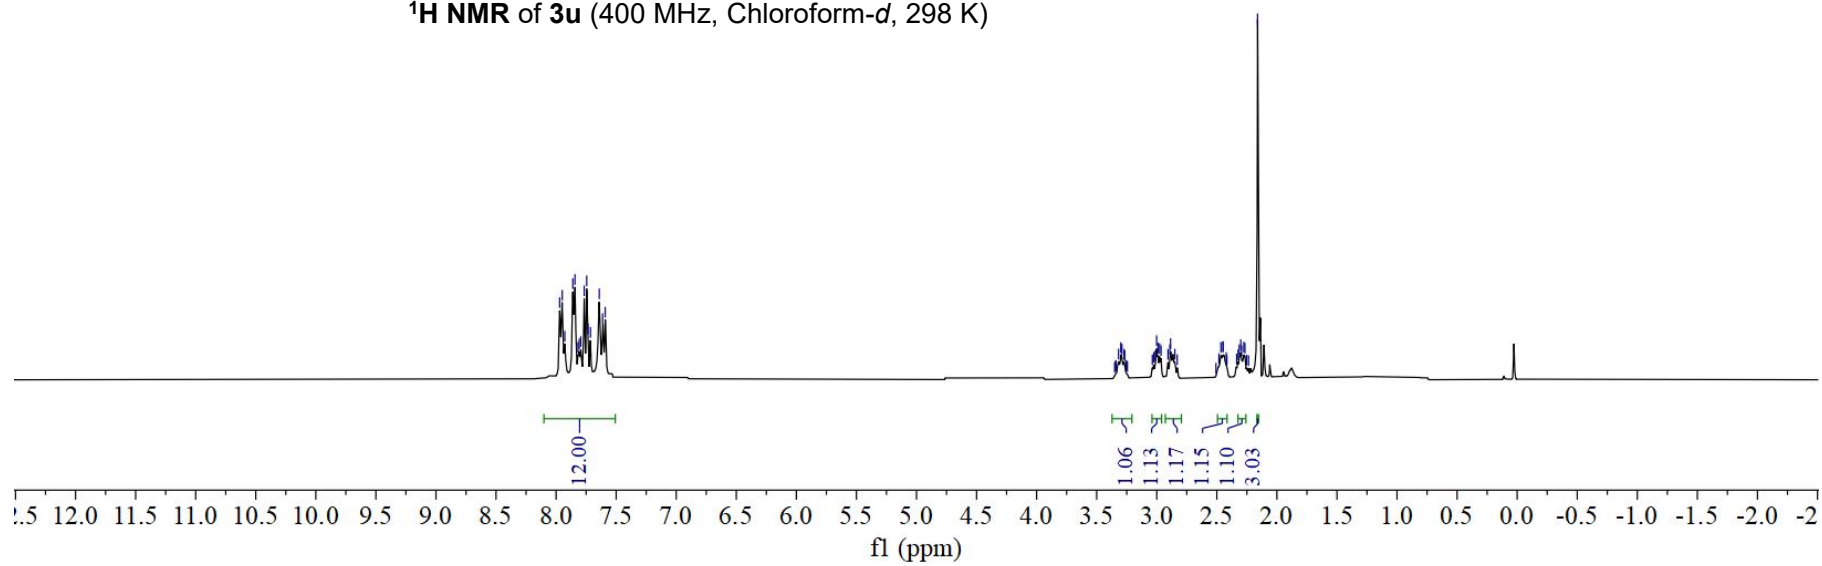

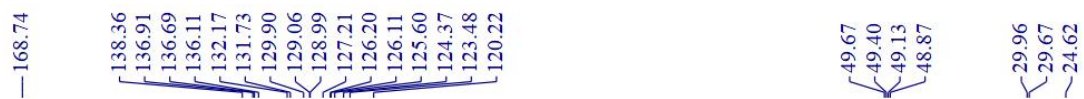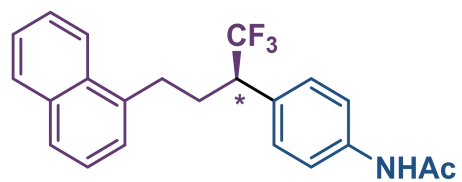

$^{13}\text{C}$  NMR of **3u** (101 MHz, Chloroform-*d*, 298 K)

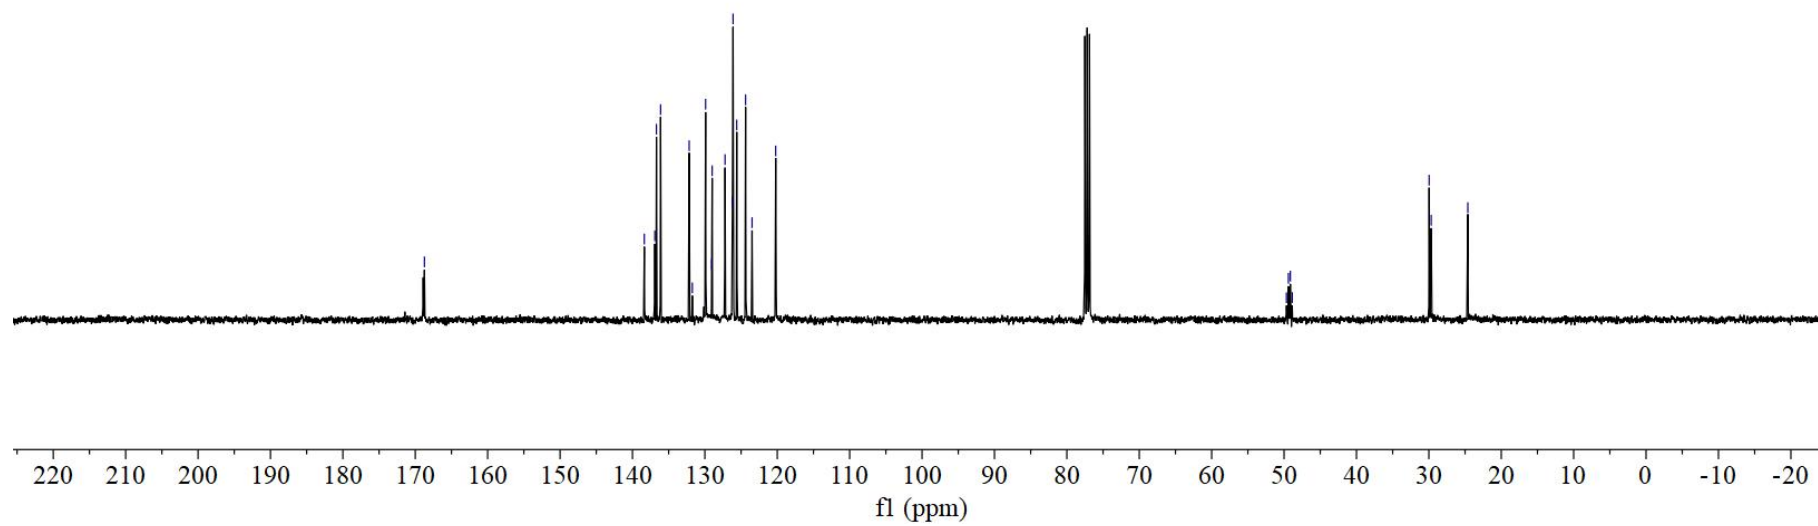

-69.59  
-69.61

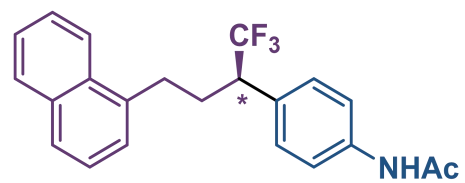

**<sup>19</sup>F NMR of 3u** (376 MHz, Chloroform-*d*, 298 K)

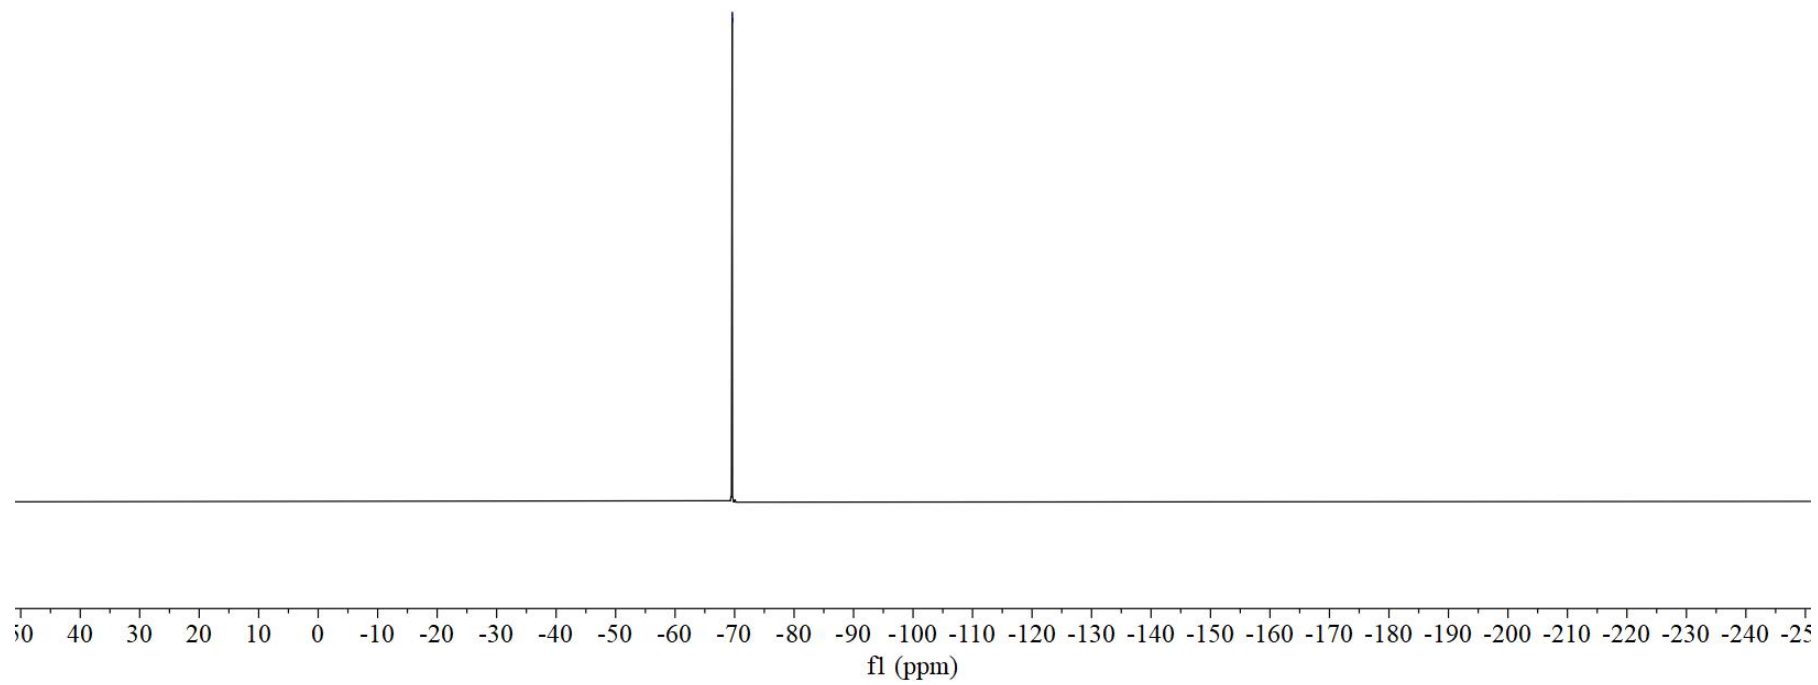

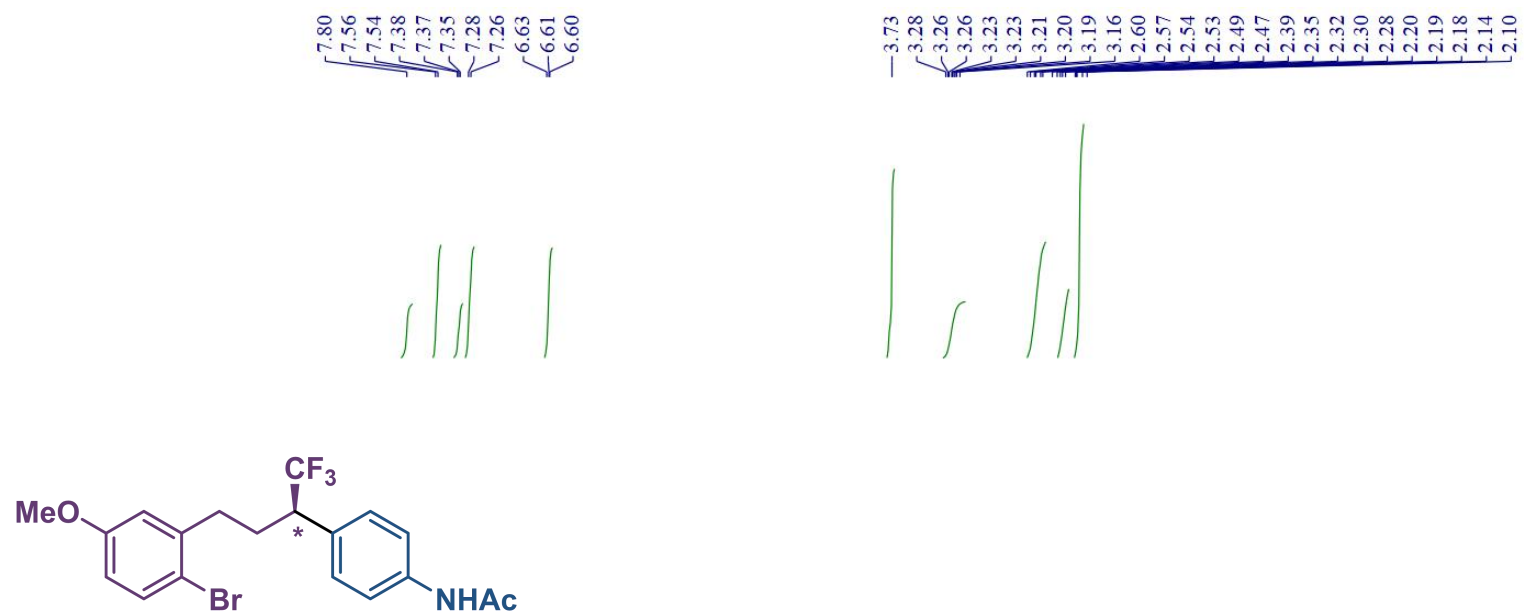

$^1\text{H}$  NMR of **3v** (400 MHz, Chloroform- $d$ , 298 K)

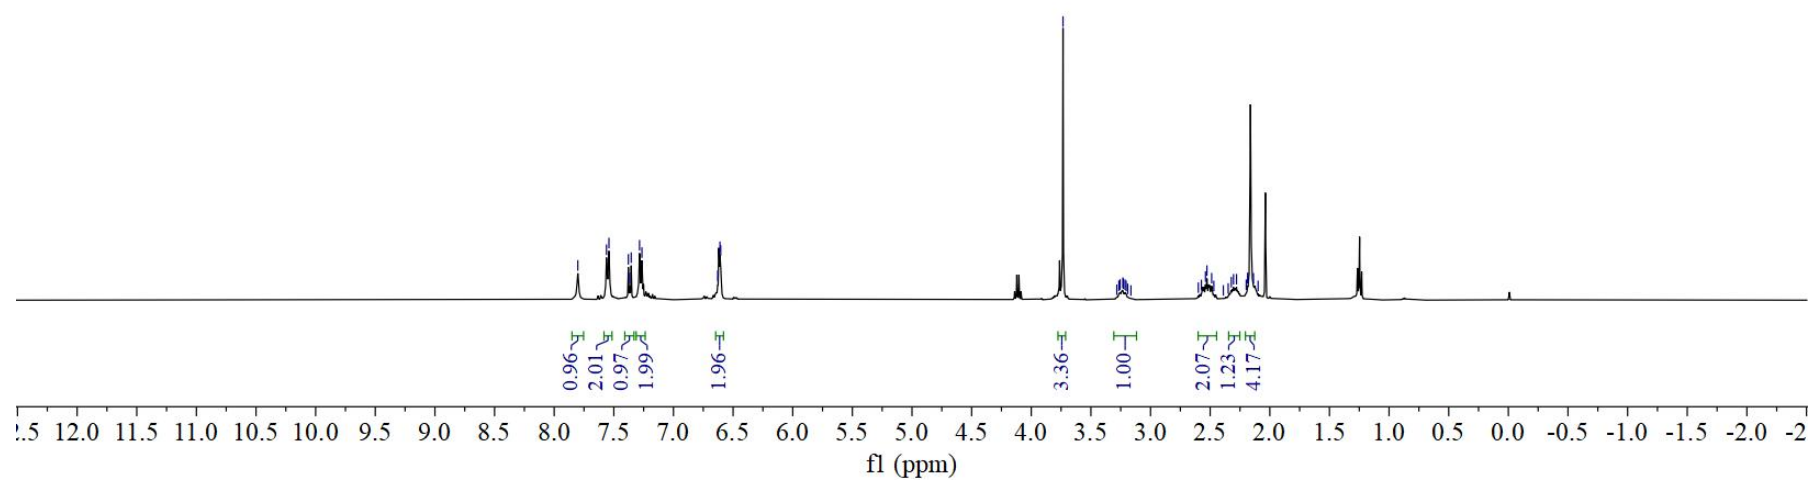

-69.76  
-69.79

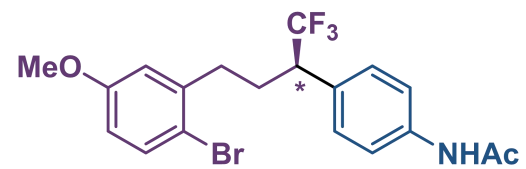

<sup>19</sup>F NMR of **3v** (376 MHz, Chloroform-*d*, 298 K)

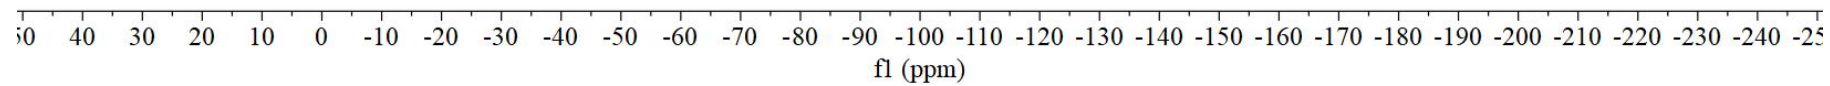



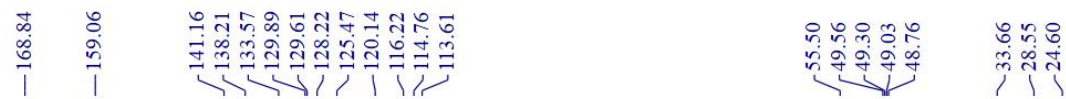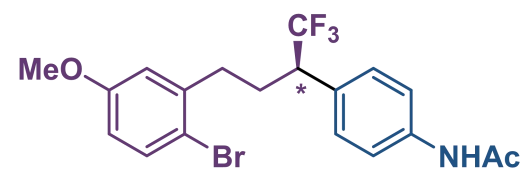

<sup>13</sup>C NMR of **3v** (101 MHz, Chloroform-*d*, 298 K)

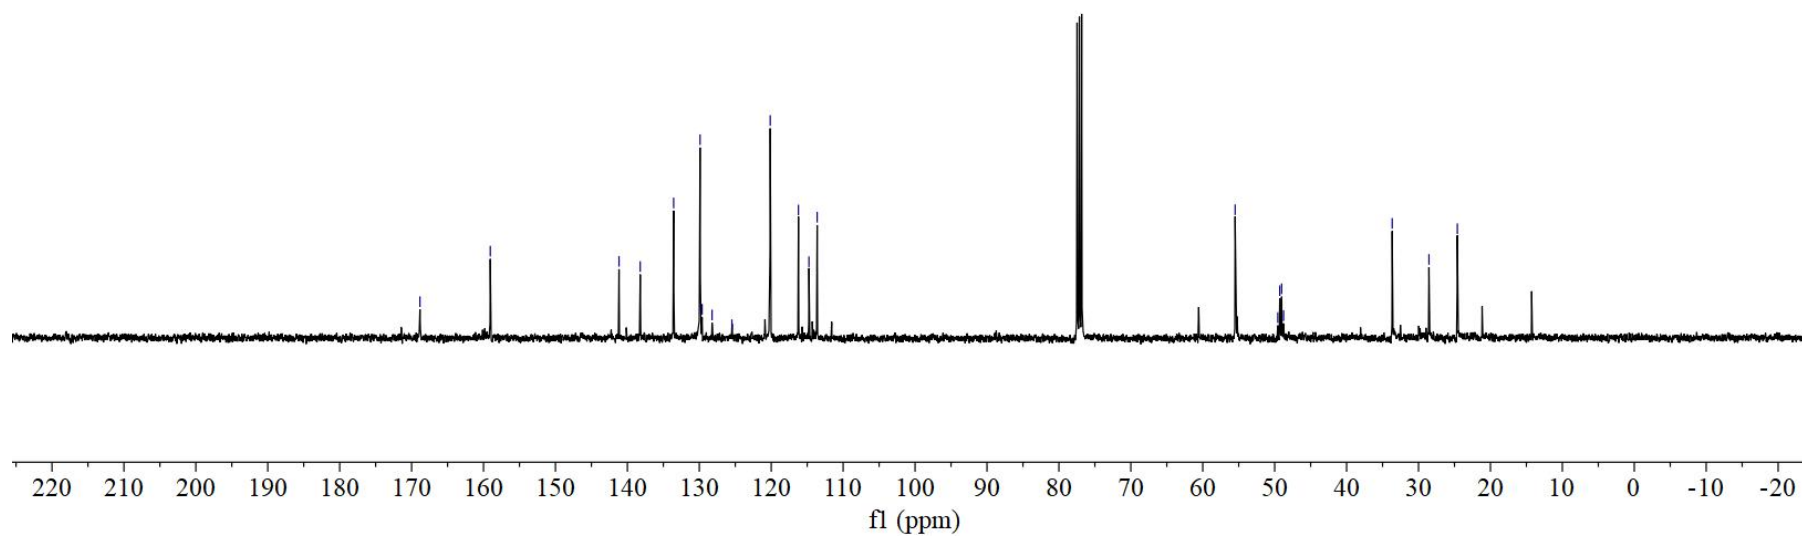

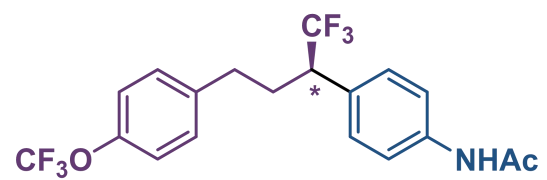

$^1\text{H NMR}$  of **3w** (400 MHz, Chloroform-*d*, 298 K)

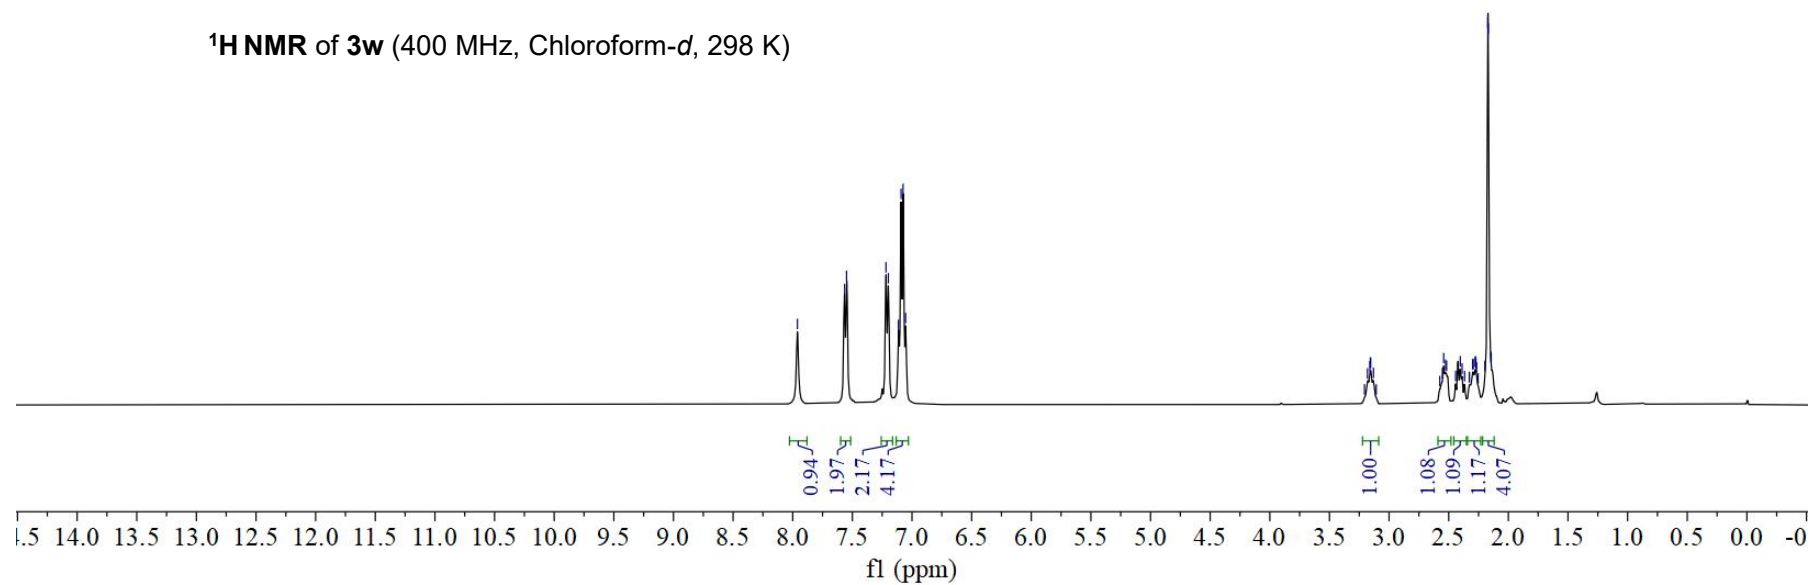

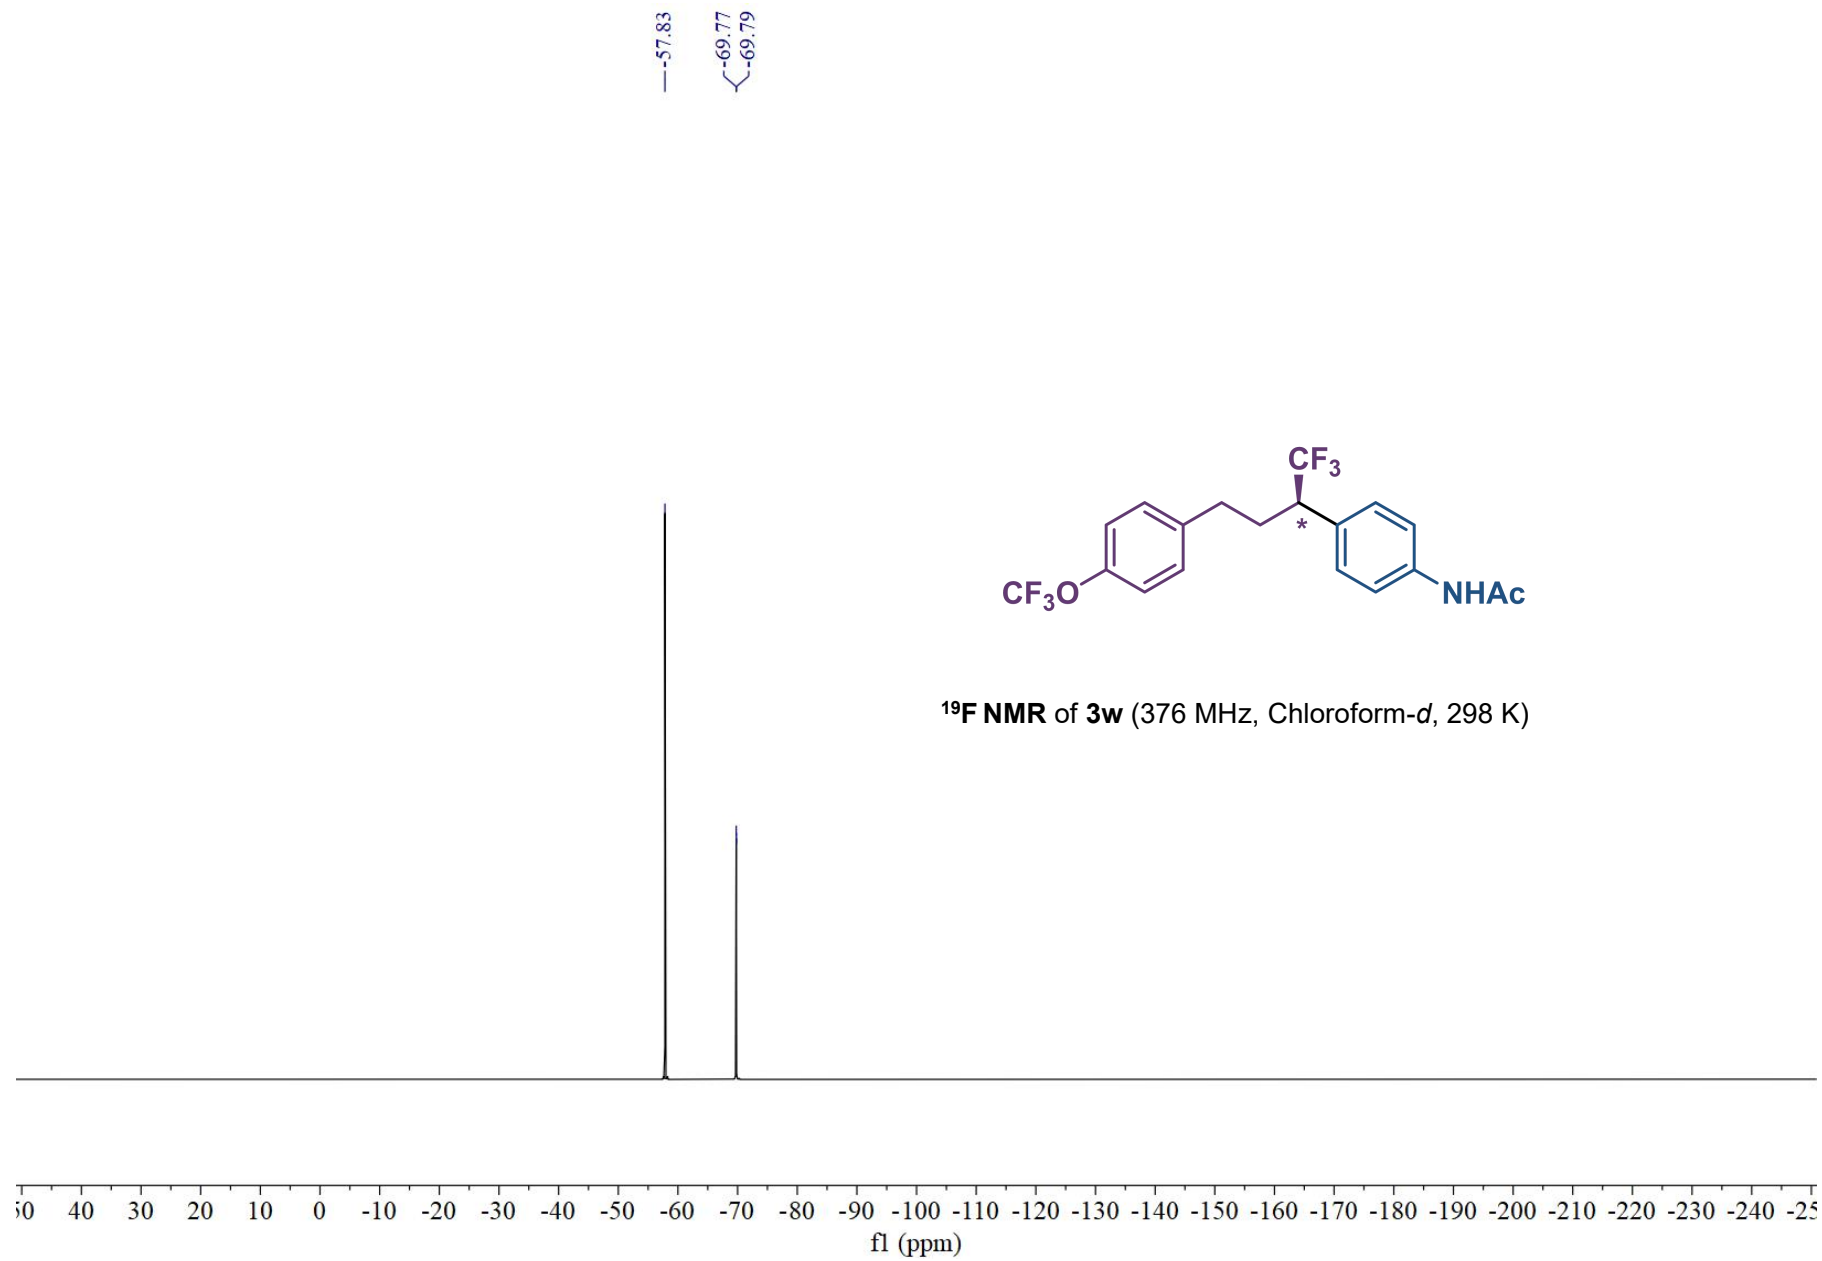

—169.02  
—147.76  
139.36  
138.24  
129.96  
129.76  
129.71  
128.26  
125.47  
121.86  
121.15  
120.31  
119.31

48.83  
48.56

31.89  
30.02  
24.52

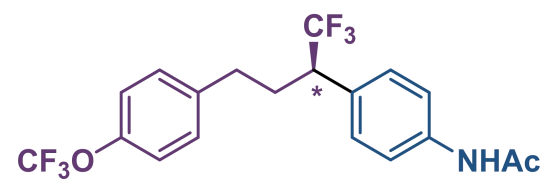

<sup>13</sup>C NMR of **3w** (101 MHz, Chloroform-*d*, 298 K)

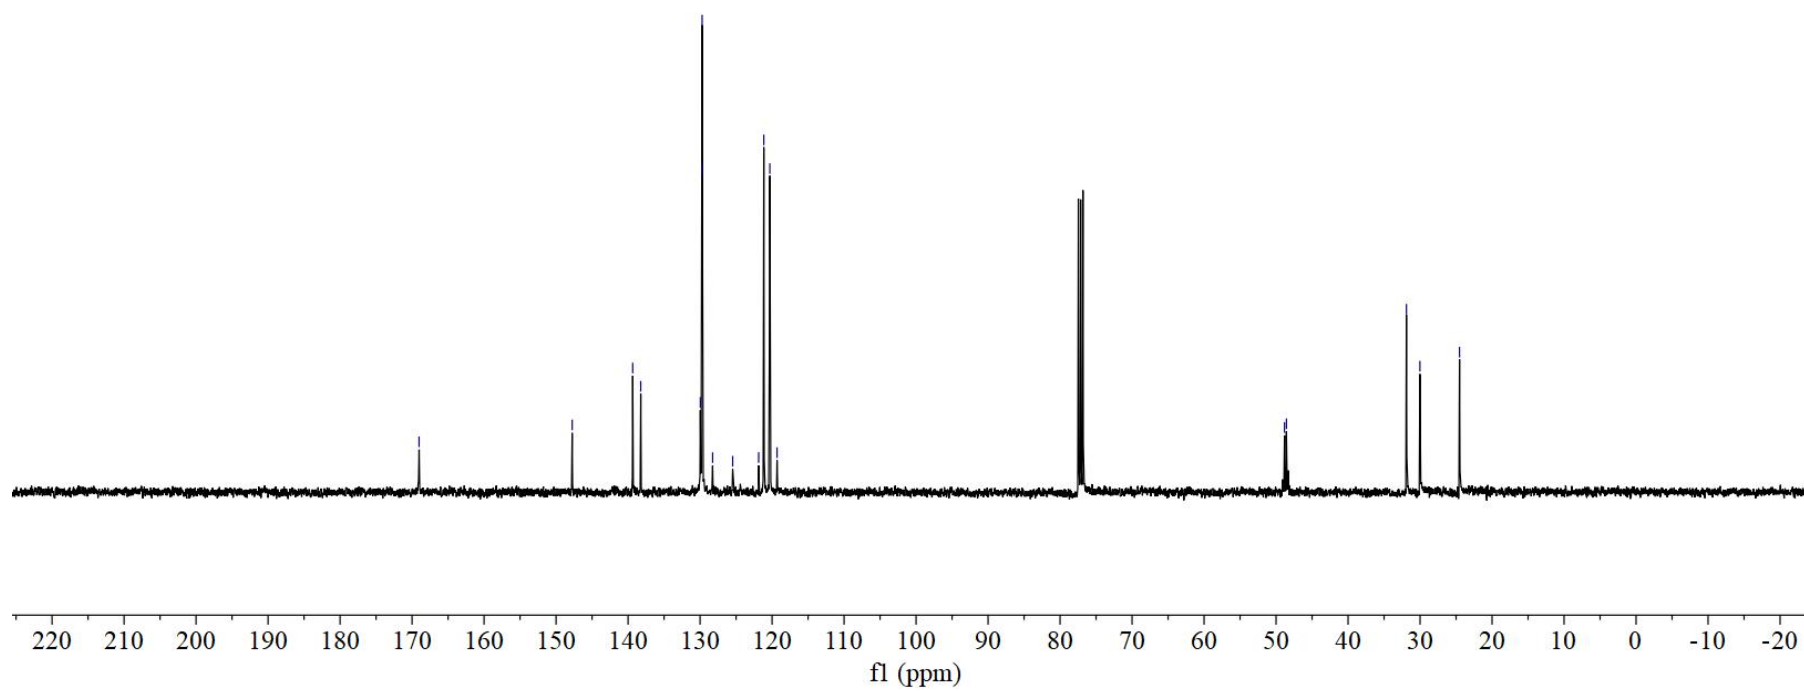

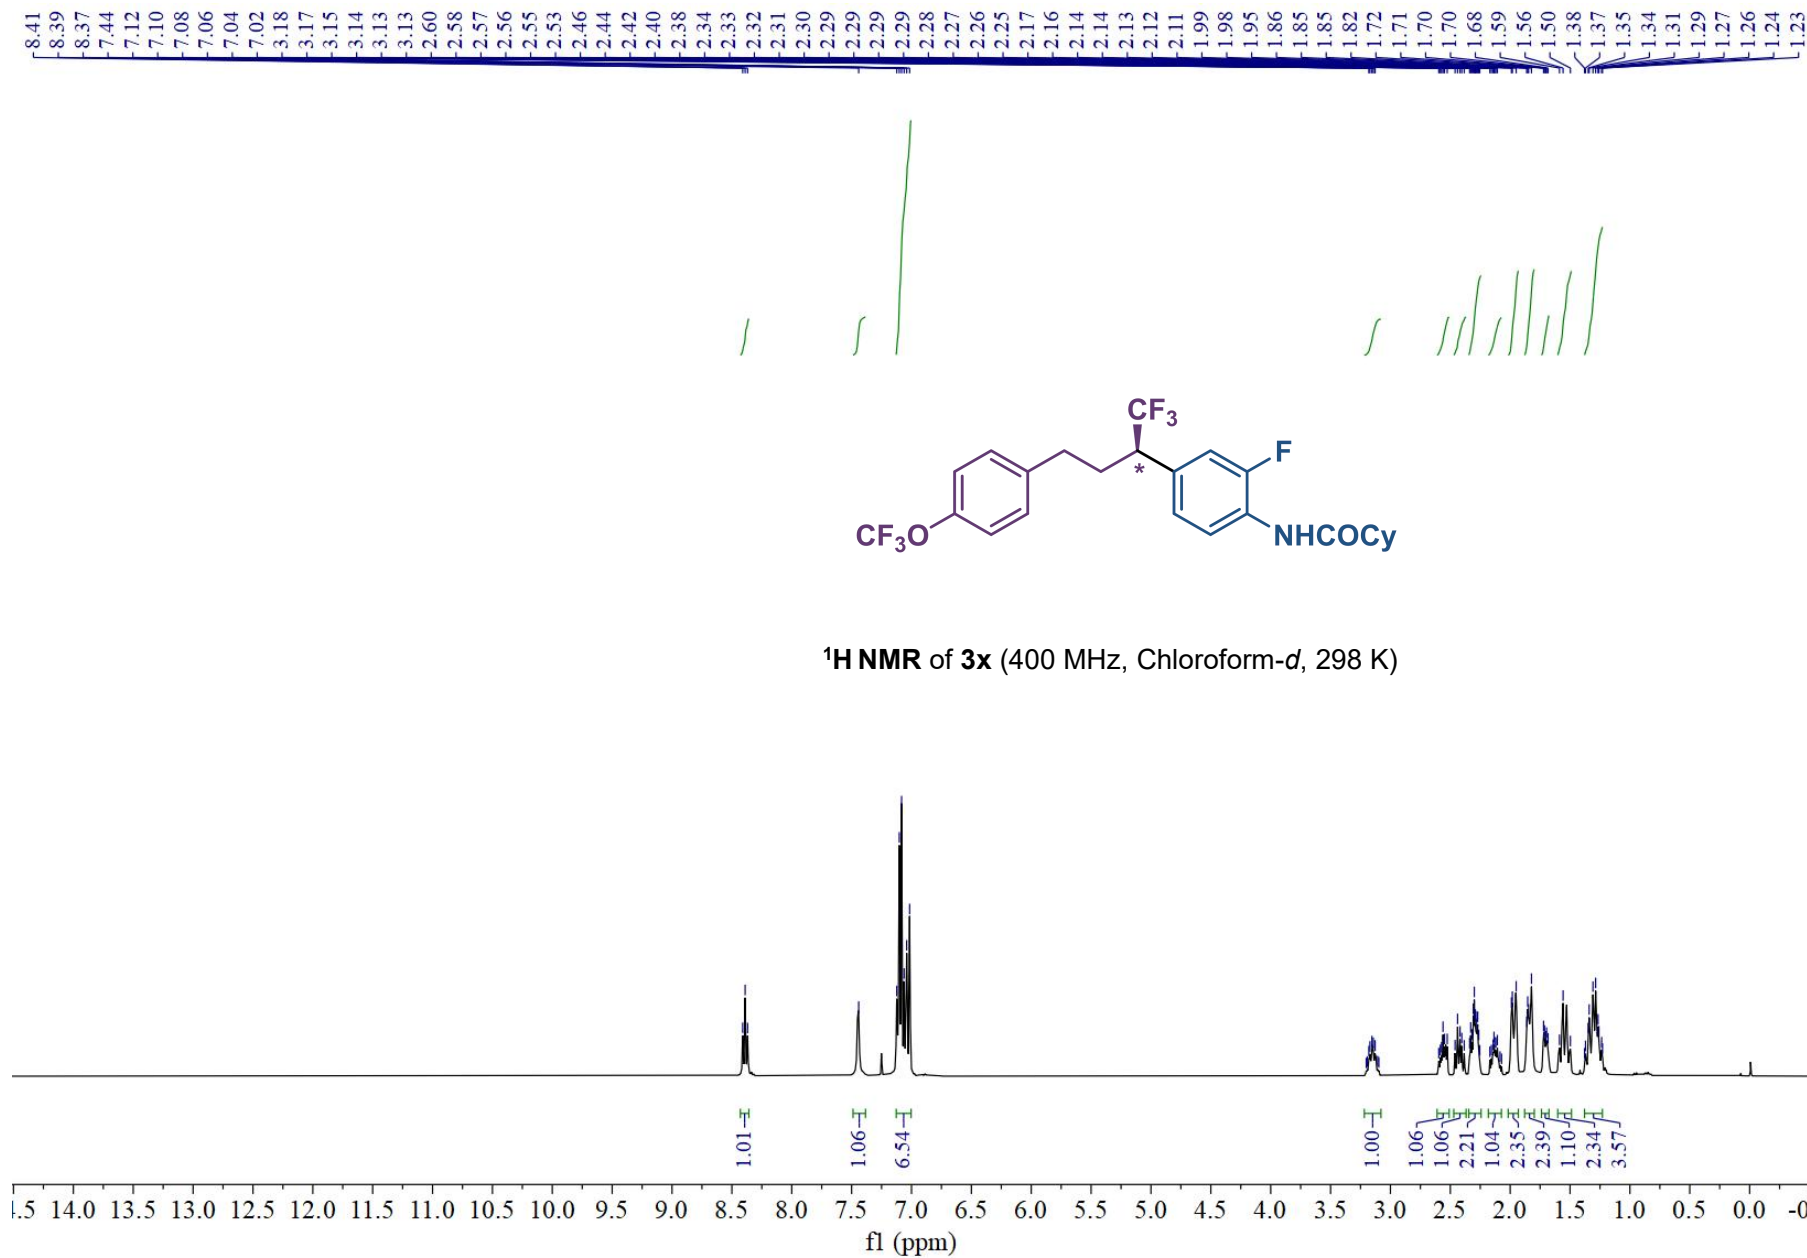

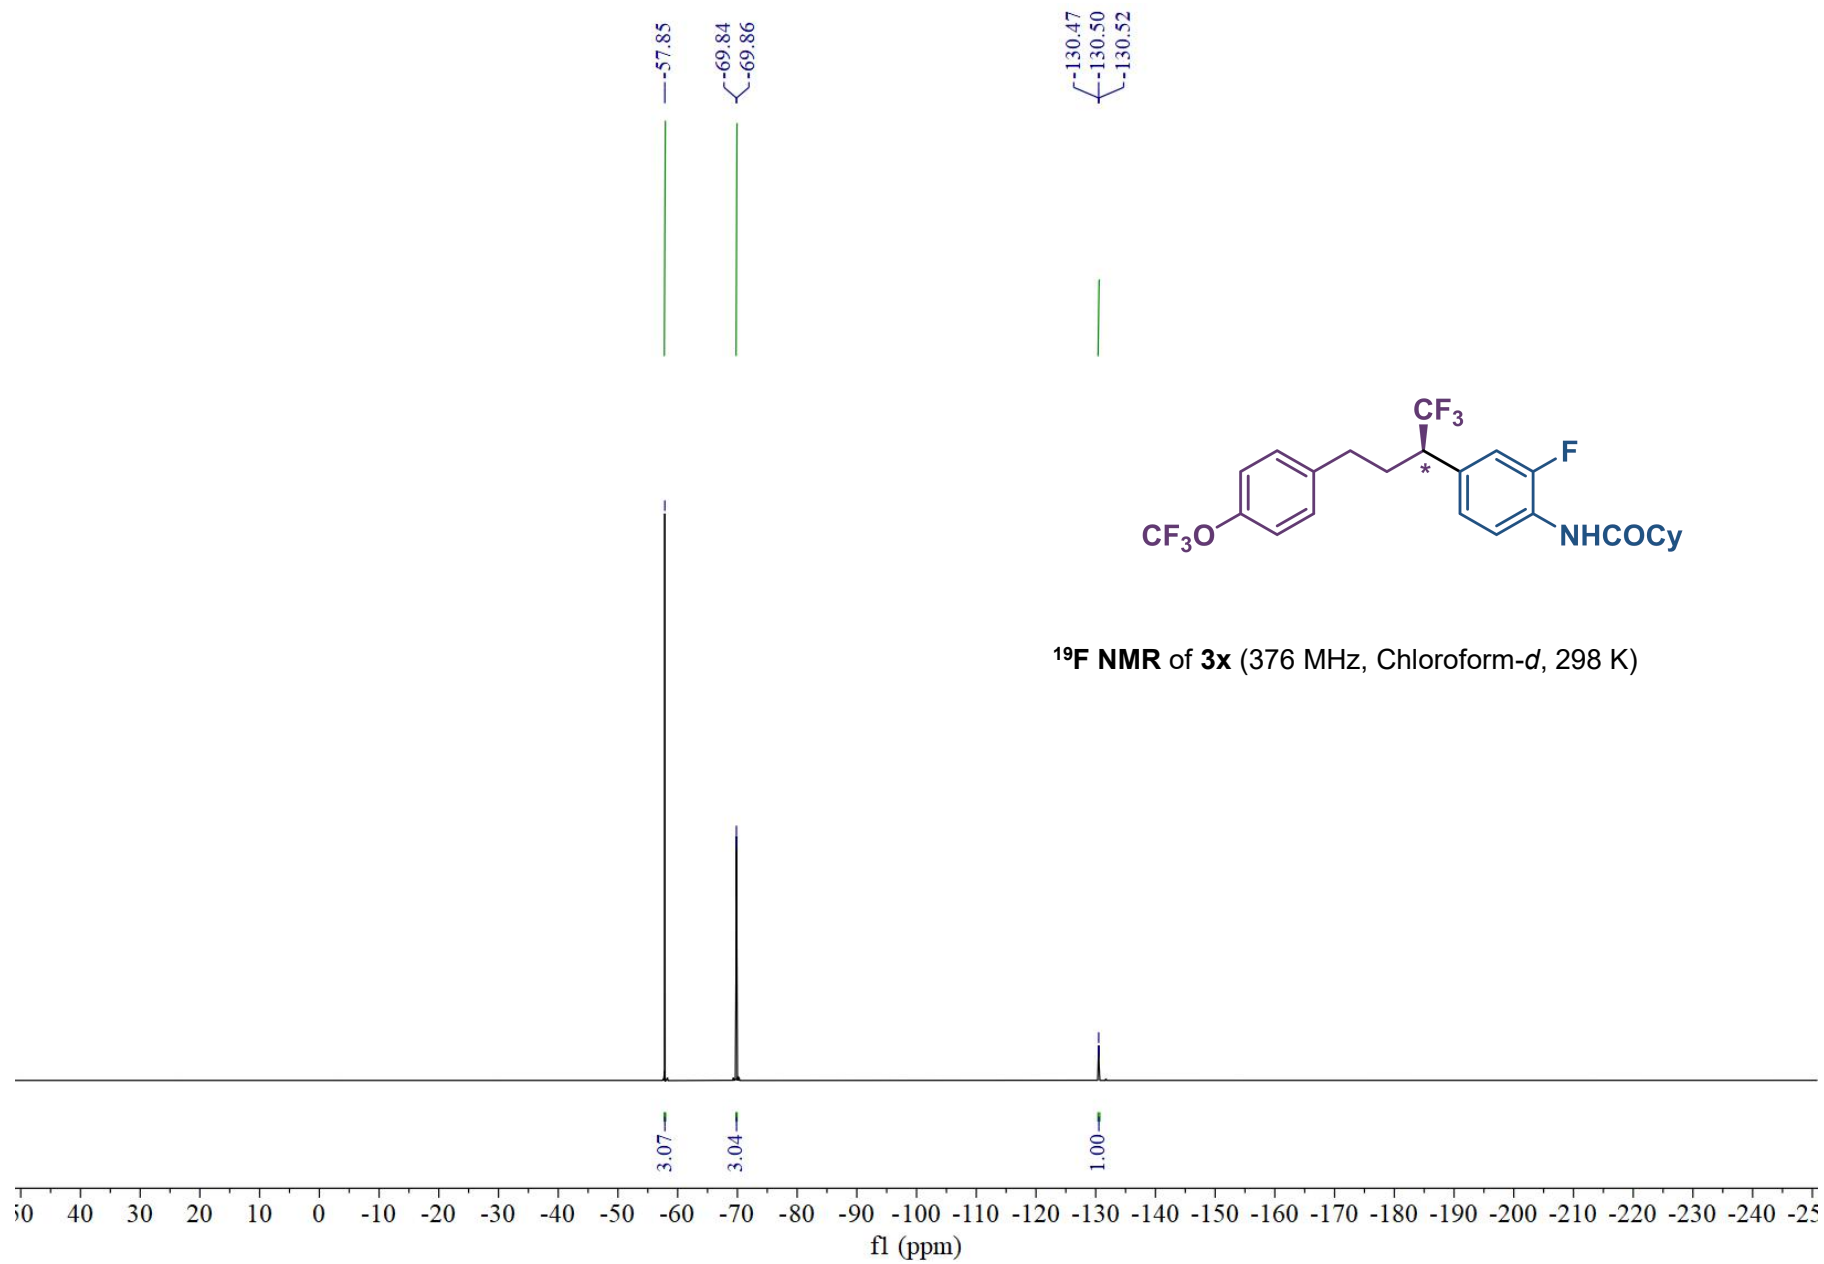

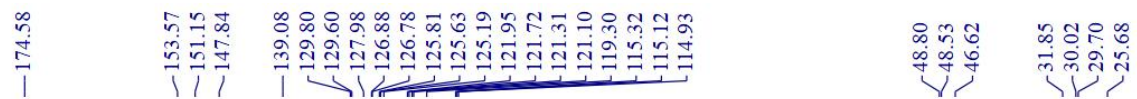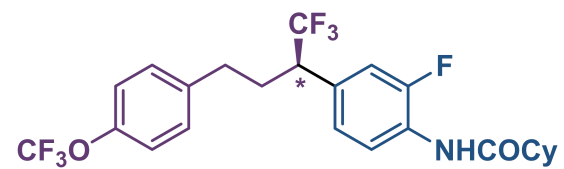

$^{13}\text{C}$  NMR of **3x** (101 MHz, Chloroform-*d*, 298 K)

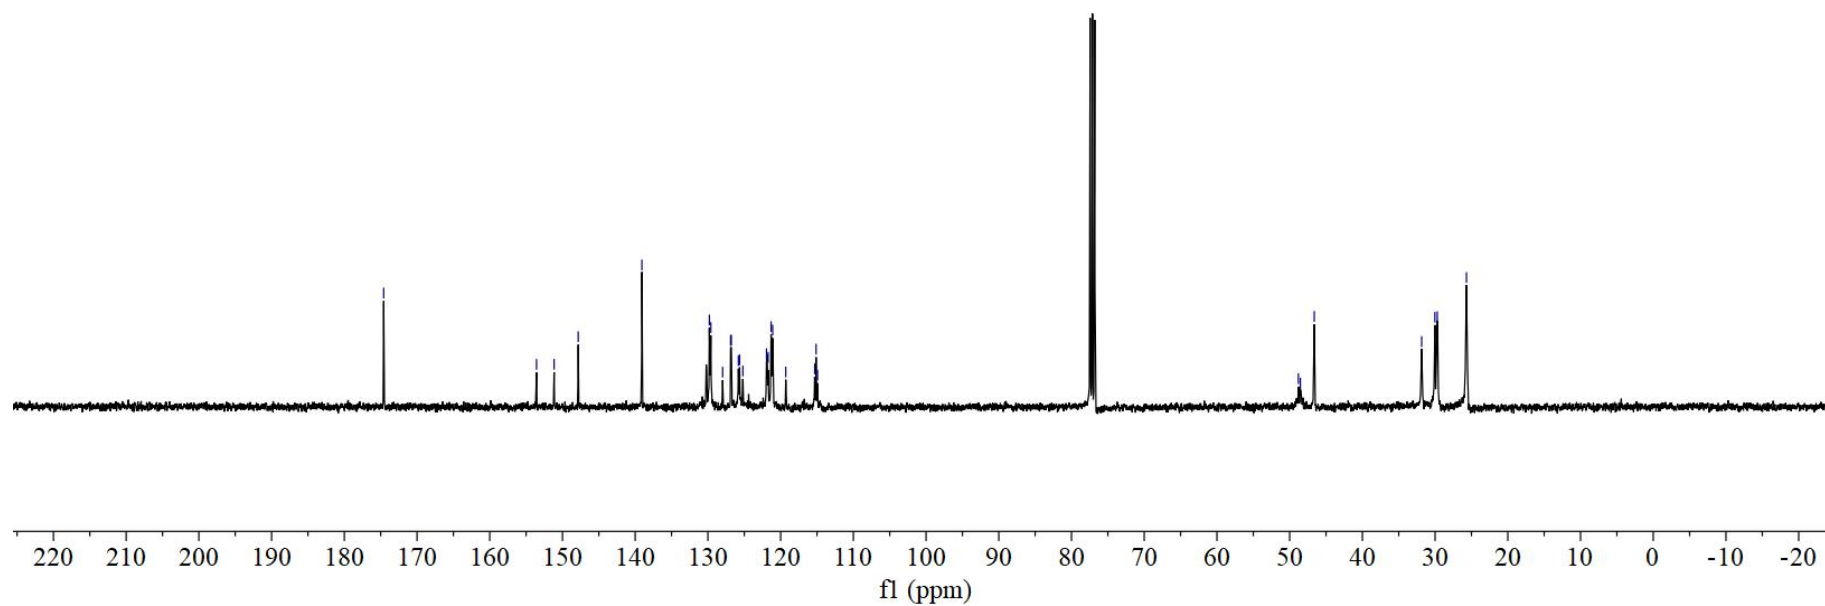

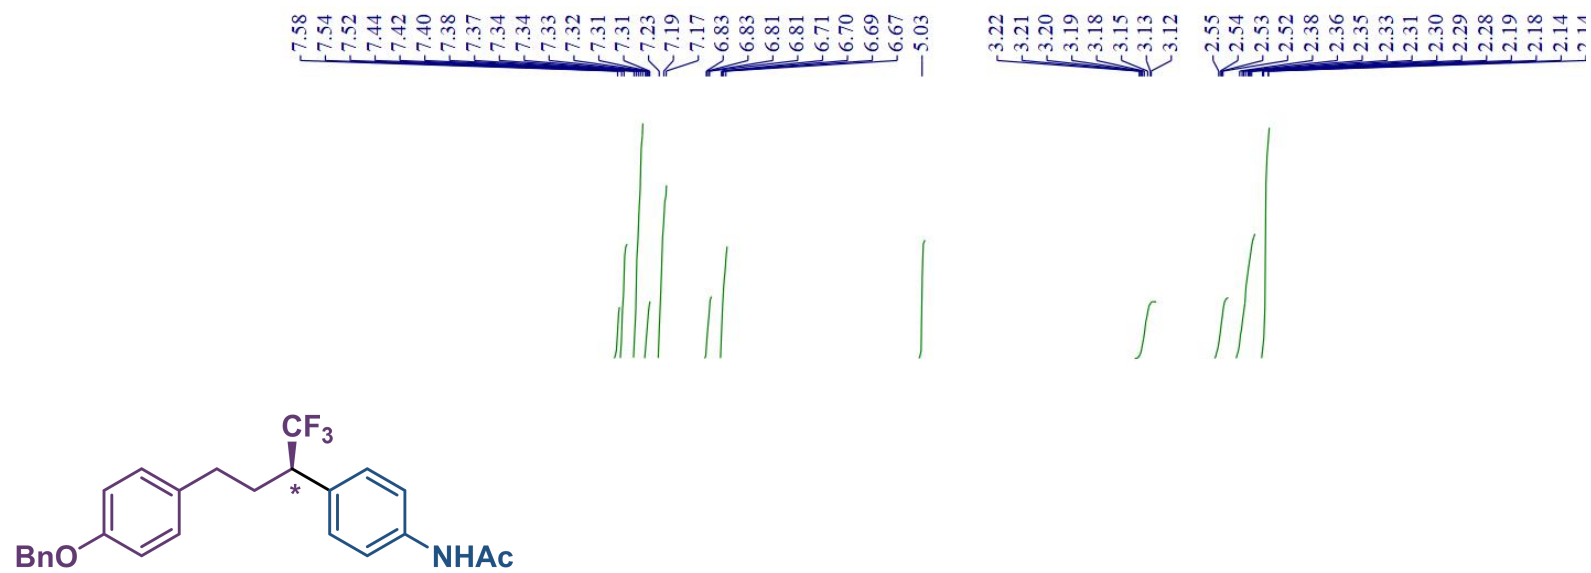

<sup>1</sup>H NMR of **3y** (400 MHz, Chloroform-d, 298 K)

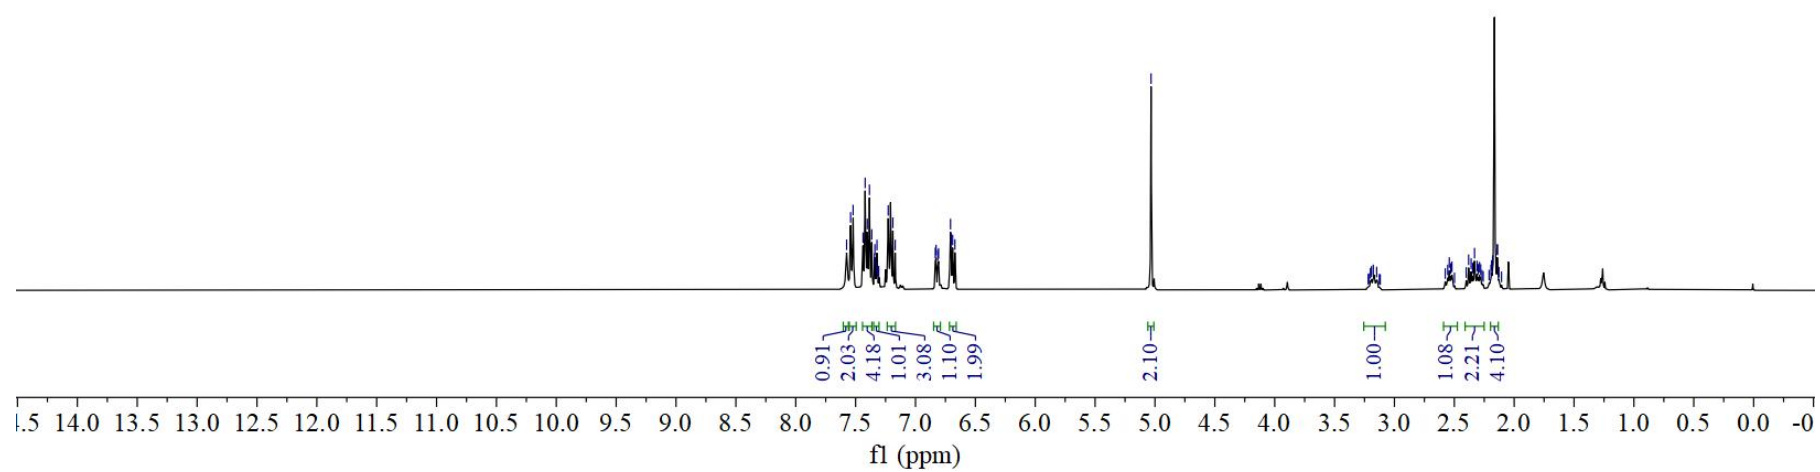



-69.68  
-69.71

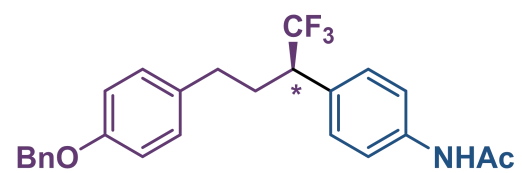

**<sup>19</sup>F NMR of **3y**** (376 MHz, Chloroform-*d*, 298 K)

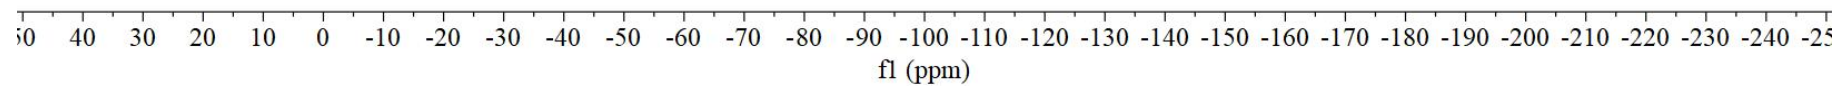

—168.69  
—159.06  
142.32  
138.05  
137.11  
129.88  
129.64  
128.70  
128.09  
127.62  
125.56  
121.19  
120.15  
115.27  
112.53

—70.04  
48.74  
48.48  
32.53  
30.42  
29.99  
24.63

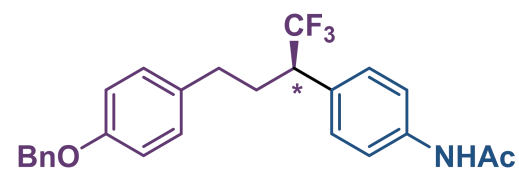

<sup>13</sup>C NMR of **3y** (101 MHz, Chloroform-*d*, 298 K)

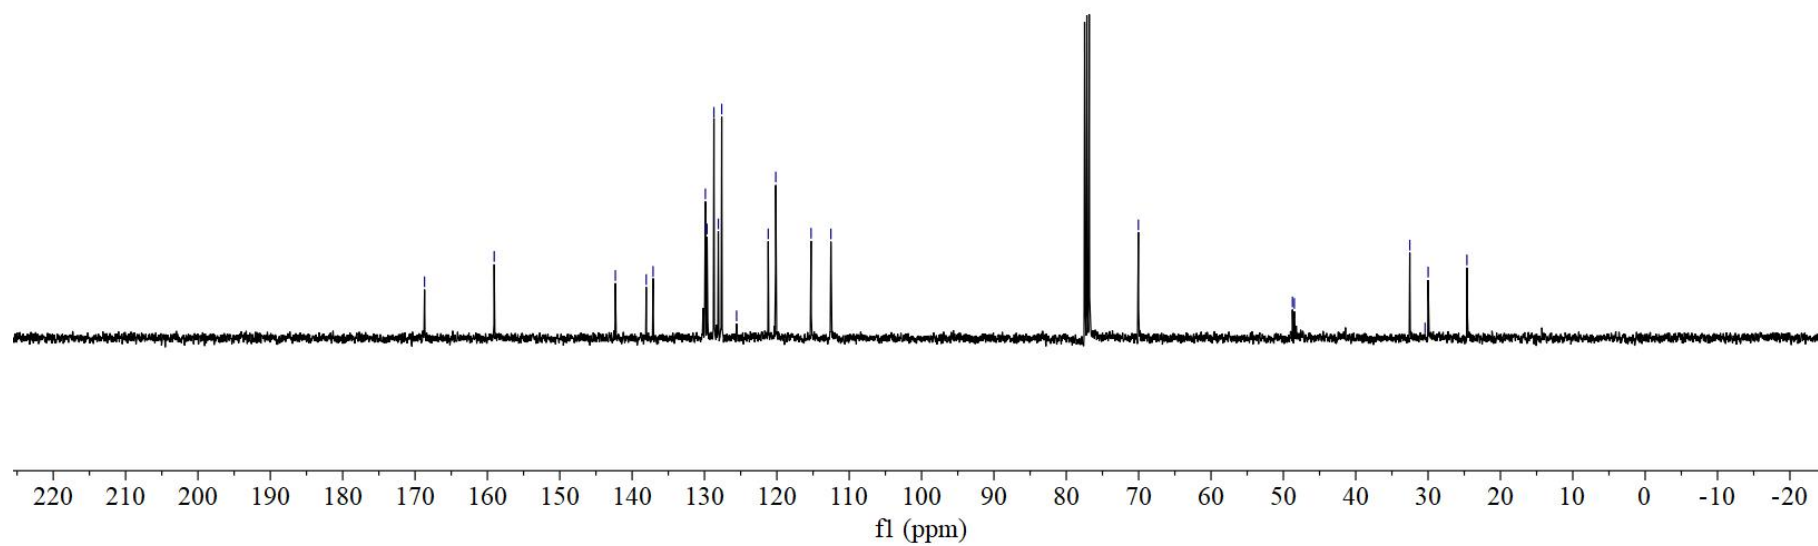

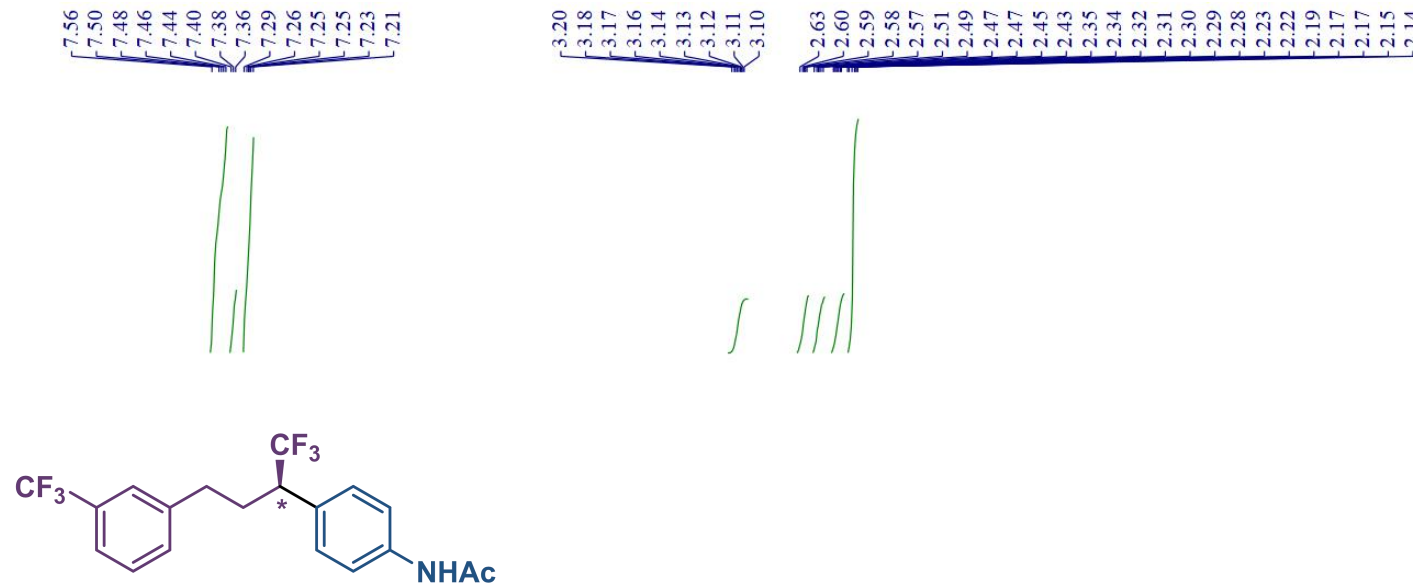

$^1\text{H}$  NMR of **3z** (400 MHz, Chloroform-*d*, 298 K)

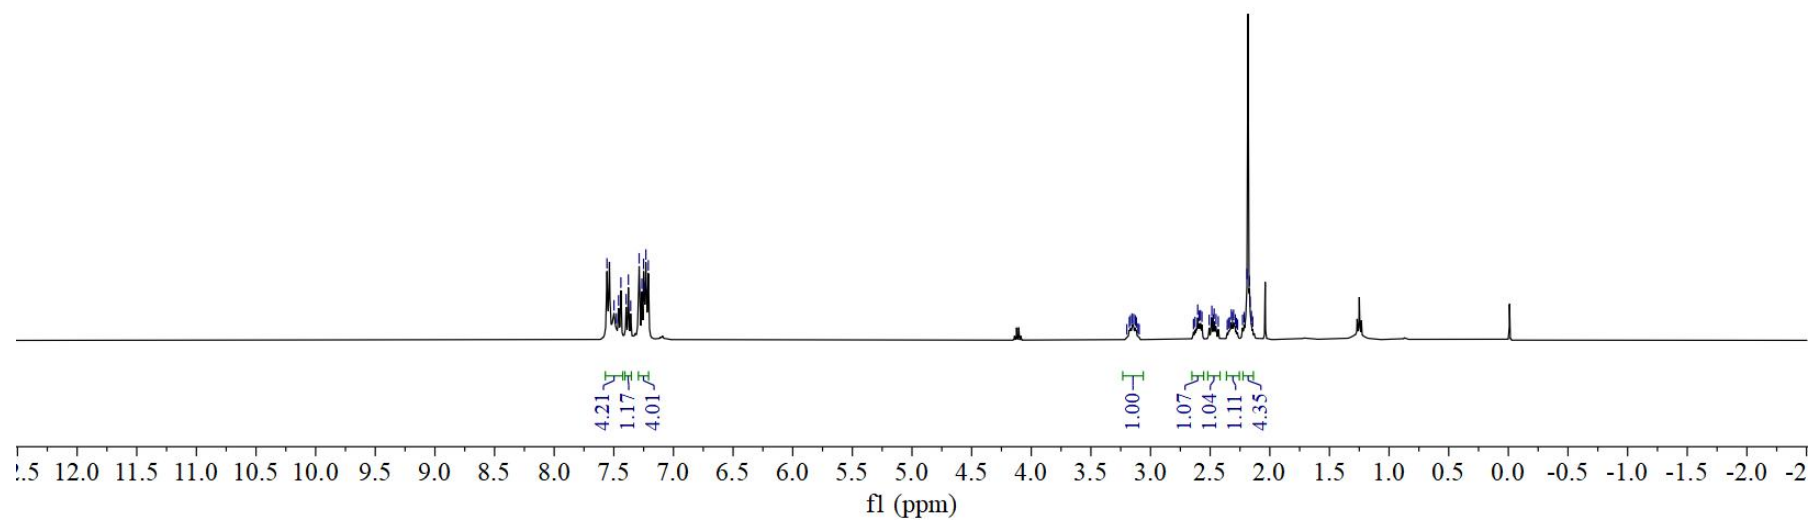

-62.49  
-69.78  
-69.81

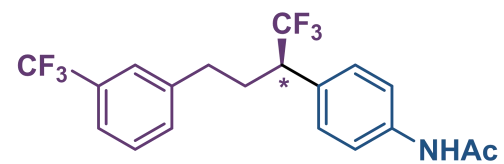

**<sup>19</sup>F NMR of 3z** (376 MHz, Chloroform-*d*, 298 K)

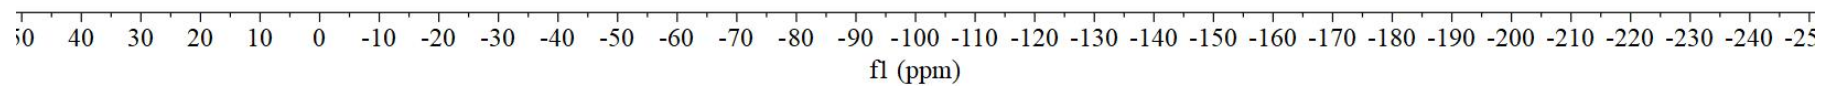

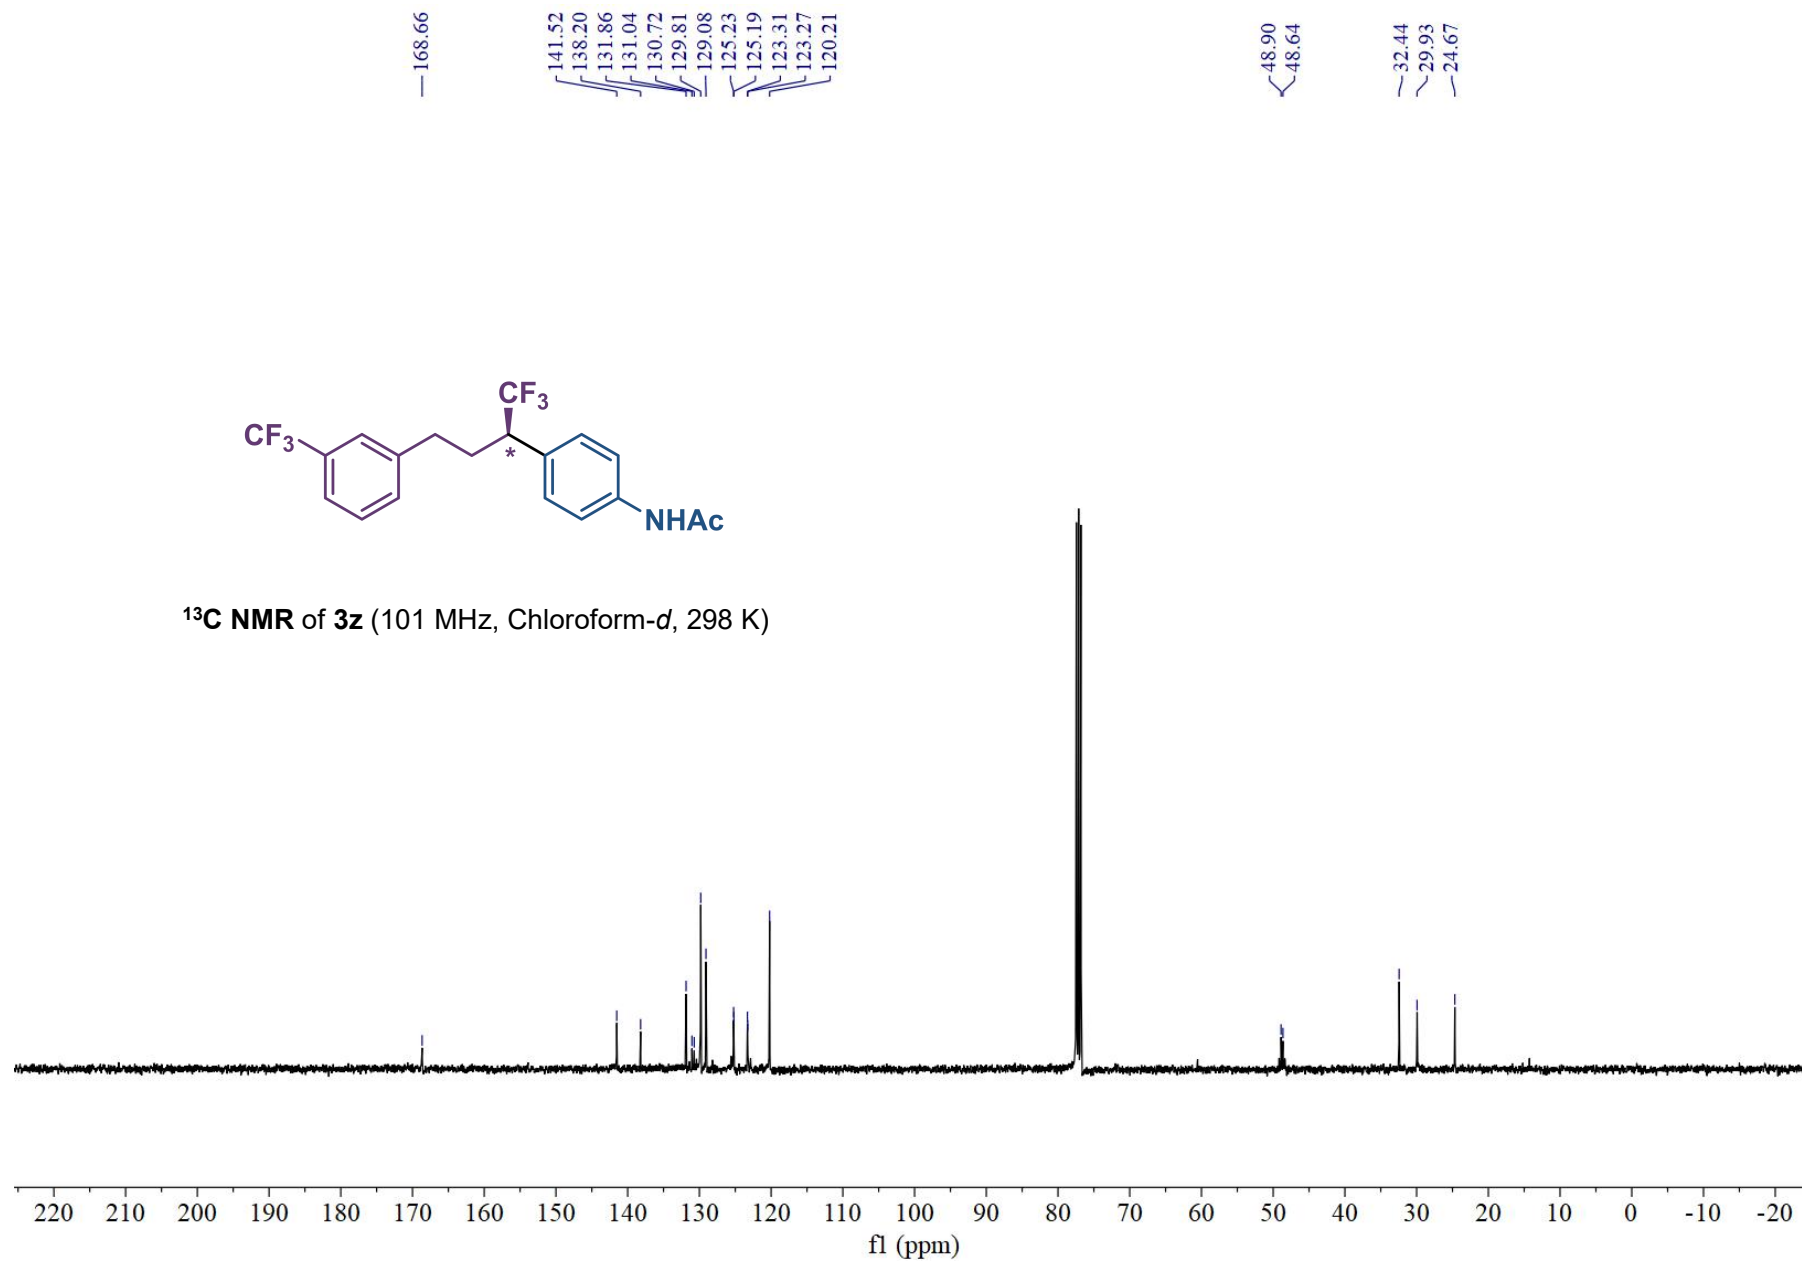

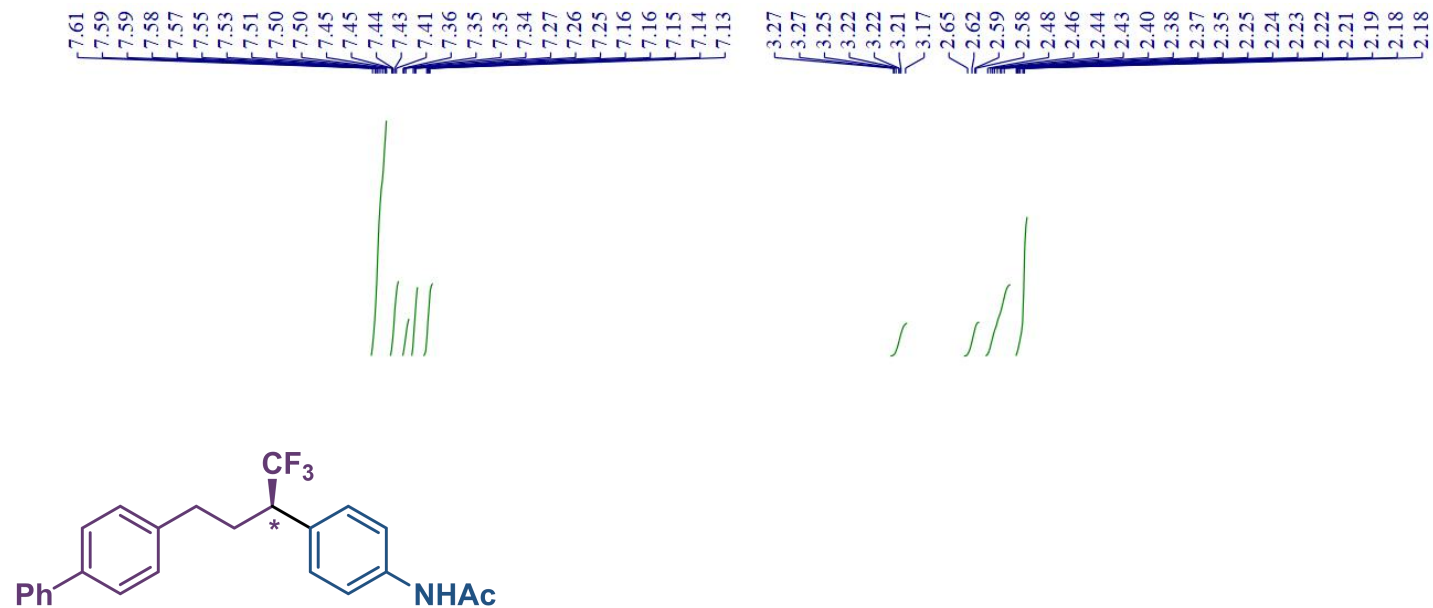

<sup>1</sup>H NMR of 3aa (400 MHz, Chloroform-d, 298 K)

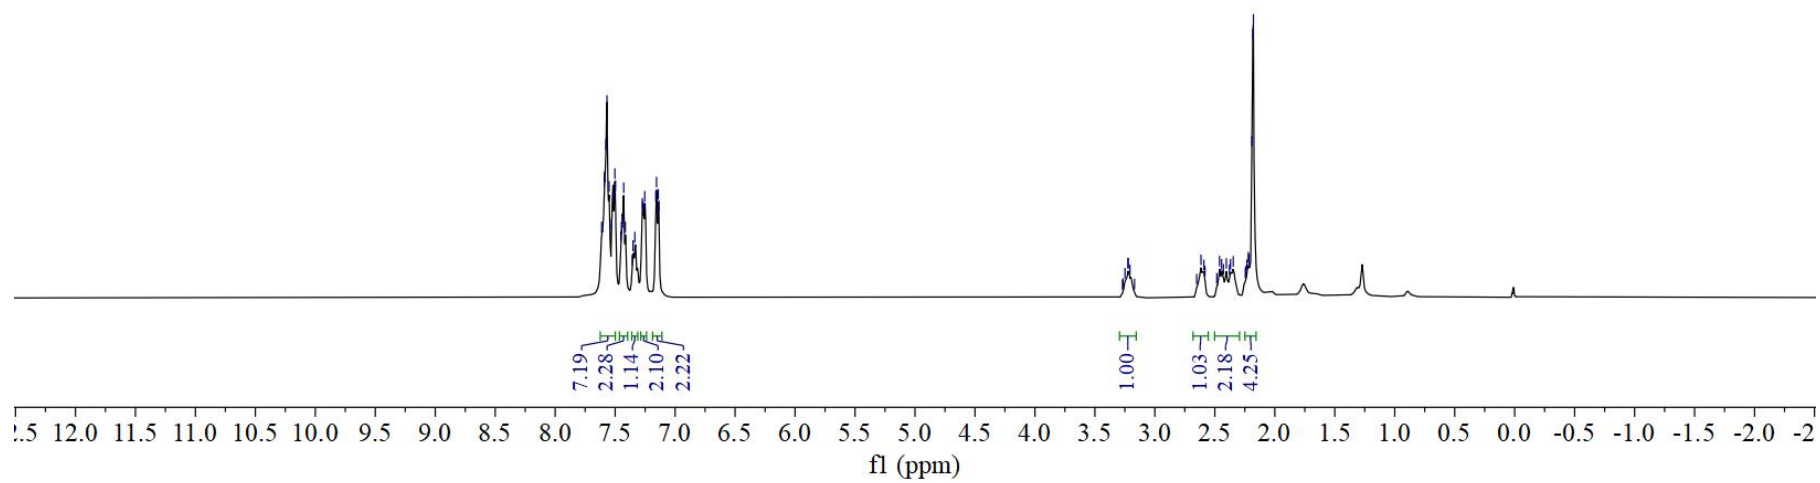

-69.65  
-69.68

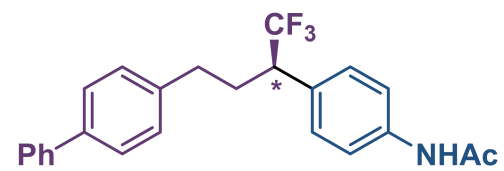

<sup>19</sup>F NMR of **3aa** (376 MHz, Chloroform-*d*, 298 K)

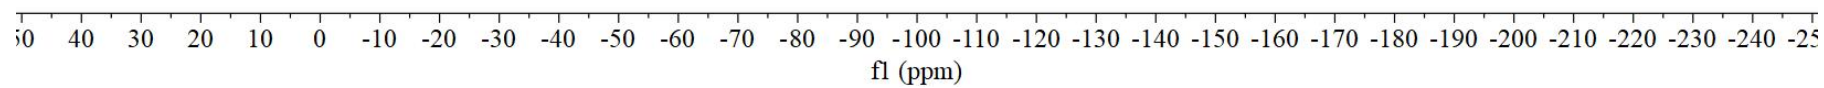

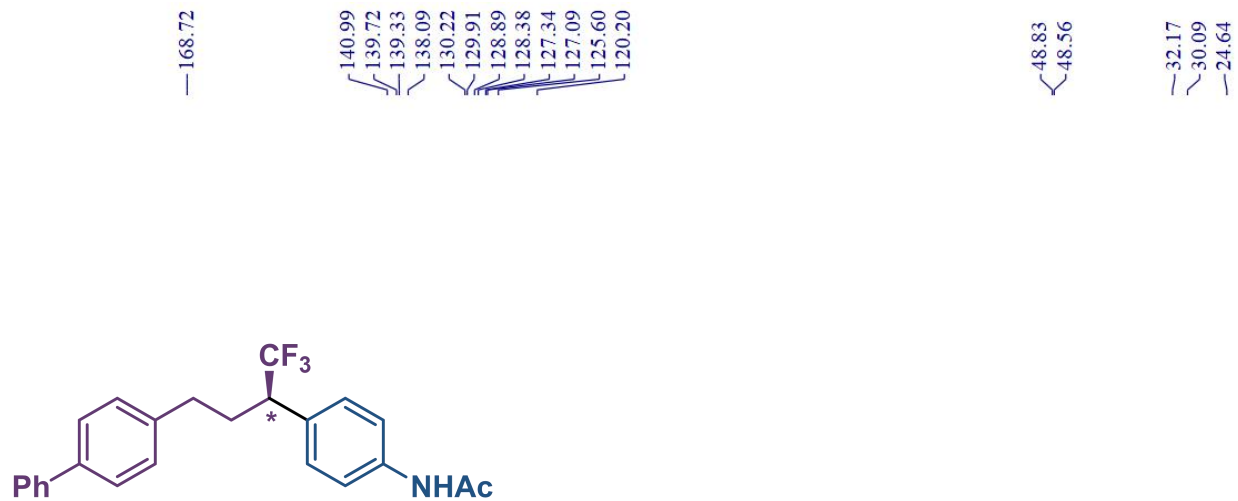

$^{13}\text{C}$  NMR of **3aa** (101 MHz, Chloroform-*d*, 298 K)

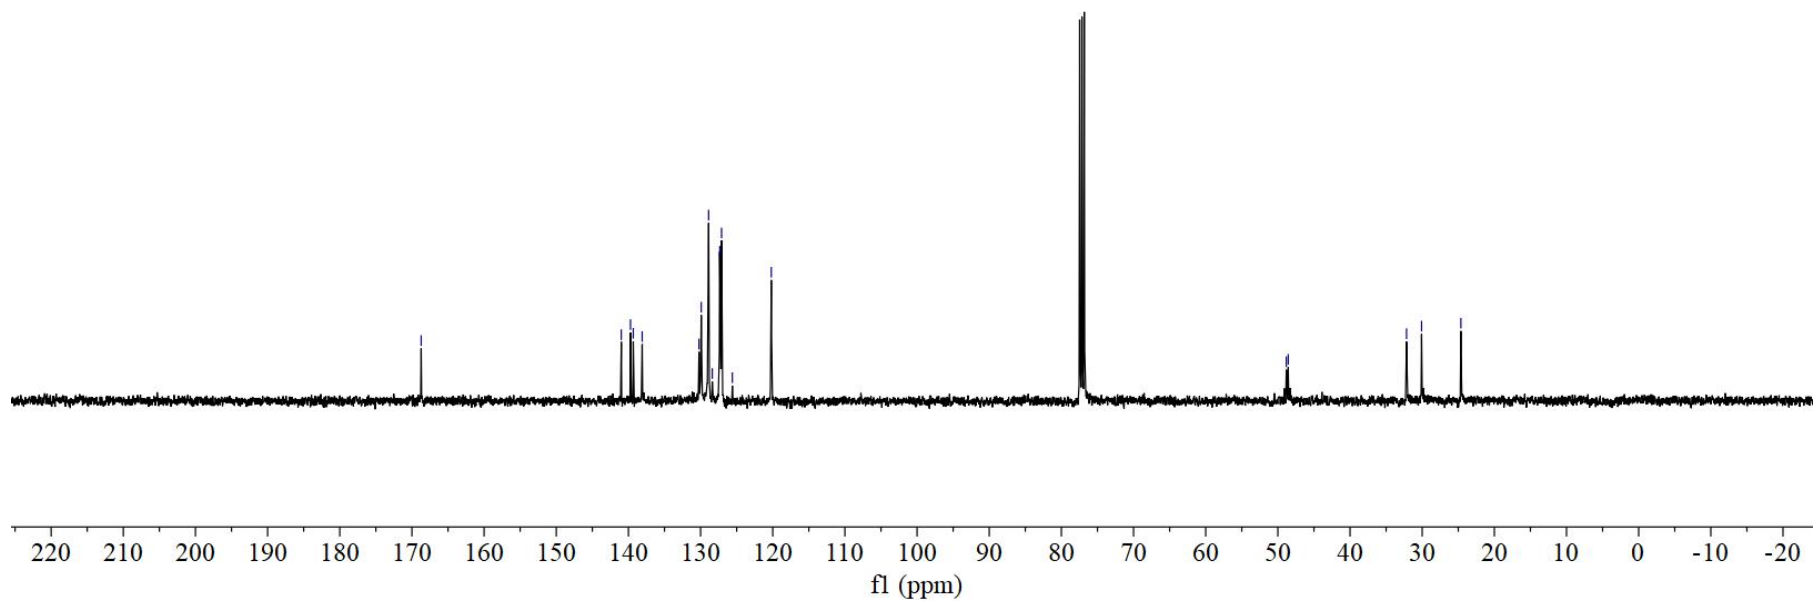



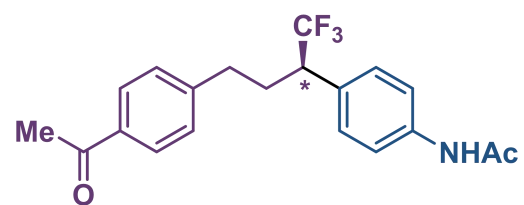

$^1\text{H NMR}$  of **3ab** (400 MHz, Chloroform-*d*, 298 K)

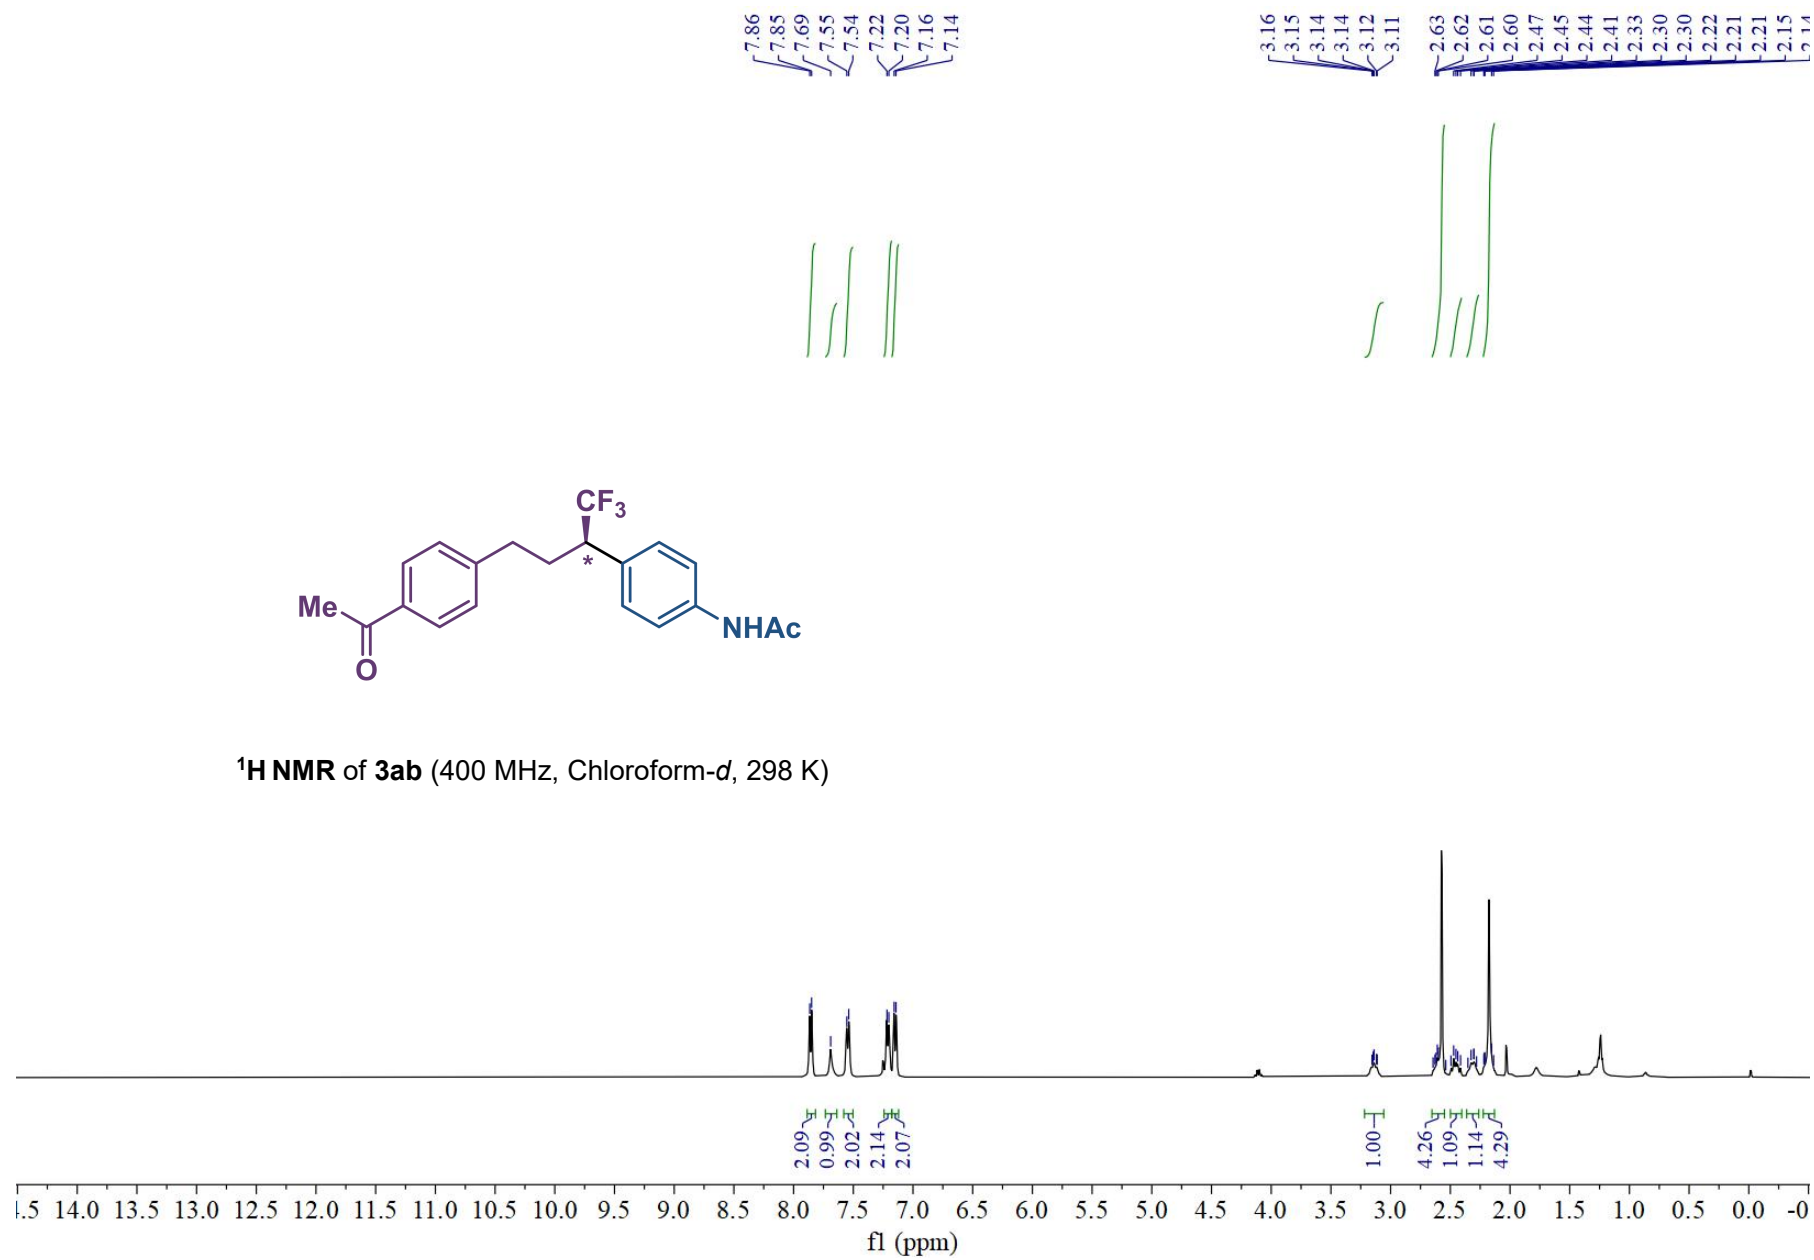

-69.77  
-69.79

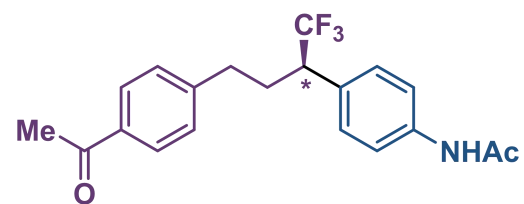

**<sup>19</sup>F NMR of 3ab** (376 MHz, Chloroform-*d*, 298 K)

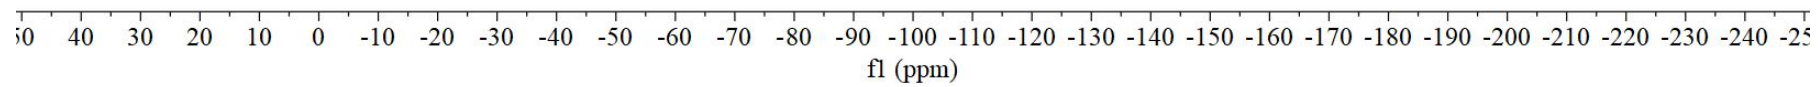

—198.08  
—168.74  
—146.44  
138.26  
135.51  
129.79  
128.78  
128.73  
—120.21  
48.81  
48.54  
32.55  
29.73  
26.68  
24.64

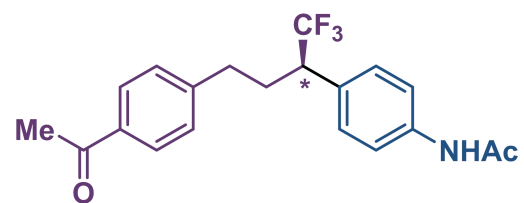

<sup>13</sup>C NMR of **3ab** (101 MHz, Chloroform-*d*, 298 K)

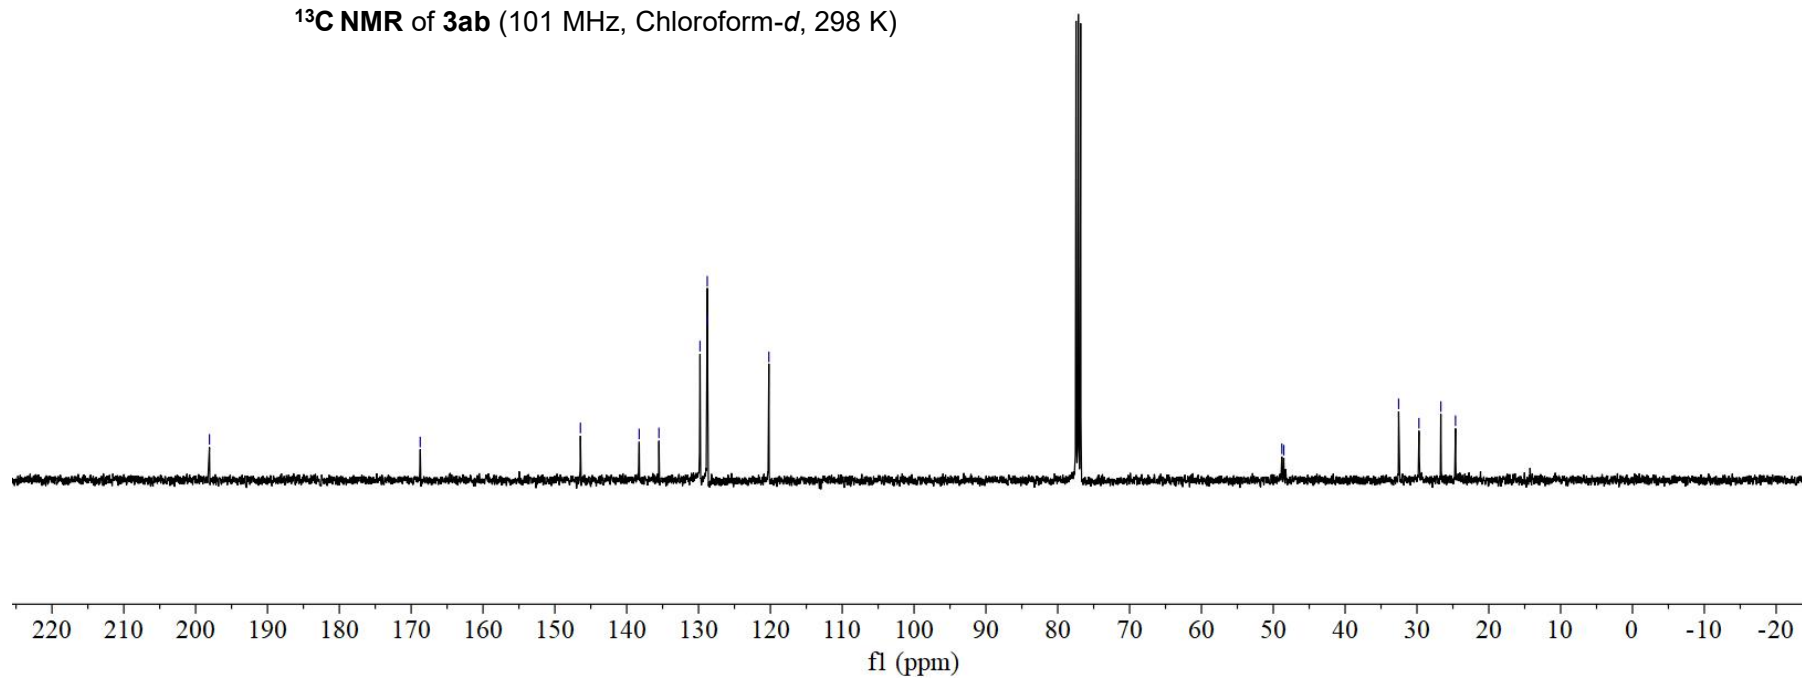

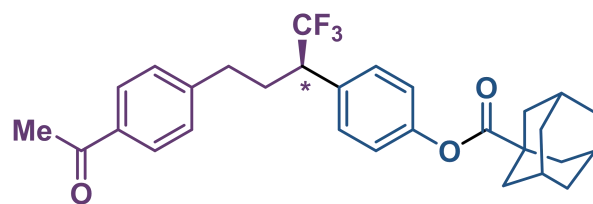

$^1\text{H NMR}$  of **3ac** (400 MHz, Chloroform-*d*, 298 K)

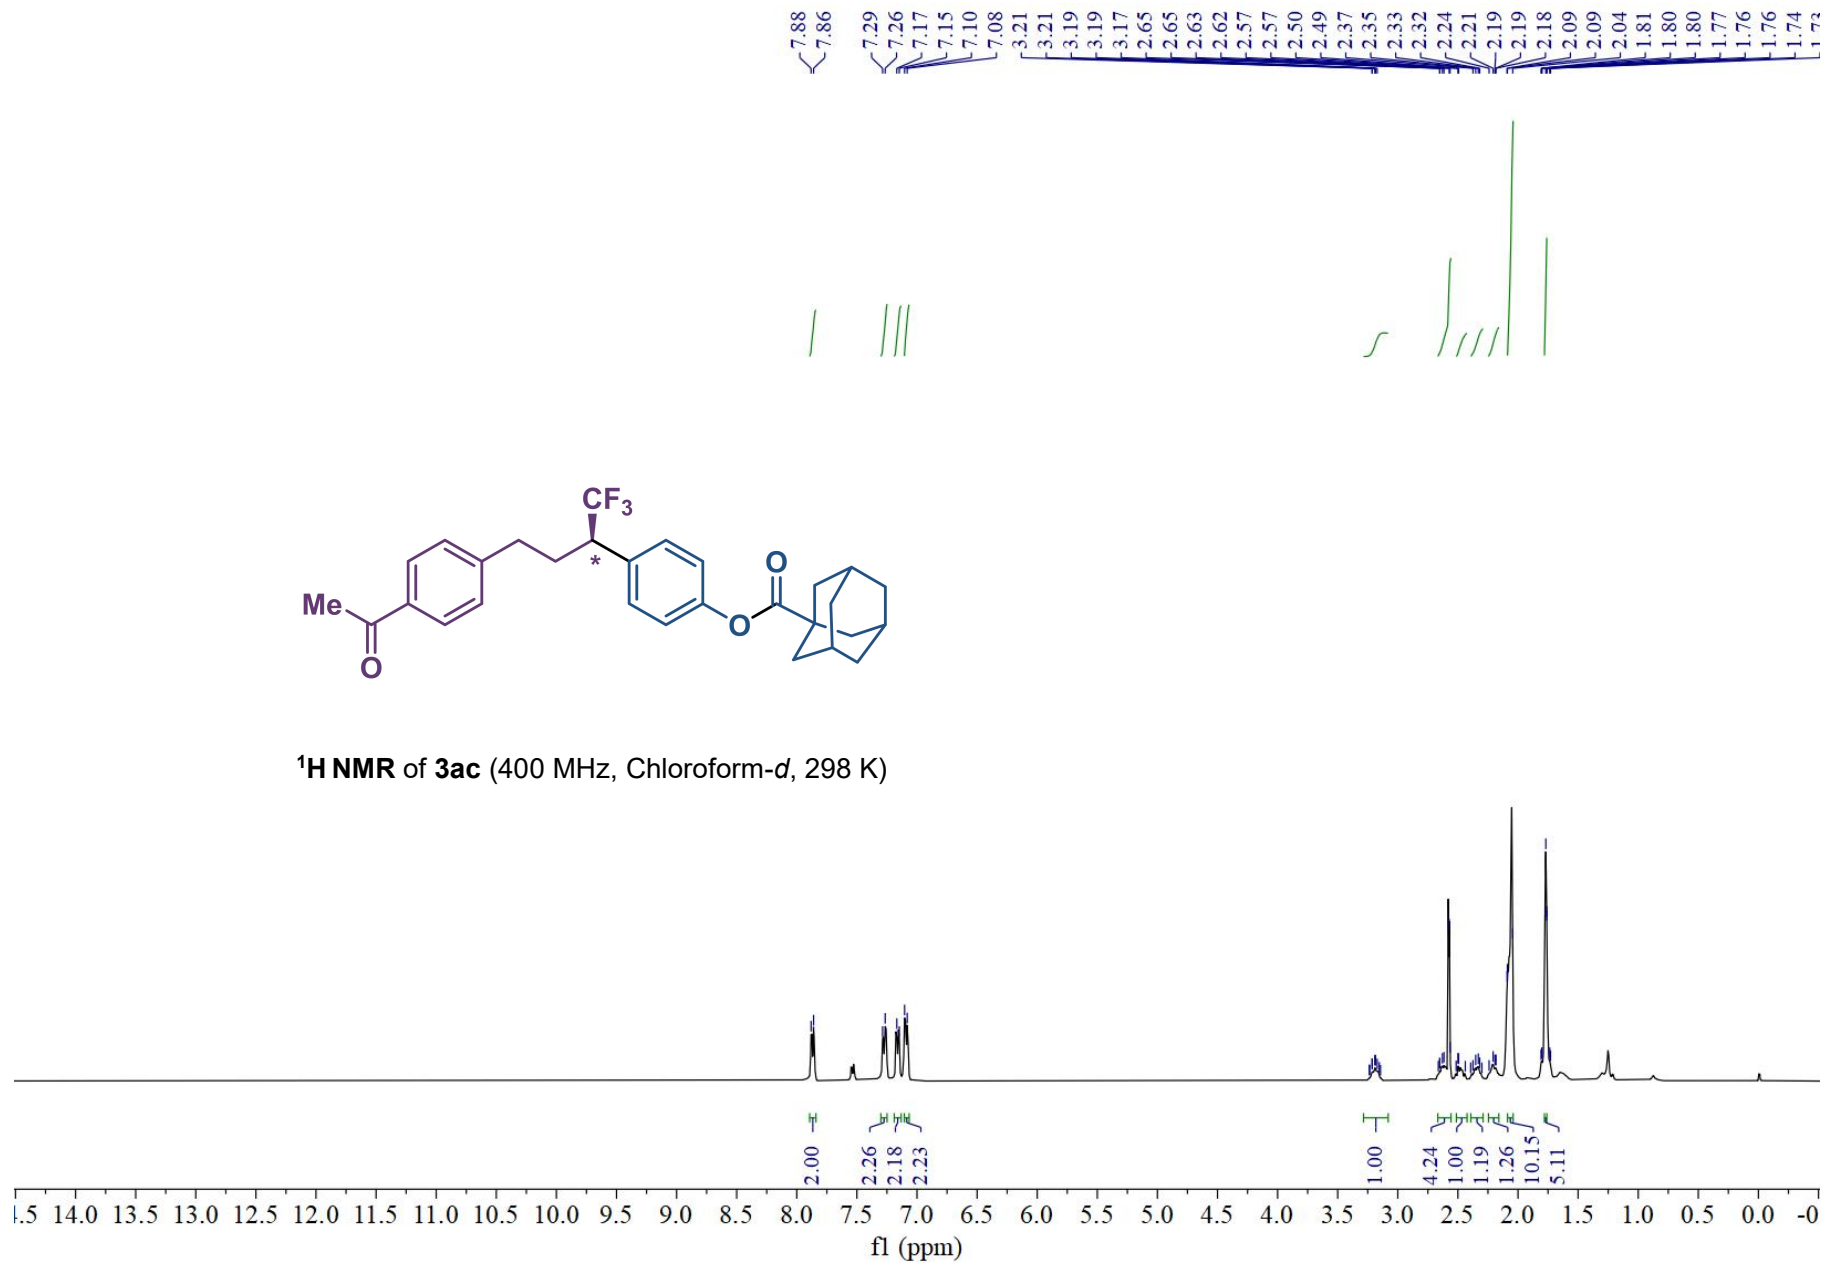

-69.72  
-69.75

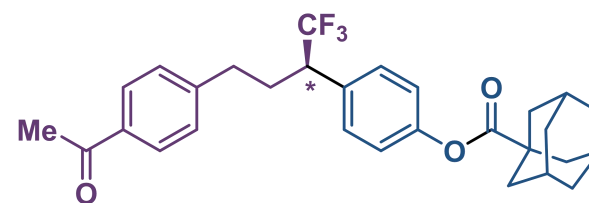

**<sup>19</sup>F NMR of 3ac** (376 MHz, Chloroform-*d*, 298 K)

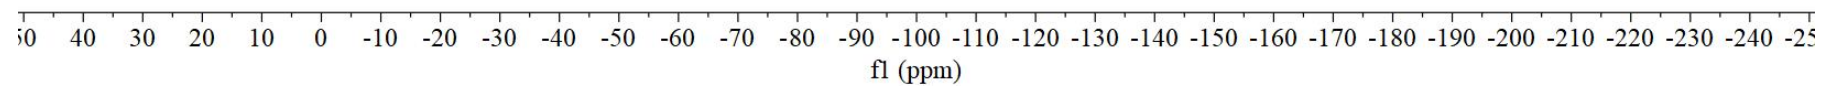

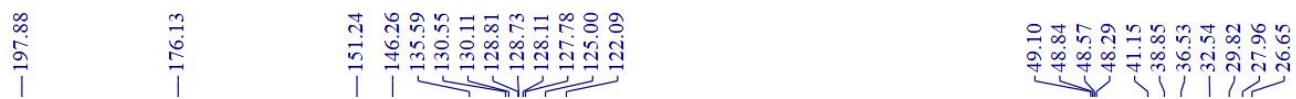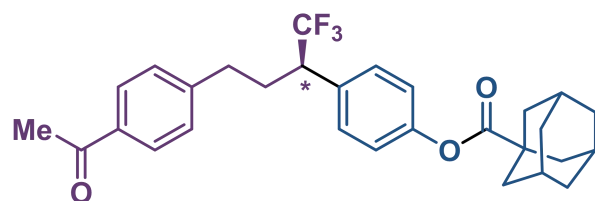

$^{13}\text{C}$  NMR of **3ac** (101 MHz, Chloroform-*d*, 298 K)

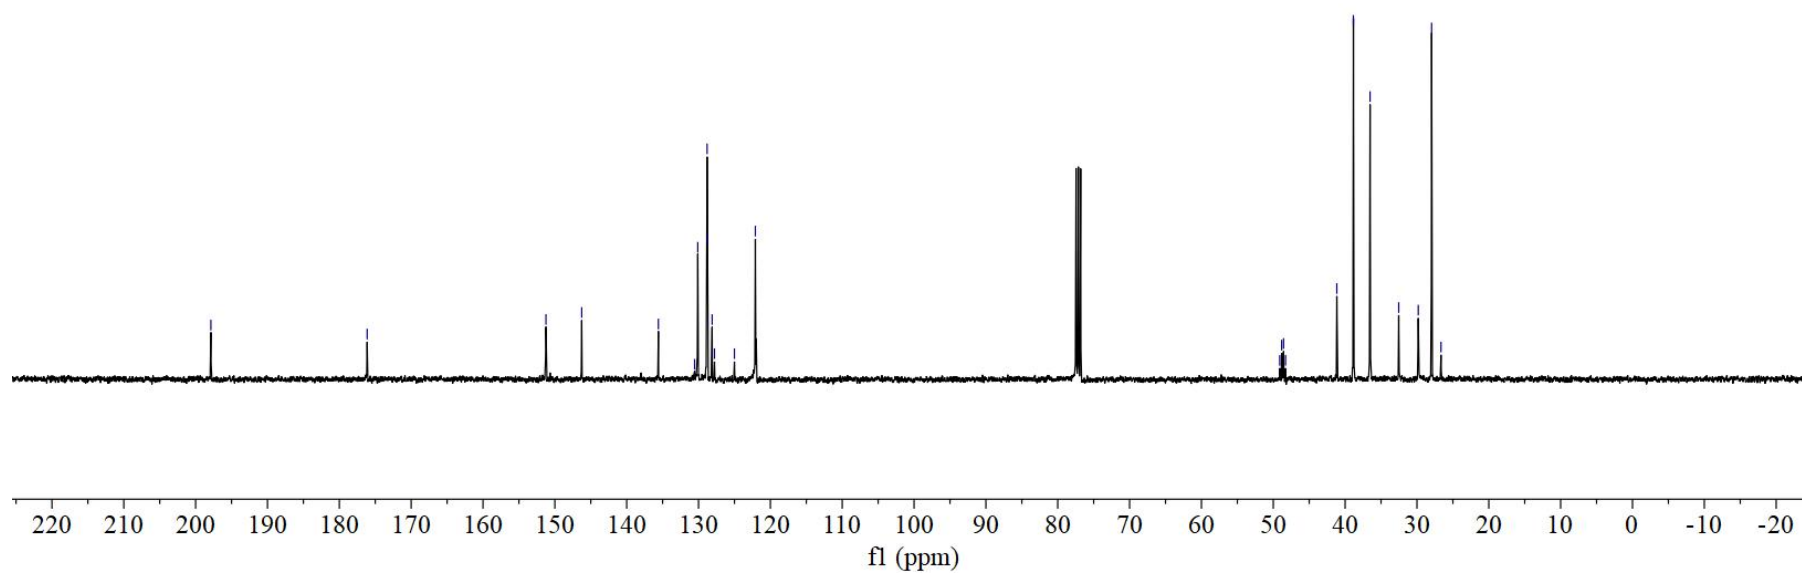

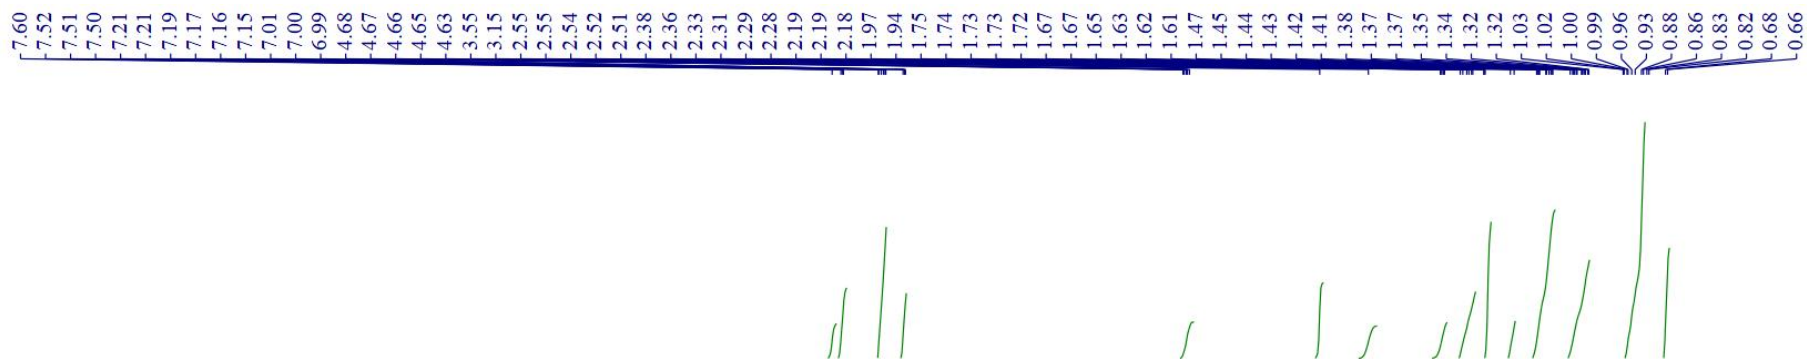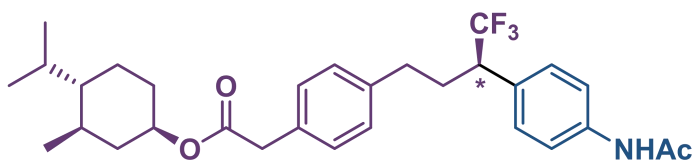

<sup>1</sup>H NMR of 3ad (400 MHz, Chloroform-*d*, 298 K)

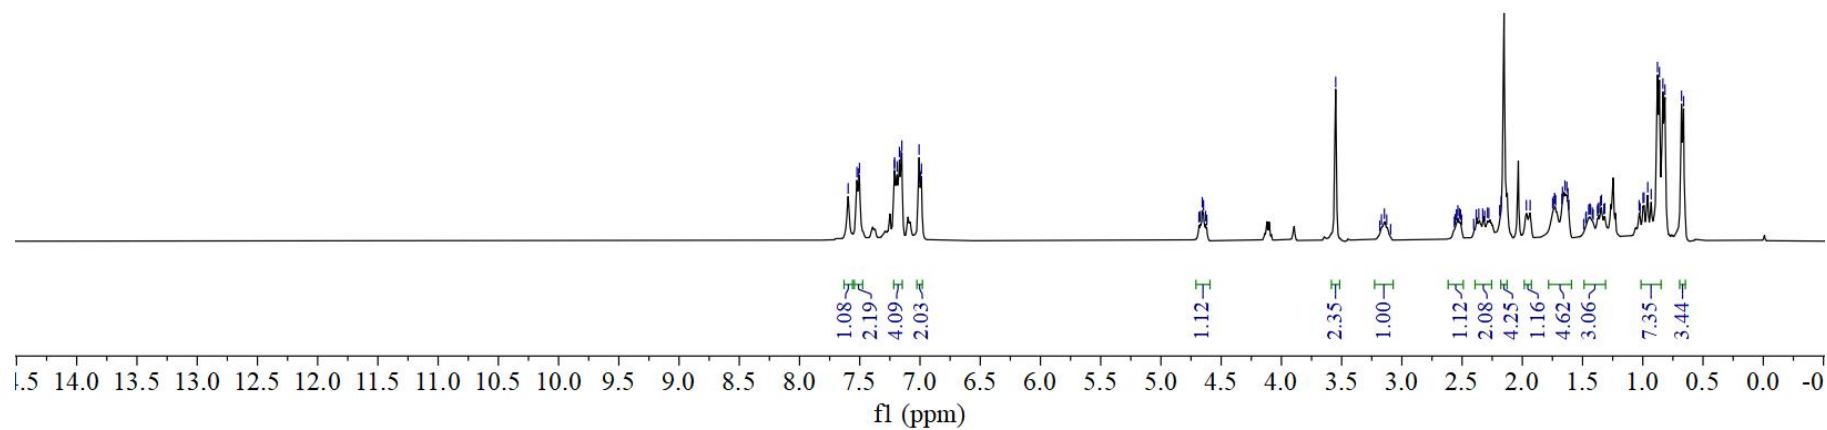

-69.75  
-69.78

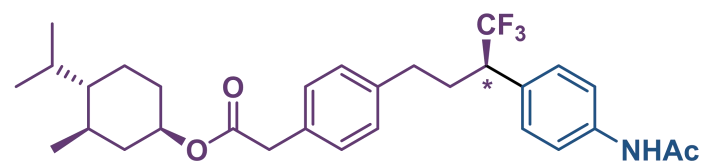

<sup>19</sup>F NMR of 3ad (376 MHz, Chloroform-*d*, 298 K)

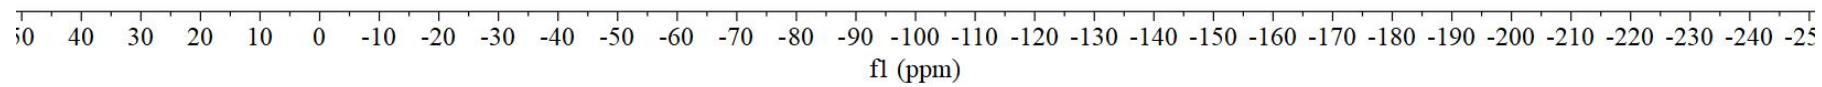



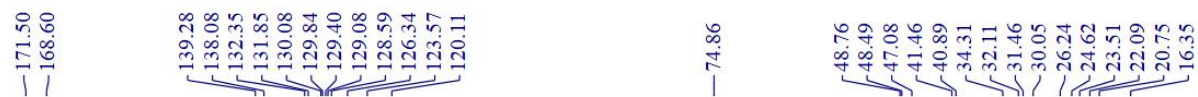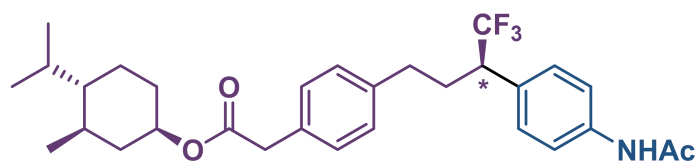

$^{13}\text{C}$  NMR of **3ad** (101 MHz, Chloroform-*d*, 298 K)

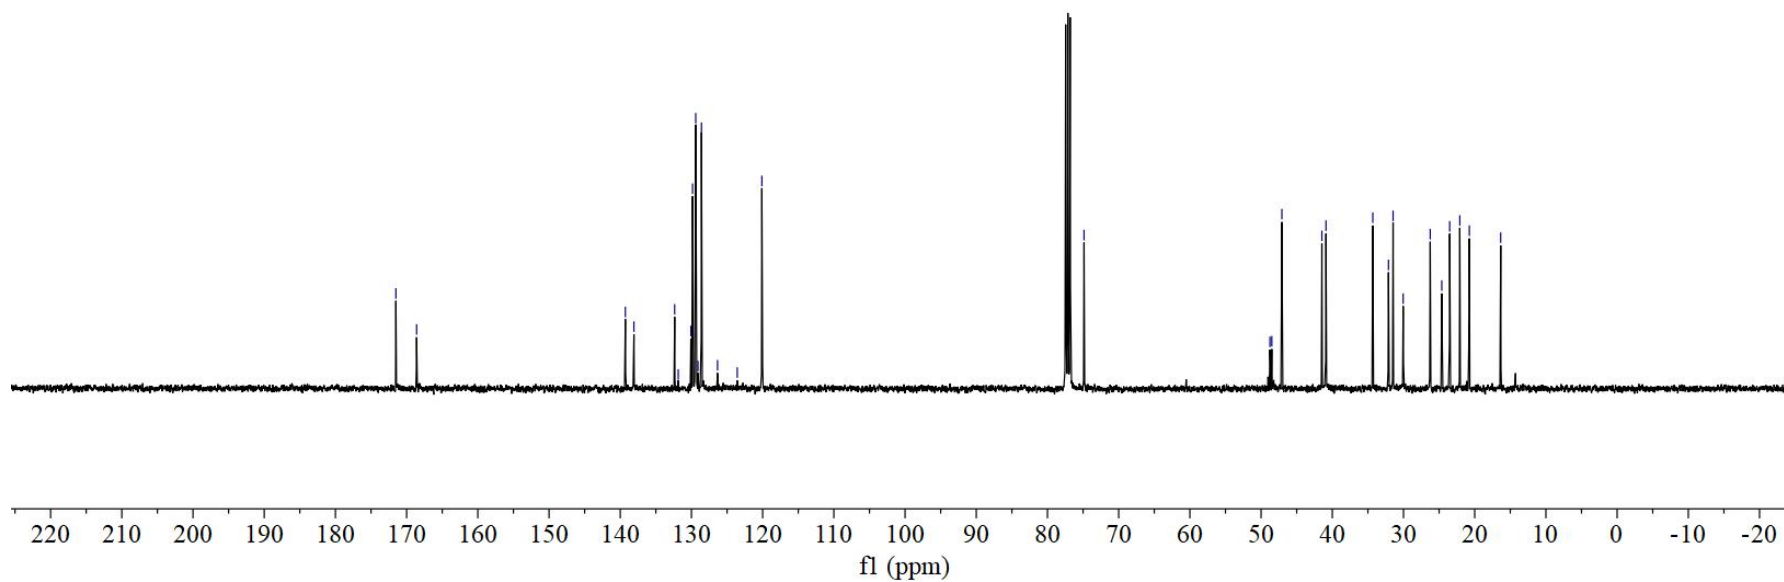

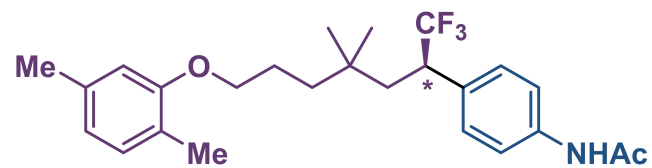

$^1\text{H NMR}$  of **3ae** (400 MHz, Chloroform- $d$ , 298 K)

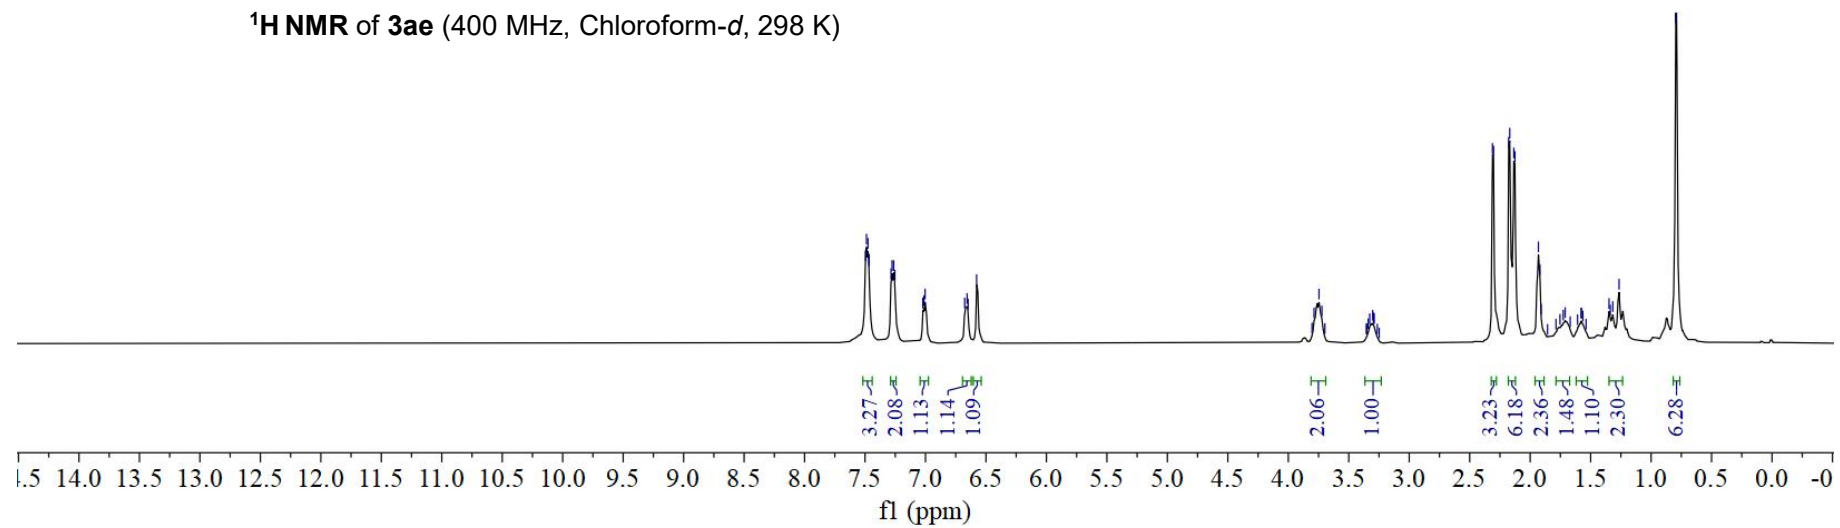

-70.19  
-70.22

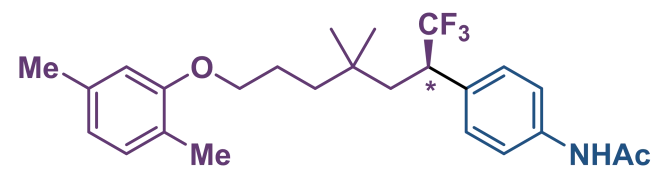

<sup>19</sup>F NMR of **3ae** (376 MHz, Chloroform-*d*, 298 K)

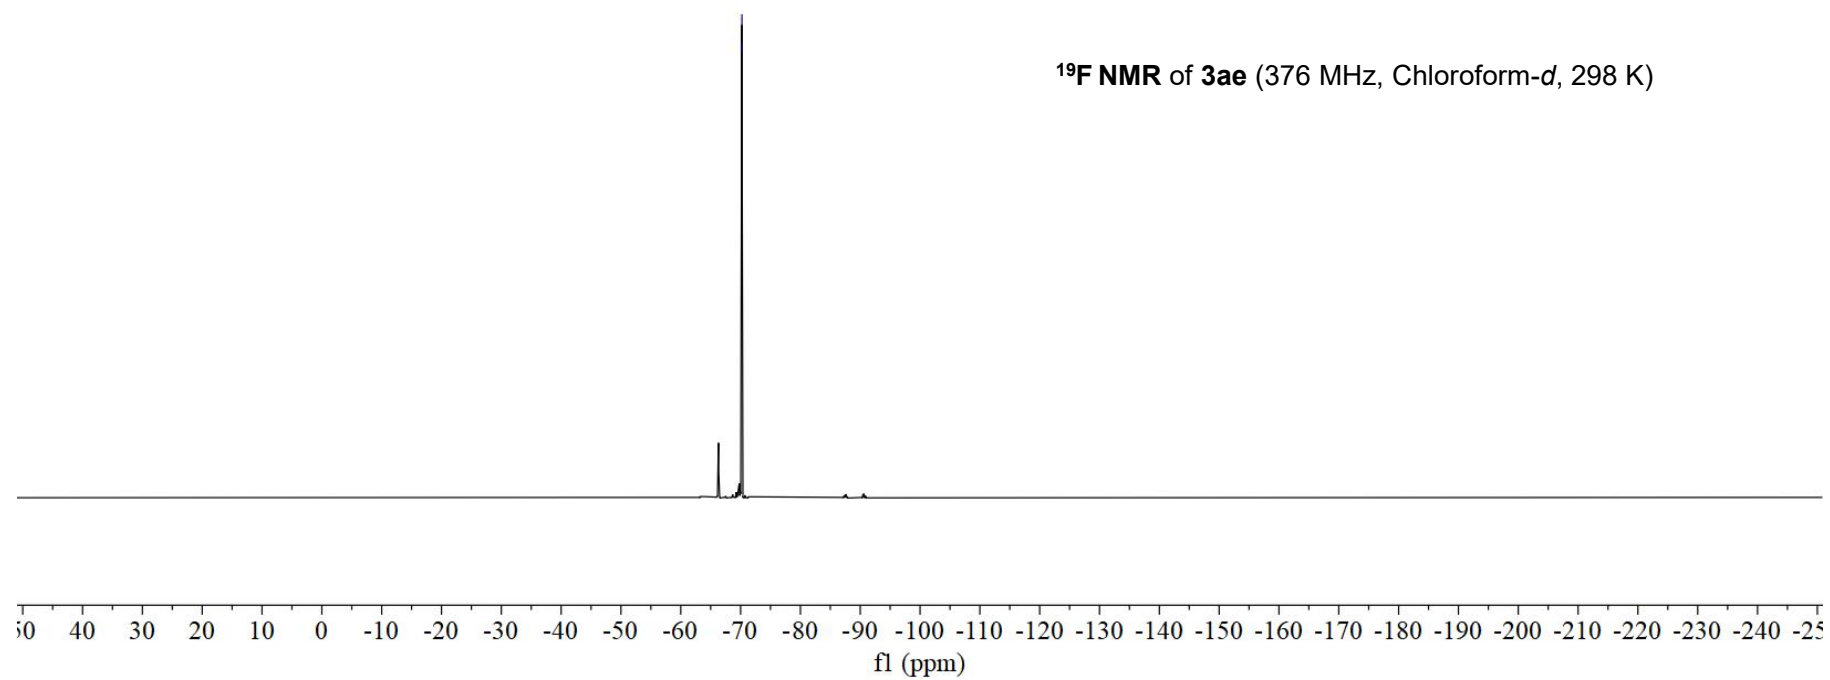

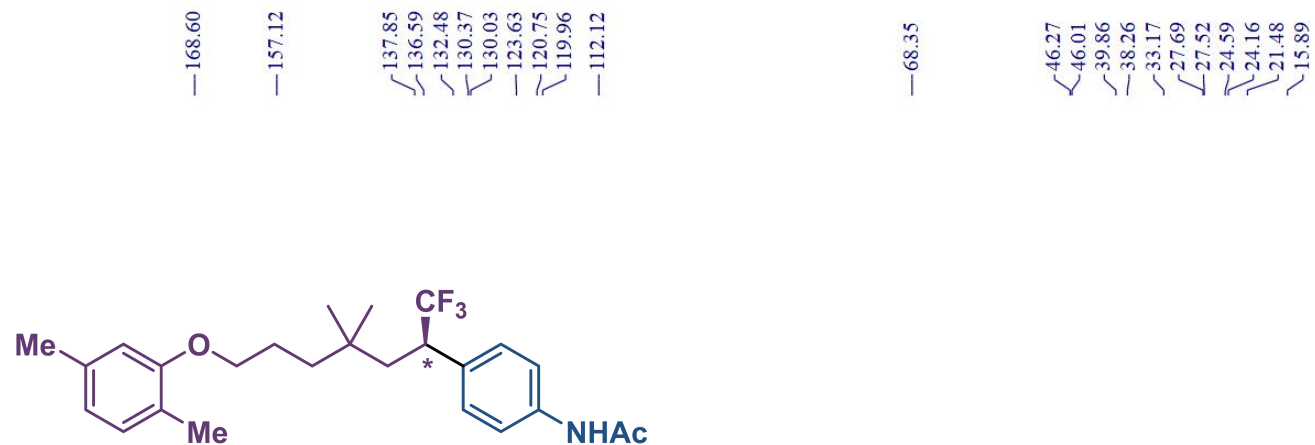

$^{13}\text{C}$  NMR of **3ae** (101 MHz, Chloroform-*d*, 298 K)

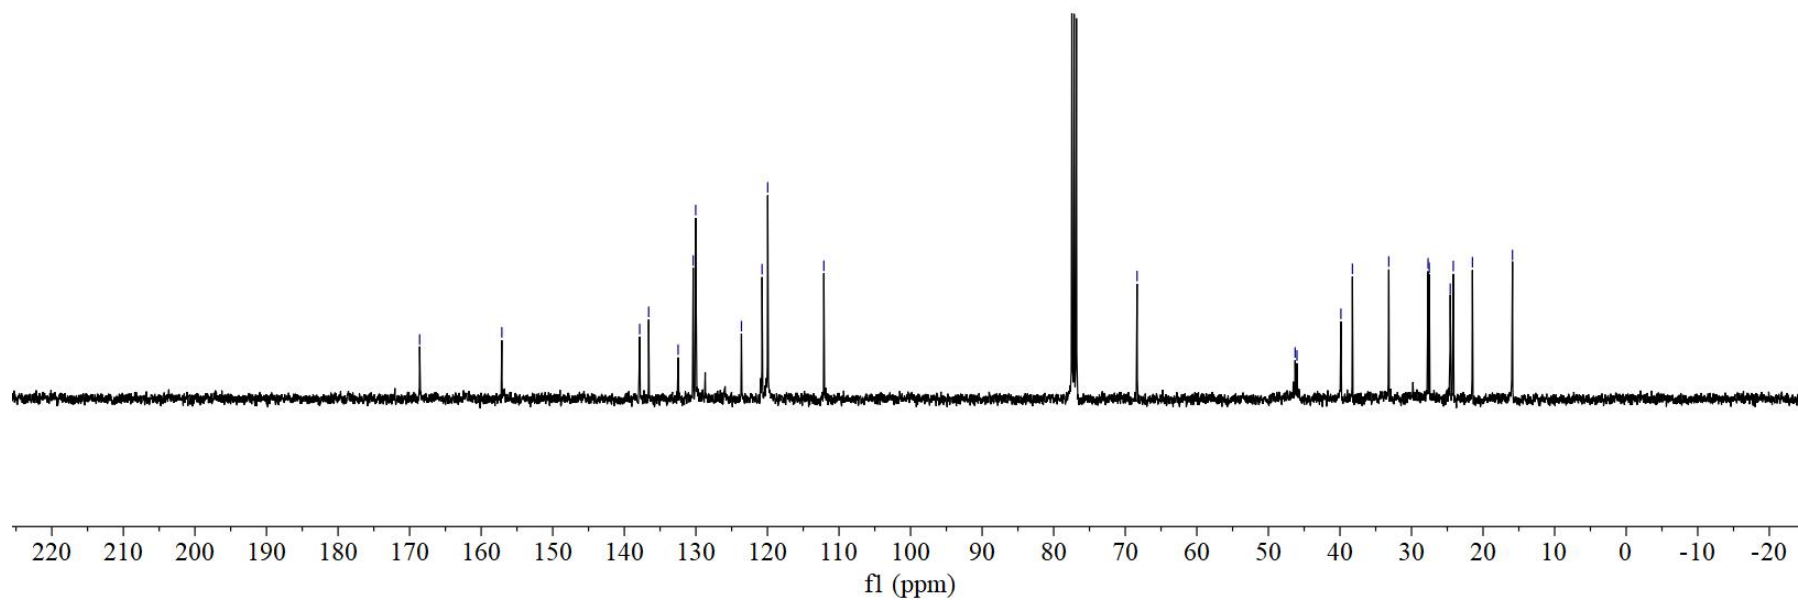

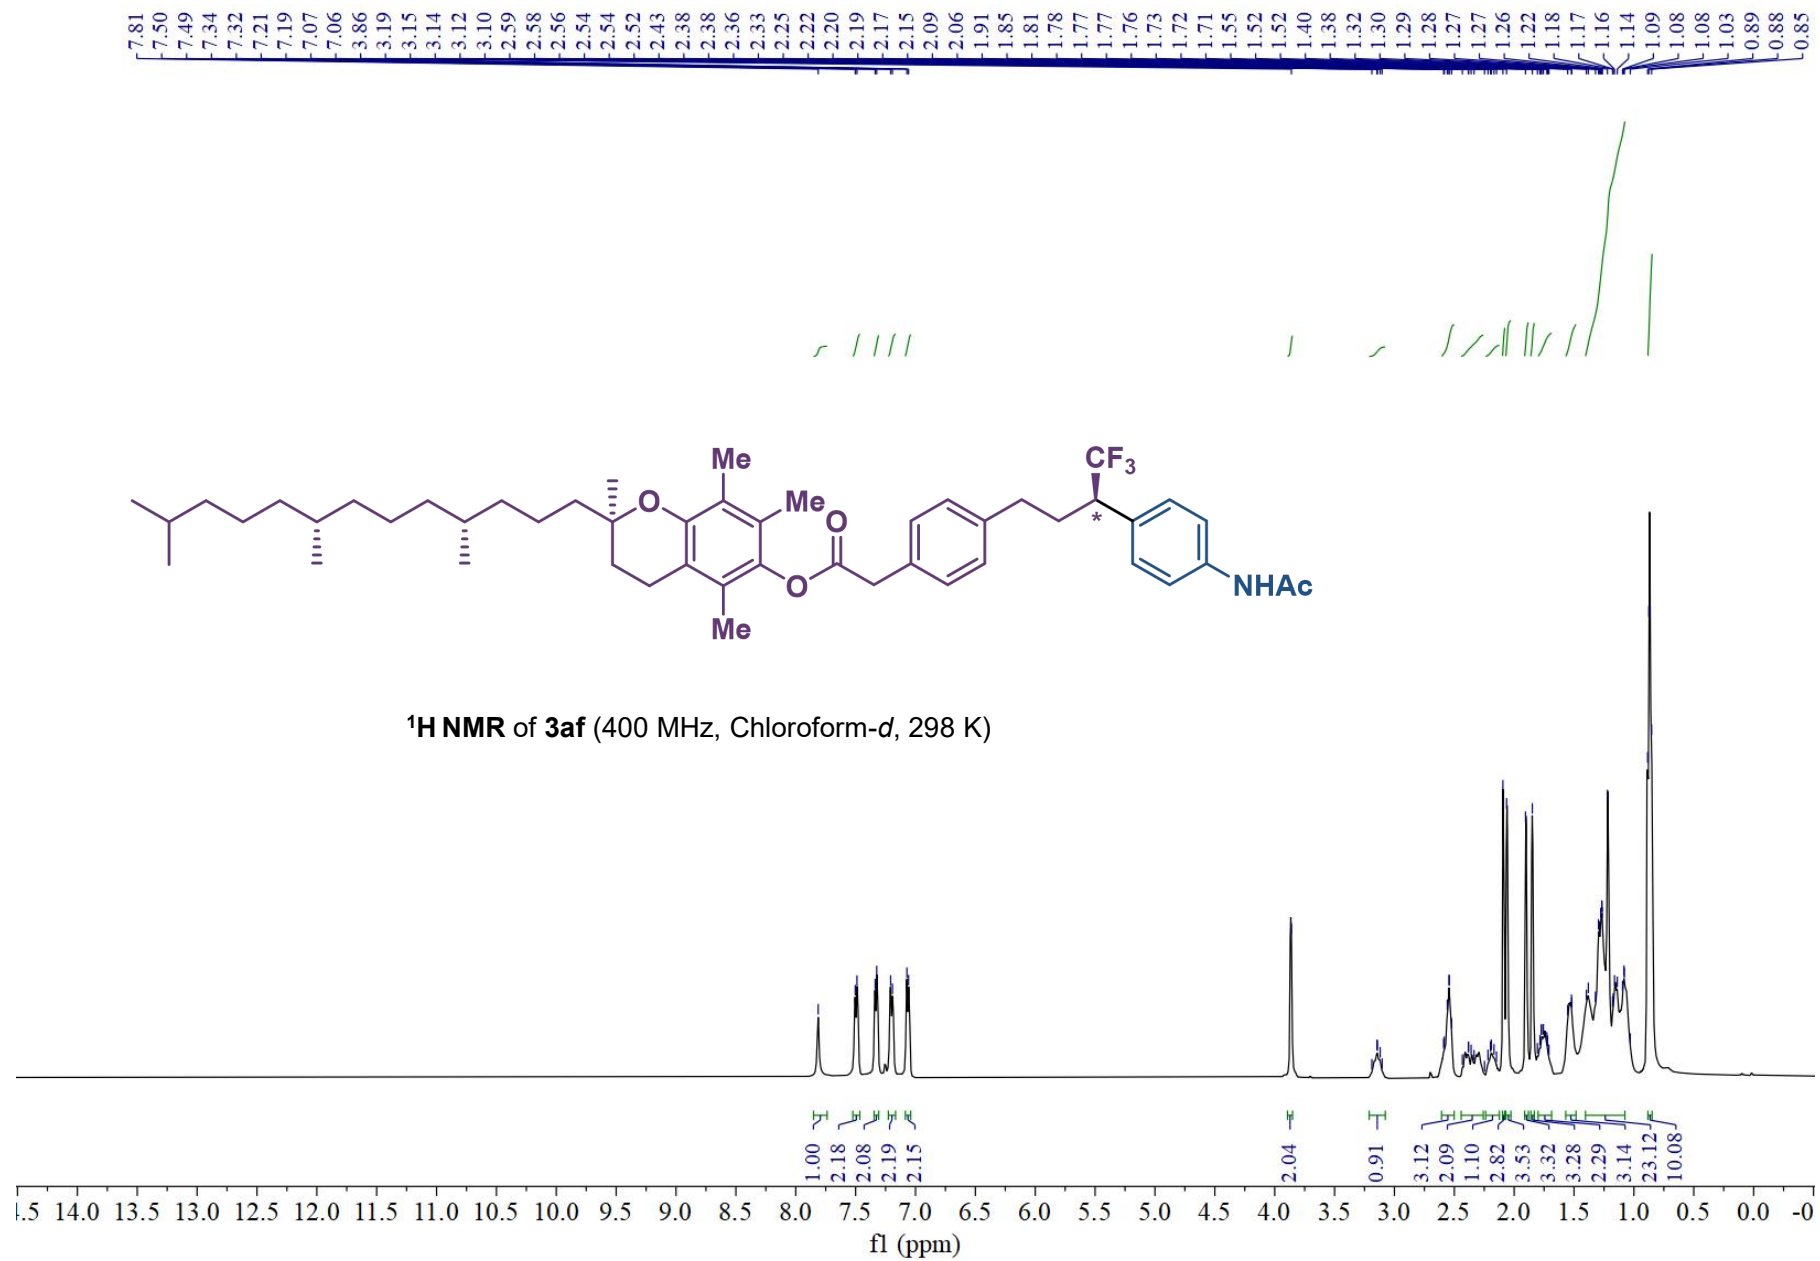

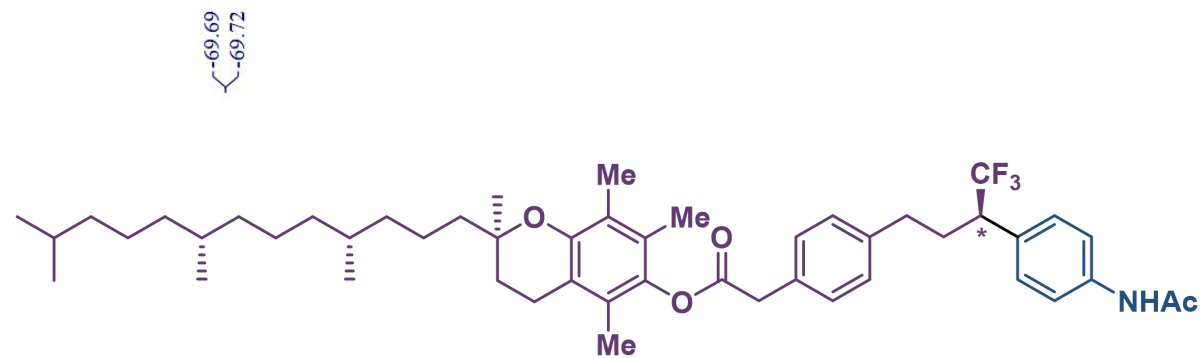

<sup>19</sup>F NMR of 3af (376 MHz, Chloroform-d, 298 K)

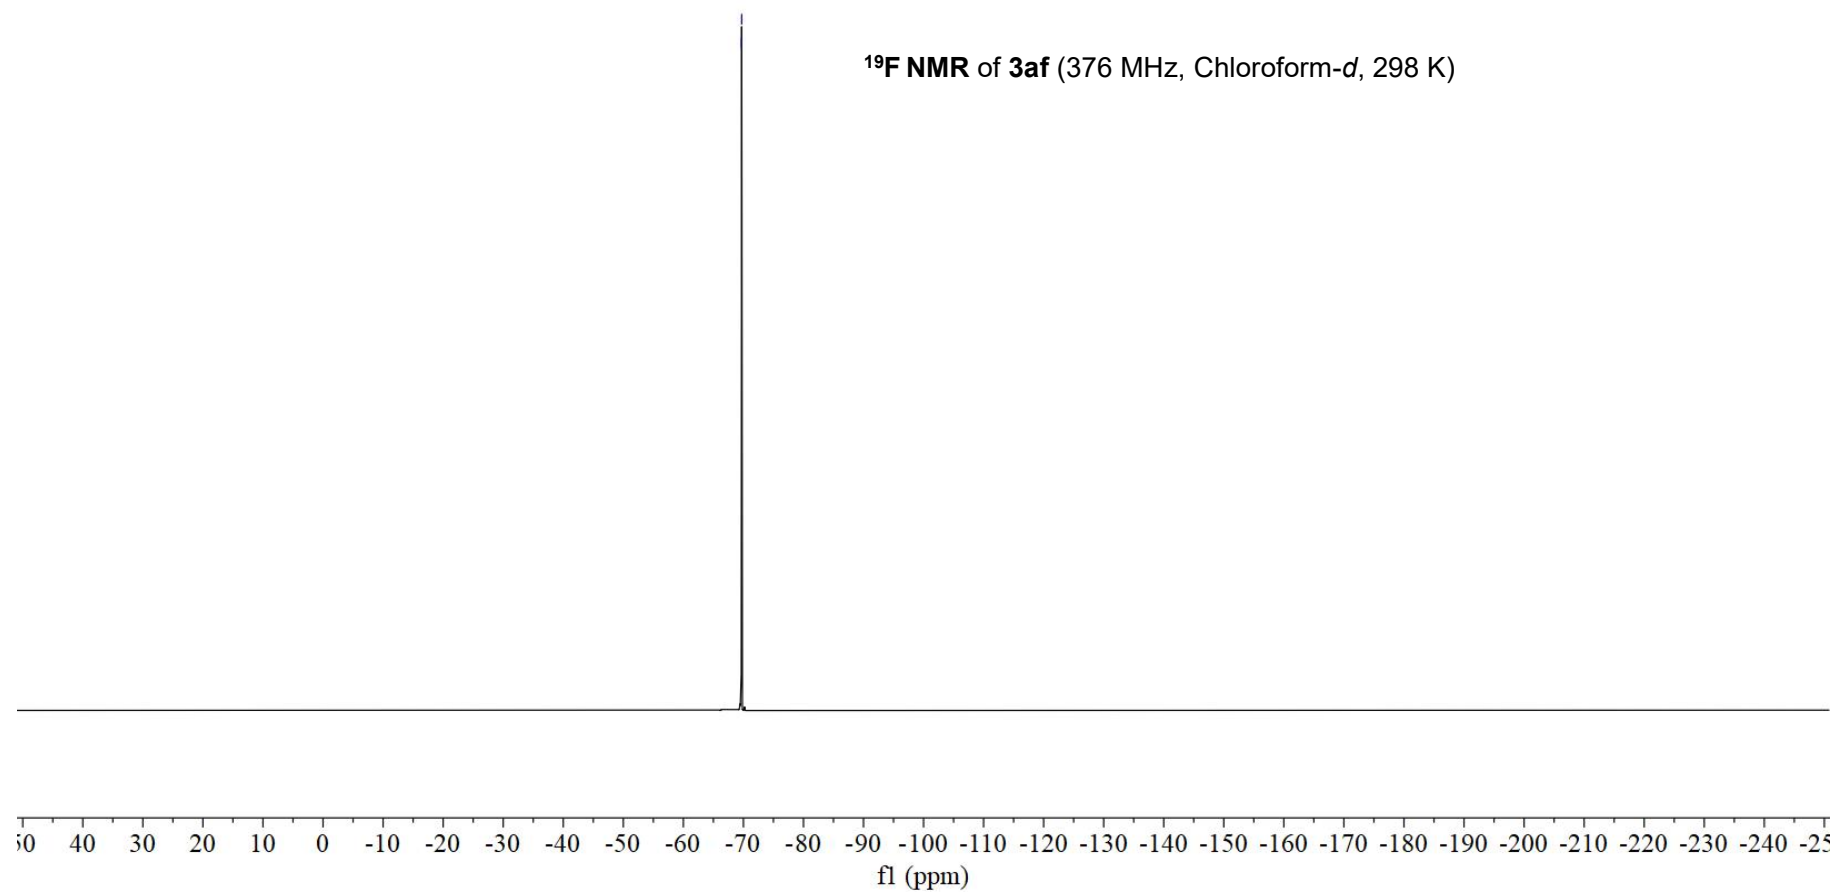

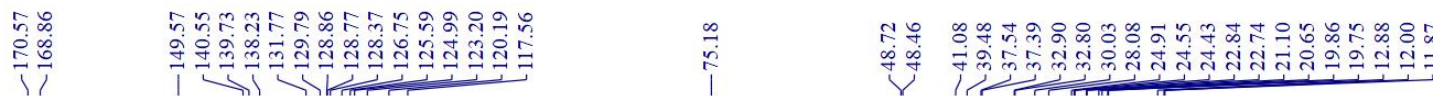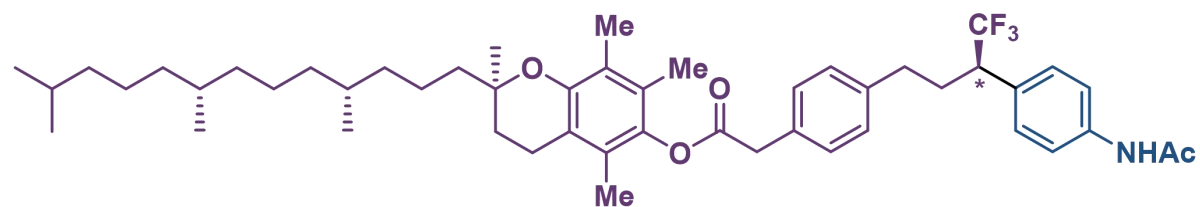

<sup>13</sup>C NMR of 3af (101 MHz, Chloroform-*d*, 298 K)

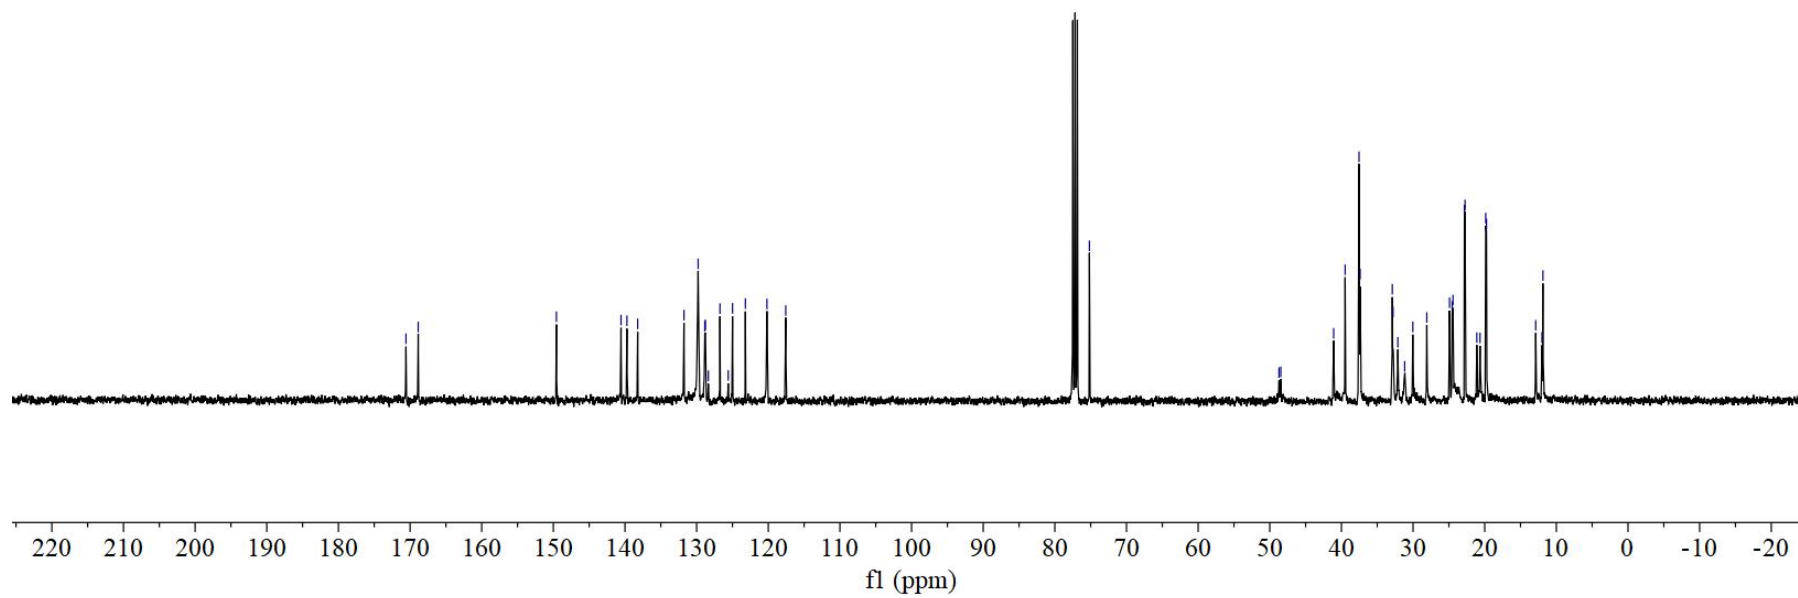

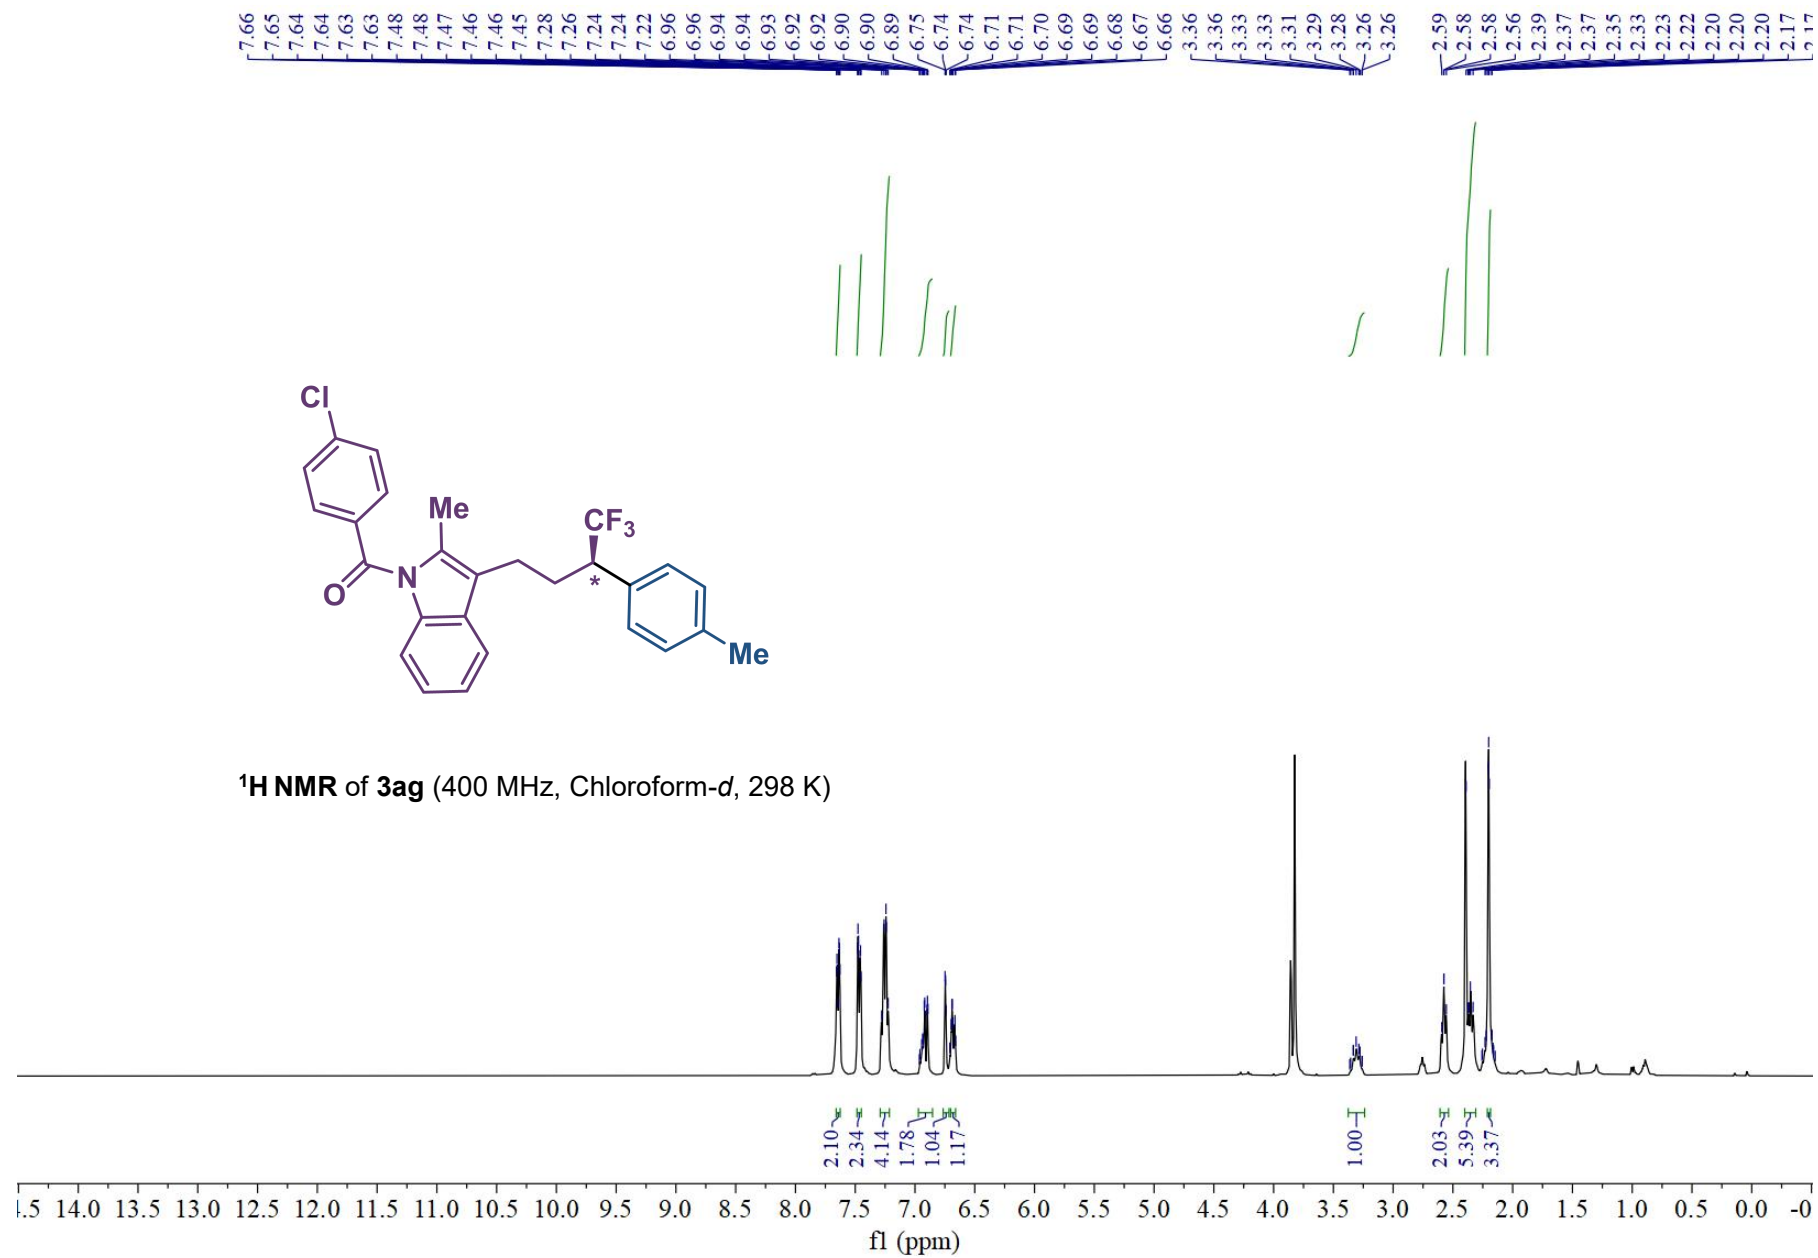



-69.65  
-69.68

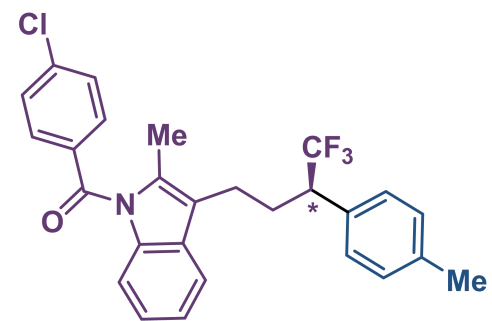

**<sup>19</sup>F NMR of 3ag** (376 MHz, Chloroform-*d*, 298 K)

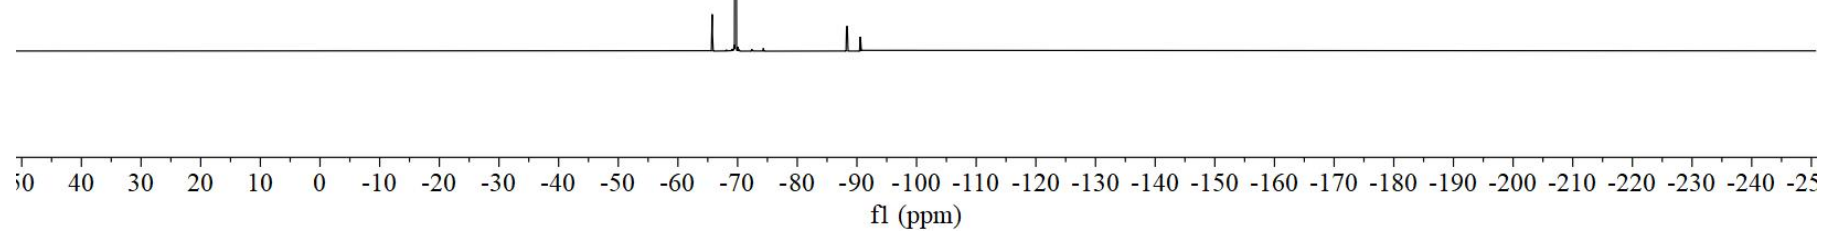

— 168.34  
— 156.05  
— 139.17  
— 138.32  
— 134.42  
— 134.29  
— 131.42  
— 131.19  
— 131.11  
— 130.88  
— 129.64  
— 129.20  
— 128.45  
— 125.66  
— 118.45  
— 115.18  
— 111.43  
— 101.20

— 55.71  
— 49.73  
— 49.46  
— 49.20  
— 48.94

— 28.46

— 21.23

— 13.30

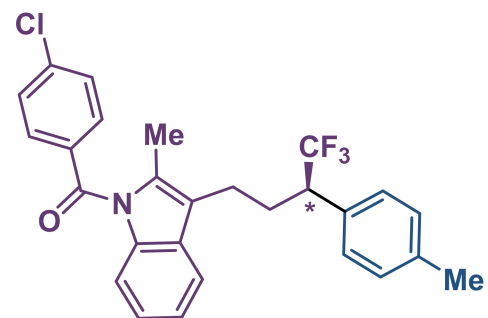

<sup>13</sup>C NMR of **3ag** (101 MHz, Chloroform-*d*, 298 K)

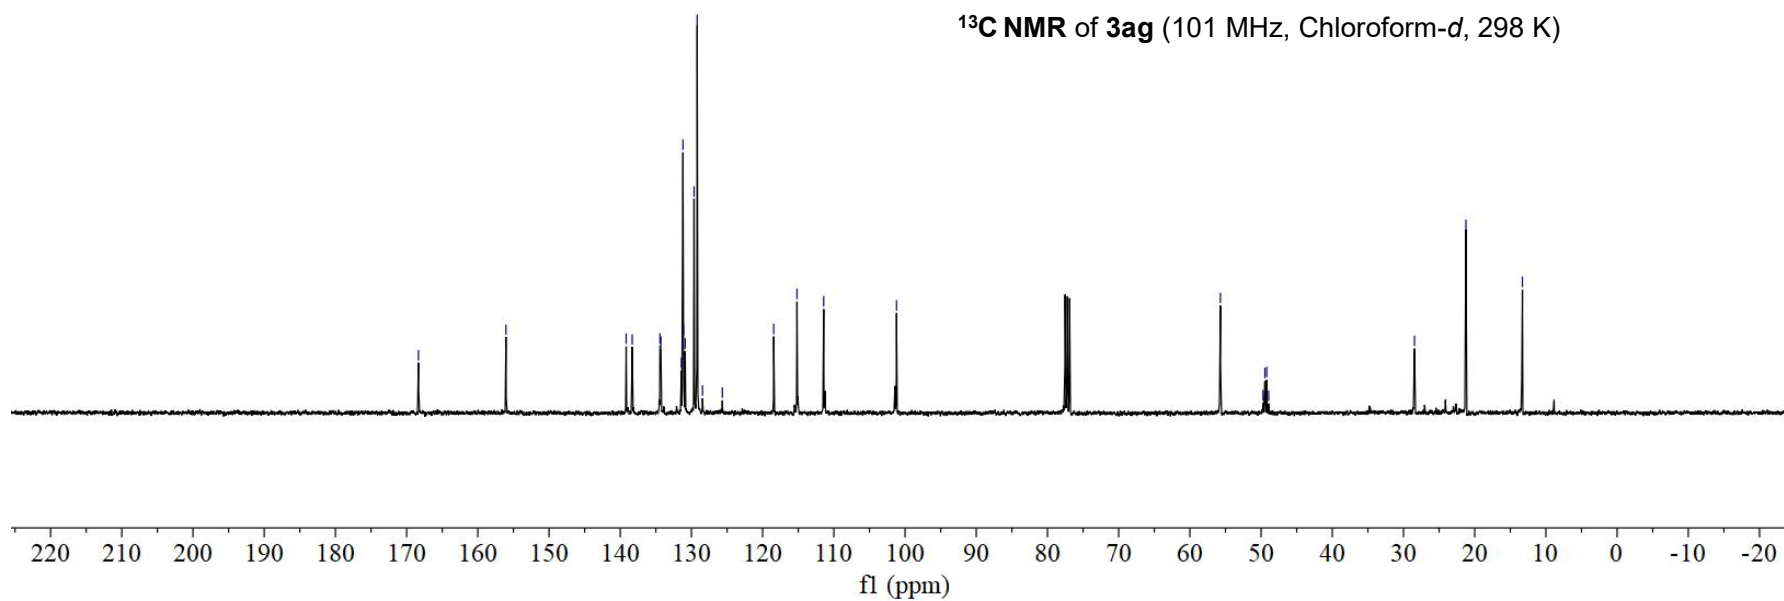

7.26  
7.25  
7.24  
7.22  
7.19  
7.18  
7.17  
7.16  
7.15  
7.15  
7.06  
7.04  
7.03  
7.03  
7.01  
6.85  
6.80  
3.03  
3.02  
2.99  
2.98  
2.70  
2.69  
2.68  
2.66  
2.65  
2.64  
2.62  
2.60  
2.59  
2.57  
2.56  
2.55  
2.54  
2.53  
2.51  
2.42  
2.41  
2.40  
2.38  
2.37  
2.36  
2.35  
2.33  
2.32  
2.31  
2.30  
2.29  
1.94  
1.92  
1.91  
1.91  
1.90  
1.90  
1.89  
1.88  
1.87  
1.86  
1.85  
1.79  
1.77  
1.76  
1.75  
1.74  
1.72  
1.71  
1.70

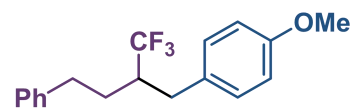

<sup>1</sup>H NMR of **5a** (400 MHz, Chloroform-*d*, 298 K)

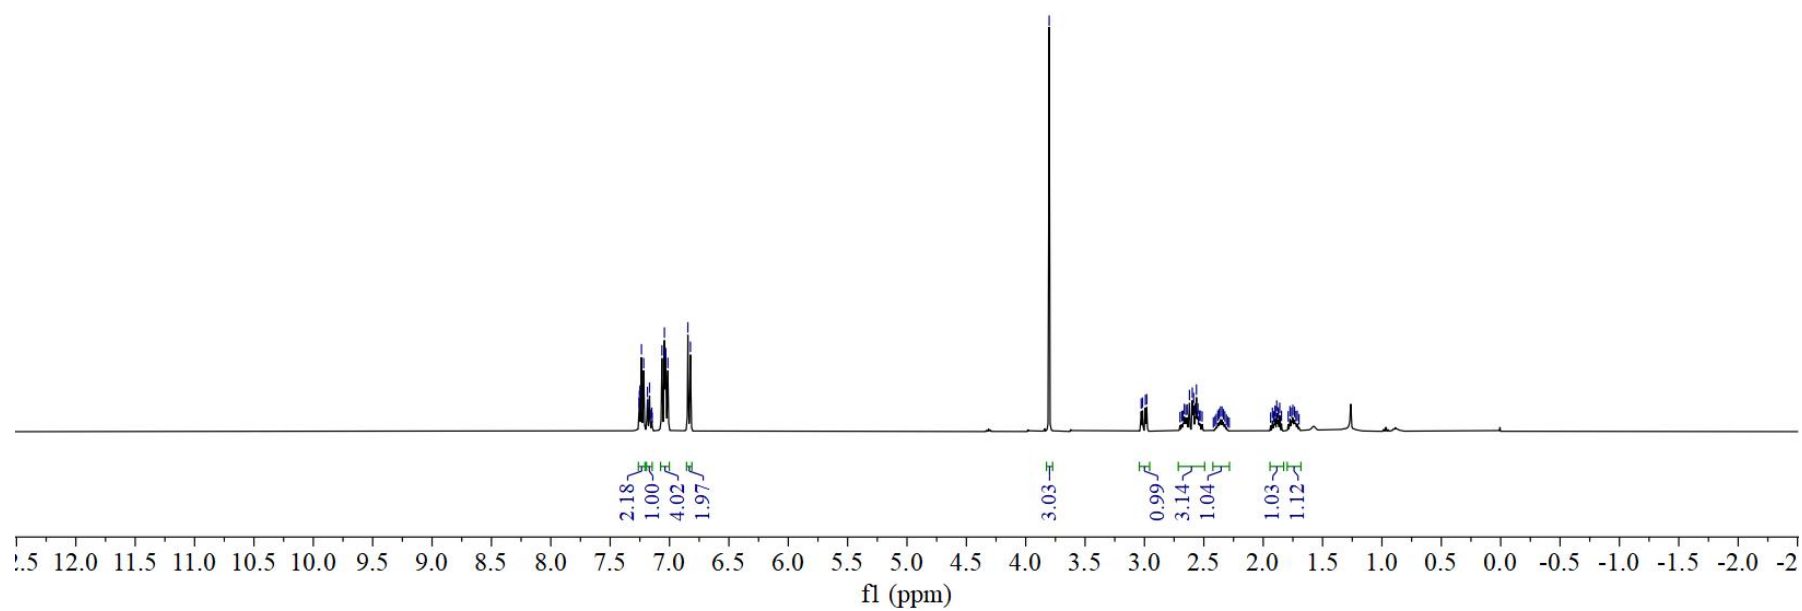

-69.83  
-69.85

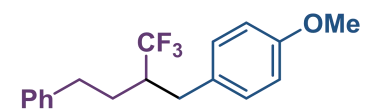

$^{19}\text{F}$  NMR of **5a** (376 MHz, Chloroform-*d*, 298 K)

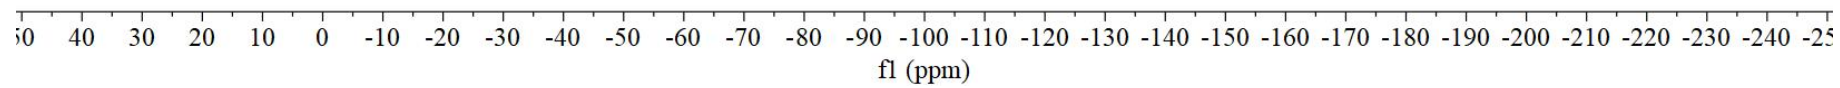

— 158.42  
141.15  
132.62  
130.15  
130.12  
129.84  
128.51  
128.43  
127.05  
126.14  
124.26  
— 114.07

— 55.35  
44.38  
44.13  
43.89  
43.64  
33.43  
33.07  
29.05

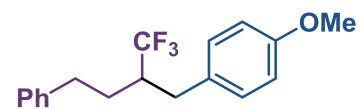

<sup>13</sup>C NMR of **5a** (101 MHz, Chloroform-*d*, 298 K)

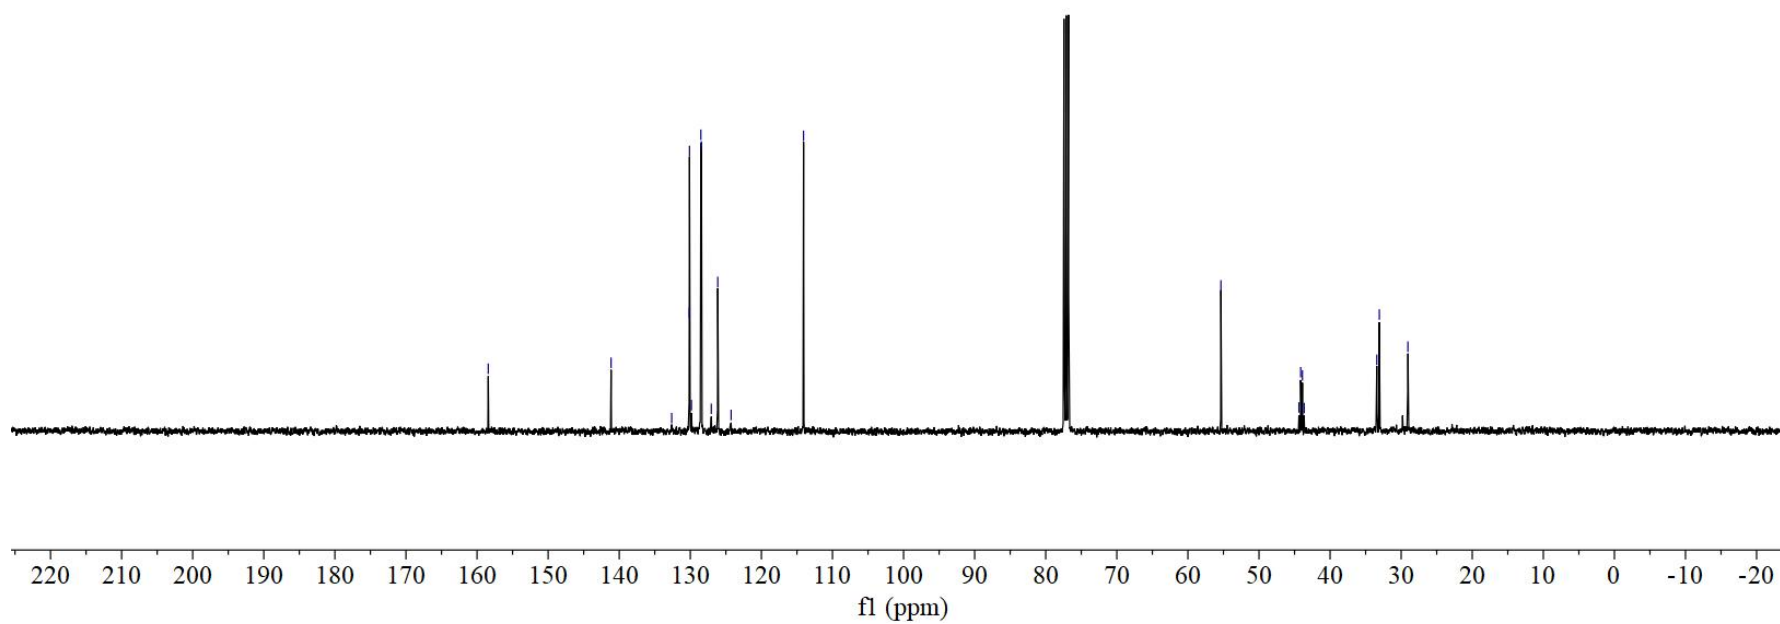

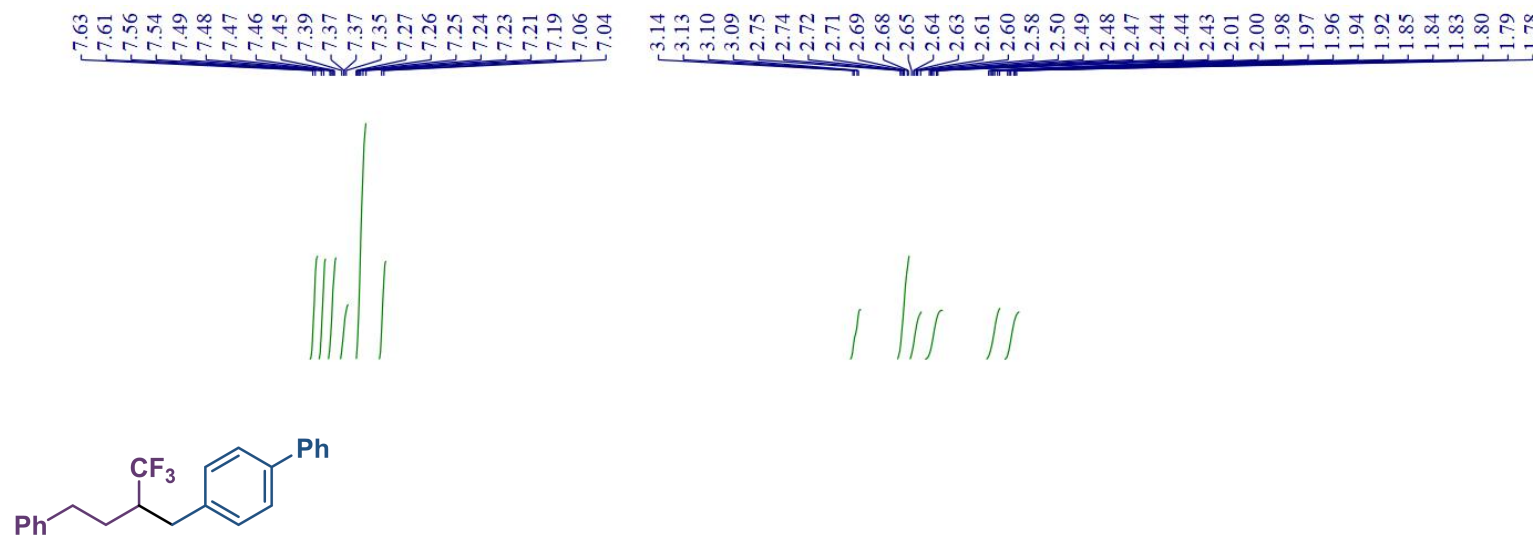

$^1\text{H NMR}$  of **5b** (400 MHz, Chloroform-*d*, 298 K)

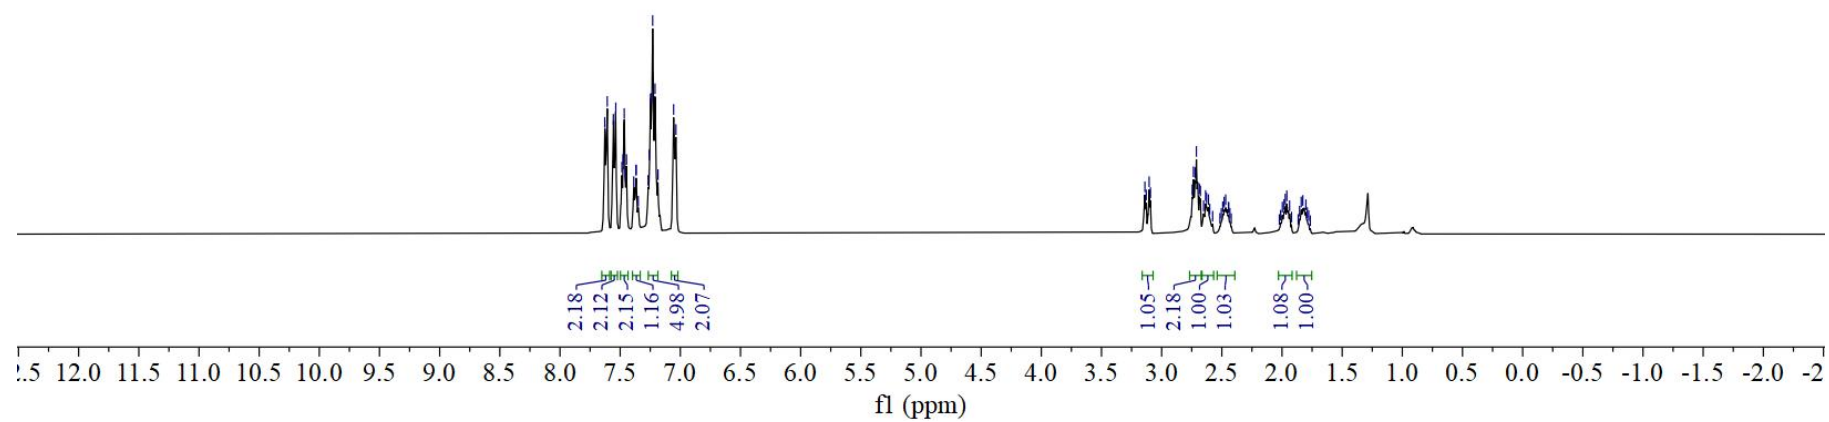

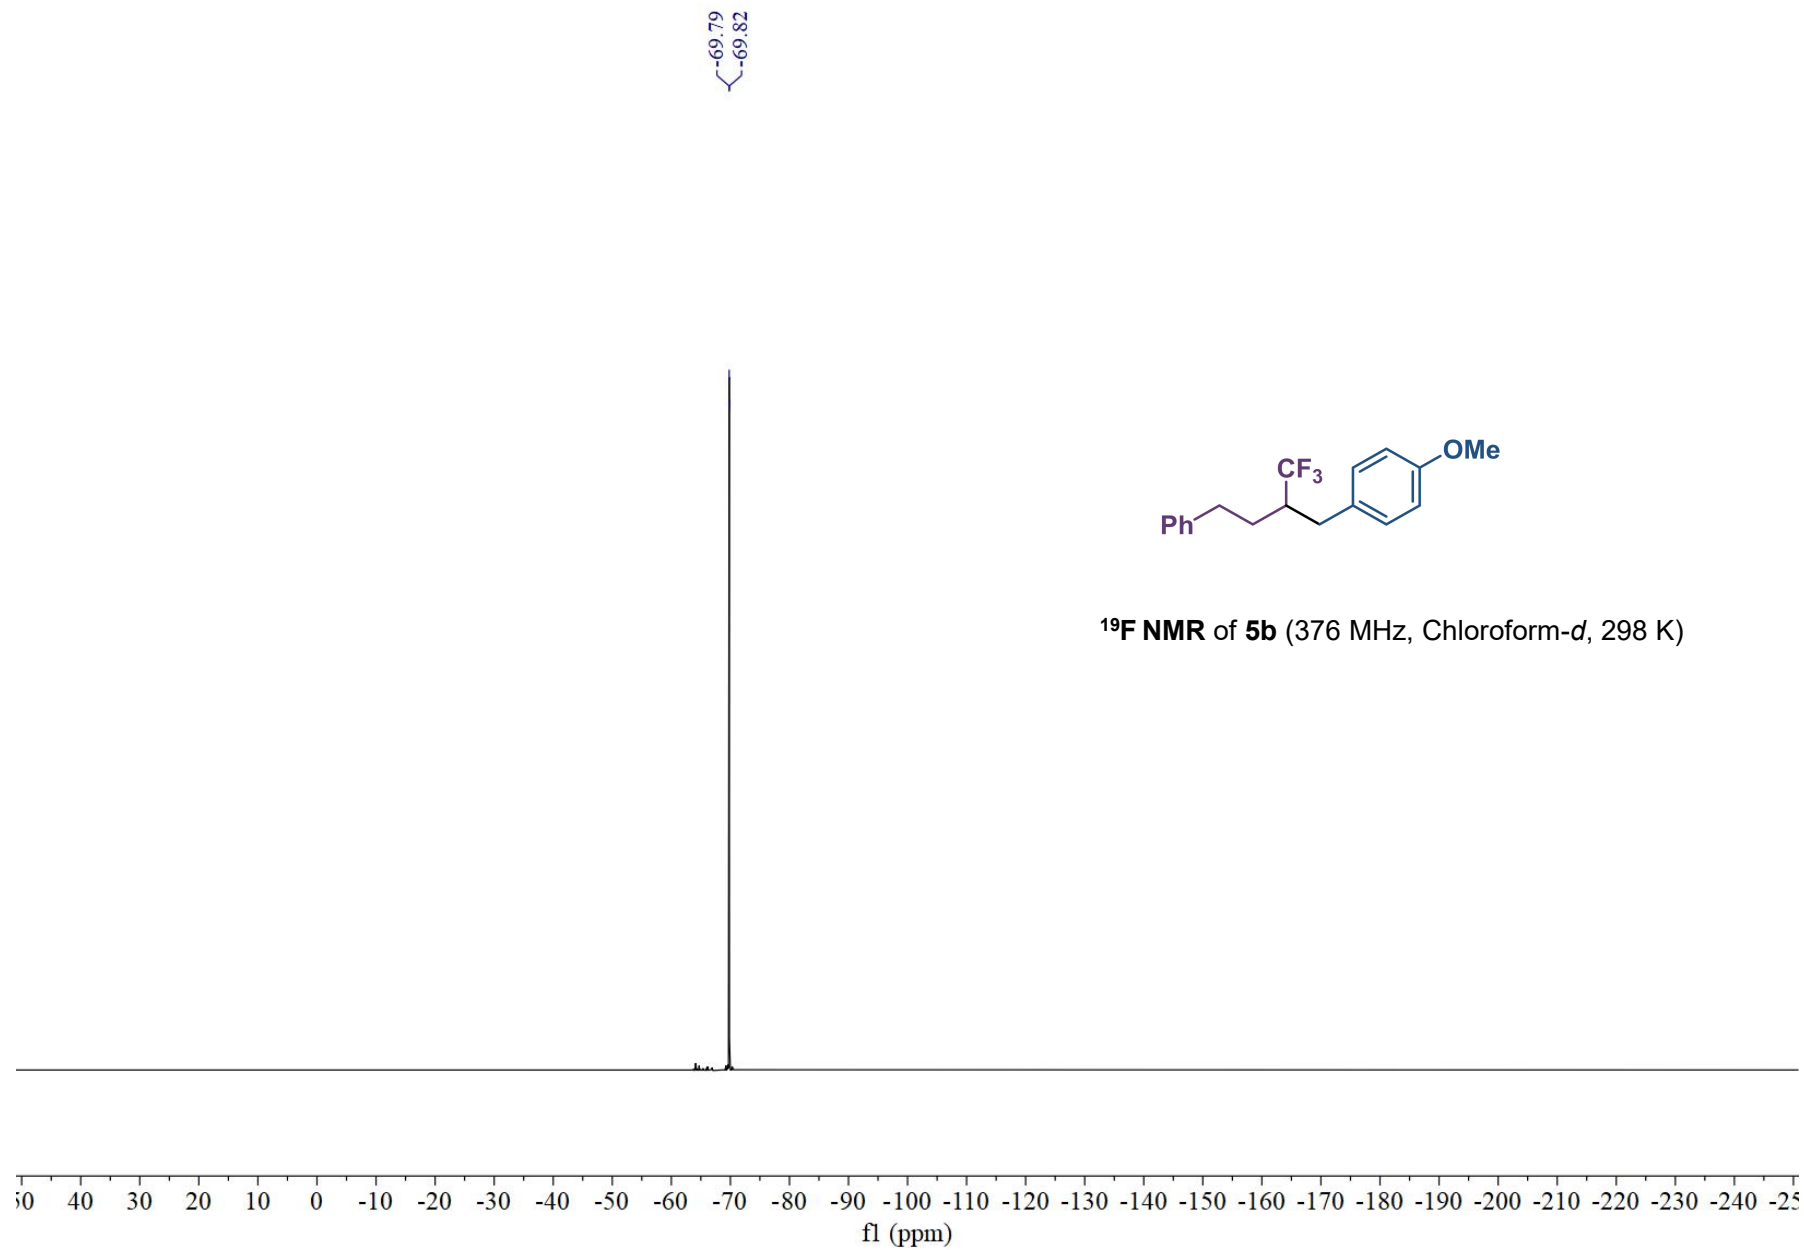

141.04  
140.87  
139.67  
137.29  
132.63  
129.85  
129.61  
128.93  
128.57  
128.48  
127.39  
127.13  
126.20

44.18  
43.93  
43.69  
43.45  
34.00  
33.07  
29.14



$^{13}\text{C}$  NMR of **5b** (101 MHz, Chloroform-*d*, 298 K)

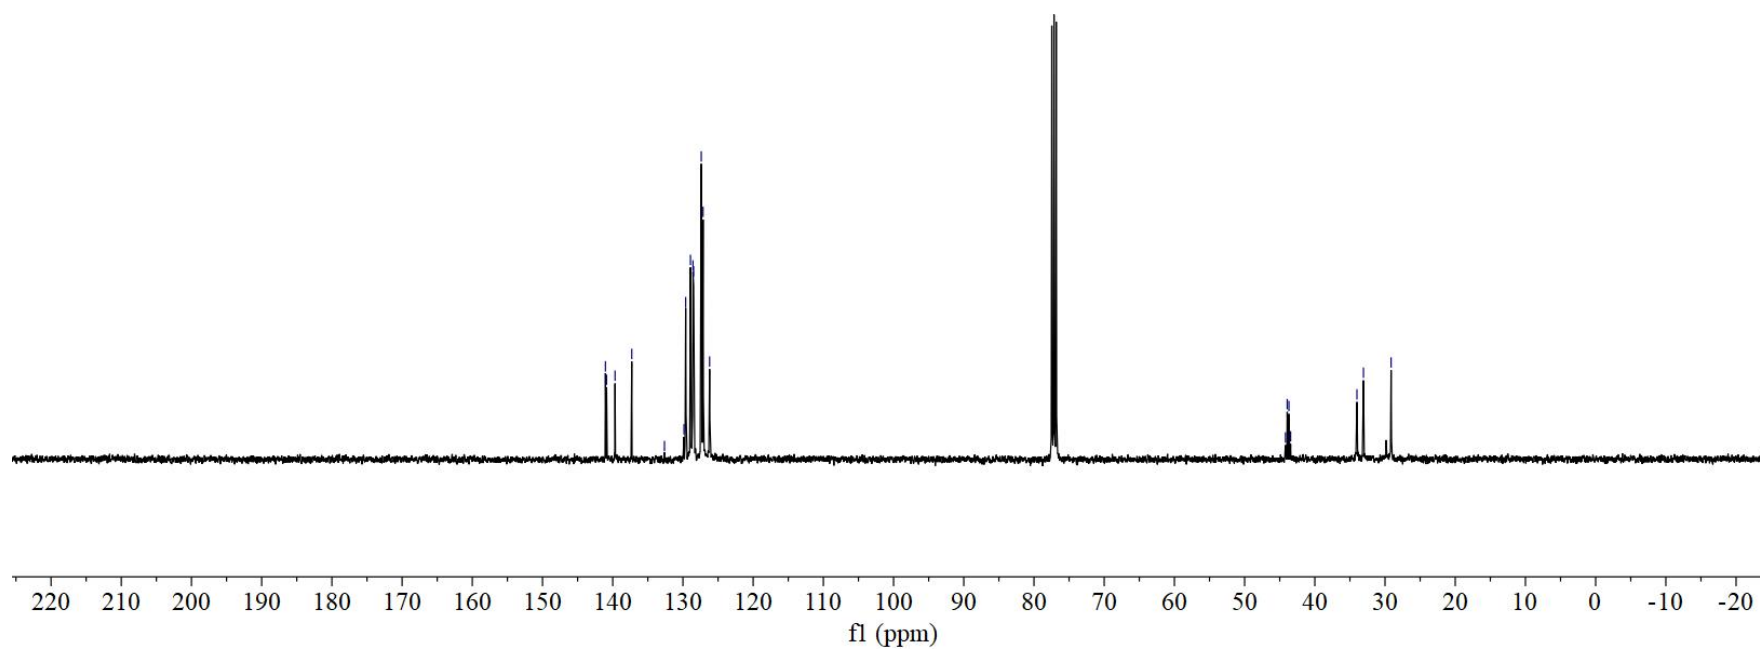



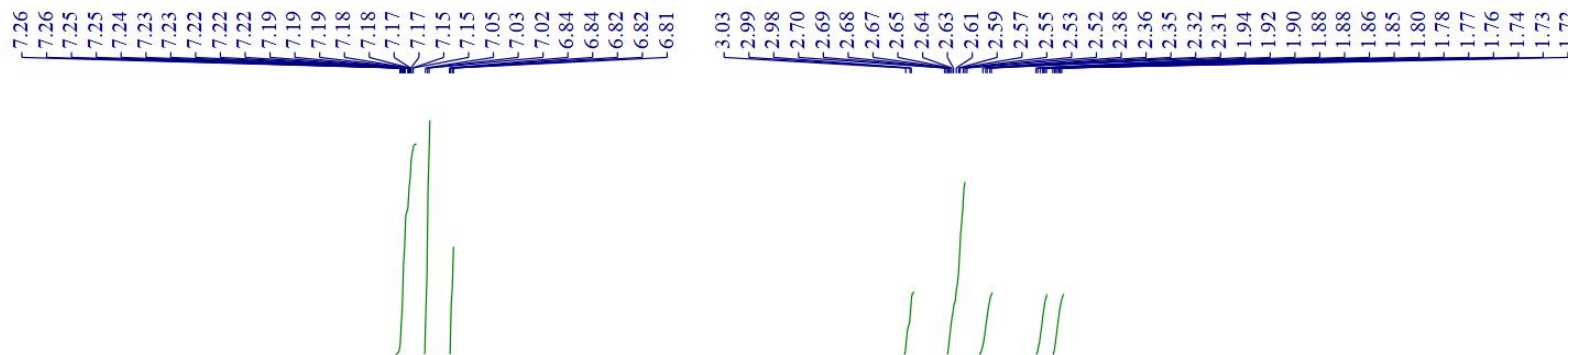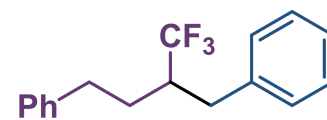

<sup>1</sup>H NMR of 5c (400 MHz, Chloroform-*d*, 298 K)

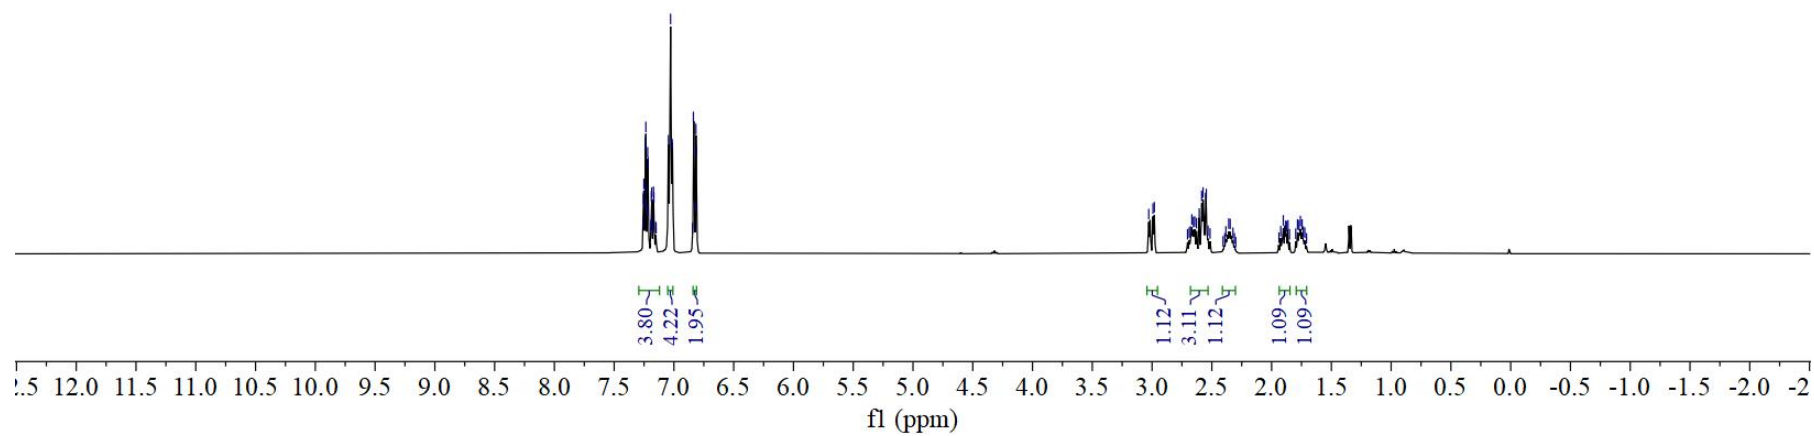

156.73  
141.18  
132.66  
130.14  
130.00  
129.86  
128.51  
128.44  
127.07  
126.08  
124.29  
116.26

44.34  
44.10  
43.86  
43.61  
33.47  
33.07  
29.04

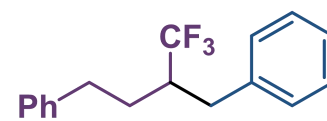

<sup>13</sup>C NMR of **5c** (100 MHz, Chloroform-*d*, 298 K)

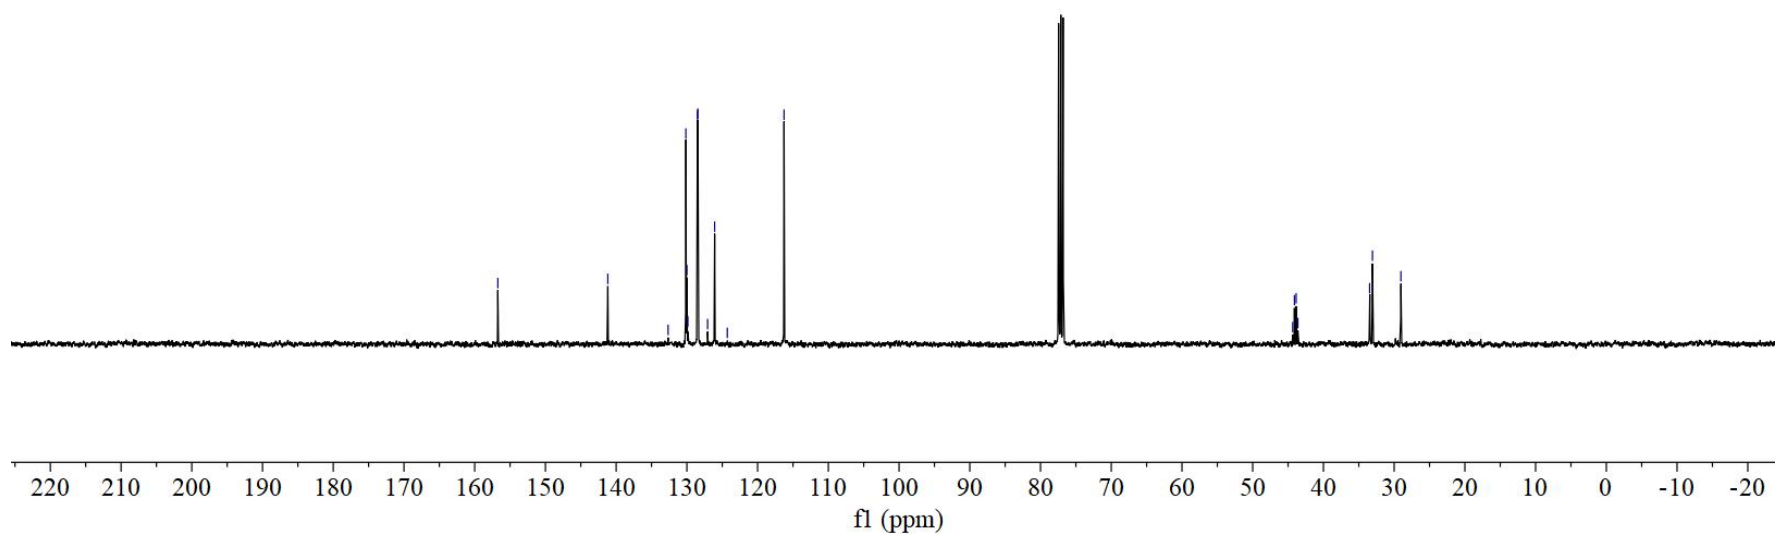

-69.86  
-69.89

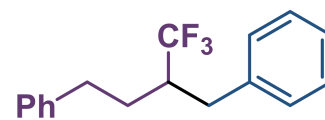

<sup>19</sup>F NMR of **5c** (376 MHz, Chloroform-*d*, 298 K)

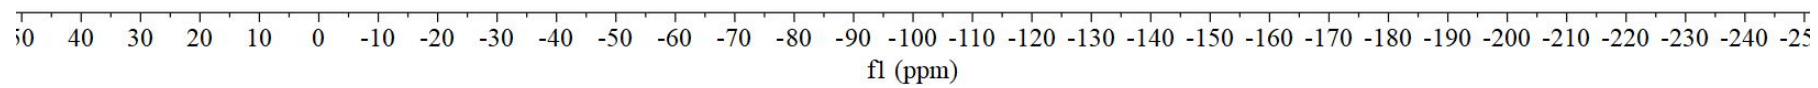

## REFERENCES

1. L. Candish, M. Teders, F. Glorius, Transition-Metal-Free, Visible-Light-Enabled Decarboxylative Borylation of Aryl N-Hydroxyphthalimide Esters. *J. Am. Chem. Soc.* **2017**, *139*, 7440-7443.
2. L. Huang, A. M. Olivares, D. J. Weix, Reductive Decarboxylative Alkynylation of N-Hydroxyphthalimide Esters with Bromoalkynes. *Angew. Chem. Int. Ed.*, **2017**, *56*, 11901-11905.
3. Y. Liang, G. C. Fu, Stereoconvergent Negishi Arylations of Racemic Secondary Alkyl Electrophiles: Differentiating between a CF<sub>3</sub> and an Alkyl Group. *J. Am. Chem. Soc.* **2015**, *137*, 9523-9526.
4. P. Xu, W. Fan, P. Chen, G. Liu, Enantioselective Radical Trifluoromethylation of Benzylic C-H Bonds via Cooperative Photoredox and Copper Catalysis. *J. Am. Chem. Soc.* **2022**, *144*, 13468-13474.
5. J. Qi, J. Xu, H. T. Ang, B. Wang, N. K. Gupta, S. R. Dubbaka, P. O'Neill, X. Mao, Y. Lum, J. Wu, Electrophotocatalytic Synthesis Facilitated Trifluoromethylation of Arenes Using Trifluoroacetic Acid. *J. Am. Chem. Soc.* **2023**, *145*, 24965-24971.
6. K. J. Bian, Y. C. Lu, D. Nemoto Jr, S. C. Kao, X. Chen, J. G. West, Photocatalytic hydrofluoroalkylation of alkenes with carboxylic acids. *Nat. Chem.* **2023**, *15*, 1683-1692.
7. S. F. García, V. O. Chantzakou, F. J. Hernández. Direct Decarboxylation of Trifluoroacetates Enabled by Iron Photocatalysis. *Angew. Chem. Int. Ed.* **2024**, *63*, e202311984.
8. Y. Min, J. Sheng, J. L. Yu, S. X. Ni, G. Ma, H. Gong, X. S. Wang, Diverse Synthesis of Chiral Trifluoromethylated Alkanes via Nickel-Catalyzed Asymmetric Reductive Cross-Coupling Fluoroalkylation. *Angew. Chem., Int. Ed.* **2021**, *60*, 9947-9952.
9. Y. Liang, G. C. Fu, Stereoconvergent Negishi Arylations of Racemic Secondary Alkyl Electrophiles: Differentiating between a CF<sub>3</sub> and an Alkyl Group. *J. Am. Chem. Soc.* **2015**, *137*, 9523-9526.
